# Supplementary material for: Cell-type-specific expression quantitative trait loci associated with Alzheimer disease in blood and brain tissue
Source: PubMed Central journal article supplement (PMC8079392; doi:10.1038/s41398-021-01373-z), 2021-04-27
Supplement: 41398_2021_1373_MOESM2_ESM.pdf [file 41398_2021_1373_MOESM2_ESM.pdf]

**Supplemental Resources.** Top-ranked eSNPs per eGene for significant eQTLs and ct-eQTLs in blood and brain.

| FHS (blood) eQTLs |                   |         |           |           | FHS (blood) ct-eQTLs |                   |                                    |
|-------------------|-------------------|---------|-----------|-----------|----------------------|-------------------|------------------------------------|
| Gene              | Top eSNP Position | Beta    | Std Error | P-value   | Gene                 | Top eSNP Position | Cell-type                          |
| A2M               | 12:9172332        | 0.33    | 0.0088    | 1.95E-272 | AAK1                 | 2:69672414        | Erythrocytes                       |
| A4GALT            | 22:43115776       | -0.0747 | 0.00741   | 1.14E-23  | AAK1                 | 2:69672414        | Monocytes / Macrophages            |
| AACS              | 12:125593318      | -0.0227 | 0.00289   | 5.15E-15  | ABCA6                | 17:67162715       | Erythrocytes                       |
| AAGAB             | 15:67490486       | 0.0322  | 0.00471   | 9.22E-12  | ABCA6                | 17:67162715       | Monocytes / Macrophages            |
| AAMDC             | 11:77580548       | 0.161   | 0.00517   | 1.65E-196 | ABCA6                | 17:67162715       | Neutrophils 1                      |
| AASDH             | 4:57276739        | 0.114   | 0.00679   | 5.10E-62  | ABCA9                | 17:67062977       | CD4+ T-Cells                       |
| AASS              | 7:121784441       | 0.165   | 0.00693   | 1.63E-118 | ABCA9                | 17:66925923       | Erythrocytes                       |
| ABCA10            | 17:67289504       | -0.0364 | 0.00434   | 6.29E-17  | ABCA9                | 17:66925923       | Monocytes / Macrophages            |
| ABCA11P           | 4:458667          | 0.0753  | 0.00746   | 9.30E-24  | ABCA9                | 17:66925923       | Neutrophils 1                      |
| ABCA2             | 9:139927062       | 0.0418  | 0.00373   | 6.54E-29  | ABLM1                | 10:116342377      | Monocytes / Macrophages            |
| ABCA5             | 17:67289504       | -0.0655 | 0.00533   | 2.82E-34  | ACCS                 | 11:44087989       | Interferon response/Anti-bacterial |
| ABCA7             | 19:1100976        | 0.0173  | 0.00236   | 2.88E-13  | ACCS                 | 11:44087989       | NK cells / CD8+ T-Cells            |
| ABCB4             | 7:87078547        | 0.0609  | 0.00697   | 3.15E-18  | ACTA2                | 10:90754607       | Interferon response/Anti-bacterial |
| ABCB5             | 7:20735885        | -0.036  | 0.00557   | 1.11E-10  | ADAMTS6              | 5:64796549        | Monocytes / Macrophages            |
| ABCC1             | 16:16043174       | 0.0595  | 0.00534   | 1.45E-28  | ADAMTS6              | 5:64796549        | Neutrophils 1                      |
| ABCC13            | 21:15653302       | 0.0621  | 0.0069    | 3.29E-19  | ADK                  | 10:76248814       | Interferon response/Anti-bacterial |
| ABCC3             | 17:48712087       | -0.0752 | 0.00326   | 2.87E-112 | ADK                  | 10:76248814       | Monocytes / Macrophages            |
| ABCC4             | 13:95986038       | 0.207   | 0.0129    | 1.99E-56  | ADK                  | 10:75928933       | Unknown                            |
| ABCC5             | 3:183743647       | -0.134  | 0.00369   | 4.53E-258 | ADPRM                | 17:10596713       | Interferon response/Anti-bacterial |
| ABCD2             | 12:39905180       | 0.0494  | 0.00672   | 2.25E-13  | AFAP1                | 4:7939008         | Interferon response/Anti-bacterial |
| ABCD3             | 1:94874521        | -0.0828 | 0.00386   | 8.89E-98  | AFF3                 | 2:100573658       | Erythrocytes                       |
| ABCF2             | 7:150915471       | 0.0471  | 0.00295   | 4.36E-56  | AGA                  | 4:178361621       | Interferon response/Anti-bacterial |
| ABCF3             | 3:183930979       | -0.0259 | 0.00399   | 9.91E-11  | AGFG1                | 2:228445810       | CD4+ T-Cells                       |
| ABCG1             | 21:43641657       | -0.0299 | 0.00446   | 2.01E-11  | AGFG1                | 2:228445810       | Erythrocytes                       |
| ABCG2             | 4:89090354        | 0.0602  | 0.00781   | 1.53E-14  | AGFG1                | 2:228445810       | Unknown                            |
| ABHD10            | 3:111697867       | 0.0884  | 0.00473   | 1.34E-75  | AGPAT5               | 8:6556685         | Erythrocytes                       |
| ABHD11            | 7:73149302        | -0.0474 | 0.00318   | 2.90E-49  | AHI1                 | 6:135797808       | Interferon response/Anti-bacterial |
| ABHD12            | 20:25333189       | 0.0582  | 0.00326   | 4.52E-69  | AIF1                 | 6:31548451        | Erythrocytes                       |
| ABHD12B           | 14:51372103       | 0.217   | 0.00735   | 1.63E-176 | AKAP10               | 17:19795946       | Interferon response/Anti-bacterial |
| ABHD15            | 17:27917771       | -0.0308 | 0.00359   | 1.39E-17  | ALDH5A1              | 6:24464026        | NK cells / CD8+ T-Cells            |
| ABHD2             | 15:89612330       | 0.0832  | 0.0061    | 1.26E-41  | ALOX15               | 17:4588856        | Interferon response/Anti-bacterial |
| ABHD3             | 18:19235006       | -0.0492 | 0.00545   | 2.61E-19  | ALOX15               | 17:4559393        | Neutrophils 10                     |
| ABHD4             | 14:23075116       | 0.0246  | 0.00318   | 1.13E-14  | ANK2                 | 4:113995834       | Erythrocytes                       |
| ABI1              | 10:27033193       | -0.029  | 0.0027    | 1.01E-26  | ANKDD1A              | 15:65198309       | Interferon response/Anti-bacterial |
| ABI3BP            | 3:100468407       | -0.0195 | 0.00197   | 6.56E-23  | ANPEP                | 15:90389045       | Interferon response/Anti-bacterial |

|        |              |         |         |           |          |              |                                    |
|--------|--------------|---------|---------|-----------|----------|--------------|------------------------------------|
| ABL2   | 1:179103834  | -0.0401 | 0.00584 | 7.22E-12  | AP3B1    | 5:77499698   | Monocytes / Macrophages            |
| ABLIM3 | 5:148471603  | 0.0702  | 0.0113  | 5.03E-10  | AP3S2    | 15:90403035  | Interferon response/Anti-bacterial |
| ABO    | 9:136139907  | 0.0265  | 0.00409 | 1.03E-10  | APIP     | 11:34919083  | Interferon response/Anti-bacterial |
| ABRACL | 6:139350182  | 0.145   | 0.00683 | 1.49E-95  | APOBR    | 16:28508447  | Interferon response/Anti-bacterial |
| ABTB1  | 3:127390525  | -0.0576 | 0.00583 | 8.54E-23  | APPL1    | 3:57305253   | Erythrocytes                       |
| ABTB2  | 11:34423774  | -0.0221 | 0.00248 | 7.61E-19  | ARFIP1   | 4:153695779  | Interferon response/Anti-bacterial |
| ACAA2  | 18:47296298  | 0.0484  | 0.00586 | 1.84E-16  | ARHGAP44 | 17:12931969  | Erythrocytes                       |
| ACACA  | 17:35782182  | 0.0212  | 0.0032  | 3.79E-11  | ARHGAP44 | 17:12750576  | Monocytes / Macrophages            |
| ACACB  | 12:109592558 | 0.0539  | 0.00289 | 1.96E-75  | ARHGAP44 | 17:12706535  | Neutrophils 1                      |
| ACAD8  | 11:134139780 | 0.0487  | 0.00351 | 5.66E-43  | ARHGAP44 | 17:12932753  | Neutrophils 2                      |
| ACAD9  | 3:128619505  | -0.236  | 0.0148  | 6.95E-56  | ARL15    | 5:53645362   | Interferon response/Anti-bacterial |
| ACADM  | 1:76174280   | 0.199   | 0.0117  | 1.47E-63  | ARNTL    | 11:13305689  | Interferon response/Anti-bacterial |
| ACADSB | 10:124790152 | -0.0294 | 0.00483 | 1.21E-09  | AS3MT    | 10:104623053 | Interferon response/Anti-bacterial |
| ACADVL | 17:7164563   | 0.0483  | 0.00434 | 1.59E-28  | ASAH1    | 8:17928023   | Interferon response/Anti-bacterial |
| ACAP1  | 17:7234112   | 0.124   | 0.00735 | 4.24E-62  | ASNSD1   | 2:190583569  | Interferon response/Anti-bacterial |
| ACAT1  | 11:108047982 | -0.0763 | 0.00514 | 6.72E-49  | ASPN     | 9:95172242   | Interferon response/Anti-bacterial |
| ACAT2  | 6:160211554  | -0.0325 | 0.00472 | 6.46E-12  | ATXN7L3B | 12:74960460  | Interferon response/Anti-bacterial |
| ACBD3  | 1:226372266  | 0.0408  | 0.00377 | 4.22E-27  | BACE2    | 21:42660973  | Erythrocytes                       |
| ACCS   | 11:44078247  | -0.224  | 0.00473 | <1.0E-314 | BACE2    | 21:42517239  | Monocytes / Macrophages            |
| ACER3  | 11:76654777  | -0.128  | 0.00527 | 1.24E-122 | BCAR3    | 1:94127935   | Erythrocytes                       |
| ACIN1  | 14:23553110  | -0.0646 | 0.00403 | 2.24E-56  | BCL11A   | 2:60785864   | Erythrocytes                       |
| ACN9   | 7:96754216   | 0.243   | 0.0317  | 1.98E-14  | BCL11A   | 2:60775429   | Monocytes / Macrophages            |
| ACO1   | 9:32455320   | -0.0704 | 0.00471 | 1.34E-49  | BCL11A   | 2:60775429   | Neutrophils 1                      |
| ACO2   | 22:41854446  | -0.0246 | 0.00371 | 3.71E-11  | BLK      | 8:11443007   | Erythrocytes                       |
| ACOT4  | 14:74042189  | -0.0815 | 0.0078  | 2.41E-25  | BMF      | 15:40397191  | Erythrocytes                       |
| ACOT8  | 20:44478114  | -0.021  | 0.00308 | 1.11E-11  | BMPR1A   | 10:88511532  | Erythrocytes                       |
| ACOX1  | 17:73959857  | 0.19    | 0.00443 | <1.0E-314 | BMPR2    | 2:203395906  | Erythrocytes                       |
| ACP1   | 2:290003     | -0.132  | 0.0104  | 3.48E-36  | BTN2A1   | 6:26465768   | Interferon response/Anti-bacterial |
| ACP2   | 11:47257340  | 0.0623  | 0.00466 | 4.71E-40  | BTN3A2   | 6:26356853.1 | Interferon response/Anti-bacterial |
| ACP6   | 1:147135406  | 0.0649  | 0.00405 | 1.63E-56  | BTN3A2   | 6:26377385.1 | Monocytes / Macrophages            |
| ACPL2  | 3:140938546  | -0.134  | 0.00453 | 4.45E-178 | BTN3A2   | 6:26356038   | Neutrophils 10                     |
| ACPP   | 3:131989090  | 0.172   | 0.00805 | 2.36E-97  | BTN3A2   | 6:26356038.1 | NK cells / CD8+ T-Cells            |
| ACSL3  | 2:223724984  | 0.0263  | 0.00429 | 8.74E-10  | BTNL3    | 5:180366055  | Erythrocytes                       |
| ACSL5  | 10:114149860 | 0.0716  | 0.00321 | 3.00E-105 | BTNL3    | 5:180375306  | Interferon response/Anti-bacterial |
| ACSL6  | 5:131322241  | -0.0714 | 0.00449 | 1.41E-55  | BTNL3    | 5:180430797  | Monocytes / Macrophages            |
| ACSM1  | 16:20674116  | -0.0487 | 0.00455 | 1.94E-26  | BTNL3    | 5:180365855  | NK cells / CD8+ T-Cells            |
| ACSM3  | 16:20733134  | 0.0509  | 0.00644 | 3.34E-15  | C11orf80 | 11:66583502  | Erythrocytes                       |
| ACSS1  | 20:25039046  | 0.0187  | 0.00279 | 2.19E-11  | C11orf80 | 11:66583502  | Monocytes / Macrophages            |
| ACSS2  | 20:33468793  | -0.0212 | 0.00287 | 1.92E-13  | C11orf80 | 11:66583502  | Neutrophils 1                      |

|          |              |         |         |           |           |              |                                    |
|----------|--------------|---------|---------|-----------|-----------|--------------|------------------------------------|
| ACSS3    | 12:81423842  | -0.102  | 0.00744 | 2.37E-42  | C11orf80  | 11:66583502  | Neutrophils 2                      |
| ACTA2    | 10:90741615  | -0.219  | 0.0052  | <1.0E-314 | C14orf159 | 14:91572577  | Interferon response/Anti-bacterial |
| ACTB     | 7:5534598    | 1.1     | 0.0237  | <1.0E-314 | C15orf57  | 15:40869650  | Interferon response/Anti-bacterial |
| ACTL6A   | 3:179336625  | 0.0261  | 0.00322 | 6.38E-16  | C1orf85   | 1:156272271  | Interferon response/Anti-bacterial |
| ACTN1    | 14:69466699  | 0.0268  | 0.0039  | 7.21E-12  | C1orf85   | 1:156220056  | Monocytes / Macrophages            |
| ACTR10   | 14:58696823  | 0.16    | 0.0118  | 4.18E-41  | C22orf32  | 22:42492063  | Interferon response/Anti-bacterial |
| ACTR1A   | 10:104223628 | -0.0223 | 0.00356 | 3.83E-10  | C22orf32  | 22:42493036  | NK cells / CD8+ T-Cells            |
| ACTR1B   | 2:98271946   | 0.0555  | 0.00395 | 3.49E-44  | C22orf34  | 22:50009300  | Interferon response/Anti-bacterial |
| ACTR2    | 2:65504780   | 0.0772  | 0.00416 | 1.33E-74  | C4BPA     | 1:207275799  | CD4+ T-Cells                       |
| ACTR3B   | 7:152461934  | -0.24   | 0.0388  | 6.67E-10  | C4BPA     | 1:207275294  | Erythrocytes                       |
| ACTR5    | 20:37406869  | 0.0576  | 0.00379 | 4.72E-51  | C4BPA     | 1:207272272  | Interferon response/Anti-bacterial |
| ACTR8    | 3:53899580   | 0.0445  | 0.00395 | 3.93E-29  | C4BPA     | 1:207275799  | Monocytes / Macrophages            |
| ACVR2A   | 2:148710361  | -0.0473 | 0.00499 | 3.92E-21  | C4BPA     | 1:207280739  | Neutrophils 10                     |
| ACVR2B   | 3:38507570   | -0.0345 | 0.00314 | 7.89E-28  | C4BPA     | 1:207279481  | NK cells / CD8+ T-Cells            |
| ACYP2    | 2:54368706   | 0.0354  | 0.00463 | 2.53E-14  | C4BPA     | 1:207269858  | Unknown                            |
| ADA      | 20:43271392  | -0.0522 | 0.00453 | 2.29E-30  | C9orf78   | 9:132554195  | Interferon response/Anti-bacterial |
| ADAL     | 15:43618863  | 0.149   | 0.00918 | 4.52E-58  | CABLES1   | 18:20768822  | Erythrocytes                       |
| ADAM12   | 10:127660351 | 0.0298  | 0.00316 | 5.67E-21  | CACNB2    | 10:18382714  | Erythrocytes                       |
| ADAM15   | 1:155033918  | 0.0312  | 0.00363 | 1.09E-17  | CACNB2    | 10:18404550  | Monocytes / Macrophages            |
| ADAM17   | 2:9647609    | -0.0677 | 0.00411 | 1.42E-59  | CACNB2    | 10:18398683  | Neutrophils 1                      |
| ADAM19   | 5:156928008  | -0.0611 | 0.00452 | 6.73E-41  | CAT       | 11:34456108  | Neutrophils 10                     |
| ADAM20   | 14:71048562  | 0.107   | 0.00858 | 2.29E-35  | CCDC125   | 5:68598839   | Interferon response/Anti-bacterial |
| ADAM22   | 7:87539249   | 0.0378  | 0.00459 | 2.08E-16  | CCDC15    | 11:124933582 | Interferon response/Anti-bacterial |
| ADAM23   | 2:207414601  | -0.0505 | 0.00623 | 6.31E-16  | CCDC171   | 9:15574495   | Erythrocytes                       |
| ADAM28   | 8:24219671   | 0.0925  | 0.00711 | 3.96E-38  | CCDC171   | 9:15504000   | Interferon response/Anti-bacterial |
| ADAM32   | 8:38965271   | -0.0659 | 0.0033  | 1.86E-85  | CCDC23    | 1:43267130   | Interferon response/Anti-bacterial |
| ADAM9    | 8:38842839   | 0.0636  | 0.00678 | 8.53E-21  | CCDC23    | 1:43249620   | NK cells / CD8+ T-Cells            |
| ADAMDEC1 | 8:24220787   | 0.0248  | 0.00303 | 3.34E-16  | CCDC88A   | 2:55480212   | Erythrocytes                       |
| ADAMTS1  | 21:28215827  | 0.0723  | 0.00559 | 9.18E-38  | CCDC88A   | 2:55480212   | Monocytes / Macrophages            |
| ADAMTS6  | 5:64823492   | -0.134  | 0.0044  | 3.86E-188 | CCL2      | 17:32538280  | B-cells                            |
| ADAMTSL4 | 1:150539971  | 0.103   | 0.00986 | 1.65E-25  | CCL2      | 17:32532532  | Neutrophils 1                      |
| ADAR     | 1:154557685  | 0.0478  | 0.00435 | 7.53E-28  | CCR3      | 3:46289113   | Interferon response/Anti-bacterial |
| ADARB1   | 21:46564154  | 0.0446  | 0.00439 | 5.40E-24  | CCR3      | 3:46276878   | Neutrophils 10                     |
| ADARB2   | 10:1282530   | -0.0302 | 0.00229 | 2.95E-39  | CD28      | 2:204589944  | Monocytes / Macrophages            |
| ADAT1    | 16:75647536  | 0.104   | 0.00434 | 2.01E-120 | CD3D      | 11:118167495 | Monocytes / Macrophages            |
| ADAT2    | 6:143789040  | -0.0397 | 0.00502 | 3.49E-15  | CD55      | 1:207489959  | Interferon response/Anti-bacterial |
| ADCK1    | 14:78222798  | -0.144  | 0.00677 | 1.65E-96  | CD83      | 6:14159371   | Monocytes / Macrophages            |
| ADCK2    | 7:140359732  | 0.0685  | 0.00711 | 9.06E-22  | CD93      | 20:23102752  | Interferon response/Anti-bacterial |
| ADCK3    | 1:227175245  | -0.0333 | 0.00265 | 9.20E-36  | CD96      | 3:111304090  | Monocytes / Macrophages            |

|         |              |         |         |           |          |              |                                    |
|---------|--------------|---------|---------|-----------|----------|--------------|------------------------------------|
| ADCY10  | 1:167737311  | 0.0309  | 0.00448 | 6.40E-12  | CDC14A   | 1:100880328  | Interferon response/Anti-bacterial |
| ADCY7   | 16:50369888  | -0.0428 | 0.0029  | 2.12E-48  | CDC16    | 13:115058408 | Erythrocytes                       |
| ADCY9   | 16:4161793   | -0.0647 | 0.0035  | 7.36E-74  | CDC16    | 13:115047305 | Interferon response/Anti-bacterial |
| ADD1    | 4:2854613    | -0.0329 | 0.00449 | 2.72E-13  | CDC42BPB | 14:103505057 | Erythrocytes                       |
| ADD3    | 10:111840725 | -0.0571 | 0.0042  | 1.63E-41  | CDC7     | 1:92021611   | NK cells / CD8+ T-Cells            |
| ADH6    | 4:100145592  | -0.0725 | 0.00756 | 1.18E-21  | CDS2     | 20:5141763   | Interferon response/Anti-bacterial |
| ADHFE1  | 8:67377417   | -0.0969 | 0.00471 | 1.18E-90  | CELSR1   | 22:46970868  | Erythrocytes                       |
| ADI1    | 2:3519283    | 0.127   | 0.00783 | 8.45E-58  | CELSR1   | 22:46857853  | Monocytes / Macrophages            |
| ADIPOR2 | 12:1831355   | -0.0323 | 0.00327 | 8.61E-23  | CENPC1   | 4:68297763   | Interferon response/Anti-bacterial |
| ADK     | 10:75928933  | -0.364  | 0.00836 | <1.0E-314 | CENPK    | 5:64902091   | Interferon response/Anti-bacterial |
| ADM     | 11:10294293  | -0.0286 | 0.0033  | 6.01E-18  | CENPK    | 5:64858687   | Monocytes / Macrophages            |
| ADO     | 10:64566572  | 0.0386  | 0.00578 | 2.74E-11  | CENPK    | 5:64859027   | NK cells / CD8+ T-Cells            |
| ADORA1  | 1:203106293  | 0.0186  | 0.00261 | 1.11E-12  | CENPK    | 5:64787704   | Unknown                            |
| ADORA2B | 17:15879303  | 0.09    | 0.00374 | 1.56E-121 | CEP192   | 18:13093774  | Interferon response/Anti-bacterial |
| ADORA3  | 1:112042149  | 0.0578  | 0.00549 | 1.07E-25  | CFD      | 19:886257    | Interferon response/Anti-bacterial |
| ADPGK   | 15:73018764  | 0.0426  | 0.00357 | 2.83E-32  | CFL2     | 14:35176730  | Interferon response/Anti-bacterial |
| ADPRH   | 3:119313876  | 0.169   | 0.0117  | 1.26E-46  | CHI3L1   | 1:203155882  | Interferon response/Anti-bacterial |
| ADPRM   | 17:10617803  | 0.197   | 0.00517 | 1.42E-281 | CHPT1    | 12:102086805 | Interferon response/Anti-bacterial |
| ADRB2   | 5:148207447  | -0.0761 | 0.00496 | 5.24E-52  | CISD1    | 10:60004851  | Interferon response/Anti-bacterial |
| ADSS    | 1:244524272  | 0.0959  | 0.0148  | 9.53E-11  | CLEC12A  | 12:10118747  | Erythrocytes                       |
| ADTRP   | 6:11714197   | -0.0451 | 0.0046  | 1.69E-22  | CLEC12A  | 12:10118428  | Interferon response/Anti-bacterial |
| AEBP2   | 12:19687105  | -0.0354 | 0.00477 | 1.37E-13  | CLEC12A  | 12:10126249  | Monocytes / Macrophages            |
| AFAP1   | 4:7871623    | -0.122  | 0.00302 | <1.0E-314 | CLEC12A  | 12:10118262  | Neutrophils 1                      |
| AFF1    | 4:87990864   | -0.0248 | 0.00373 | 3.13E-11  | CLEC12A  | 12:10118747  | Neutrophils 10                     |
| AFF3    | 2:100741766  | 0.0478  | 0.00498 | 1.07E-21  | CLEC12A  | 12:10117369  | NK cells / CD8+ T-Cells            |
| AFF4    | 5:132202411  | -0.0314 | 0.00329 | 1.81E-21  | CLEC12B  | 12:10118747  | Erythrocytes                       |
| AFG3L1P | 16:90063600  | 0.0581  | 0.00987 | 4.14E-09  | CLEC12B  | 12:10118135  | Interferon response/Anti-bacterial |
| AFG3L2  | 18:12327752  | 0.0443  | 0.0045  | 1.12E-22  | CLEC12B  | 12:10118262  | Neutrophils 1                      |
| AGA     | 4:178360550  | 0.178   | 0.00437 | <1.0E-314 | CLEC12B  | 12:10117369  | NK cells / CD8+ T-Cells            |
| AGAP1   | 2:236619055  | -0.0458 | 0.00573 | 1.67E-15  | CLEC17A  | 19:14763856  | Erythrocytes                       |
| AGAP3   | 7:150787450  | 0.0141  | 0.00195 | 5.27E-13  | CLEC4D   | 12:8682619   | Interferon response/Anti-bacterial |
| AGER    | 6:32154285   | -0.033  | 0.0038  | 5.91E-18  | CLEC4F   | 2:71049129   | Interferon response/Anti-bacterial |
| AGFG1   | 2:228295696  | 0.0322  | 0.00518 | 5.34E-10  | CLEC4F   | 2:71052580   | Monocytes / Macrophages            |
| AGL     | 1:100310736  | 0.0266  | 0.00341 | 8.32E-15  | CLEC9A   | 12:10190537  | Interferon response/Anti-bacterial |
| AGMO    | 7:15287676   | -0.0293 | 0.00298 | 1.42E-22  | CLHC1    | 2:55459373   | Interferon response/Anti-bacterial |
| AGPAT1  | 6:32136547   | -0.0327 | 0.00336 | 2.75E-22  | CLHC1    | 2:55459373   | Monocytes / Macrophages            |
| AGPAT4  | 6:161635526  | -0.0339 | 0.00567 | 2.28E-09  | CLN6     | 15:68540531  | Interferon response/Anti-bacterial |
| AGPAT5  | 8:6587922    | -0.0499 | 0.00459 | 3.74E-27  | CLNK     | 4:10571872   | CD4+ T-Cells                       |
| AGPAT9  | 4:84504821   | 0.0971  | 0.00614 | 4.13E-55  | CLNK     | 4:10510869   | Erythrocytes                       |

|         |              |         |         |           |           |             |                                    |
|---------|--------------|---------|---------|-----------|-----------|-------------|------------------------------------|
| AGPS    | 2:178216029  | -0.0424 | 0.00445 | 2.65E-21  | CLNK      | 4:10452986  | Monocytes / Macrophages            |
| AHCTF1  | 1:247115645  | 0.0641  | 0.00814 | 4.04E-15  | CLNK      | 4:10466181  | Neutrophils 1                      |
| AHCYL2  | 7:128861075  | -0.0274 | 0.00395 | 4.77E-12  | CLNK      | 4:10562143  | Neutrophils 2                      |
| AHI1    | 6:135624811  | 0.187   | 0.0045  | <1.0E-314 | CLNK      | 4:10649812  | NK cells / CD8+ T-Cells            |
| AHR     | 7:17319630   | -0.204  | 0.0216  | 5.25E-21  | CLUHP3    | 16:31754654 | Interferon response/Anti-bacterial |
| AHRR    | 5:299148     | -0.075  | 0.00534 | 5.42E-44  | CMBL      | 5:10286742  | Interferon response/Anti-bacterial |
| AHSA1   | 14:77929941  | -0.0607 | 0.00343 | 4.59E-68  | CMBL      | 5:10281549  | NK cells / CD8+ T-Cells            |
| AHSA2   | 2:61404931   | 0.0842  | 0.00467 | 1.32E-70  | CNR1      | 6:88856431  | Erythrocytes                       |
| AHSP    | 16:31521334  | 0.201   | 0.0276  | 3.81E-13  | CNR1      | 6:88856431  | Monocytes / Macrophages            |
| AIF1    | 6:31580539   | 0.0472  | 0.00526 | 3.88E-19  | CNTNAP1   | 17:40810228 | Erythrocytes                       |
| AIFM2   | 10:71910630  | 0.0176  | 0.00267 | 4.32E-11  | COCH      | 14:31308704 | Erythrocytes                       |
| AIG1    | 6:143376126  | -0.0842 | 0.00794 | 5.59E-26  | COCH      | 14:31308704 | Monocytes / Macrophages            |
| AIMP2   | 7:6061915    | -0.0678 | 0.00422 | 7.01E-57  | COPS3     | 17:17183479 | NK cells / CD8+ T-Cells            |
| AK2     | 1:33459484   | 0.0869  | 0.00565 | 2.98E-52  | CORIN     | 4:47845299  | Interferon response/Anti-bacterial |
| AK3     | 9:4758191    | 0.102   | 0.0165  | 6.34E-10  | COX6C     | 8:100869351 | Interferon response/Anti-bacterial |
| AK5     | 1:77897688   | -0.243  | 0.00957 | 2.23E-134 | CRISP2    | 6:49669359  | Neutrophils 10                     |
| AKAP1   | 17:55176058  | -0.0227 | 0.0035  | 9.41E-11  | CRISP2    | 6:49669359  | Neutrophils 2                      |
| AKAP10  | 17:19806050  | -0.17   | 0.0051  | 2.18E-220 | CRYZ      | 1:75217752  | Interferon response/Anti-bacterial |
| AKAP11  | 13:42906121  | -0.0317 | 0.00427 | 1.37E-13  | CSGALNACT | 8:19564149  | Interferon response/Anti-bacterial |
| AKAP13  | 15:86251500  | -0.0515 | 0.00709 | 4.42E-13  | CSGALNACT | 8:19564149  | Unknown                            |
| AKAP7   | 6:131462299  | 0.116   | 0.0108  | 1.74E-26  | CST7      | 20:24903185 | Erythrocytes                       |
| AKD1    | 6:109815955  | 0.125   | 0.00628 | 1.66E-84  | CYBRD1    | 2:172369069 | Interferon response/Anti-bacterial |
| AKIP1   | 11:8909816   | 0.0611  | 0.0047  | 4.67E-38  | CYP27A1   | 2:219630965 | Erythrocytes                       |
| AKIRIN1 | 1:39453785   | -0.0275 | 0.00398 | 5.06E-12  | CYP27A1   | 2:219633071 | Interferon response/Anti-bacterial |
| AKIRIN2 | 6:88402926   | 0.0466  | 0.0076  | 9.65E-10  | DAD1      | 14:23062016 | Interferon response/Anti-bacterial |
| AKNA    | 9:117180919  | 0.0166  | 0.00209 | 2.88E-15  | DAPK1     | 9:90178594  | Interferon response/Anti-bacterial |
| AKR1C2  | 10:4985193   | -0.276  | 0.011   | 2.17E-130 | DCAF10    | 9:37836508  | Interferon response/Anti-bacterial |
| AKR1C3  | 10:5131180   | -0.0851 | 0.0113  | 4.78E-14  | DCAF10    | 9:37753512  | NK cells / CD8+ T-Cells            |
| AKR1E2  | 10:4874916   | 0.387   | 0.0172  | 2.13E-107 | DCAF4     | 14:73393391 | Interferon response/Anti-bacterial |
| AKT1    | 14:105258892 | -0.0308 | 0.00369 | 7.51E-17  | DCBLD1    | 6:117801639 | Interferon response/Anti-bacterial |
| AKTIP   | 16:53522749  | -0.161  | 0.00759 | 2.48E-95  | DCLK2     | 4:150954757 | Erythrocytes                       |
| ALAD    | 9:116167156  | 0.0356  | 0.00363 | 1.76E-22  | DCLK2     | 4:150954757 | Monocytes / Macrophages            |
| ALCAM   | 3:105223763  | -0.134  | 0.00463 | 9.12E-172 | DCLK2     | 4:150950510 | Neutrophils 1                      |
| ALDH1A1 | 9:75597138   | -0.0728 | 0.00972 | 7.92E-14  | DCTN5     | 16:23704005 | Interferon response/Anti-bacterial |
| ALDH1B1 | 9:38397355   | -0.0984 | 0.00515 | 7.94E-79  | DGKH      | 13:42675906 | Monocytes / Macrophages            |
| ALDH2   | 12:112211833 | 0.063   | 0.00442 | 3.14E-45  | DIP2A     | 21:47960493 | CD4+ T-Cells                       |
| ALDH3A2 | 17:19559623  | 0.0435  | 0.00347 | 1.52E-35  | DIP2A     | 21:47959698 | Erythrocytes                       |
| ALDH5A1 | 6:24493922   | 0.204   | 0.00794 | 1.35E-137 | DIP2A     | 21:47960493 | Interferon response/Anti-bacterial |
| ALDH8A1 | 6:135271946  | 0.0483  | 0.00289 | 3.58E-61  | DLG2      | 11:84086900 | CD4+ T-Cells                       |

|         |              |         |         |           |         |              |                                    |
|---------|--------------|---------|---------|-----------|---------|--------------|------------------------------------|
| ALDH9A1 | 1:165667781  | 0.0528  | 0.00435 | 2.01E-33  | DLG2    | 11:84018349  | Erythrocytes                       |
| ALDOB   | 9:104177498  | 0.0399  | 0.00312 | 6.43E-37  | DLG2    | 11:84018349  | Monocytes / Macrophages            |
| ALDOC   | 17:26947652  | 0.0431  | 0.00513 | 5.76E-17  | DLG2    | 11:83935158  | Neutrophils 1                      |
| ALG11   | 13:52576498  | 0.0375  | 0.00379 | 8.47E-23  | DLG2    | 11:83823752  | Neutrophils 10                     |
| ALG6    | 1:63856651   | -0.0502 | 0.00477 | 1.00E-25  | DLG2    | 11:84202384  | Neutrophils 2                      |
| ALG8    | 11:77777384  | -0.0508 | 0.00467 | 2.67E-27  | DNAJC15 | 13:43612736  | Interferon response/Anti-bacterial |
| ALKBH1  | 14:78134243  | -0.0376 | 0.00528 | 1.11E-12  | DNMBP   | 10:101656449 | Monocytes / Macrophages            |
| ALKBH3  | 11:43947597  | -0.0598 | 0.00389 | 2.59E-52  | DOCK5   | 8:25248714   | Erythrocytes                       |
| ALKBH4  | 7:102065322  | 0.108   | 0.00667 | 1.28E-57  | DOCK5   | 8:25248714   | Monocytes / Macrophages            |
| ALKBH5  | 17:18127914  | 0.0201  | 0.00245 | 2.62E-16  | DOCK7   | 1:63070537   | Interferon response/Anti-bacterial |
| ALKBH8  | 11:107400136 | -0.0662 | 0.00488 | 2.61E-41  | DR1     | 1:93820575   | Interferon response/Anti-bacterial |
| ALMS1   | 2:73613341   | -0.0915 | 0.00355 | 3.30E-138 | DSP     | 6:7495948    | Interferon response/Anti-bacterial |
| ALMS1P  | 2:73837751   | -0.0283 | 0.00359 | 3.79E-15  | DSP     | 6:7495948    | Monocytes / Macrophages            |
| ALOX15  | 17:4568742   | 0.59    | 0.0189  | 5.41E-197 | DZIP3   | 3:108264948  | Interferon response/Anti-bacterial |
| ALOX5   | 10:45915941  | 0.0309  | 0.00432 | 1.00E-12  | DZIP3   | 3:108350397  | NK cells / CD8+ T-Cells            |
| ALOX5AP | 13:31312178  | -0.158  | 0.0057  | 1.76E-158 | ECM2    | 9:95207806   | Interferon response/Anti-bacterial |
| ALPK1   | 4:113205543  | 0.0657  | 0.00572 | 3.73E-30  | EFCAB13 | 17:45364390  | Interferon response/Anti-bacterial |
| ALPL    | 1:21896925   | 0.0489  | 0.00766 | 1.76E-10  | EFCAB13 | 17:45386412  | Monocytes / Macrophages            |
| ALS2    | 2:202639198  | 0.13    | 0.00393 | 1.35E-218 | EFCAB2  | 1:245211973  | Interferon response/Anti-bacterial |
| ALS2CR8 | 2:203733989  | 0.0639  | 0.00508 | 8.68E-36  | EGR2    | 10:64533848  | Erythrocytes                       |
| AMACR   | 5:33996456   | -0.11   | 0.00434 | 1.38E-133 | ENC1    | 5:73937854   | Interferon response/Anti-bacterial |
| AMDHD1  | 12:96344495  | 0.0704  | 0.00302 | 2.33E-114 | ENC1    | 5:73946488   | Monocytes / Macrophages            |
| AMFR    | 16:56428427  | -0.0334 | 0.00472 | 1.68E-12  | ENC1    | 5:73943431   | Unknown                            |
| AMICA1  | 11:118072373 | 0.0871  | 0.00418 | 1.04E-92  | ENPP2   | 8:120656832  | Monocytes / Macrophages            |
| AMIGO2  | 12:47473342  | 0.059   | 0.00492 | 1.07E-32  | EPB41L2 | 6:131394493  | Monocytes / Macrophages            |
| AMPD3   | 11:10531025  | -0.0319 | 0.00451 | 1.74E-12  | ERAP2   | 5:96273033   | Erythrocytes                       |
| AMPH    | 7:38388163   | 0.0242  | 0.00268 | 2.17E-19  | ERAP2   | 5:96252589   | Interferon response/Anti-bacterial |
| AMT     | 3:49453834   | -0.0362 | 0.00293 | 1.49E-34  | ERAP2   | 5:96252432   | NK cells / CD8+ T-Cells            |
| AMY2B   | 1:104128773  | 0.157   | 0.0115  | 8.96E-42  | ERO1L   | 14:53160317  | Interferon response/Anti-bacterial |
| AMZ2    | 17:66253696  | 0.036   | 0.00398 | 2.15E-19  | ETV7    | 6:36315002   | B-cells                            |
| AMZ2P1  | 17:62985398  | -0.197  | 0.00775 | 7.09E-135 | ETV7    | 6:36315002   | Neutrophils 1                      |
| ANAPC13 | 3:134191880  | 0.0817  | 0.0061  | 3.19E-40  | ETV7    | 6:36315002   | Unknown                            |
| ANAPC15 | 11:71812592  | 0.042   | 0.00579 | 4.77E-13  | EYA3    | 1:28416157   | Interferon response/Anti-bacterial |
| ANAPC4  | 4:25397036   | 0.0545  | 0.00544 | 2.06E-23  | F2RL1   | 5:76135511   | Interferon response/Anti-bacterial |
| ANG     | 14:21153616  | 0.0698  | 0.00369 | 3.85E-77  | FADS2   | 11:61556039  | Interferon response/Anti-bacterial |
| ANGEL1  | 14:77284416  | 0.0194  | 0.00295 | 4.90E-11  | FADS2   | 11:61547068  | NK cells / CD8+ T-Cells            |
| ANGEL2  | 1:213192458  | 0.0457  | 0.0034  | 1.24E-40  | FAM117B | 2:203505015  | Monocytes / Macrophages            |
| ANGPT1  | 8:108554458  | 0.101   | 0.0069  | 5.94E-48  | FAM118A | 22:45714489  | CD4+ T-Cells                       |
| ANGPT2  | 8:6340423    | -0.111  | 0.0135  | 1.97E-16  | FAM118A | 22:45731050  | Erythrocytes                       |

|            |              |         |         |           |            |              |                                    |
|------------|--------------|---------|---------|-----------|------------|--------------|------------------------------------|
| ANGPTL2    | 9:129814065  | 0.0459  | 0.00343 | 3.41E-40  | FAM118A    | 22:45731731  | Interferon response/Anti-bacterial |
| ANGPTL3    | 1:63018987   | 0.0318  | 0.00472 | 1.73E-11  | FAM118A    | 22:45726345  | Monocytes / Macrophages            |
| ANK1       | 8:41506152   | 0.044   | 0.00721 | 1.15E-09  | FAM118A    | 22:45745439  | Neutrophils 1                      |
| ANK3       | 10:62488381  | 0.162   | 0.00506 | 3.38E-206 | FAM118A    | 22:45771974  | NK cells / CD8+ T-Cells            |
| ANKDD1A    | 15:65163664  | -0.113  | 0.00275 | <1.0E-314 | FAM134A    | 2:220035581  | NK cells / CD8+ T-Cells            |
| ANKH       | 5:14872689   | 0.169   | 0.00635 | 3.72E-146 | FAM3B      | 21:42689637  | Erythrocytes                       |
| ANKMY1     | 2:241481778  | -0.0553 | 0.00312 | 4.95E-68  | FAM3B      | 21:42690424  | Interferon response/Anti-bacterial |
| ANKRA2     | 5:72894812   | 0.0596  | 0.00439 | 2.53E-41  | FAM3B      | 21:42690424  | Monocytes / Macrophages            |
| ANKRD10    | 13:111547103 | 0.0741  | 0.00325 | 8.05E-110 | FAM3B      | 21:42697714  | NK cells / CD8+ T-Cells            |
| ANKRD12    | 18:9109484   | -0.0276 | 0.00399 | 4.65E-12  | FAM3B      | 21:42690424  | Unknown                            |
| ANKRD13D   | 11:67021532  | -0.0915 | 0.0152  | 1.86E-09  | FAN1       | 15:31157666  | Interferon response/Anti-bacterial |
| ANKRD18DP  | 3:197814108  | 0.0376  | 0.00551 | 1.02E-11  | FARP1      | 13:98945248  | Erythrocytes                       |
| ANKRD26    | 10:27436566  | -0.152  | 0.0098  | 4.46E-53  | FBN2       | 5:127851383  | Interferon response/Anti-bacterial |
| ANKRD27    | 19:33143605  | -0.177  | 0.0127  | 2.73E-43  | FBN2       | 5:127812816  | Monocytes / Macrophages            |
| ANKRD28    | 3:15694630   | -0.188  | 0.00742 | 3.32E-133 | FBXW8      | 12:117309440 | Unknown                            |
| ANKRD32    | 5:94043608   | 0.181   | 0.0109  | 3.09E-60  | FCN1       | 9:137798445  | Interferon response/Anti-bacterial |
| ANKRD34B   | 5:79905411   | 0.257   | 0.00705 | 1.98E-259 | FCRL2      | 1:157767519  | Neutrophils 1                      |
| ANKRD36B   | 2:98086584   | 0.399   | 0.0336  | 4.84E-32  | FCRL3      | 1:157603186  | Erythrocytes                       |
| ANKRD36BP1 | 1:168234645  | 0.0477  | 0.0059  | 8.10E-16  | FCRL5      | 1:157554177  | Erythrocytes                       |
| ANKRD40    | 17:48767431  | 0.0283  | 0.00478 | 3.22E-09  | FCRL5      | 1:157536682  | Interferon response/Anti-bacterial |
| ANKRD44    | 2:198175179  | 0.0183  | 0.00311 | 4.14E-09  | FCRL5      | 1:157526021  | Monocytes / Macrophages            |
| ANKRD5     | 20:10015729  | 0.147   | 0.0055  | 2.49E-148 | FDFT1      | 8:11650918   | Interferon response/Anti-bacterial |
| ANKRD50    | 4:125576279  | 0.114   | 0.0106  | 1.22E-26  | FDFT1      | 8:11660614   | NK cells / CD8+ T-Cells            |
| ANKRD55    | 5:55444683   | 0.189   | 0.0113  | 2.96E-61  | FGFR2      | 10:123210812 | Interferon response/Anti-bacterial |
| ANKS1A     | 6:34856345   | -0.0292 | 0.00381 | 2.44E-14  | FGFR2      | 10:123211880 | Neutrophils 10                     |
| ANO5       | 11:22231413  | -0.0972 | 0.00446 | 5.22E-101 | FHDC1      | 4:153893002  | CD4+ T-Cells                       |
| ANP32B     | 9:100763890  | 0.0437  | 0.00735 | 2.94E-09  | FLCN       | 17:17189404  | NK cells / CD8+ T-Cells            |
| ANP32E     | 1:150165849  | 0.11    | 0.00642 | 1.75E-64  | FLNB       | 3:57948942   | Neutrophils 10                     |
| ANPEP      | 15:90363995  | 0.271   | 0.00743 | 1.01E-259 | FLVCR1-AS1 | 1:213039536  | Interferon response/Anti-bacterial |
| ANTXR2     | 4:80821935   | 0.064   | 0.00466 | 4.29E-42  | FMO3       | 1:171132137  | Erythrocytes                       |
| ANXA1      | 9:75765478   | -0.128  | 0.00814 | 9.41E-55  | FMO3       | 1:171132137  | Monocytes / Macrophages            |
| ANXA11     | 10:81920010  | -0.041  | 0.00394 | 4.02E-25  | FMO3       | 1:171132137  | Neutrophils 1                      |
| ANXA2      | 15:60689877  | -0.0494 | 0.00556 | 7.90E-19  | FMOD       | 1:203263699  | Erythrocytes                       |
| ANXA2R     | 5:43039793   | -0.078  | 0.00597 | 1.93E-38  | FMOD       | 1:203263699  | Monocytes / Macrophages            |
| ANXA3      | 4:79473394   | -0.147  | 0.0107  | 2.47E-42  | FNBP1L     | 1:93898666   | Interferon response/Anti-bacterial |
| ANXA4      | 2:69989801   | 0.0803  | 0.00505 | 1.21E-55  | FNDC3B     | 3:171967454  | Erythrocytes                       |
| ANXA5      | 4:122582127  | 0.144   | 0.00527 | 9.16E-154 | FOLR3      | 11:71850156  | Interferon response/Anti-bacterial |
| ANXA6      | 5:150534544  | 0.0828  | 0.0043  | 1.06E-79  | FOLR3      | 11:71864967  | Monocytes / Macrophages            |
| AOAH       | 7:36758237   | -0.158  | 0.00486 | 5.27E-212 | FOLR3      | 11:71870070  | Neutrophils 1                      |

|          |             |         |         |           |           |             |                                    |
|----------|-------------|---------|---------|-----------|-----------|-------------|------------------------------------|
| AP1B1    | 22:29785783 | 0.0302  | 0.00357 | 3.19E-17  | FOLR3     | 11:71895857 | NK cells / CD8+ T-Cells            |
| AP1G1    | 16:71856611 | -0.0201 | 0.00321 | 4.74E-10  | FOXN3-AS2 | 14:90046899 | Interferon response/Anti-bacterial |
| AP1M1    | 19:16321911 | 0.0319  | 0.00347 | 5.79E-20  | FOXP4     | 6:41543584  | Erythrocytes                       |
| AP1M2    | 19:10726288 | 0.0391  | 0.00494 | 2.72E-15  | FPGT      | 1:74666344  | Interferon response/Anti-bacterial |
| AP1S3    | 2:224689805 | -0.077  | 0.00558 | 1.51E-42  | FPR2      | 19:52269634 | Interferon response/Anti-bacterial |
| AP2A2    | 11:1023045  | -0.0805 | 0.0102  | 3.27E-15  | FRA10AC1  | 10:95454768 | Interferon response/Anti-bacterial |
| AP2B1    | 17:33892087 | -0.0514 | 0.00439 | 2.41E-31  | FRK       | 6:116364901 | Erythrocytes                       |
| AP2M1    | 3:183899832 | 0.0776  | 0.00688 | 3.62E-29  | FRK       | 6:116364901 | Monocytes / Macrophages            |
| AP3B1    | 5:77572367  | -0.0397 | 0.00314 | 3.01E-36  | FRMD6     | 14:52238848 | Interferon response/Anti-bacterial |
| AP3B2    | 15:83378248 | -0.0431 | 0.00349 | 1.62E-34  | FUT10     | 8:33348000  | Interferon response/Anti-bacterial |
| AP3M1    | 10:75845885 | -0.06   | 0.00478 | 1.17E-35  | FYB       | 5:39075286  | Erythrocytes                       |
| AP3M2    | 8:42046212  | 0.0402  | 0.00432 | 1.95E-20  | FYN       | 6:112192795 | Erythrocytes                       |
| AP3S2    | 15:90418413 | -0.162  | 0.00499 | 2.60E-210 | FYN       | 6:112190113 | Monocytes / Macrophages            |
| AP4B1    | 1:114425426 | 0.0438  | 0.00406 | 6.00E-27  | FYN       | 6:112190113 | Neutrophils 2                      |
| AP4E1    | 15:51286576 | -0.0903 | 0.0039  | 3.40E-113 | GAB1      | 4:144362114 | Erythrocytes                       |
| AP4M1    | 7:99685218  | -0.0242 | 0.00266 | 1.19E-19  | GAB1      | 4:144362114 | Monocytes / Macrophages            |
| AP5M1    | 14:57758539 | 0.0455  | 0.0076  | 2.33E-09  | GAB1      | 4:144362114 | Neutrophils 1                      |
| APAF1    | 12:99032580 | -0.0742 | 0.00452 | 2.89E-59  | GABRB2    | 5:160694519 | Erythrocytes                       |
| APBA2    | 15:29214522 | -0.0678 | 0.00858 | 3.30E-15  | GABRB2    | 5:160961303 | Monocytes / Macrophages            |
| APBB1IP  | 10:26733355 | -0.079  | 0.00405 | 5.66E-82  | GABRB2    | 5:160974394 | Neutrophils 1                      |
| APBB2    | 4:41216190  | -0.091  | 0.00376 | 5.21E-123 | GALNT2    | 1:230199116 | CD4+ T-Cells                       |
| APC      | 5:112089480 | -0.0357 | 0.0035  | 3.20E-24  | GATAD2A   | 19:19577215 | Interferon response/Anti-bacterial |
| APCDD1   | 18:10430913 | 0.0279  | 0.00415 | 1.97E-11  | GATAD2A   | 19:19577215 | NK cells / CD8+ T-Cells            |
| APH1B    | 15:63595878 | -0.0974 | 0.0115  | 3.29E-17  | GBAP1     | 1:155201993 | Interferon response/Anti-bacterial |
| API5     | 11:43338968 | 0.0384  | 0.00549 | 2.86E-12  | GBP4      | 1:89622030  | Neutrophils 1                      |
| APIP     | 11:34862466 | -0.69   | 0.0134  | <1.0E-314 | GCC2      | 2:109048620 | Interferon response/Anti-bacterial |
| APMAP    | 20:24909945 | 0.129   | 0.00695 | 6.90E-75  | GCOM1     | 15:57855760 | Interferon response/Anti-bacterial |
| APOA2    | 1:161178684 | -0.0641 | 0.00496 | 1.22E-37  | GDA       | 9:74815519  | Erythrocytes                       |
| APOBEC3A | 22:39358037 | 0.38    | 0.0238  | 3.15E-56  | GDA       | 9:74815519  | Interferon response/Anti-bacterial |
| APOBEC3B | 22:39435855 | 0.123   | 0.00805 | 2.61E-51  | GGTA1P    | 9:124273207 | Interferon response/Anti-bacterial |
| APOBEC3D | 22:39475964 | 0.0263  | 0.00384 | 8.62E-12  | GLT25D2   | 1:183935353 | Erythrocytes                       |
| APOBEC3G | 22:39484178 | 0.138   | 0.00879 | 5.61E-54  | GLT25D2   | 1:183939926 | Interferon response/Anti-bacterial |
| APOBEC3H | 22:39496902 | 0.137   | 0.0105  | 1.40E-38  | GLYATL2   | 11:58626373 | Erythrocytes                       |
| APOBEC4  | 1:183581965 | -0.0434 | 0.00565 | 1.72E-14  | GLYATL2   | 11:58638918 | Interferon response/Anti-bacterial |
| APOBR    | 16:28473465 | -2.69   | 0.0394  | <1.0E-314 | GM2A      | 5:150618993 | Interferon response/Anti-bacterial |
| APOC4    | 19:45444646 | -0.047  | 0.00661 | 1.33E-12  | GNAO1     | 16:56406635 | Erythrocytes                       |
| APOL2    | 22:36623148 | -0.0531 | 0.00436 | 9.96E-34  | GNRHR     | 4:68606934  | Interferon response/Anti-bacterial |
| APOL3    | 22:36540434 | 0.0485  | 0.00415 | 3.45E-31  | GPM6A     | 4:176856505 | Erythrocytes                       |
| APP      | 21:27503527 | -0.0439 | 0.00448 | 1.52E-22  | GPM6A     | 4:176856505 | Monocytes / Macrophages            |



|           |              |         |         |           |           |              |                                    |
|-----------|--------------|---------|---------|-----------|-----------|--------------|------------------------------------|
| APPL2     | 12:105659782 | -0.0454 | 0.00306 | 7.55E-49  | GPM6A     | 4:176856505  | Neutrophils 1                      |
| APRT      | 16:88883288  | 0.145   | 0.0232  | 4.33E-10  | GPR128    | 3:100344099  | Erythrocytes                       |
| APTX      | 9:33025113   | -0.0335 | 0.00352 | 2.99E-21  | GPR128    | 3:100344099  | Interferon response/Anti-bacterial |
| AQP10     | 1:154293923  | -0.0672 | 0.0114  | 3.90E-09  | GPR180    | 13:95266244  | Interferon response/Anti-bacterial |
| AQP11     | 11:77369051  | 0.0432  | 0.00681 | 2.47E-10  | GPX4      | 19:1118774   | NK cells / CD8+ T-Cells            |
| AQP3      | 9:33442986   | -0.05   | 0.00444 | 4.56E-29  | GRAMD1B   | 11:123514504 | B-cells                            |
| AQR       | 15:35119748  | 0.0195  | 0.00285 | 9.49E-12  | GRAMD1B   | 11:123514504 | Interferon response/Anti-bacterial |
| ARAP1     | 11:72405450  | 0.0365  | 0.00416 | 2.66E-18  | GRAMD1B   | 11:123514504 | Neutrophils 1                      |
| ARAP3     | 5:141059158  | 0.0918  | 0.00547 | 1.46E-61  | GSDMB     | 17:38026169  | Interferon response/Anti-bacterial |
| ARF3      | 12:49351572  | 0.0723  | 0.00603 | 1.04E-32  | GSTM3     | 1:110299052  | Interferon response/Anti-bacterial |
| ARFGAP2   | 11:47188411  | -0.0287 | 0.00334 | 1.17E-17  | GSTM4     | 1:110198727  | Interferon response/Anti-bacterial |
| ARFGAP3   | 22:43197897  | 0.0531  | 0.00448 | 4.64E-32  | GSTM4     | 1:110175028  | Neutrophils 10                     |
| ARFIP1    | 4:153681139  | -0.222  | 0.00545 | <1.0E-314 | GSTP1     | 11:67352689  | Interferon response/Anti-bacterial |
| ARG1      | 6:131898208  | 0.303   | 0.0116  | 2.77E-142 | GSTT1     | 22:24366728  | Interferon response/Anti-bacterial |
| ARHGAP11A | 15:32907712  | 0.164   | 0.0146  | 4.61E-29  | GUSBP5    | 4:144444995  | Interferon response/Anti-bacterial |
| ARHGAP12  | 10:32247294  | 0.0831  | 0.00463 | 7.92E-70  | HAUS4     | 14:23401441  | Interferon response/Anti-bacterial |
| ARHGAP15  | 2:143884297  | 0.125   | 0.00705 | 1.01E-68  | HBZ       | 16:207611    | Interferon response/Anti-bacterial |
| ARHGAP19  | 10:99014575  | -0.406  | 0.0136  | 7.76E-181 | HBZ       | 16:209950    | NK cells / CD8+ T-Cells            |
| ARHGAP22  | 10:49822957  | 0.0185  | 0.00294 | 3.81E-10  | HEATR6    | 17:58160568  | Interferon response/Anti-bacterial |
| ARHGAP24  | 4:86590848   | 0.142   | 0.00728 | 2.28E-81  | HERC2     | 15:28377772  | Erythrocytes                       |
| ARHGAP25  | 2:69039254   | -0.0269 | 0.00383 | 2.28E-12  | HERC2     | 15:28530359  | Interferon response/Anti-bacterial |
| ARHGAP26  | 5:142420072  | -0.0792 | 0.00762 | 4.47E-25  | HHAT      | 1:210820727  | Erythrocytes                       |
| ARHGAP27  | 17:43551151  | -0.03   | 0.00501 | 2.40E-09  | HHAT      | 1:210842361  | Monocytes / Macrophages            |
| ARHGAP30  | 1:161026490  | -0.0221 | 0.00296 | 8.88E-14  | HIATL1    | 9:97201550   | Interferon response/Anti-bacterial |
| ARHGAP32  | 11:129108747 | 0.0265  | 0.00404 | 5.91E-11  | HIST1H2BF | 6:26204506   | Interferon response/Anti-bacterial |
| ARHGAP5   | 14:32592464  | -0.0426 | 0.00726 | 4.72E-09  | HIST1H3E  | 6:26208342   | Interferon response/Anti-bacterial |
| ARHGAP9   | 12:57907769  | 0.147   | 0.00819 | 1.35E-69  | HIST1H3E  | 6:26208342   | Monocytes / Macrophages            |
| ARHGEF10  | 8:1807449    | -0.0649 | 0.00353 | 4.14E-73  | HIST1H3E  | 6:26208641   | Unknown                            |
| ARHGEF11  | 1:157005996  | -0.0335 | 0.0041  | 3.69E-16  | HIST1H4L  | 6:27810699   | B-cells                            |
| ARHGEF19  | 1:16533830   | -0.0155 | 0.00255 | 1.32E-09  | HLA-B     | 6:31325235   | Interferon response/Anti-bacterial |
| ARHGEF26  | 3:153962525  | -0.0395 | 0.00374 | 6.90E-26  | HLA-DOB   | 6:32796857   | Interferon response/Anti-bacterial |
| ARHGEF3   | 3:56758448   | -0.058  | 0.00553 | 1.74E-25  | HLA-DOB   | 6:32743835   | Monocytes / Macrophages            |
| ARHGEF35  | 7:143858397  | 0.0576  | 0.00792 | 4.32E-13  | HLA-DPA1  | 6:33035436   | Interferon response/Anti-bacterial |
| ARHGEF40  | 14:21550499  | -0.0691 | 0.00567 | 9.03E-34  | HLA-DPB1  | 6:33052382   | Interferon response/Anti-bacterial |
| ARHGEF7   | 13:111805525 | 0.0302  | 0.003   | 1.24E-23  | HLA-DPB1  | 6:33048686   | Unknown                            |
| ARID1B    | 6:157161912  | 0.0273  | 0.004   | 1.03E-11  | HLA-DQA2  | 6:32668100   | Interferon response/Anti-bacterial |
| ARID3B    | 15:74851416  | 0.0411  | 0.00567 | 4.84E-13  | HLA-DRB1  | 6:32577385   | Interferon response/Anti-bacterial |
| ARID4B    | 1:235491823  | -0.0348 | 0.0054  | 1.20E-10  | HLA-DRB1  | 6:32577442   | Monocytes / Macrophages            |
| ARID5A    | 2:97201682   | -0.0136 | 0.00216 | 3.09E-10  | HLA-DRB1  | 6:32574250   | Neutrophils 10                     |

|           |              |         |         |           |           |              |                                    |
|-----------|--------------|---------|---------|-----------|-----------|--------------|------------------------------------|
| ARL11     | 13:50209351  | 0.045   | 0.00547 | 2.21E-16  | HLA-DRB1  | 6:32572461   | NK cells / CD8+ T-Cells            |
| ARL13B    | 3:93672516   | -0.0343 | 0.00406 | 3.98E-17  | HLA-DRB5  | 6:32438783   | Interferon response/Anti-bacterial |
| ARL15     | 5:53606295   | -0.305  | 0.00773 | 2.47E-298 | HLA-DRB5  | 6:32438783   | Monocytes / Macrophages            |
| ARL17A    | 17:44603035  | -0.377  | 0.0434  | 4.11E-18  | HLA-DRB5  | 6:32438783   | NK cells / CD8+ T-Cells            |
| ARL4A     | 7:12730362   | 0.0608  | 0.00712 | 1.73E-17  | HP        | 16:72105084  | Interferon response/Anti-bacterial |
| ARL4C     | 2:235402656  | 0.0471  | 0.00473 | 4.17E-23  | HPS1      | 10:100217808 | NK cells / CD8+ T-Cells            |
| ARL5B     | 10:18964097  | -0.0666 | 0.00888 | 7.54E-14  | HSD17B13  | 4:88231392   | Interferon response/Anti-bacterial |
| ARL6IP1   | 16:18784310  | 0.0932  | 0.0104  | 4.08E-19  | HSD17B13  | 4:88231865   | Unknown                            |
| ARL6IP5   | 3:69153854   | 0.0281  | 0.00347 | 6.42E-16  | HSD17B7P2 | 10:38681389  | Interferon response/Anti-bacterial |
| ARL6IP6   | 2:153586899  | 0.0449  | 0.00523 | 1.25E-17  | IGFBP4    | 17:38639764  | Erythrocytes                       |
| ARMC1     | 8:66555467   | 0.0934  | 0.00459 | 9.17E-89  | IGFBP4    | 17:38639764  | Monocytes / Macrophages            |
| ARMC3     | 10:23181000  | 0.0609  | 0.00444 | 4.10E-42  | IGFBP4    | 17:38641599  | Neutrophils 1                      |
| ARNT      | 1:150772613  | -0.0719 | 0.00512 | 6.35E-44  | IL18RAP   | 2:102991213  | Erythrocytes                       |
| ARNTL     | 11:13294268  | 0.105   | 0.00425 | 1.98E-128 | IL18RAP   | 2:103032180  | Interferon response/Anti-bacterial |
| ARPC1B    | 7:98978755   | -0.0301 | 0.0048  | 3.75E-10  | IL18RAP   | 2:102991191  | NK cells / CD8+ T-Cells            |
| ARPC2     | 2:219105450  | -0.0339 | 0.00257 | 3.89E-39  | IL1RN     | 2:113863271  | Neutrophils 1                      |
| ARPC5     | 1:183593512  | -0.0494 | 0.0025  | 9.29E-84  | IL4R      | 16:27285997  | Erythrocytes                       |
| ARPP19    | 15:52854832  | 0.0751  | 0.00563 | 6.12E-40  | IL4R      | 16:27395898  | Monocytes / Macrophages            |
| ARRB1     | 11:75075038  | 0.0679  | 0.0065  | 2.79E-25  | IL7       | 8:79743403   | Monocytes / Macrophages            |
| ARRB2     | 17:4600510   | -0.168  | 0.007   | 1.49E-120 | IL7R      | 5:35856630   | Interferon response/Anti-bacterial |
| ARRDC1    | 9:140533378  | -0.0385 | 0.00495 | 9.16E-15  | IL7R      | 5:35906488   | Monocytes / Macrophages            |
| ARSB      | 5:78281977   | 0.0961  | 0.0047  | 2.16E-89  | INPP4A    | 2:99122921   | Erythrocytes                       |
| ARSG      | 17:66413539  | 0.0336  | 0.00361 | 1.81E-20  | INPP4A    | 2:99122921   | Monocytes / Macrophages            |
| ARV1      | 1:231101943  | 0.057   | 0.00525 | 3.19E-27  | INPP4B    | 4:143290182  | Monocytes / Macrophages            |
| AS3MT     | 10:104611764 | 0.24    | 0.00581 | <1.0E-314 | INPP5F    | 10:121556259 | Erythrocytes                       |
| ASAH1     | 8:17923339   | -0.112  | 0.00373 | 4.75E-182 | INPP5F    | 10:121555618 | Monocytes / Macrophages            |
| ASAP1     | 8:131269886  | 0.0855  | 0.00513 | 9.08E-61  | INPP5F    | 10:121545752 | Neutrophils 1                      |
| ASAP1-IT1 | 8:131270076  | -0.0739 | 0.00517 | 1.79E-45  | IRF4      | 6:403544     | Erythrocytes                       |
| ASB13     | 10:5688795   | 0.0505  | 0.00412 | 3.82E-34  | ISCA1     | 9:88947254   | Interferon response/Anti-bacterial |
| ASB14     | 3:57321433   | -0.0716 | 0.00691 | 5.95E-25  | ITGA4     | 2:182425330  | Erythrocytes                       |
| ASB16-AS1 | 17:42239349  | -0.0717 | 0.00619 | 1.04E-30  | ITGA4     | 2:182425330  | Monocytes / Macrophages            |
| ASB3      | 2:53955513   | 0.0378  | 0.00383 | 7.72E-23  | ITGA6     | 2:173417021  | Monocytes / Macrophages            |
| ASB7      | 15:101176989 | 0.0448  | 0.00605 | 1.62E-13  | ITGAX     | 16:31377113  | Interferon response/Anti-bacterial |
| ASB8      | 12:48578809  | 0.0381  | 0.00559 | 1.00E-11  | ITLN1     | 1:160827838  | NK cells / CD8+ T-Cells            |
| ASCC1     | 10:74025656  | -0.207  | 0.0183  | 2.72E-29  | ITSN1     | 21:35029572  | Interferon response/Anti-bacterial |
| ASCC2     | 22:30220190  | 0.0675  | 0.00818 | 1.87E-16  | JUP       | 17:39946867  | Interferon response/Anti-bacterial |
| ASCC3     | 6:101328762  | -0.0528 | 0.00632 | 7.64E-17  | JUP       | 17:39947206  | NK cells / CD8+ T-Cells            |
| ASF1A     | 6:119178035  | -0.0509 | 0.00696 | 2.93E-13  | KCNJ15    | 21:39594637  | Interferon response/Anti-bacterial |
| ASGR2     | 17:7015711   | -0.11   | 0.00581 | 8.91E-78  | KCNMA1    | 10:79246201  | Monocytes / Macrophages            |

|         |             |         |         |           |           |              |                                    |
|---------|-------------|---------|---------|-----------|-----------|--------------|------------------------------------|
| ASL     | 7:65595217  | 0.025   | 0.00246 | 4.59E-24  | KCNMA1    | 10:79322102  | Unknown                            |
| ASNS    | 7:97515313  | -0.237  | 0.018   | 4.25E-39  | KCNQ5     | 6:73957218   | Erythrocytes                       |
| ASNSD1  | 2:190505697 | 0.184   | 0.00442 | <1.0E-314 | KHDRBS2   | 6:62851443   | Erythrocytes                       |
| ASPDH   | 19:50973259 | -0.0461 | 0.0039  | 5.85E-32  | KIAA0040  | 1:175132938  | Interferon response/Anti-bacterial |
| ASPH    | 8:62644645  | -0.209  | 0.00839 | 3.91E-129 | KIAA0226L | 13:46936789  | Erythrocytes                       |
| ASPN    | 9:95172242  | -0.203  | 0.00534 | 4.99E-280 | KIAA0226L | 13:46905723  | Neutrophils 1                      |
| ASPRV1  | 2:70207897  | 0.065   | 0.00715 | 1.42E-19  | KIAA0391  | 14:35561440  | Interferon response/Anti-bacterial |
| ASRGL1  | 11:62087343 | -0.18   | 0.00722 | 1.36E-129 | KIAA0391  | 14:35602567  | Monocytes / Macrophages            |
| ASUN    | 12:27054552 | -0.0237 | 0.00392 | 1.60E-09  | KIAA0391  | 14:35602087  | Unknown                            |
| ATAD5   | 17:29177841 | -0.107  | 0.00808 | 4.47E-39  | KIAA1324  | 1:109706393  | Erythrocytes                       |
| ATF1    | 12:51202554 | -0.064  | 0.00832 | 1.79E-14  | KIAA1324  | 1:109706880  | Interferon response/Anti-bacterial |
| ATF6    | 1:161835754 | -0.0751 | 0.0071  | 7.10E-26  | KIAA1324  | 1:109708064  | Monocytes / Macrophages            |
| ATF7    | 12:54057912 | 0.0268  | 0.00406 | 4.89E-11  | KIAA1324  | 1:109706393  | NK cells / CD8+ T-Cells            |
| ATF7IP2 | 16:10455828 | 0.193   | 0.00831 | 1.60E-113 | KIAA1598  | 10:118712455 | Interferon response/Anti-bacterial |
| ATG10   | 5:81299921  | 0.273   | 0.0105  | 1.77E-141 | KIF16B    | 20:16552181  | Interferon response/Anti-bacterial |
| ATG16L1 | 2:234147930 | -0.0277 | 0.0036  | 1.61E-14  | KIF16B    | 20:16545368  | Monocytes / Macrophages            |
| ATG5    | 6:106631860 | 0.0641  | 0.00573 | 1.02E-28  | KIF1B     | 1:10271688   | Interferon response/Anti-bacterial |
| ATG7    | 3:11294310  | 0.063   | 0.00379 | 1.35E-60  | KRT23     | 17:39092063  | Interferon response/Anti-bacterial |
| ATIC    | 2:216181279 | -0.0644 | 0.00397 | 1.14E-57  | L3MBTL3   | 6:130374461  | Interferon response/Anti-bacterial |
| ATL1    | 14:51072713 | -0.0292 | 0.00415 | 2.49E-12  | LAMC1     | 1:182963380  | Erythrocytes                       |
| ATL2    | 2:38505813  | 0.0295  | 0.00504 | 4.95E-09  | LAMP3     | 3:182869163  | B-cells                            |
| ATL3    | 11:63463937 | 0.0661  | 0.00951 | 4.05E-12  | LAMP3     | 3:182861353  | Neutrophils 1                      |
| ATMIN   | 16:81069317 | -0.08   | 0.0102  | 4.92E-15  | LBH       | 2:30509158   | NK cells / CD8+ T-Cells            |
| ATOX1   | 5:151128214 | 0.0296  | 0.00474 | 4.47E-10  | LCA5L     | 21:40766048  | Interferon response/Anti-bacterial |
| ATP10A  | 15:26075917 | -0.0444 | 0.00322 | 1.41E-42  | LCLAT1    | 2:30676422   | Interferon response/Anti-bacterial |
| ATP10D  | 4:47442361  | 0.0576  | 0.00399 | 2.58E-46  | LGALS2    | 22:37970808  | Interferon response/Anti-bacterial |
| ATP11B  | 3:182575631 | 0.0857  | 0.00508 | 3.00E-62  | LGALS2    | 22:37970866  | Monocytes / Macrophages            |
| ATP13A3 | 3:194237025 | 0.113   | 0.00932 | 1.73E-33  | LINC00339 | 1:22355289   | Interferon response/Anti-bacterial |
| ATP13A4 | 3:193300315 | 0.0835  | 0.00283 | 2.91E-177 | LIPA      | 10:91011681  | Interferon response/Anti-bacterial |
| ATP1A4  | 1:160136208 | -0.0456 | 0.00357 | 9.52E-37  | LIX1      | 5:96425293   | Monocytes / Macrophages            |
| ATP1B1  | 1:169079268 | -0.128  | 0.00816 | 2.18E-54  | LOC654433 | 2:113981137  | Interferon response/Anti-bacterial |
| ATP1B3  | 3:141645747 | 0.0372  | 0.00569 | 6.58E-11  | LOXHD1    | 18:44165341  | Interferon response/Anti-bacterial |
| ATP2A3  | 17:3862165  | 0.0533  | 0.00874 | 1.18E-09  | LOXHD1    | 18:44165341  | Unknown                            |
| ATP2C2  | 16:84414164 | -0.0271 | 0.00229 | 5.06E-32  | LPL       | 8:19843930   | Erythrocytes                       |
| ATP5A1  | 18:43714920 | -0.131  | 0.017   | 1.68E-14  | LPL       | 8:19860197   | Monocytes / Macrophages            |
| ATP5C1  | 10:7830064  | -0.103  | 0.0047  | 3.73E-102 | LRRC16A   | 6:25398426   | Interferon response/Anti-bacterial |
| ATP5F1  | 1:111968710 | -0.102  | 0.0101  | 1.55E-23  | LRRC6     | 8:133718548  | Interferon response/Anti-bacterial |
| ATP5G2  | 12:54087705 | -0.032  | 0.00523 | 1.05E-09  | LRRC6     | 8:133715804  | NK cells / CD8+ T-Cells            |
| ATP5G3  | 2:176042819 | -0.0413 | 0.005   | 1.78E-16  | LRRC8B    | 1:90031987   | Interferon response/Anti-bacterial |

|          |              |         |         |           |         |              |                                    |
|----------|--------------|---------|---------|-----------|---------|--------------|------------------------------------|
| ATP5L2   | 22:43046707  | -0.0689 | 0.00966 | 1.13E-12  | LRR8B   | 1:90025981   | Unknown                            |
| ATP5O    | 21:35284683  | 0.24    | 0.0112  | 1.69E-97  | LRRN1   | 3:3831122    | Monocytes / Macrophages            |
| ATP5S    | 14:50789102  | -0.0562 | 0.00332 | 1.09E-62  | LYSMD3  | 5:89814604   | Interferon response/Anti-bacterial |
| ATP5SL   | 19:41906270  | -0.0504 | 0.00397 | 2.21E-36  | LYZ     | 12:69732105  | Interferon response/Anti-bacterial |
| ATP6V0D1 | 16:67549746  | 0.157   | 0.0084  | 2.37E-75  | MACF1   | 1:39952956   | Neutrophils 1                      |
| ATP6V1C1 | 8:104084584  | 0.119   | 0.00633 | 6.76E-76  | MANEA   | 6:96024424   | Interferon response/Anti-bacterial |
| ATP6V1D  | 14:67820457  | -0.121  | 0.0167  | 4.33E-13  | MAP2    | 2:210648810  | Monocytes / Macrophages            |
| ATP6V1E1 | 22:18077640  | 0.194   | 0.00623 | 3.07E-195 | MAP2    | 2:210404154  | Neutrophils 1                      |
| ATP6V1E2 | 2:46738846   | 0.0414  | 0.00467 | 1.02E-18  | MAP2K5  | 15:67865045  | Interferon response/Anti-bacterial |
| ATP7B    | 13:52626337  | 0.0226  | 0.00309 | 2.68E-13  | MASTL   | 10:27474078  | Interferon response/Anti-bacterial |
| ATP8A1   | 4:42676817   | -0.14   | 0.01    | 1.60E-43  | MASTL   | 10:27475444  | Neutrophils 1                      |
| ATP8B1   | 18:55304929  | 0.0281  | 0.00452 | 5.20E-10  | MBD4    | 3:129099921  | Monocytes / Macrophages            |
| ATP8B2   | 1:154313232  | -0.0292 | 0.00422 | 5.16E-12  | MBD4    | 3:129099921  | Neutrophils 1                      |
| ATP8B4   | 15:50157261  | 0.14    | 0.00668 | 2.05E-94  | MDGA1   | 6:37674339   | Interferon response/Anti-bacterial |
| ATP9B    | 18:76812450  | 0.0653  | 0.00336 | 1.41E-81  | MDM2    | 12:69184350  | Interferon response/Anti-bacterial |
| ATPIF1   | 1:28560580   | 0.116   | 0.00373 | 7.79E-194 | MDN1    | 6:90489072   | Neutrophils 1                      |
| ATR      | 3:142340807  | 0.0173  | 0.00284 | 1.29E-09  | MFN2    | 1:12031581   | CD4+ T-Cells                       |
| ATRAID   | 2:27439751   | -0.054  | 0.00677 | 1.85E-15  | MFN2    | 1:12046880   | Interferon response/Anti-bacterial |
| ATRIP    | 3:48484016   | -0.0136 | 0.0023  | 3.83E-09  | MFN2    | 1:12046063   | NK cells / CD8+ T-Cells            |
| ATRN     | 20:3594089   | -0.0204 | 0.00289 | 1.96E-12  | MFSD9   | 2:103347094  | Interferon response/Anti-bacterial |
| ATXN1    | 6:16755768   | 0.0579  | 0.00386 | 1.15E-49  | MFSD9   | 2:103347094  | Monocytes / Macrophages            |
| ATXN10   | 22:46052777  | -0.106  | 0.00449 | 1.21E-116 | MFSD9   | 2:103347857  | Unknown                            |
| ATXN3    | 14:92550658  | 0.129   | 0.0046  | 1.52E-160 | MGAT4A  | 2:99201070   | Monocytes / Macrophages            |
| ATXN7L3B | 12:74946815  | -0.14   | 0.00413 | 2.14E-227 | MGAT4A  | 2:99201070   | Neutrophils 1                      |
| AUH      | 9:94045131   | 0.0456  | 0.00466 | 1.68E-22  | MGST3   | 1:165600267  | Interferon response/Anti-bacterial |
| AUP1     | 2:74729481   | -0.0525 | 0.00586 | 4.51E-19  | MLLT3   | 9:20642438   | Monocytes / Macrophages            |
| AUTS2    | 7:70144841   | -0.052  | 0.00457 | 1.28E-29  | MOV10   | 1:113236087  | Neutrophils 1                      |
| AVIL     | 12:58170335  | -0.072  | 0.00469 | 3.68E-52  | MPZL2   | 11:118126576 | Interferon response/Anti-bacterial |
| AVL9     | 7:32618281   | -0.0334 | 0.00453 | 2.17E-13  | MRE11A  | 11:94232883  | Interferon response/Anti-bacterial |
| AVPR1A   | 12:63541714  | 0.0291  | 0.0046  | 2.84E-10  | MRPL18  | 6:160188891  | Interferon response/Anti-bacterial |
| AXDND1   | 1:179322810  | -0.179  | 0.0151  | 2.90E-32  | MRPL21  | 11:68646845  | Interferon response/Anti-bacterial |
| AXIN1    | 16:407723    | 0.0287  | 0.00273 | 1.11E-25  | MRPS18C | 4:84423038   | Interferon response/Anti-bacterial |
| AXIN2    | 17:63556290  | -0.0636 | 0.0055  | 1.38E-30  | MSH2    | 2:47661644   | Interferon response/Anti-bacterial |
| AZI2     | 3:28332087   | 0.0269  | 0.00409 | 5.05E-11  | MSH3    | 5:79920073   | Interferon response/Anti-bacterial |
| AZIN1    | 8:103817865  | 0.0316  | 0.00403 | 5.32E-15  | MSH3    | 5:79913275   | NK cells / CD8+ T-Cells            |
| B3GALNT1 | 3:160855599  | 0.0265  | 0.00347 | 2.80E-14  | MTPAP   | 10:30653561  | Erythrocytes                       |
| B3GALNT2 | 1:235628908  | 0.2     | 0.00409 | <1.0E-314 | MTPAP   | 10:30647695  | Interferon response/Anti-bacterial |
| B3GAT1   | 11:134268411 | 0.0313  | 0.00482 | 9.48E-11  | MYH11   | 16:15820863  | Interferon response/Anti-bacterial |
| B3GAT2   | 6:71531118   | -0.0342 | 0.00563 | 1.26E-09  | MYH11   | 16:15821246  | NK cells / CD8+ T-Cells            |

|          |              |         |         |           |        |             |                                    |
|----------|--------------|---------|---------|-----------|--------|-------------|------------------------------------|
| B3GAT3   | 11:62424096  | -0.0554 | 0.00931 | 2.80E-09  | MYL6   | 12:56509535 | B-cells                            |
| B3GNT2   | 2:62491643   | 0.106   | 0.00549 | 1.04E-79  | MYL6   | 12:56509535 | Erythrocytes                       |
| B3GNT5   | 3:182925233  | -0.258  | 0.0164  | 2.10E-54  | MYL6   | 12:56509535 | Interferon response/Anti-bacterial |
| B3GNTL1  | 17:81006286  | -0.0391 | 0.00277 | 1.54E-44  | MYL6   | 12:56509535 | Monocytes / Macrophages            |
| B4GALNT3 | 12:662838    | -0.069  | 0.0024  | 3.32E-169 | MYL6   | 12:56509535 | Neutrophils 1                      |
| B4GALT4  | 3:118957370  | -0.174  | 0.00491 | 4.95E-247 | MYL6   | 12:56509535 | Neutrophils 2                      |
| B4GALT6  | 18:29255261  | -0.0432 | 0.00461 | 9.46E-21  | MYL6   | 12:56509535 | Unknown                            |
| BABAM1   | 19:17391787  | -0.0774 | 0.00948 | 4.18E-16  | MYO10  | 5:16875276  | Erythrocytes                       |
| BACE1    | 11:117189216 | 0.0199  | 0.00241 | 1.67E-16  | MYO10  | 5:16875276  | Monocytes / Macrophages            |
| BACE2    | 21:42521213  | 0.0646  | 0.00535 | 3.87E-33  | MYO10  | 5:16872627  | Neutrophils 2                      |
| BACH1    | 21:30706470  | 0.0282  | 0.00398 | 1.64E-12  | MYO1E  | 15:59422810 | Erythrocytes                       |
| BAG3     | 10:121437012 | 0.032   | 0.00356 | 2.99E-19  | MYO1E  | 15:59422810 | Monocytes / Macrophages            |
| BAG5     | 14:104022944 | 0.0376  | 0.00503 | 9.04E-14  | MYO1E  | 15:59422810 | Neutrophils 1                      |
| BAG6     | 6:31594181   | -0.0732 | 0.008   | 7.66E-20  | MYOM2  | 8:2121846   | Interferon response/Anti-bacterial |
| BAHCC1   | 17:79339668  | -0.272  | 0.0382  | 1.22E-12  | NAAA   | 4:76816143  | Interferon response/Anti-bacterial |
| BAI3     | 6:69454400   | 0.0277  | 0.00249 | 2.83E-28  | NAGK   | 2:71294360  | Interferon response/Anti-bacterial |
| BAIAP2   | 17:79015989  | 0.0184  | 0.00307 | 2.39E-09  | NAPG   | 18:10536906 | Interferon response/Anti-bacterial |
| BAIAP2L1 | 7:97942436   | 0.0516  | 0.00368 | 6.18E-44  | NCF2   | 1:183553870 | Erythrocytes                       |
| BAIAP3   | 16:1394741   | 0.0374  | 0.00306 | 5.06E-34  | NDST1  | 5:149862325 | Interferon response/Anti-bacterial |
| BAK1     | 6:33546837   | -0.0755 | 0.00467 | 2.32E-57  | NEBL   | 10:21503412 | Interferon response/Anti-bacterial |
| BARD1    | 2:215673440  | 0.106   | 0.00529 | 4.37E-86  | NECAP2 | 1:16791384  | Interferon response/Anti-bacterial |
| BASP1    | 5:17234578   | -0.0456 | 0.00464 | 1.48E-22  | NETO1  | 18:70477566 | Erythrocytes                       |
| BATF3    | 1:212871081  | 0.0398  | 0.00478 | 1.04E-16  | NFXL1  | 4:47910943  | CD4+ T-Cells                       |
| BAZ2B    | 2:160427646  | -0.145  | 0.00527 | 1.49E-156 | NFXL1  | 4:47888664  | Erythrocytes                       |
| BBS2     | 16:56479298  | 0.219   | 0.00421 | <1.0E-314 | NFXL1  | 4:47858518  | Interferon response/Anti-bacterial |
| BBS4     | 15:72978531  | -0.149  | 0.0127  | 2.02E-31  | NFXL1  | 4:47848377  | Monocytes / Macrophages            |
| BBS9     | 7:33344075   | 0.0705  | 0.00581 | 2.02E-33  | NFXL1  | 4:47862792  | NK cells / CD8+ T-Cells            |
| BBX      | 3:107312676  | 0.0404  | 0.0054  | 8.00E-14  | NFXL1  | 4:47906461  | Unknown                            |
| BCAS4    | 20:49431913  | -0.0402 | 0.00554 | 4.75E-13  | NINL   | 20:25492584 | Erythrocytes                       |
| BCAT1    | 12:25051265  | -0.307  | 0.00623 | <1.0E-314 | NINL   | 20:25492584 | Monocytes / Macrophages            |
| BCKDK    | 16:31162303  | 0.0292  | 0.00409 | 1.11E-12  | NIPAL2 | 8:99305539  | Interferon response/Anti-bacterial |
| BCL2A1   | 15:80263345  | 0.162   | 0.00749 | 7.56E-100 | NME4   | 16:450759   | NK cells / CD8+ T-Cells            |
| BCL2L11  | 2:111896243  | 0.0411  | 0.00686 | 2.27E-09  | NMRK1  | 9:77707695  | Interferon response/Anti-bacterial |
| BCL9     | 1:147020818  | -0.0816 | 0.0107  | 3.01E-14  | NOD2   | 16:50714979 | CD4+ T-Cells                       |
| BCO2     | 11:112049856 | -0.0269 | 0.00353 | 3.09E-14  | NOD2   | 16:50724614 | Interferon response/Anti-bacterial |
| BCR      | 22:23522810  | -0.0205 | 0.0027  | 3.50E-14  | NQO2   | 6:3028028   | Interferon response/Anti-bacterial |
| BDH1     | 3:197273882  | -0.0269 | 0.00428 | 3.73E-10  | NRG1   | 8:32430888  | Interferon response/Anti-bacterial |
| BDH2     | 4:104000973  | -0.152  | 0.00747 | 2.00E-88  | NSD1   | 5:176517058 | Neutrophils 1                      |
| BDP1     | 5:70730687   | -0.111  | 0.0149  | 1.01E-13  | NSG1   | 4:4350655   | Interferon response/Anti-bacterial |

|         |              |         |         |           |         |              |                                    |
|---------|--------------|---------|---------|-----------|---------|--------------|------------------------------------|
| BEGAIN  | 14:101005215 | -0.0319 | 0.00385 | 1.44E-16  | NT5C3L  | 17:39991988  | Interferon response/Anti-bacterial |
| BEND7   | 10:13560871  | 0.052   | 0.00499 | 3.18E-25  | NT5C3L  | 17:39979267  | Monocytes / Macrophages            |
| BET1    | 7:93624179   | 0.0533  | 0.0056  | 2.90E-21  | NUDT12  | 5:102855443  | Interferon response/Anti-bacterial |
| BET1L   | 11:198986    | -0.0925 | 0.00469 | 2.36E-83  | OGN     | 9:95096811   | Interferon response/Anti-bacterial |
| BFAR    | 16:14777006  | 0.031   | 0.00461 | 2.00E-11  | OSBPL10 | 3:31742717   | Erythrocytes                       |
| BFSP1   | 20:17473671  | -0.0274 | 0.00392 | 3.38E-12  | OSBPL10 | 3:31854210   | Monocytes / Macrophages            |
| BHLHE40 | 3:5025654    | 0.0625  | 0.00873 | 8.96E-13  | OSBPL10 | 3:31854210   | Neutrophils 1                      |
| BHMT2   | 5:78434291   | -0.0223 | 0.00376 | 3.17E-09  | OSBPL10 | 3:31854210   | NK cells / CD8+ T-Cells            |
| BICD2   | 9:95508176   | -0.0344 | 0.00356 | 6.37E-22  | P2RX1   | 17:3821967   | Interferon response/Anti-bacterial |
| BID     | 22:18180911  | 0.0174  | 0.00225 | 1.23E-14  | PACS1   | 11:66003843  | Neutrophils 2                      |
| BIN1    | 2:127826533  | -0.0596 | 0.00276 | 2.48E-99  | PADI2   | 1:17425473   | Interferon response/Anti-bacterial |
| BIN2    | 12:51685831  | -0.112  | 0.0066  | 4.87E-63  | PADI2   | 1:17414305   | Monocytes / Macrophages            |
| BIRC2   | 11:102227409 | -0.112  | 0.0112  | 2.28E-23  | PADI2   | 1:17414305   | NK cells / CD8+ T-Cells            |
| BIRC7   | 20:61875007  | -0.0346 | 0.005   | 5.02E-12  | PAM     | 5:102165082  | CD4+ T-Cells                       |
| BIVM    | 13:103430929 | -0.058  | 0.0056  | 6.77E-25  | PAM     | 5:102151674  | Erythrocytes                       |
| BLK     | 8:11339882   | 0.0517  | 0.00456 | 2.22E-29  | PAM     | 5:102153434  | Interferon response/Anti-bacterial |
| BLM     | 15:91351930  | 0.0724  | 0.00413 | 7.75E-67  | PAM     | 5:102153433  | Monocytes / Macrophages            |
| BLMH    | 17:28637173  | 0.0738  | 0.00436 | 1.03E-62  | PAM     | 5:102164118  | Neutrophils 1                      |
| BLOC1S2 | 10:102011702 | -0.198  | 0.0101  | 4.90E-83  | PAM     | 5:102151674  | Unknown                            |
| BLVRA   | 7:43845185   | 0.152   | 0.00648 | 1.58E-115 | PAPSS1  | 4:108609628  | Erythrocytes                       |
| BLVRB   | 19:40941154  | 0.207   | 0.0182  | 1.47E-29  | PAPSS1  | 4:108615679  | Interferon response/Anti-bacterial |
| BMF     | 15:40447265  | 0.0291  | 0.00311 | 1.08E-20  | PAPSS1  | 4:108610005  | Neutrophils 10                     |
| BMP6    | 6:7862631    | 0.0452  | 0.00515 | 2.55E-18  | PAQR6   | 1:156219450  | Interferon response/Anti-bacterial |
| BMPR1A  | 10:88635779  | 0.0516  | 0.0073  | 1.72E-12  | PCTP    | 17:53840694  | NK cells / CD8+ T-Cells            |
| BMPR2   | 2:203270092  | -0.0616 | 0.00499 | 1.69E-34  | PEX6    | 6:42940673   | Interferon response/Anti-bacterial |
| BMS1P1  | 10:47619049  | -0.9    | 0.0984  | 8.66E-20  | PF4V1   | 4:74718845   | Interferon response/Anti-bacterial |
| BNC2    | 9:16876283   | -0.0584 | 0.0048  | 1.44E-33  | PFKP    | 10:3190499   | Erythrocytes                       |
| BNIP1   | 5:172591337  | 0.0422  | 0.00604 | 3.22E-12  | PGGT1B  | 5:114548071  | Interferon response/Anti-bacterial |
| BNIP2   | 15:59966305  | 0.0979  | 0.00428 | 1.36E-110 | PGM5    | 9:71175565   | Interferon response/Anti-bacterial |
| BNIPL   | 1:151033979  | -0.0248 | 0.00353 | 2.12E-12  | PI4K2B  | 4:25290490   | B-cells                            |
| BOD1    | 5:173046555  | -0.0491 | 0.00776 | 2.86E-10  | PIAS2   | 18:44380602  | Unknown                            |
| BOD1L1  | 4:13580532   | -0.0677 | 0.0101  | 2.29E-11  | PIEZO2  | 18:10829069  | Erythrocytes                       |
| BOLL    | 2:198568076  | -0.0385 | 0.0036  | 2.41E-26  | PISD    | 22:31998612  | Interferon response/Anti-bacterial |
| BORA    | 13:73296812  | 0.257   | 0.0119  | 2.65E-99  | PLB1    | 2:28677086   | Interferon response/Anti-bacterial |
| BPI     | 20:36925819  | -0.428  | 0.0345  | 6.53E-35  | PLD6    | 17:17158343  | NK cells / CD8+ T-Cells            |
| BRCA2   | 13:32887616  | 0.0249  | 0.00328 | 3.40E-14  | PLEKHA1 | 10:124156944 | Monocytes / Macrophages            |
| BRD1    | 22:50250464  | -0.0291 | 0.00493 | 3.73E-09  | PLIN2   | 9:19127489   | Interferon response/Anti-bacterial |
| BRD2    | 6:32919524   | -0.017  | 0.0029  | 5.09E-09  | PLK1S1  | 20:21179145  | Interferon response/Anti-bacterial |
| BRD3    | 9:136925451  | -0.0213 | 0.00238 | 4.88E-19  | PLOD1   | 1:12048595   | Interferon response/Anti-bacterial |

|           |              |         |         |           |          |             |                                    |
|-----------|--------------|---------|---------|-----------|----------|-------------|------------------------------------|
| BRI3BP    | 12:125471505 | -0.0388 | 0.00351 | 4.80E-28  | PLXNC1   | 12:94606526 | Erythrocytes                       |
| BRIP1     | 17:59967940  | -0.0466 | 0.00619 | 5.45E-14  | PLXNC1   | 12:94632933 | Monocytes / Macrophages            |
| BRK1      | 3:10165778   | 0.119   | 0.00686 | 7.92E-66  | POLI     | 18:51781019 | Interferon response/Anti-bacterial |
| BRWD1     | 21:40661881  | -0.0845 | 0.00656 | 1.98E-37  | PPFIBP2  | 11:7561609  | Unknown                            |
| BSC12     | 11:62451457  | -0.219  | 0.0141  | 2.83E-53  | PPIE     | 1:40213670  | Interferon response/Anti-bacterial |
| BST1      | 4:15737348   | 0.0779  | 0.00509 | 7.91E-52  | PPIP5K2  | 5:102450576 | Interferon response/Anti-bacterial |
| BTA1F1    | 10:93702042  | -0.0221 | 0.00321 | 6.28E-12  | PPIP5K2  | 5:102436268 | Monocytes / Macrophages            |
| BTBD10    | 11:13467982  | 0.0826  | 0.00553 | 2.26E-49  | PPP1R16B | 20:37506112 | Erythrocytes                       |
| BTBD11    | 12:107718282 | -0.108  | 0.00604 | 8.38E-70  | PPP2R3C  | 14:35559545 | Interferon response/Anti-bacterial |
| BTBD6     | 14:105722726 | 0.0908  | 0.0068  | 4.40E-40  | PPP2R5A  | 1:212516456 | Interferon response/Anti-bacterial |
| BTBD7     | 14:93751018  | -0.0204 | 0.00309 | 4.10E-11  | PPT1     | 1:40561471  | Interferon response/Anti-bacterial |
| BTF3      | 5:72797720   | -0.0626 | 0.0104  | 2.14E-09  | PRDM5    | 4:121693006 | Interferon response/Anti-bacterial |
| BTG2      | 1:203255493  | 0.0619  | 0.00395 | 4.65E-54  | PRDX5    | 11:64076244 | Interferon response/Anti-bacterial |
| BTN2A1    | 6:26465768   | -0.178  | 0.00477 | 1.88E-270 | PRDX6    | 1:173485336 | Interferon response/Anti-bacterial |
| BTN2A2    | 6:26404374   | -0.0697 | 0.00475 | 7.13E-48  | PRKCA    | 17:64536982 | Monocytes / Macrophages            |
| BTN3A1    | 6:26404694   | -0.0759 | 0.00491 | 1.04E-52  | PRKCE    | 2:45925708  | CD4+ T-Cells                       |
| BTN3A2    | 6:26316295   | 0.635   | 0.0133  | <1.0E-314 | PRKCE    | 2:45862997  | Erythrocytes                       |
| BTN3A3    | 6:26391391   | -0.0667 | 0.00999 | 2.74E-11  | PRKCE    | 2:45862997  | Monocytes / Macrophages            |
| BTNL3     | 5:180365855  | -0.477  | 0.00685 | <1.0E-314 | PRKCE    | 2:45925708  | Neutrophils 1                      |
| BTNL9     | 5:180470133  | -0.0221 | 0.00346 | 1.80E-10  | PRKCQ    | 10:6542361  | Monocytes / Macrophages            |
| BUB3      | 10:124910214 | -0.0634 | 0.00515 | 2.16E-34  | PRKD3    | 2:37565276  | Interferon response/Anti-bacterial |
| BUD13     | 11:116640768 | 0.0245  | 0.00314 | 6.32E-15  | PRMT5    | 14:23430714 | Interferon response/Anti-bacterial |
| BUD31     | 7:99015791   | 0.0632  | 0.00813 | 9.69E-15  | PRUNE2   | 9:79318471  | Erythrocytes                       |
| C10orf111 | 10:15134114  | 0.0593  | 0.00858 | 5.28E-12  | PRUNE2   | 9:79326505  | Interferon response/Anti-bacterial |
| C10orf137 | 10:127441439 | 0.0281  | 0.00468 | 2.17E-09  | PSAP     | 10:73578151 | Monocytes / Macrophages            |
| C10orf32  | 10:104623053 | 0.0717  | 0.00669 | 1.49E-26  | PSMA8    | 18:23766127 | Erythrocytes                       |
| C10orf35  | 10:71384325  | 0.0282  | 0.00438 | 1.37E-10  | PSMA8    | 18:23782005 | Monocytes / Macrophages            |
| C10orf54  | 10:73526468  | -0.0305 | 0.00499 | 1.03E-09  | PSMD13   | 11:240868   | Interferon response/Anti-bacterial |
| C10orf68  | 10:33087660  | -0.118  | 0.00519 | 8.31E-109 | PTPLA    | 10:17598276 | Monocytes / Macrophages            |
| C10orf76  | 10:103657957 | 0.0329  | 0.00439 | 8.65E-14  | PTPRG    | 3:62245373  | Erythrocytes                       |
| C10orf88  | 10:124704695 | -0.0359 | 0.00502 | 9.60E-13  | PTPRG    | 3:62245373  | Monocytes / Macrophages            |
| C11orf21  | 11:2316720   | -0.121  | 0.0102  | 7.61E-32  | PTPRG    | 3:62245373  | Neutrophils 1                      |
| C11orf30  | 11:76125330  | 0.0206  | 0.003   | 7.10E-12  | PVRL2    | 19:45376317 | Interferon response/Anti-bacterial |
| C11orf31  | 11:57493622  | -0.0409 | 0.00437 | 1.04E-20  | PVRL2    | 19:45372329 | NK cells / CD8+ T-Cells            |
| C11orf42  | 11:6228594   | -0.0462 | 0.00618 | 8.37E-14  | QKI      | 6:163871318 | Interferon response/Anti-bacterial |
| C11orf48  | 11:62426194  | -0.16   | 0.0119  | 1.86E-40  | RABGAP1L | 1:174995816 | Erythrocytes                       |
| C11orf54  | 11:93500659  | -0.0621 | 0.00411 | 1.62E-50  | RABGAP1L | 1:174995816 | Monocytes / Macrophages            |
| C11orf58  | 11:16748468  | -0.0592 | 0.00687 | 8.44E-18  | RAC1     | 7:6414762   | Interferon response/Anti-bacterial |
| C11orf63  | 11:122748288 | -0.0954 | 0.00514 | 1.61E-74  | RAD51C   | 17:56816892 | Interferon response/Anti-bacterial |

|           |              |         |         |           |         |              |                                    |
|-----------|--------------|---------|---------|-----------|---------|--------------|------------------------------------|
| C11orf71  | 11:114269266 | 0.0334  | 0.00401 | 1.03E-16  | RAP1GAP | 1:22023238   | NK cells / CD8+ T-Cells            |
| C11orf75  | 11:93231389  | -0.169  | 0.00703 | 1.94E-121 | RAPGEF2 | 4:160237160  | B-cells                            |
| C11orf92  | 11:111197776 | -0.0382 | 0.00477 | 1.28E-15  | RASGRF1 | 15:79304104  | Erythrocytes                       |
| C12orf23  | 12:107321748 | -0.053  | 0.00518 | 2.39E-24  | RASGRF1 | 15:79304104  | Monocytes / Macrophages            |
| C12orf29  | 12:88444592  | -0.0393 | 0.00641 | 9.69E-10  | RASGRF1 | 15:79268295  | Neutrophils 1                      |
| C12orf39  | 12:21714448  | -0.07   | 0.00632 | 2.91E-28  | RASGRF2 | 5:80232479   | Monocytes / Macrophages            |
| C12orf4   | 12:4676899   | 0.0545  | 0.00863 | 2.96E-10  | RBL2    | 16:53490676  | Interferon response/Anti-bacterial |
| C12orf43  | 12:121438382 | 0.0252  | 0.00344 | 2.47E-13  | RBMS3   | 3:29612955   | Erythrocytes                       |
| C12orf44  | 12:52460424  | 0.0258  | 0.00417 | 6.52E-10  | RBMS3   | 3:29612955   | Monocytes / Macrophages            |
| C12orf5   | 12:4446116   | 0.0827  | 0.00662 | 2.41E-35  | RBPMS2  | 15:65098593  | Interferon response/Anti-bacterial |
| C12orf60  | 12:14955702  | -0.0442 | 0.00669 | 4.45E-11  | RCBTB1  | 13:50159305  | Interferon response/Anti-bacterial |
| C12orf65  | 12:123747783 | -0.027  | 0.00413 | 6.26E-11  | RIN2    | 20:19962931  | Neutrophils 1                      |
| C12orf75  | 12:105754678 | 0.329   | 0.0248  | 1.62E-39  | RNASE3  | 14:21349608  | Neutrophils 10                     |
| C14orf101 | 14:57107856  | -0.0599 | 0.00753 | 2.21E-15  | RNASET2 | 6:167376466  | Interferon response/Anti-bacterial |
| C14orf132 | 14:96468108  | 0.0485  | 0.00609 | 1.95E-15  | RNASET2 | 6:167369992  | Neutrophils 10                     |
| C14orf159 | 14:91581340  | 0.298   | 0.00907 | 3.02E-216 | RNF182  | 6:13918461   | Interferon response/Anti-bacterial |
| C14orf166 | 14:52471263  | 0.11    | 0.00931 | 5.09E-32  | RNPEP   | 1:201954728  | Interferon response/Anti-bacterial |
| C14orf2   | 14:104381687 | 0.119   | 0.00896 | 2.42E-39  | ROR1    | 1:64498282   | Erythrocytes                       |
| C15orf26  | 15:81397782  | -0.0381 | 0.0047  | 6.03E-16  | ROR1    | 1:64453767   | Monocytes / Macrophages            |
| C15orf37  | 15:80212491  | -0.122  | 0.00503 | 3.56E-123 | ROR1    | 1:64556996   | Neutrophils 1                      |
| C15orf38  | 15:90455379  | 0.162   | 0.00631 | 2.43E-137 | RORA    | 15:61451437  | Monocytes / Macrophages            |
| C15orf40  | 15:83646331  | 0.0273  | 0.00413 | 3.88E-11  | RPH3A   | 12:113324731 | Interferon response/Anti-bacterial |
| C15orf41  | 15:36870972  | 0.0328  | 0.00553 | 3.12E-09  | RPL31   | 2:101629413  | Interferon response/Anti-bacterial |
| C15orf54  | 15:39546830  | 0.298   | 0.0256  | 7.13E-31  | RPS15A  | 16:18838751  | Interferon response/Anti-bacterial |
| C15orf57  | 15:40848351  | 0.133   | 0.00451 | 2.33E-177 | RPS18   | 6:33196122   | B-cells                            |
| C16orf13  | 16:675067    | -0.0815 | 0.0126  | 9.60E-11  | RPS18   | 6:33196122   | Unknown                            |
| C16orf54  | 16:29748924  | -0.0593 | 0.00465 | 1.08E-36  | RPS25   | 11:118892787 | Neutrophils 1                      |
| C16orf55  | 16:89716222  | 0.0653  | 0.00754 | 6.71E-18  | RRP12   | 10:99143878  | Interferon response/Anti-bacterial |
| C16orf62  | 16:19634841  | 0.0243  | 0.0037  | 5.59E-11  | RSU1    | 10:16872797  | Interferon response/Anti-bacterial |
| C16orf80  | 16:58205340  | 0.104   | 0.0126  | 1.63E-16  | RYR3    | 15:33967794  | Unknown                            |
| C17orf49  | 17:6902179   | 0.185   | 0.0106  | 3.00E-66  | S100A12 | 1:153376880  | CD4+ T-Cells                       |
| C17orf62  | 17:80402045  | 0.045   | 0.00408 | 4.61E-28  | S100A12 | 1:153362146  | Interferon response/Anti-bacterial |
| C17orf75  | 17:30659006  | 0.0466  | 0.00546 | 1.81E-17  | S100P   | 4:6697554    | Interferon response/Anti-bacterial |
| C17orf77  | 17:72563686  | -0.0406 | 0.00637 | 2.14E-10  | S100PBP | 1:33304596   | Unknown                            |
| C17orf80  | 17:71217074  | -0.0294 | 0.00383 | 1.95E-14  | SAMD12  | 8:119666300  | Interferon response/Anti-bacterial |
| C17orf97  | 17:259304    | -0.158  | 0.00754 | 5.00E-94  | SAMD3   | 6:130455734  | Erythrocytes                       |
| C18orf25  | 18:43802778  | 0.0327  | 0.00514 | 2.05E-10  | SAMD3   | 6:130419776  | Neutrophils 2                      |
| C18orf32  | 18:47047929  | -0.119  | 0.0193  | 7.22E-10  | SCHIP1  | 3:159388148  | Erythrocytes                       |
| C19orf10  | 19:4658254   | 0.0736  | 0.00991 | 1.24E-13  | SCHIP1  | 3:159628463  | Monocytes / Macrophages            |



|           |             |         |         |           |          |              |                                    |
|-----------|-------------|---------|---------|-----------|----------|--------------|------------------------------------|
| C19orf12  | 19:30204855 | -0.0748 | 0.00811 | 4.16E-20  | SCHIP1   | 3:159663351  | Neutrophils 1                      |
| C19orf33  | 19:38821697 | 0.0715  | 0.00401 | 4.82E-69  | SCP2     | 1:53402552   | Interferon response/Anti-bacterial |
| C19orf40  | 19:33468410 | 0.0744  | 0.00596 | 3.14E-35  | SCP2     | 1:53392908   | Unknown                            |
| C19orf47  | 19:40855872 | -0.0189 | 0.00324 | 5.07E-09  | SENP6    | 6:76304062   | Interferon response/Anti-bacterial |
| C19orf54  | 19:41255500 | -0.0317 | 0.00293 | 4.75E-27  | SEPT10   | 2:110412315  | Monocytes / Macrophages            |
| C19orf60  | 19:18702497 | -0.0542 | 0.00391 | 5.87E-43  | SEPT2    | 2:242294913  | Interferon response/Anti-bacterial |
| C19orf66  | 19:10237185 | -0.0536 | 0.00777 | 6.09E-12  | SEPT4    | 17:56549663  | B-cells                            |
| C1GALT1   | 7:7244181   | 0.163   | 0.00619 | 8.43E-144 | SEPT4    | 17:56549663  | Neutrophils 1                      |
| C1orf101  | 1:244628341 | -0.0178 | 0.003   | 2.98E-09  | SEPT4    | 17:56549663  | Unknown                            |
| C1orf131  | 1:231376806 | 0.0499  | 0.00648 | 1.50E-14  | SERPINA1 | 14:94843455  | Erythrocytes                       |
| C1orf174  | 1:3788499   | -0.21   | 0.00854 | 2.27E-126 | SETD9    | 5:56226824   | Interferon response/Anti-bacterial |
| C1orf177  | 1:55274052  | -0.0275 | 0.00401 | 8.29E-12  | SFXN4    | 10:120923339 | Interferon response/Anti-bacterial |
| C1orf198  | 1:231012288 | -0.0581 | 0.00545 | 2.64E-26  | SGPP2    | 2:223429784  | Erythrocytes                       |
| C1orf220  | 1:178532010 | -0.0815 | 0.00614 | 1.75E-39  | SHKBP1   | 19:41091821  | Interferon response/Anti-bacterial |
| C1orf27   | 1:186330315 | -0.047  | 0.00367 | 5.44E-37  | SIDT2    | 11:117068504 | Interferon response/Anti-bacterial |
| C1orf54   | 1:150245082 | 0.231   | 0.0282  | 3.07E-16  | SIRPB1   | 20:1599142   | Interferon response/Anti-bacterial |
| C1orf85   | 1:156215899 | 0.156   | 0.00354 | <1.0E-314 | SIRT5    | 6:13574491   | Interferon response/Anti-bacterial |
| C1orf87   | 1:60570185  | -0.114  | 0.0135  | 4.96E-17  | SLC12A1  | 15:48596713  | Erythrocytes                       |
| C1QA      | 1:22968425  | 0.0488  | 0.00751 | 8.87E-11  | SLC12A1  | 15:48596713  | Interferon response/Anti-bacterial |
| C1QBP     | 17:5293080  | -0.0299 | 0.00305 | 2.16E-22  | SLC12A1  | 15:48606346  | Monocytes / Macrophages            |
| C1QTNF6   | 22:37573712 | -0.0235 | 0.0031  | 3.69E-14  | SLC12A1  | 15:48597514  | Neutrophils 1                      |
| C1QTNF7   | 4:15494124  | -0.118  | 0.00756 | 4.92E-54  | SLC12A1  | 15:48596713  | Neutrophils 10                     |
| C1RL-AS1  | 12:7263699  | -0.0489 | 0.00605 | 8.18E-16  | SLC12A1  | 15:48596713  | NK cells / CD8+ T-Cells            |
| C2        | 6:31851234  | -0.0221 | 0.00363 | 1.08E-09  | SLC12A1  | 15:48596713  | Unknown                            |
| C20orf111 | 20:42832789 | -0.143  | 0.00553 | 1.13E-139 | SLC1A3   | 5:36641858   | CD4+ T-Cells                       |
| C20orf112 | 20:31042169 | -0.0265 | 0.00415 | 1.93E-10  | SLC1A3   | 5:36641858   | Unknown                            |
| C20orf196 | 20:5755860  | 0.0384  | 0.00515 | 1.09E-13  | SLC23A2  | 20:4950311   | Erythrocytes                       |
| C20orf197 | 20:58644272 | 0.0494  | 0.00359 | 2.51E-42  | SLC23A2  | 20:4896214   | Monocytes / Macrophages            |
| C20orf24  | 20:35208051 | 0.0498  | 0.00843 | 3.53E-09  | SLC25A24 | 1:108742123  | Monocytes / Macrophages            |
| C20orf72  | 20:17954706 | 0.136   | 0.00602 | 4.69E-108 | SLC44A4  | 6:31864304   | Interferon response/Anti-bacterial |
| C20orf96  | 20:262570   | 0.0658  | 0.00391 | 5.30E-62  | SLC44A4  | 6:31847196   | NK cells / CD8+ T-Cells            |
| C21orf128 | 21:43529185 | -0.03   | 0.0046  | 7.20E-11  | SLC44A5  | 1:75933611   | Interferon response/Anti-bacterial |
| C21orf2   | 21:45759355 | -0.052  | 0.00756 | 6.76E-12  | SLC4A7   | 3:27445270   | Monocytes / Macrophages            |
| C21orf33  | 21:45515366 | -0.0254 | 0.00344 | 1.57E-13  | SLFN5    | 17:33520263  | Neutrophils 1                      |
| C21orf62  | 21:34146179 | 0.14    | 0.00976 | 4.54E-46  | SLFN5    | 17:33565304  | Neutrophils 2                      |
| C21orf67  | 21:46352040 | -0.039  | 0.00389 | 1.74E-23  | SMG5     | 1:156275281  | Interferon response/Anti-bacterial |
| C21orf7   | 21:30530692 | -0.0401 | 0.0057  | 2.19E-12  | SMG5     | 1:156220056  | Unknown                            |
| C21orf91  | 21:19169155 | -0.0679 | 0.00467 | 4.91E-47  | SMG7     | 1:183572649  | B-cells                            |
| C22orf32  | 22:42429049 | 0.394   | 0.00553 | <1.0E-314 | SNRPN    | 15:25235326  | Interferon response/Anti-bacterial |

|          |             |         |         |           |         |              |                                    |
|----------|-------------|---------|---------|-----------|---------|--------------|------------------------------------|
| C22orf34 | 22:50018651 | -0.156  | 0.00428 | 5.57E-259 | SNX16   | 8:82748437   | Interferon response/Anti-bacterial |
| C22orf43 | 22:23988257 | 0.145   | 0.00414 | 1.95E-240 | SNX25   | 4:186199652  | Erythrocytes                       |
| C2CD2    | 21:43326524 | -0.0216 | 0.00342 | 2.84E-10  | SNX25   | 4:186124959  | Monocytes / Macrophages            |
| C2CD3    | 11:73802736 | 0.0531  | 0.00393 | 7.51E-41  | SNX6    | 14:35061728  | Interferon response/Anti-bacterial |
| C2CD5    | 12:22697423 | -0.183  | 0.00687 | 6.14E-147 | SP140   | 2:231207684  | Neutrophils 1                      |
| C2orf15  | 2:99764260  | -0.0679 | 0.00596 | 9.39E-30  | SPARCL1 | 4:88476673   | B-cells                            |
| C2orf29  | 2:101917365 | 0.0224  | 0.0028  | 1.38E-15  | SPARCL1 | 4:88476673   | Neutrophils 2                      |
| C2orf42  | 2:70414485  | 0.0644  | 0.00833 | 1.31E-14  | SPARCL1 | 4:88476673   | Unknown                            |
| C2orf43  | 2:20888265  | 0.0481  | 0.00513 | 9.50E-21  | SPATA20 | 17:48624523  | Interferon response/Anti-bacterial |
| C2orf44  | 2:24319352  | -0.0441 | 0.00626 | 2.13E-12  | SPATA7  | 14:88907471  | Interferon response/Anti-bacterial |
| C2orf49  | 2:105937633 | -0.0419 | 0.00643 | 7.52E-11  | SPATS2L | 2:201135905  | B-cells                            |
| C2orf61  | 2:47381097  | -0.0828 | 0.01    | 1.62E-16  | SPATS2L | 2:201135905  | Neutrophils 1                      |
| C2orf88  | 2:191091275 | -0.0835 | 0.0104  | 9.04E-16  | SPTLC2  | 14:78031773  | Neutrophils 1                      |
| C3AR1    | 12:8206167  | 0.414   | 0.00741 | <1.0E-314 | STK32B  | 4:5399876    | Erythrocytes                       |
| C3orf14  | 3:62305073  | 0.0841  | 0.00776 | 3.85E-27  | STK32B  | 4:5399876    | Monocytes / Macrophages            |
| C3orf17  | 3:112753327 | -0.15   | 0.0102  | 2.44E-48  | STRBP   | 9:125916612  | Monocytes / Macrophages            |
| C3orf20  | 3:14712473  | 0.0319  | 0.00217 | 5.98E-48  | STX3    | 11:59563481  | Interferon response/Anti-bacterial |
| C3orf35  | 3:37441773  | 0.0207  | 0.00341 | 1.37E-09  | SUPT20H | 13:37609725  | Interferon response/Anti-bacterial |
| C3orf49  | 3:63815326  | -0.0963 | 0.0153  | 3.44E-10  | SYCP2L  | 6:10886949   | Interferon response/Anti-bacterial |
| C3orf58  | 3:143705727 | -0.0472 | 0.00444 | 4.42E-26  | SYCP2L  | 6:10887276   | Monocytes / Macrophages            |
| C3orf62  | 3:49305140  | 0.0401  | 0.00626 | 1.56E-10  | SYCP2L  | 6:10887253   | Neutrophils 10                     |
| C4B      | 6:31973863  | 0.0411  | 0.00216 | 2.30E-78  | SYCP2L  | 6:10887276   | NK cells / CD8+ T-Cells            |
| C4BPA    | 1:207269205 | -1.39   | 0.0321  | <1.0E-314 | SYCP2L  | 6:10893120   | Unknown                            |
| C4BPB    | 1:207261196 | -0.0459 | 0.00359 | 6.92E-37  | SYT17   | 16:19290797  | Erythrocytes                       |
| C4orf19  | 4:37640962  | -0.0358 | 0.00466 | 1.94E-14  | SYT17   | 16:19290797  | Monocytes / Macrophages            |
| C4orf21  | 4:113463265 | -0.0768 | 0.00354 | 4.91E-100 | TACSTD2 | 1:59048003   | Interferon response/Anti-bacterial |
| C4orf27  | 4:170664777 | -0.0792 | 0.01    | 2.80E-15  | TANK    | 2:162007430  | Interferon response/Anti-bacterial |
| C4orf3   | 4:120219238 | -0.0847 | 0.00664 | 9.26E-37  | TBC1D4  | 13:75842705  | Monocytes / Macrophages            |
| C4orf32  | 4:113119806 | -0.0316 | 0.00305 | 5.48E-25  | TBC1D7  | 6:13319402   | Interferon response/Anti-bacterial |
| C4orf33  | 4:130037838 | 0.0651  | 0.00476 | 7.55E-42  | TC2N    | 14:92290983  | Erythrocytes                       |
| C4orf45  | 4:159972514 | -0.0947 | 0.0076  | 3.60E-35  | TC2N    | 14:92290983  | Monocytes / Macrophages            |
| C5       | 9:123769200 | -0.0861 | 0.00352 | 3.56E-125 | TCF4    | 18:53011777  | Erythrocytes                       |
| C5AR1    | 19:47787587 | -0.122  | 0.0172  | 1.31E-12  | TCF4    | 18:53011777  | Monocytes / Macrophages            |
| C5orf22  | 5:31524477  | 0.0696  | 0.00571 | 1.08E-33  | TCF4    | 18:53289421  | Neutrophils 1                      |
| C5orf34  | 5:43542511  | 0.0231  | 0.00321 | 7.40E-13  | TDRD9   | 14:104534574 | Erythrocytes                       |
| C5orf4   | 5:154200612 | -0.192  | 0.00866 | 1.39E-103 | TFG     | 3:100428460  | Interferon response/Anti-bacterial |
| C5orf44  | 5:64893443  | 0.0384  | 0.00432 | 7.79E-19  | THEMIS2 | 1:28207887   | Interferon response/Anti-bacterial |
| C5orf45  | 5:179276913 | -0.0249 | 0.00379 | 5.53E-11  | TIAM1   | 21:32856175  | Monocytes / Macrophages            |
| C5orf58  | 5:169666462 | 0.0394  | 0.00488 | 8.92E-16  | TIMM10  | 11:57311754  | B-cells                            |

|          |             |         |         |           |          |              |                                    |
|----------|-------------|---------|---------|-----------|----------|--------------|------------------------------------|
| C6orf1   | 6:34234953  | -0.0476 | 0.00665 | 9.41E-13  | TIMM10   | 11:57339950  | Interferon response/Anti-bacterial |
| C6orf10  | 6:32331002  | 0.125   | 0.00772 | 8.60E-58  | TIMM10   | 11:57347525  | Neutrophils 1                      |
| C6orf106 | 6:34603691  | -0.0456 | 0.0052  | 2.52E-18  | TM6SF1   | 15:83819409  | Erythrocytes                       |
| C6orf170 | 6:121655392 | 0.0712  | 0.00643 | 3.06E-28  | TMEM19   | 12:72140391  | Erythrocytes                       |
| C6orf201 | 6:4121333   | 0.0305  | 0.0037  | 1.81E-16  | TMEM258  | 11:61560081  | Interferon response/Anti-bacterial |
| C6orf211 | 6:151829847 | -0.109  | 0.0103  | 3.29E-26  | TNIK     | 3:171065575  | Monocytes / Macrophages            |
| C6orf25  | 6:31672242  | 0.1     | 0.0136  | 2.19E-13  | TNIK     | 3:170981811  | Neutrophils 1                      |
| C6orf48  | 6:31841010  | -0.292  | 0.0254  | 2.17E-30  | TOR1B    | 9:132551788  | Interferon response/Anti-bacterial |
| C6orf57  | 6:71289189  | 0.0404  | 0.00549 | 2.07E-13  | TPM2     | 9:35680337   | Interferon response/Anti-bacterial |
| C6orf62  | 6:24713723  | -0.0467 | 0.0054  | 7.47E-18  | TPR      | 1:186369973  | B-cells                            |
| C7orf10  | 7:40328119  | -0.0313 | 0.00517 | 1.47E-09  | TRAK1    | 3:42199095   | Erythrocytes                       |
| C7orf13  | 7:156445785 | 0.0725  | 0.00622 | 5.44E-31  | TRAM2    | 6:52333130   | Erythrocytes                       |
| C7orf25  | 7:42942126  | -0.194  | 0.0102  | 7.78E-78  | TRAT1    | 3:108512303  | Monocytes / Macrophages            |
| C7orf26  | 7:6672079   | 0.103   | 0.0146  | 1.43E-12  | TREML4   | 6:41195147   | Interferon response/Anti-bacterial |
| C7orf31  | 7:25220533  | -0.022  | 0.00363 | 1.31E-09  | TRIB2    | 2:12863770   | Monocytes / Macrophages            |
| C7orf34  | 7:142624333 | 0.361   | 0.0224  | 5.10E-57  | TRIM37   | 17:57129882  | Interferon response/Anti-bacterial |
| C7orf41  | 7:30230870  | 0.0771  | 0.00938 | 2.56E-16  | TRPC6    | 11:101398450 | Neutrophils 10                     |
| C7orf43  | 7:99744174  | 0.0362  | 0.00494 | 2.65E-13  | TSGA10   | 2:99724512   | Interferon response/Anti-bacterial |
| C7orf49  | 7:134831048 | -0.106  | 0.00485 | 1.24E-100 | TSHZ2    | 20:51636715  | Monocytes / Macrophages            |
| C7orf50  | 7:1029585   | -0.0194 | 0.00252 | 1.79E-14  | TSPAN5   | 4:99568001   | NK cells / CD8+ T-Cells            |
| C7orf53  | 7:112095622 | -0.0761 | 0.00742 | 1.99E-24  | TTC39C   | 18:21621280  | Monocytes / Macrophages            |
| C7orf55  | 7:139018957 | 0.0237  | 0.00397 | 2.61E-09  | TUBB2A   | 6:3158460    | Interferon response/Anti-bacterial |
| C7orf60  | 7:112579251 | 0.0813  | 0.0107  | 3.01E-14  | TUBB2A   | 6:3147432    | NK cells / CD8+ T-Cells            |
| C7orf61  | 7:100099466 | -0.0381 | 0.00617 | 6.68E-10  | TXK      | 4:48061275   | Erythrocytes                       |
| C8orf31  | 8:144161293 | -0.0942 | 0.00611 | 2.11E-52  | TXK      | 4:48061275   | Monocytes / Macrophages            |
| C8orf40  | 8:42418445  | -0.156  | 0.00563 | 1.85E-158 | TXK      | 4:48061275   | Neutrophils 1                      |
| C8orf44  | 8:67583681  | -0.0601 | 0.0102  | 4.65E-09  | TXNL4A   | 18:77749211  | Interferon response/Anti-bacterial |
| C8orf46  | 8:67378739  | -0.032  | 0.00339 | 6.72E-21  | UBASH3B  | 11:122644031 | Monocytes / Macrophages            |
| C8orf59  | 8:86130628  | -0.145  | 0.00566 | 2.01E-136 | UBASH3B  | 11:122644031 | Neutrophils 1                      |
| C9orf123 | 9:7793622   | -0.0704 | 0.0104  | 1.74E-11  | UBE2D1   | 10:60144207  | Interferon response/Anti-bacterial |
| C9orf131 | 9:34997569  | -0.034  | 0.00341 | 3.93E-23  | UGDH     | 4:39526467   | Interferon response/Anti-bacterial |
| C9orf156 | 9:100663700 | -0.08   | 0.0036  | 1.92E-104 | UHRF1BP1 | 6:34799221   | Interferon response/Anti-bacterial |
| C9orf3   | 9:97638926  | -0.0982 | 0.00467 | 2.12E-94  | USP28    | 11:113716123 | Erythrocytes                       |
| C9orf41  | 9:77566246  | 0.0326  | 0.00432 | 4.76E-14  | USP34    | 2:61404415   | Monocytes / Macrophages            |
| C9orf47  | 9:91566754  | -0.0274 | 0.0044  | 5.08E-10  | USP53    | 4:120131644  | Interferon response/Anti-bacterial |
| C9orf64  | 9:86549939  | 0.0659  | 0.00521 | 4.52E-36  | USP6     | 17:5016068   | B-cells                            |
| C9orf66  | 9:215511    | 0.0735  | 0.00731 | 1.42E-23  | UTS2     | 1:7962157    | Interferon response/Anti-bacterial |
| C9orf72  | 9:27572255  | 0.127   | 0.0052  | 4.81E-124 | UTS2     | 1:7961294    | Monocytes / Macrophages            |
| C9orf78  | 9:132549493 | 0.462   | 0.00969 | <1.0E-314 | UTS2     | 1:7960476    | NK cells / CD8+ T-Cells            |

|          |              |         |         |          |         |             |                                    |
|----------|--------------|---------|---------|----------|---------|-------------|------------------------------------|
| C9orf84  | 9:114435288  | -0.127  | 0.00651 | 2.09E-81 | VAMP8   | 2:85808573  | Interferon response/Anti-bacterial |
| C9orf85  | 9:74569379   | 0.0724  | 0.0105  | 5.23E-12 | VASH1   | 14:77182302 | Interferon response/Anti-bacterial |
| C9orf89  | 9:95864147   | 0.0526  | 0.00437 | 6.97E-33 | VIM     | 10:17270912 | B-cells                            |
| C9orf91  | 9:117405645  | 0.0395  | 0.00483 | 3.55E-16 | VNN1    | 6:133031252 | Interferon response/Anti-bacterial |
| CA13     | 8:86135096   | 0.0544  | 0.00456 | 2.14E-32 | VPS53   | 17:446554   | Interferon response/Anti-bacterial |
| CA2      | 8:86387530   | -0.118  | 0.00878 | 1.43E-40 | WDFY3   | 4:85881832  | Erythrocytes                       |
| CA6      | 1:9000220    | -0.126  | 0.0123  | 3.00E-24 | WLS     | 1:68736352  | Interferon response/Anti-bacterial |
| CA8      | 8:61193588   | -0.119  | 0.00553 | 4.11E-98 | WRB     | 21:40770885 | Interferon response/Anti-bacterial |
| CAB39    | 2:231596072  | 0.0435  | 0.00415 | 1.79E-25 | XKR3    | 22:17245877 | Erythrocytes                       |
| CAB39L   | 13:50019376  | -0.0384 | 0.00491 | 6.17E-15 | XKR3    | 22:17265194 | Interferon response/Anti-bacterial |
| CABIN1   | 22:24580485  | -0.0334 | 0.00374 | 4.71E-19 | XKR3    | 22:17245877 | Neutrophils 1                      |
| CABP5    | 19:48527902  | -0.352  | 0.0346  | 4.58E-24 | XRRA1   | 11:74574998 | B-cells                            |
| CACHD1   | 1:65016399   | 0.0438  | 0.00669 | 6.49E-11 | XRRA1   | 11:74659789 | Interferon response/Anti-bacterial |
| CACNA1D  | 3:53730735   | 0.0195  | 0.00248 | 3.80E-15 | YEATS4  | 12:69776886 | Interferon response/Anti-bacterial |
| CACNA1E  | 1:181467205  | 0.046   | 0.00473 | 3.45E-22 | ZADH2   | 18:72920065 | Interferon response/Anti-bacterial |
| CACNB2   | 10:18868840  | 0.0273  | 0.00342 | 1.69E-15 | ZC2HC1A | 8:79558153  | Interferon response/Anti-bacterial |
| CACNB3   | 12:49195780  | -0.0305 | 0.00435 | 2.61E-12 | ZNF138  | 7:64291976  | Interferon response/Anti-bacterial |
| CACNB4   | 2:152971003  | -0.104  | 0.0115  | 2.37E-19 | ZNF155  | 19:44488352 | Interferon response/Anti-bacterial |
| CACUL1   | 10:120485266 | -0.0276 | 0.003   | 5.44E-20 | ZNF286A | 17:15611343 | Interferon response/Anti-bacterial |
| CACYBP   | 1:175015808  | 0.0411  | 0.00509 | 7.71E-16 | ZNF354A | 5:178099833 | Interferon response/Anti-bacterial |
| CALB1    | 8:91064455   | 0.0972  | 0.00524 | 1.79E-74 | ZNF429  | 19:21770143 | Interferon response/Anti-bacterial |
| CALCOCO1 | 12:54112381  | 0.0186  | 0.00317 | 4.28E-09 | ZNF718  | 4:182845    | Interferon response/Anti-bacterial |
| CALCRL   | 2:188293636  | 0.084   | 0.00651 | 1.60E-37 | XRRA1   | 11:74659789 | Interferon response/Anti-bacterial |
| CALHM2   | 10:105231314 | 0.0971  | 0.00779 | 3.58E-35 | YEATS4  | 12:69776886 | Interferon response/Anti-bacterial |
| CALM3    | 19:47081668  | -0.0463 | 0.00502 | 4.15E-20 | ZADH2   | 18:72920065 | Interferon response/Anti-bacterial |
| CALML4   | 15:68537929  | -0.0507 | 0.00447 | 2.06E-29 | ZC2HC1A | 8:79558153  | Interferon response/Anti-bacterial |
| CALU     | 7:128424406  | 0.0487  | 0.00631 | 1.31E-14 | ZNF138  | 7:64291976  | Interferon response/Anti-bacterial |
| CAMK1D   | 10:12343629  | 0.116   | 0.00932 | 3.07E-35 | ZNF155  | 19:44488352 | Interferon response/Anti-bacterial |
| CAMK2D   | 4:114719328  | 0.0487  | 0.00434 | 7.36E-29 | ZNF286A | 17:15611343 | Interferon response/Anti-bacterial |
| CAMK2N1  | 1:20834610   | 0.0741  | 0.0102  | 3.45E-13 | ZNF354A | 5:178099833 | Interferon response/Anti-bacterial |
| CAMK4    | 5:110566360  | 0.179   | 0.0186  | 1.21E-21 | ZNF429  | 19:21770143 | Interferon response/Anti-bacterial |
| CAMKK2   | 12:121681536 | -0.0369 | 0.00355 | 4.56E-25 | ZNF718  | 4:182845    | Interferon response/Anti-bacterial |
| CAMKMT   | 2:44666570   | 0.0731  | 0.00732 | 2.96E-23 |         |             |                                    |
| CAMSAP1  | 9:138684454  | -0.035  | 0.00553 | 2.62E-10 |         |             |                                    |
| CAMSAP2  | 1:200708025  | 0.0561  | 0.0052  | 7.10E-27 |         |             |                                    |
| CAMTA1   | 1:7809383    | -0.0737 | 0.0062  | 4.04E-32 |         |             |                                    |
| CAMTA2   | 17:4897042   | -0.0698 | 0.00364 | 1.64E-79 |         |             |                                    |
| CANT1    | 17:76994843  | 0.0565  | 0.00352 | 1.06E-56 |         |             |                                    |
| CANX     | 5:179177544  | -0.0496 | 0.00698 | 1.39E-12 |         |             |                                    |

|          |              |         |         |           |
|----------|--------------|---------|---------|-----------|
| CAP1     | 1:40545964   | -0.0403 | 0.00426 | 4.59E-21  |
| CAPG     | 2:85628983   | 0.119   | 0.00602 | 2.43E-83  |
| CAPN1    | 11:64944965  | -0.0558 | 0.00295 | 4.08E-77  |
| CAPN3    | 15:42690901  | -0.193  | 0.022   | 2.11E-18  |
| CAPN7    | 3:15295364   | -0.0454 | 0.00383 | 5.36E-32  |
| CAPRIN2  | 12:30907594  | 0.0688  | 0.0075  | 6.56E-20  |
| CAPS2    | 12:75771980  | -0.0382 | 0.00425 | 2.95E-19  |
| CAPZA1   | 1:113191184  | -0.0607 | 0.00495 | 4.81E-34  |
| CAPZA2   | 7:116569136  | 0.0884  | 0.00606 | 2.72E-47  |
| CAPZB    | 1:19672376   | 0.034   | 0.00415 | 3.05E-16  |
| CARD11   | 7:3131792    | -0.0249 | 0.0035  | 1.21E-12  |
| CARD8    | 19:48762257  | -0.0637 | 0.00386 | 1.27E-59  |
| CARD9    | 9:139301960  | -0.0411 | 0.00517 | 2.18E-15  |
| CARHSP1  | 16:8929919   | 0.144   | 0.00933 | 5.71E-53  |
| CARKD    | 13:111268196 | 0.0883  | 0.00324 | 2.66E-153 |
| CARS2    | 13:111297448 | 0.0686  | 0.00344 | 2.95E-85  |
| CASC1    | 12:25258073  | -0.138  | 0.00786 | 2.53E-67  |
| CASC3    | 17:38282624  | 0.0563  | 0.00886 | 2.22E-10  |
| CASD1    | 7:94136931   | 0.0525  | 0.00707 | 1.28E-13  |
| CASP1    | 11:104949552 | -0.132  | 0.0115  | 5.61E-30  |
| CASP10   | 2:202036292  | -0.0263 | 0.00415 | 2.62E-10  |
| CASP2    | 7:142948773  | -0.124  | 0.0187  | 3.72E-11  |
| CASP3    | 4:185591804  | 0.108   | 0.00701 | 1.32E-52  |
| CASP5    | 11:104931537 | -0.296  | 0.0199  | 4.46E-49  |
| CASP6    | 4:110592090  | -0.0659 | 0.00569 | 1.02E-30  |
| CASP7    | 10:115439640 | -0.0716 | 0.00468 | 8.00E-52  |
| CASP8    | 2:202164837  | 0.0279  | 0.00315 | 1.06E-18  |
| CASP8AP2 | 6:90590112   | 0.0307  | 0.00375 | 3.15E-16  |
| CASP9    | 1:15817090   | -0.0255 | 0.00374 | 1.05E-11  |
| CASQ1    | 1:160136208  | -0.0852 | 0.0053  | 8.75E-57  |
| CASS4    | 20:55045843  | 0.0398  | 0.00465 | 1.50E-17  |
| CAST     | 5:95995733   | -0.116  | 0.00579 | 1.88E-86  |
| CAT      | 11:34442997  | -0.256  | 0.00637 | <1.0E-314 |
| CATSPER2 | 15:43920964  | 0.142   | 0.0117  | 3.08E-33  |
| CATSPERB | 14:92232971  | -0.36   | 0.0127  | 1.39E-164 |
| CATSPERG | 19:38834377  | -0.0944 | 0.00555 | 3.69E-63  |
| CBL      | 11:119152684 | 0.0842  | 0.00745 | 2.91E-29  |
| CBLB     | 3:105388590  | 0.0347  | 0.00582 | 2.59E-09  |
| CBLL1    | 7:107409810  | 0.0317  | 0.00458 | 4.79E-12  |

|          |              |         |         |           |
|----------|--------------|---------|---------|-----------|
| CBLN3    | 14:24898751  | 0.102   | 0.00391 | 9.96E-142 |
| CBR1     | 21:37435576  | 0.366   | 0.0196  | 1.87E-75  |
| CBR3     | 21:37489890  | 0.237   | 0.0076  | 1.27E-195 |
| CBR4     | 4:169909593  | -0.0651 | 0.00649 | 1.68E-23  |
| CBS      | 21:44473062  | -0.0497 | 0.00209 | 2.31E-118 |
| CBX1     | 17:46141276  | 0.0593  | 0.00504 | 1.40E-31  |
| CBX3     | 7:26191192   | 0.0943  | 0.0102  | 3.07E-20  |
| CBX5     | 12:54655470  | -0.0531 | 0.00564 | 6.49E-21  |
| CC2D1B   | 1:52843747   | -0.0458 | 0.0055  | 1.03E-16  |
| CC2D2B   | 10:97812812  | -0.227  | 0.0204  | 1.51E-28  |
| CCAR1    | 10:70483838  | -0.0381 | 0.0046  | 1.65E-16  |
| CCBL2    | 1:89440977   | 0.0649  | 0.00338 | 2.73E-79  |
| CCDC101  | 16:28575870  | 0.101   | 0.00553 | 2.67E-72  |
| CCDC107  | 9:35657063   | -0.02   | 0.00322 | 6.20E-10  |
| CCDC109B | 4:110590479  | 0.0379  | 0.00478 | 2.58E-15  |
| CCDC111  | 4:185571938  | -0.0577 | 0.00589 | 1.71E-22  |
| CCDC117  | 22:29225500  | -0.0454 | 0.00386 | 1.74E-31  |
| CCDC12   | 3:46979013   | -0.0363 | 0.00362 | 1.86E-23  |
| CCDC122  | 13:44434367  | -0.114  | 0.00466 | 4.36E-125 |
| CCDC124  | 19:18054643  | -0.0571 | 0.00713 | 1.46E-15  |
| CCDC125  | 5:68624793   | 0.203   | 0.00529 | 7.21E-284 |
| CCDC126  | 7:23634985   | -0.122  | 0.00654 | 1.66E-75  |
| CCDC127  | 5:256472     | 0.163   | 0.0116  | 1.99E-44  |
| CCDC13   | 3:42801920   | -0.0313 | 0.00277 | 2.38E-29  |
| CCDC130  | 19:13860145  | 0.0199  | 0.00312 | 1.87E-10  |
| CCDC132  | 7:92894727   | 0.067   | 0.00844 | 2.52E-15  |
| CCDC134  | 22:42198093  | 0.0281  | 0.00377 | 1.05E-13  |
| CCDC135  | 16:57722576  | -0.0259 | 0.00295 | 1.89E-18  |
| CCDC137  | 17:79636842  | 0.0415  | 0.00366 | 1.85E-29  |
| CCDC141  | 2:179909458  | -0.0626 | 0.00525 | 2.45E-32  |
| CCDC144B | 17:18573285  | -0.682  | 0.0543  | 1.27E-35  |
| CCDC146  | 7:76767073   | 0.667   | 0.0157  | <1.0E-314 |
| CCDC149  | 4:24901114   | -0.0487 | 0.00553 | 1.73E-18  |
| CCDC15   | 11:124847675 | -0.196  | 0.00642 | 1.59E-188 |
| CCDC169  | 13:36846472  | 0.0962  | 0.00572 | 5.90E-62  |
| CCDC170  | 6:151816537  | -0.124  | 0.0101  | 6.50E-34  |
| CCDC171  | 9:15553128   | -0.15   | 0.00635 | 6.79E-117 |
| CCDC176  | 14:74577697  | -0.112  | 0.0173  | 8.78E-11  |
| CCDC18   | 1:93791098   | -0.112  | 0.0149  | 6.76E-14  |

|          |              |         |         |           |
|----------|--------------|---------|---------|-----------|
| CCDC19   | 1:159892088  | 0.0426  | 0.00563 | 4.27E-14  |
| CCDC23   | 1:43230112   | -0.832  | 0.0162  | <1.0E-314 |
| CCDC25   | 8:27623295   | -0.0506 | 0.00505 | 2.19E-23  |
| CCDC28A  | 6:139097820  | -0.0741 | 0.00525 | 2.00E-44  |
| CCDC3    | 10:13084866  | -0.0449 | 0.00523 | 1.20E-17  |
| CCDC30   | 1:42951330   | 0.0591  | 0.00552 | 1.68E-26  |
| CCDC41   | 12:94853731  | 0.0716  | 0.00721 | 4.86E-23  |
| CCDC50   | 3:191045874  | -0.05   | 0.00595 | 5.60E-17  |
| CCDC53   | 12:102399354 | 0.106   | 0.00613 | 4.88E-65  |
| CCDC57   | 17:80091441  | -0.0344 | 0.0033  | 3.36E-25  |
| CCDC6    | 10:61549818  | -0.0283 | 0.00394 | 7.16E-13  |
| CCDC62   | 12:123275609 | 0.0742  | 0.00914 | 6.13E-16  |
| CCDC64   | 12:120482878 | -0.0448 | 0.00608 | 2.02E-13  |
| CCDC65   | 12:49353027  | 0.0253  | 0.0039  | 1.07E-10  |
| CCDC68   | 18:52637450  | 0.0367  | 0.005   | 2.26E-13  |
| CCDC69   | 5:150618993  | 0.0897  | 0.00549 | 1.19E-58  |
| CCDC75   | 2:37325108   | 0.0437  | 0.00602 | 4.43E-13  |
| CCDC77   | 12:518986    | 0.119   | 0.00676 | 8.65E-68  |
| CCDC80   | 3:112295907  | -0.0282 | 0.00456 | 6.50E-10  |
| CCDC81   | 11:86067375  | -0.0282 | 0.00385 | 2.62E-13  |
| CCDC82   | 11:96115744  | -0.243  | 0.00627 | 1.64E-289 |
| CCDC88A  | 2:55644201   | -0.0748 | 0.00827 | 2.12E-19  |
| CCDC9    | 19:47715831  | -0.0374 | 0.0038  | 1.20E-22  |
| CCDC90A  | 6:13845712   | 0.0575  | 0.00499 | 2.30E-30  |
| CCDC91   | 12:28611779  | 0.0544  | 0.00516 | 9.84E-26  |
| CCDC92   | 12:124440743 | 0.0473  | 0.00559 | 3.48E-17  |
| CCDC93   | 2:118670137  | 0.0575  | 0.00702 | 3.49E-16  |
| CCDC94   | 19:4236388   | 0.0951  | 0.00393 | 1.98E-122 |
| CCL20    | 2:228672579  | 0.0665  | 0.00637 | 3.22E-25  |
| CCL4     | 17:34431403  | -0.142  | 0.0132  | 1.35E-26  |
| CCL5     | 17:34221702  | 0.105   | 0.0101  | 6.74E-25  |
| CCM2     | 7:45067267   | -0.0419 | 0.00302 | 4.56E-43  |
| CCNA1    | 13:37025916  | -0.0392 | 0.00495 | 2.95E-15  |
| CCNB1    | 5:68488815   | -0.0332 | 0.00466 | 1.14E-12  |
| CCNB1IP1 | 14:20806659  | 0.0564  | 0.00497 | 2.06E-29  |
| CCNE1    | 19:30322427  | -0.0266 | 0.00368 | 5.41E-13  |
| CCNH     | 5:86735368   | 0.0311  | 0.00437 | 1.34E-12  |
| CCNJ     | 10:97850096  | 0.0303  | 0.00483 | 3.91E-10  |
| CCNJL    | 5:159741390  | 0.0582  | 0.00861 | 1.55E-11  |

|          |             |         |         |           |
|----------|-------------|---------|---------|-----------|
| CCNL1    | 3:156896364 | -0.0503 | 0.00318 | 3.92E-55  |
| CCNT1    | 12:49036033 | 0.0267  | 0.00432 | 6.40E-10  |
| CCNT2    | 2:135682094 | -0.04   | 0.00319 | 1.16E-35  |
| CCNY     | 10:35771615 | 0.0547  | 0.00344 | 1.49E-55  |
| CCPG1    | 15:55697964 | -0.0857 | 0.00827 | 6.68E-25  |
| CCR1     | 3:46205686  | -0.218  | 0.00959 | 1.36E-109 |
| CCR2     | 3:46374273  | -0.119  | 0.0103  | 2.17E-30  |
| CCR3     | 3:46289113  | -0.334  | 0.00811 | <1.0E-314 |
| CCR4     | 3:33029986  | 0.0742  | 0.00872 | 2.17E-17  |
| CCR6     | 6:167533062 | 0.0503  | 0.00684 | 2.21E-13  |
| CCS      | 11:66348503 | -0.0538 | 0.00402 | 3.35E-40  |
| CCSAP    | 1:229408995 | -0.121  | 0.003   | <1.0E-314 |
| CCSER2   | 10:86257341 | 0.181   | 0.00498 | 3.75E-259 |
| CCT2     | 12:69985452 | 0.0458  | 0.00423 | 5.37E-27  |
| CCT3     | 1:156274991 | 0.0292  | 0.00374 | 6.43E-15  |
| CCT4     | 2:62057548  | -0.0409 | 0.00445 | 5.93E-20  |
| CCT5     | 5:10261434  | 0.0311  | 0.00504 | 7.63E-10  |
| CCT6A    | 7:56126360  | -0.128  | 0.00422 | 5.22E-185 |
| CCT6B    | 17:33330150 | -0.0314 | 0.00402 | 6.81E-15  |
| CCT7     | 2:73470615  | 0.0638  | 0.00702 | 1.46E-19  |
| CCT8     | 21:30445948 | -0.0844 | 0.00568 | 6.04E-49  |
| CD101    | 1:117567048 | 0.132   | 0.00619 | 1.23E-96  |
| CD109    | 6:74445387  | 0.0197  | 0.00226 | 3.96E-18  |
| CD14     | 5:139978241 | 0.061   | 0.00741 | 2.27E-16  |
| CD151    | 11:823809   | 0.121   | 0.00605 | 3.14E-86  |
| CD160    | 1:145703115 | -0.0631 | 0.0071  | 8.71E-19  |
| CD163L1  | 12:7622509  | 0.0235  | 0.00263 | 6.84E-19  |
| CD177    | 19:43852065 | 0.138   | 0.0145  | 2.36E-21  |
| CD180    | 5:66492725  | 0.0864  | 0.0102  | 2.58E-17  |
| CD1A     | 1:158226667 | 0.0564  | 0.00852 | 3.92E-11  |
| CD1E     | 1:158363687 | -0.156  | 0.026   | 2.40E-09  |
| CD200R1  | 3:112654447 | -0.133  | 0.00574 | 3.46E-113 |
| CD200R1L | 3:112521519 | 0.0548  | 0.00518 | 6.52E-26  |
| CD209    | 19:7783150  | 0.109   | 0.016   | 1.43E-11  |
| CD22     | 19:35837705 | -0.204  | 0.0171  | 3.58E-32  |
| CD226    | 18:67519174 | -0.0477 | 0.00668 | 1.06E-12  |
| CD244    | 1:160840185 | -0.0354 | 0.00512 | 4.93E-12  |
| CD247    | 1:167418468 | -0.0535 | 0.00493 | 3.71E-27  |
| CD274    | 9:5466085   | -0.152  | 0.0146  | 4.47E-25  |



|         |              |         |         |           |
|---------|--------------|---------|---------|-----------|
| CD28    | 2:204592021  | -0.0657 | 0.00695 | 4.38E-21  |
| CD2AP   | 6:47480676   | -0.146  | 0.00659 | 1.36E-104 |
| CD300A  | 17:72469958  | -0.105  | 0.00521 | 7.05E-88  |
| CD300C  | 17:72532568  | 0.0623  | 0.00494 | 5.93E-36  |
| CD300E  | 17:72653890  | 0.0688  | 0.00695 | 6.46E-23  |
| CD300LB | 17:72498108  | -0.297  | 0.021   | 2.00E-44  |
| CD300LD | 17:72564119  | -0.338  | 0.0101  | 1.76E-221 |
| CD300LF | 17:72715382  | 0.0422  | 0.00518 | 4.24E-16  |
| CD33    | 19:51724326  | 0.0375  | 0.00468 | 1.42E-15  |
| CD36    | 7:80318032   | 0.132   | 0.0174  | 4.77E-14  |
| CD37    | 19:49845895  | 0.0678  | 0.00574 | 7.68E-32  |
| CD38    | 4:15738483   | -0.0452 | 0.00557 | 6.24E-16  |
| CD3E    | 11:118176898 | -0.0412 | 0.00692 | 2.84E-09  |
| CD3G    | 11:118230739 | 0.0813  | 0.00888 | 7.92E-20  |
| CD4     | 12:6894164   | -0.048  | 0.00586 | 3.32E-16  |
| CD40    | 20:44747086  | -0.0505 | 0.00441 | 4.53E-30  |
| CD44    | 11:35245287  | 0.0257  | 0.00317 | 7.32E-16  |
| CD47    | 3:107807485  | -0.0311 | 0.00306 | 5.11E-24  |
| CD48    | 1:160654786  | 0.145   | 0.00516 | 1.60E-161 |
| CD5     | 11:60858179  | -0.0549 | 0.00762 | 6.65E-13  |
| CD52    | 1:26666068   | 0.0609  | 0.00777 | 5.53E-15  |
| CD55    | 1:207444928  | 0.175   | 0.00402 | <1.0E-314 |
| CD59    | 11:33755355  | -0.107  | 0.00515 | 7.71E-93  |
| CD6     | 11:60793701  | 0.0423  | 0.00607 | 3.93E-12  |
| CD69    | 12:9909286   | 0.139   | 0.0165  | 3.39E-17  |
| CD72    | 9:35602420   | 0.0466  | 0.00696 | 2.42E-11  |
| CD79B   | 17:62010232  | 0.0393  | 0.00463 | 2.92E-17  |
| CD83    | 6:14089043   | 0.0782  | 0.00845 | 3.04E-20  |
| CD84    | 1:160548247  | -0.125  | 0.00777 | 3.76E-57  |
| CD8A    | 2:87009742   | 0.0352  | 0.00557 | 2.90E-10  |
| CD9     | 12:6280584   | -0.13   | 0.0114  | 4.36E-30  |
| CD93    | 20:23101571  | 0.36    | 0.00906 | 7.89E-302 |
| CD96    | 3:111249002  | -0.0458 | 0.00492 | 1.65E-20  |
| CDA     | 1:20958024   | -0.263  | 0.00849 | 2.08E-193 |
| CDADC1  | 13:49848833  | 0.032   | 0.00425 | 5.96E-14  |
| CDC123  | 10:12309268  | -0.0508 | 0.00521 | 2.47E-22  |
| CDC14A  | 1:100853755  | 0.0969  | 0.00355 | 1.28E-153 |
| CDC16   | 13:114963436 | -0.206  | 0.00507 | <1.0E-314 |
| CDC25B  | 20:3788479   | -0.036  | 0.00358 | 1.35E-23  |

|          |              |         |         |           |
|----------|--------------|---------|---------|-----------|
| CDC26    | 9:116031822  | 0.0613  | 0.00888 | 5.69E-12  |
| CDC42    | 1:22345647   | -0.042  | 0.0046  | 8.52E-20  |
| CDC42BPA | 1:227453739  | 0.0697  | 0.00958 | 3.93E-13  |
| CDC42BPB | 14:103438905 | 0.0283  | 0.00276 | 1.72E-24  |
| CDC42EP1 | 22:37960825  | 0.0474  | 0.00486 | 2.72E-22  |
| CDC42EP3 | 2:37877131   | 0.0888  | 0.0138  | 1.33E-10  |
| CDC42SE1 | 1:151063940  | -0.0306 | 0.00447 | 8.92E-12  |
| CDC5L    | 6:44356303   | 0.0747  | 0.00885 | 4.38E-17  |
| CDC7     | 1:91966406   | 0.0765  | 0.00715 | 1.85E-26  |
| CDCA4    | 14:105498583 | -0.04   | 0.00574 | 3.58E-12  |
| CDCA7L   | 7:21966979   | 0.132   | 0.00798 | 5.00E-60  |
| CDCP1    | 3:45187671   | -0.0178 | 0.00283 | 3.23E-10  |
| CDH1     | 16:68800849  | -0.0644 | 0.0054  | 2.02E-32  |
| CDH2     | 18:25726723  | 0.0968  | 0.00467 | 6.19E-92  |
| CDH23    | 10:73387404  | -0.0436 | 0.00173 | 4.39E-133 |
| CDHR1    | 10:85946204  | -0.0195 | 0.0031  | 3.79E-10  |
| CDHR3    | 7:105593511  | -0.0192 | 0.00272 | 1.84E-12  |
| CDIPT    | 16:29869176  | -0.0387 | 0.00619 | 4.54E-10  |
| CDK10    | 16:89708267  | 0.156   | 0.0115  | 1.27E-41  |
| CDK15    | 2:202687170  | -0.107  | 0.0113  | 5.32E-21  |
| CDK17    | 12:96688389  | 0.0537  | 0.00419 | 4.98E-37  |
| CDK19    | 6:110955566  | -0.0601 | 0.00836 | 7.43E-13  |
| CDK2AP1  | 12:123736084 | -0.265  | 0.00724 | 9.60E-261 |
| CDK5R1   | 17:30790378  | -0.0406 | 0.00337 | 7.79E-33  |
| CDK5RAP3 | 17:46042494  | 0.161   | 0.0182  | 1.57E-18  |
| CDK7     | 5:68574032   | 0.081   | 0.00508 | 6.06E-56  |
| CDK8     | 13:26869939  | -0.167  | 0.0118  | 3.50E-44  |
| CDKL1    | 14:50811025  | 0.078   | 0.00297 | 2.64E-143 |
| CDKN1B   | 12:12890155  | -0.0385 | 0.00635 | 1.39E-09  |
| CDKN2AIP | 4:184363887  | 0.0556  | 0.00382 | 3.80E-47  |
| CDKN2B   | 9:22034267   | 0.029   | 0.00416 | 3.61E-12  |
| CDKN3    | 14:54864797  | 0.0784  | 0.00702 | 1.21E-28  |
| CDON     | 11:125914929 | -0.0346 | 0.00404 | 1.65E-17  |
| CDS2     | 20:5118897   | 0.185   | 0.00414 | <1.0E-314 |
| CDV3     | 3:133316038  | 0.0353  | 0.00481 | 2.67E-13  |
| CEACAM21 | 19:42092815  | 0.114   | 0.00556 | 1.48E-89  |
| CEACAM4  | 19:42127907  | 0.0944  | 0.0082  | 2.69E-30  |
| CEBPZ    | 2:37459670   | 0.0554  | 0.00531 | 3.07E-25  |
| CECR1    | 22:17700284  | 0.0554  | 0.0057  | 3.97E-22  |

|         |              |         |         |           |
|---------|--------------|---------|---------|-----------|
| CECR6   | 22:17598158  | 0.0207  | 0.00327 | 3.01E-10  |
| CELA1   | 12:51723598  | -0.0944 | 0.00484 | 8.37E-82  |
| CENPBD1 | 16:90049307  | -0.0704 | 0.0069  | 3.67E-24  |
| CENPC1  | 4:68400065   | -0.133  | 0.00519 | 5.69E-137 |
| CENPK   | 5:64768677   | -0.603  | 0.0107  | <1.0E-314 |
| CENPP   | 9:95117419   | -0.148  | 0.0057  | 5.34E-141 |
| CENPQ   | 6:49436199   | -0.0707 | 0.00499 | 7.68E-45  |
| CENPV   | 17:16225506  | -0.0813 | 0.00702 | 1.28E-30  |
| CEP104  | 1:3756532    | -0.0831 | 0.00321 | 2.15E-139 |
| CEP112  | 17:64175223  | -0.029  | 0.00425 | 9.94E-12  |
| CEP120  | 5:122761313  | -0.0602 | 0.00348 | 3.67E-65  |
| CEP128  | 14:81413039  | -0.101  | 0.00573 | 4.99E-67  |
| CEP164  | 11:117193619 | -0.0157 | 0.002   | 4.88E-15  |
| CEP170  | 1:243439386  | -0.0678 | 0.0066  | 1.62E-24  |
| CEP19   | 3:196438428  | 0.193   | 0.00774 | 1.85E-129 |
| CEP192  | 18:12945310  | -0.164  | 0.00318 | <1.0E-314 |
| CEP350  | 1:179927135  | 0.0319  | 0.00492 | 9.80E-11  |
| CEP44   | 4:175213931  | 0.0548  | 0.00379 | 1.57E-46  |
| CEP57   | 11:95553079  | -0.0559 | 0.00461 | 1.89E-33  |
| CEP57L1 | 6:109442109  | 0.0416  | 0.00698 | 2.75E-09  |
| CEP63   | 3:134198419  | 0.102   | 0.00466 | 3.10E-102 |
| CEP70   | 3:138278329  | -0.0981 | 0.0132  | 1.47E-13  |
| CEP85   | 1:26559306   | -0.0777 | 0.00425 | 1.67E-72  |
| CEP85L  | 6:119080379  | 0.0551  | 0.00512 | 1.15E-26  |
| CEP89   | 19:33454535  | 0.0592  | 0.00449 | 4.03E-39  |
| CEP95   | 17:62502435  | -0.087  | 0.00859 | 6.70E-24  |
| CEP97   | 3:101441900  | -0.0696 | 0.00426 | 9.77E-59  |
| CEPT1   | 1:111694789  | -0.0359 | 0.00541 | 3.50E-11  |
| CERK    | 22:47135272  | -0.055  | 0.00346 | 1.46E-55  |
| CERKL   | 2:182399486  | 0.105   | 0.00617 | 6.29E-63  |
| CERS3   | 15:101114805 | -0.0635 | 0.00388 | 9.87E-59  |
| CERS4   | 19:8324825   | 0.067   | 0.0095  | 1.99E-12  |
| CERS5   | 12:50541726  | -0.0418 | 0.00377 | 2.59E-28  |
| CERS6   | 2:169280713  | -0.04   | 0.00452 | 1.07E-18  |
| CETN3   | 5:89728310   | 0.0405  | 0.00603 | 2.08E-11  |
| CFD     | 19:871457    | -1.25   | 0.0286  | <1.0E-314 |
| CFDP1   | 16:75420750  | -0.0306 | 0.00462 | 3.66E-11  |
| CFH     | 1:196725939  | -0.0636 | 0.0102  | 4.99E-10  |
| CFL1    | 11:65624562  | -0.0428 | 0.00392 | 1.81E-27  |

|            |              |         |         |           |
|------------|--------------|---------|---------|-----------|
| CFL2       | 14:35184228  | -0.27   | 0.00743 | 8.75E-258 |
| CFLAR      | 2:201982693  | 0.0573  | 0.00535 | 1.58E-26  |
| CGGBP1     | 3:88107179   | -0.162  | 0.00723 | 1.08E-105 |
| CHAF1A     | 19:4393294   | 0.0473  | 0.00347 | 1.32E-41  |
| CHAF1B     | 21:37773867  | -0.0848 | 0.0139  | 9.78E-10  |
| CHCHD2     | 7:56132741   | -0.146  | 0.00721 | 1.73E-87  |
| CHCHD5     | 2:113332271  | -0.0705 | 0.00887 | 2.34E-15  |
| CHD1L      | 1:146694247  | -0.0335 | 0.00342 | 1.79E-22  |
| CHD9       | 16:53327418  | -0.0359 | 0.00466 | 1.44E-14  |
| CHI3L1     | 1:203155882  | 0.569   | 0.012   | <1.0E-314 |
| CHI3L2     | 1:111765671  | -0.212  | 0.00895 | 3.93E-118 |
| CHID1      | 11:918793    | 0.133   | 0.0161  | 2.21E-16  |
| CHKA       | 11:67840155  | 0.0316  | 0.0049  | 1.25E-10  |
| CHKB-CPT1B | 22:51021599  | -0.0762 | 0.00333 | 2.19E-110 |
| CHL1       | 3:283808     | 0.0149  | 0.00234 | 2.08E-10  |
| CHML       | 1:241787568  | 0.0365  | 0.00616 | 3.41E-09  |
| CHMP1A     | 16:89738276  | 0.0283  | 0.00351 | 9.50E-16  |
| CHMP2B     | 3:87321757   | 0.0314  | 0.00417 | 5.64E-14  |
| CHMP3      | 2:86816501   | -0.0266 | 0.004   | 3.33E-11  |
| CHMP4A     | 14:24654489  | -0.0353 | 0.00418 | 3.65E-17  |
| CHMP4B     | 20:32409142  | -0.0888 | 0.00485 | 1.19E-72  |
| CHMP7      | 8:23118503   | 0.0488  | 0.00441 | 3.28E-28  |
| CHN1       | 2:175707817  | 0.0917  | 0.00549 | 3.79E-61  |
| CHN2       | 7:29186576   | 0.141   | 0.00465 | 7.22E-186 |
| CHP1       | 15:41530359  | 0.0512  | 0.00495 | 6.94E-25  |
| CHPF2      | 7:150926775  | 0.0423  | 0.00361 | 2.50E-31  |
| CHPT1      | 12:102091379 | -0.163  | 0.00698 | 1.63E-114 |
| CHRNA3     | 15:78836723  | -0.0198 | 0.00265 | 9.50E-14  |
| CHRNA5     | 15:78843051  | -0.108  | 0.00334 | 2.66E-208 |
| CHRNB2     | 1:154575613  | -0.0483 | 0.0044  | 1.15E-27  |
| CHRNE      | 17:4811761   | -0.0403 | 0.00533 | 5.08E-14  |
| CHST11     | 12:104981594 | -0.059  | 0.0036  | 8.10E-59  |
| CHSY1      | 15:101716797 | 0.163   | 0.00578 | 2.49E-162 |
| CHURC1     | 14:65370389  | 0.114   | 0.00539 | 1.15E-94  |
| CIAO1      | 2:96936254   | -0.021  | 0.00293 | 8.44E-13  |
| CIB1       | 15:90776375  | 0.142   | 0.00449 | 8.47E-201 |
| CIITA      | 16:10961882  | -0.0334 | 0.00565 | 3.53E-09  |
| CIR1       | 2:175261148  | -0.0459 | 0.00768 | 2.39E-09  |
| CIRH1A     | 16:69202908  | -0.0863 | 0.0147  | 4.95E-09  |

|         |              |         |         |           |
|---------|--------------|---------|---------|-----------|
| CISD1   | 10:60054487  | 0.243   | 0.00761 | 2.06E-205 |
| CISD2   | 4:103760250  | 0.0692  | 0.0116  | 2.27E-09  |
| CKAP2   | 13:53040822  | 0.144   | 0.00482 | 1.51E-180 |
| CKAP2L  | 2:113486941  | 0.0228  | 0.00375 | 1.24E-09  |
| CKAP4   | 12:106618665 | 0.143   | 0.02    | 9.15E-13  |
| CKMT2   | 5:80590921   | 0.121   | 0.00535 | 7.84E-109 |
| CKS2    | 9:91963682   | 0.19    | 0.0182  | 2.42E-25  |
| CLASP1  | 2:122225284  | -0.0394 | 0.00591 | 2.87E-11  |
| CLASP2  | 3:33723538   | 0.0401  | 0.00462 | 4.80E-18  |
| CLCA3P  | 1:87091891   | -0.0586 | 0.00457 | 3.86E-37  |
| CLCC1   | 1:109483975  | -0.0358 | 0.00495 | 5.46E-13  |
| CLCN6   | 1:11865816   | -0.111  | 0.00505 | 1.73E-102 |
| CLCN7   | 16:1511758   | 0.0378  | 0.00314 | 5.20E-33  |
| CLDN20  | 6:155551221  | 0.0982  | 0.00734 | 3.29E-40  |
| CLDN23  | 8:8563198    | -0.0286 | 0.0038  | 6.01E-14  |
| CLDN5   | 22:19492200  | -0.0215 | 0.00345 | 5.47E-10  |
| CLDND1  | 3:98245164   | -0.0489 | 0.00686 | 1.21E-12  |
| CLEC10A | 17:7018222   | -0.0478 | 0.00507 | 6.79E-21  |
| CLEC12A | 12:10060125  | -0.765  | 0.0186  | <1.0E-314 |
| CLEC12B | 12:10113258  | -0.635  | 0.00776 | <1.0E-314 |
| CLEC1A  | 12:10202685  | -0.043  | 0.00475 | 2.11E-19  |
| CLEC1B  | 12:10109584  | -0.406  | 0.00971 | <1.0E-314 |
| CLEC2A  | 12:10096086  | -0.247  | 0.0111  | 4.28E-105 |
| CLEC2B  | 12:10007863  | -0.0695 | 0.00574 | 2.79E-33  |
| CLEC2D  | 12:9869271   | 0.0447  | 0.00469 | 2.59E-21  |
| CLEC3B  | 3:45081629   | 0.0377  | 0.00367 | 1.66E-24  |
| CLEC4A  | 12:8280755   | -0.0815 | 0.00566 | 3.93E-46  |
| CLEC4C  | 12:7878685   | -0.45   | 0.00712 | <1.0E-314 |
| CLEC4D  | 12:8668281   | -0.345  | 0.0106  | 1.21E-209 |
| CLEC4E  | 12:8697920   | -0.243  | 0.0107  | 2.21E-109 |
| CLEC4F  | 2:71049117   | -0.195  | 0.00364 | <1.0E-314 |
| CLEC4G  | 19:7778963   | 0.0243  | 0.00356 | 9.29E-12  |
| CLEC5A  | 7:141577186  | -0.114  | 0.0129  | 1.36E-18  |
| CLEC6A  | 12:8605829   | 0.504   | 0.0132  | 2.98E-282 |
| CLEC7A  | 12:10222786  | -0.166  | 0.0078  | 4.76E-96  |
| CLEC9A  | 12:10202685  | -0.326  | 0.00941 | 9.73E-238 |
| CLECL1  | 12:9881125   | 0.199   | 0.00736 | 2.70E-151 |
| CLHC1   | 2:55358675   | -0.403  | 0.00962 | <1.0E-314 |
| CLIC4   | 1:25054223   | -0.0758 | 0.00678 | 1.15E-28  |

|         |              |         |         |           |
|---------|--------------|---------|---------|-----------|
| CLINT1  | 5:157210977  | -0.0287 | 0.00478 | 2.13E-09  |
| CLIP4   | 2:29356669   | -0.0564 | 0.00378 | 2.01E-49  |
| CLK4    | 5:178094484  | 0.146   | 0.00458 | 2.00E-203 |
| CLMN    | 14:95789261  | 0.0687  | 0.00605 | 1.60E-29  |
| CLN5    | 13:77542896  | 0.0323  | 0.00466 | 4.89E-12  |
| CLN6    | 15:68526355  | -0.113  | 0.00333 | 1.68E-229 |
| CLN8    | 8:1709972    | 0.0575  | 0.00466 | 1.32E-34  |
| CLNS1A  | 11:77327368  | 0.14    | 0.0196  | 9.64E-13  |
| CLOCK   | 4:56317656   | -0.0545 | 0.00331 | 3.14E-59  |
| CLPB    | 11:72124325  | 0.0385  | 0.00633 | 1.31E-09  |
| CLPTM1  | 19:45487178  | 0.0538  | 0.00304 | 5.58E-68  |
| CLRN1   | 3:150609382  | -0.0993 | 0.00615 | 3.01E-57  |
| CLSTN1  | 1:9829664    | 0.127   | 0.0167  | 3.03E-14  |
| CLSTN3  | 12:7283646   | 0.0604  | 0.00432 | 1.58E-43  |
| CLTA    | 9:36194569   | 0.0433  | 0.00659 | 5.36E-11  |
| CLTB    | 5:175788920  | -0.075  | 0.00484 | 6.65E-53  |
| CLTCL1  | 22:19154522  | -0.0355 | 0.00289 | 3.18E-34  |
| CLU     | 8:27454682   | -0.0591 | 0.00995 | 3.15E-09  |
| CLUAP1  | 16:3565123   | -0.0364 | 0.0059  | 7.42E-10  |
| CLUHP3  | 16:31697235  | -0.124  | 0.00346 | 7.07E-251 |
| CLYBL   | 13:100310215 | 0.0568  | 0.00795 | 1.03E-12  |
| CMAHP   | 6:25098265   | -0.13   | 0.00478 | 7.00E-153 |
| CMAS    | 12:22243661  | -0.0563 | 0.00644 | 3.01E-18  |
| CMBL    | 5:10286742   | -0.188  | 0.00549 | 3.78E-233 |
| CMC2    | 16:81028511  | -0.0716 | 0.00646 | 3.38E-28  |
| CMIP    | 16:81735012  | 0.0493  | 0.00673 | 2.76E-13  |
| CMKLR1  | 12:108721636 | -0.115  | 0.00643 | 1.32E-69  |
| CMPK1   | 1:47752600   | 0.0236  | 0.00394 | 2.43E-09  |
| CMPK2   | 2:6996862    | -0.0543 | 0.00598 | 1.57E-19  |
| CMSS1   | 3:99906264   | 0.058   | 0.00481 | 4.86E-33  |
| CMTM1   | 16:66557418  | -0.08   | 0.0107  | 8.58E-14  |
| CMTM3   | 16:66629177  | -0.0664 | 0.00838 | 2.76E-15  |
| CMTM6   | 3:32559556   | 0.0261  | 0.00397 | 5.61E-11  |
| CMTM7   | 3:32427326   | 0.129   | 0.0136  | 3.07E-21  |
| CMTM8   | 3:32286791   | -0.132  | 0.00718 | 5.99E-73  |
| CNDP2   | 18:72174023  | 0.105   | 0.00446 | 4.35E-117 |
| CNEP1R1 | 16:50058869  | -0.068  | 0.00946 | 7.48E-13  |
| CNGA1   | 4:47915437   | -0.352  | 0.0115  | 4.25E-188 |
| CNIH    | 14:54890924  | -0.0421 | 0.00562 | 7.37E-14  |

|         |             |         |         |           |
|---------|-------------|---------|---------|-----------|
| CNIH4   | 1:224560371 | 0.108   | 0.00805 | 3.05E-40  |
| CNN2    | 19:1038871  | -0.222  | 0.00835 | 1.46E-145 |
| CNN3    | 1:95389337  | 0.0704  | 0.0111  | 2.46E-10  |
| CNNM3   | 2:97489870  | 0.0402  | 0.00497 | 6.87E-16  |
| CNOT3   | 19:54634143 | 0.0599  | 0.00782 | 2.16E-14  |
| CNOT4   | 7:135198589 | -0.0379 | 0.0046  | 2.10E-16  |
| CNOT6   | 5:179996111 | -0.108  | 0.0051  | 4.07E-95  |
| CNOT6L  | 4:78738705  | -0.0371 | 0.00602 | 7.55E-10  |
| CNPPD1  | 2:220037666 | -0.0592 | 0.0063  | 7.67E-21  |
| CNPY3   | 6:42902508  | -0.0207 | 0.00353 | 4.83E-09  |
| CNPY4   | 7:99745585  | 0.0516  | 0.00793 | 8.47E-11  |
| CNR2    | 1:24204008  | -0.106  | 0.0107  | 7.97E-23  |
| CNRIP1  | 2:68495002  | 0.0557  | 0.0033  | 3.95E-62  |
| CNTD1   | 17:40960253 | 0.0992  | 0.00829 | 1.37E-32  |
| CNTLN   | 9:17325279  | -0.0466 | 0.00738 | 3.01E-10  |
| CNTNAP2 | 7:148000098 | 0.0349  | 0.00259 | 1.05E-40  |
| CNTRL   | 9:123870336 | 0.17    | 0.0278  | 9.57E-10  |
| COA1    | 7:43668087  | -0.102  | 0.00495 | 3.73E-91  |
| COCH    | 14:31328045 | -0.0386 | 0.00407 | 3.90E-21  |
| COG1    | 17:71192663 | 0.0191  | 0.00314 | 1.26E-09  |
| COG3    | 13:46093557 | 0.0523  | 0.00278 | 1.88E-76  |
| COG4    | 16:70584390 | -0.0623 | 0.00324 | 7.42E-80  |
| COG5    | 7:106796537 | -0.173  | 0.00362 | <1.0E-314 |
| COG6    | 13:40215836 | -0.0818 | 0.004   | 1.53E-89  |
| COG8    | 16:69365430 | -0.031  | 0.00301 | 9.22E-25  |
| COL10A1 | 6:116453231 | 0.0284  | 0.00434 | 6.85E-11  |
| COL18A1 | 21:46908008 | 0.0358  | 0.00173 | 6.79E-92  |
| COL5A2  | 2:189913123 | -0.0557 | 0.00858 | 9.19E-11  |
| COL5A3  | 19:10118375 | -0.0178 | 0.00209 | 1.96E-17  |
| COL9A3  | 20:61464760 | 0.0918  | 0.00506 | 1.54E-71  |
| COLQ    | 3:15567137  | -0.0265 | 0.0028  | 4.55E-21  |
| COMM5   | 8:146067054 | 0.0204  | 0.00234 | 4.82E-18  |
| COMM6   | 13:76089580 | 0.0946  | 0.00812 | 5.33E-31  |
| COMT    | 22:19951271 | -0.0257 | 0.00339 | 3.52E-14  |
| COPB1   | 11:14489182 | 0.0771  | 0.00284 | 7.18E-152 |
| COPB2   | 3:139060722 | -0.0268 | 0.00379 | 1.61E-12  |
| COPS3   | 17:17166056 | 0.124   | 0.00468 | 8.22E-146 |
| COPS6   | 7:99726446  | 0.0816  | 0.00917 | 7.29E-19  |
| COPS7A  | 12:6853891  | 0.0544  | 0.0056  | 4.51E-22  |

|         |              |         |         |           |
|---------|--------------|---------|---------|-----------|
| COPS8   | 2:238032491  | 0.0836  | 0.00935 | 5.43E-19  |
| COPZ2   | 17:46163867  | -0.0805 | 0.00725 | 2.70E-28  |
| COQ10B  | 2:198361058  | 0.0277  | 0.00464 | 2.42E-09  |
| COQ2    | 4:84242078   | -0.0863 | 0.00784 | 6.73E-28  |
| COQ6    | 14:74451315  | 0.0281  | 0.00409 | 7.21E-12  |
| COQ7    | 16:19105138  | -0.126  | 0.0105  | 2.96E-32  |
| COQ9    | 16:57445376  | -0.0265 | 0.00378 | 2.64E-12  |
| CORIN   | 4:47833295   | -0.124  | 0.00304 | <1.0E-314 |
| CORO1C  | 12:109158025 | -0.0806 | 0.00526 | 6.18E-52  |
| CORO2A  | 9:100958924  | -0.0902 | 0.00868 | 4.43E-25  |
| CORO2B  | 15:68923210  | 0.0211  | 0.00306 | 5.35E-12  |
| COTL1   | 16:84599070  | -0.0833 | 0.00531 | 3.55E-54  |
| COX10   | 17:13972860  | -0.0897 | 0.013   | 6.82E-12  |
| COX11   | 17:53041890  | 0.0882  | 0.00626 | 2.79E-44  |
| COX14   | 12:50528977  | -0.0587 | 0.00776 | 4.53E-14  |
| COX15   | 10:101474499 | -0.0453 | 0.00354 | 6.87E-37  |
| COX18   | 4:73922549   | -0.035  | 0.00571 | 9.27E-10  |
| COX4I1  | 16:85838916  | -0.0445 | 0.00437 | 3.79E-24  |
| COX6B1  | 19:36157167  | -0.0535 | 0.00365 | 1.03E-47  |
| COX6C   | 8:100843414  | -0.385  | 0.00754 | <1.0E-314 |
| COX7A2  | 6:75910031   | 0.451   | 0.0446  | 8.22E-24  |
| COX7A2L | 2:42591387   | 0.0441  | 0.00427 | 1.11E-24  |
| CPA3    | 3:148628004  | 0.174   | 0.0271  | 1.50E-10  |
| CPA5    | 7:130006808  | -0.0611 | 0.00345 | 2.61E-68  |
| CPAMD8  | 19:17118433  | 0.014   | 0.00239 | 4.70E-09  |
| CPB1    | 3:148546321  | -0.0473 | 0.00473 | 2.89E-23  |
| CPD     | 17:28667282  | 0.0816  | 0.00492 | 3.39E-60  |
| CPEB2   | 4:15077693   | 0.0879  | 0.00406 | 1.73E-99  |
| CPEB3   | 10:93879078  | 0.0344  | 0.00353 | 2.39E-22  |
| CPEB4   | 5:173305432  | -0.0676 | 0.00431 | 2.95E-54  |
| CPED1   | 7:120648485  | -0.248  | 0.00896 | 1.32E-157 |
| CPM     | 12:69331714  | -0.0425 | 0.00517 | 2.27E-16  |
| CPNE1   | 20:34218673  | 0.118   | 0.0037  | 3.47E-206 |
| CPNE3   | 8:87573853   | -0.0381 | 0.00571 | 2.68E-11  |
| CPNE8   | 12:39145545  | -0.203  | 0.0303  | 2.29E-11  |
| CPOX    | 3:98302932   | -0.0649 | 0.00371 | 8.15E-67  |
| CPPED1  | 16:12897395  | -0.112  | 0.00636 | 1.74E-67  |
| CPQ     | 8:97749564   | 0.0544  | 0.00528 | 1.06E-24  |
| CPSF1   | 8:145627556  | 0.0954  | 0.00738 | 1.30E-37  |



|            |              |         |         |           |
|------------|--------------|---------|---------|-----------|
| CPSF2      | 14:92587277  | -0.0639 | 0.00323 | 6.50E-84  |
| CPSF3      | 2:9654601    | -0.0361 | 0.00611 | 3.61E-09  |
| CPSF6      | 12:69655167  | -0.0336 | 0.00319 | 1.36E-25  |
| CPVL       | 7:29187946   | -0.129  | 0.00595 | 4.06E-100 |
| CR1        | 1:207673631  | 0.0591  | 0.00608 | 3.60E-22  |
| CR2        | 1:207655815  | -0.0471 | 0.00677 | 4.04E-12  |
| CRAT       | 9:131894934  | 0.0823  | 0.00329 | 5.33E-131 |
| CRBN       | 3:3192524    | 0.0399  | 0.00331 | 4.60E-33  |
| CRCP       | 7:65570310   | -0.091  | 0.00669 | 2.04E-41  |
| CREB1      | 2:208371637  | -0.0402 | 0.00419 | 1.29E-21  |
| CREB5      | 7:28724374   | 0.115   | 0.00703 | 1.08E-58  |
| CREG1      | 1:167516862  | -0.119  | 0.00835 | 2.65E-45  |
| CRELD2     | 22:50316797  | -0.11   | 0.00573 | 1.63E-79  |
| CREM       | 10:35514002  | 0.0429  | 0.0045  | 2.59E-21  |
| CRIM1      | 2:36789166   | 0.0788  | 0.00299 | 7.32E-144 |
| CRIP3      | 6:43260008   | 0.0298  | 0.00305 | 1.99E-22  |
| CRIPAK     | 4:1341553    | -1.22   | 0.0509  | 4.41E-120 |
| CRIPT      | 2:46849495   | 0.0887  | 0.00436 | 1.72E-88  |
| CRISP2     | 6:49669359   | -0.225  | 0.0195  | 2.43E-30  |
| CRISP3     | 6:49674612   | 0.114   | 0.0124  | 6.59E-20  |
| CRISPLD2   | 16:84845034  | 0.154   | 0.00697 | 1.08E-103 |
| CRK        | 17:1323238   | 0.108   | 0.0143  | 4.94E-14  |
| CRLF3      | 17:29078224  | 0.096   | 0.00527 | 5.76E-72  |
| CRNKL1     | 20:20033755  | -0.0363 | 0.00262 | 8.66E-43  |
| CROCCP3    | 1:16786928   | -0.0378 | 0.00606 | 4.65E-10  |
| CROT       | 7:86928387   | -0.0427 | 0.00478 | 5.68E-19  |
| CRTAM      | 11:122714782 | -0.072  | 0.00631 | 8.17E-30  |
| CRY1       | 12:107448333 | 0.0281  | 0.00425 | 4.66E-11  |
| CRY2       | 11:45846619  | -0.0215 | 0.00269 | 1.60E-15  |
| CRYM       | 16:21272591  | 0.0357  | 0.00356 | 1.56E-23  |
| CRYZ       | 1:75193264   | -0.373  | 0.00771 | <1.0E-314 |
| CSAD       | 12:53547987  | 0.0247  | 0.00402 | 7.89E-10  |
| CSDA       | 12:10870900  | 0.127   | 0.0103  | 2.95E-34  |
| CSF1R      | 5:149483427  | 0.0567  | 0.00666 | 2.40E-17  |
| CSF2RB     | 22:37269541  | -0.0613 | 0.00631 | 4.28E-22  |
| CSF3R      | 1:36940615   | 0.143   | 0.0191  | 8.66E-14  |
| CSGALNACT1 | 8:19564149   | 0.228   | 0.00562 | <1.0E-314 |
| CSGALNACT2 | 10:43647868  | -0.0513 | 0.00481 | 3.19E-26  |
| CSK        | 15:75057747  | 0.0369  | 0.0032  | 1.94E-30  |

|           |             |         |         |           |
|-----------|-------------|---------|---------|-----------|
| CSMD1     | 8:2970477   | -0.0154 | 0.00223 | 5.98E-12  |
| CSNK1A1L  | 13:37679729 | 0.0402  | 0.00368 | 1.63E-27  |
| CSNK1G1   | 15:64650273 | -0.0358 | 0.00448 | 1.60E-15  |
| CSNK1G3   | 5:122818269 | -0.0353 | 0.00457 | 1.32E-14  |
| CSNK2B    | 6:31637807  | -0.084  | 0.00406 | 1.69E-91  |
| CSRP2     | 12:51503442 | 0.0278  | 0.00429 | 9.18E-11  |
| CSRP2BP   | 20:18120761 | -0.0423 | 0.00317 | 5.85E-40  |
| CST7      | 20:24930085 | 0.197   | 0.00908 | 1.19E-99  |
| CSTA      | 3:122055495 | 0.158   | 0.00817 | 7.83E-81  |
| CSTB      | 21:45201832 | -0.106  | 0.00322 | 5.75E-217 |
| CSTF2T    | 10:53452245 | 0.0757  | 0.00635 | 2.38E-32  |
| CSTF3     | 11:33118137 | -0.054  | 0.00394 | 5.97E-42  |
| CTAGE5    | 14:39850261 | 0.0315  | 0.00359 | 2.36E-18  |
| CTBP1     | 4:1198957   | -0.0219 | 0.00237 | 3.04E-20  |
| CTBP1-AS1 | 4:1240636   | 0.109   | 0.00715 | 3.41E-51  |
| CTBS      | 1:85064272  | 0.076   | 0.00698 | 2.65E-27  |
| CTC1      | 17:8142129  | 0.0908  | 0.00346 | 1.59E-142 |
| CTDP1     | 18:77492750 | -0.0237 | 0.00254 | 1.47E-20  |
| CTGF      | 6:132320848 | -0.0194 | 0.00319 | 1.20E-09  |
| CTH       | 1:70876758  | 0.0456  | 0.00374 | 9.61E-34  |
| CTHRC1    | 8:104431198 | -0.0509 | 0.00501 | 5.65E-24  |
| CTNNA1    | 5:138085286 | 0.136   | 0.00397 | 2.44E-231 |
| CTNNA3    | 10:69264209 | -0.0664 | 0.00897 | 1.58E-13  |
| CTNNAL1   | 9:111680359 | -0.504  | 0.0336  | 1.09E-49  |
| CTNNB1    | 3:41260402  | 0.0572  | 0.00275 | 1.12E-92  |
| CTNND1    | 11:57537787 | 0.0268  | 0.00396 | 1.58E-11  |
| CTNS      | 17:3564836  | 0.0439  | 0.00509 | 8.39E-18  |
| CTPS1     | 1:41446231  | 0.0447  | 0.00412 | 3.87E-27  |
| CTSA      | 20:44501934 | -0.032  | 0.00423 | 5.18E-14  |
| CTSB      | 8:11720502  | 0.227   | 0.026   | 3.28E-18  |
| CTSC      | 11:88071498 | 0.149   | 0.00518 | 4.63E-170 |
| CTSD      | 11:1769843  | 0.105   | 0.00859 | 4.94E-34  |
| CTSF      | 11:66335832 | -0.0181 | 0.00261 | 4.44E-12  |
| CTSG      | 14:25045589 | -0.201  | 0.016   | 1.05E-35  |
| CTSH      | 15:79233792 | 0.322   | 0.014   | 1.10E-111 |
| CTSK      | 1:150772613 | -0.116  | 0.00749 | 2.25E-53  |
| CTSL1     | 9:90342675  | 0.195   | 0.00788 | 2.27E-127 |
| CTSS      | 1:150737565 | 0.0294  | 0.00415 | 1.73E-12  |
| CTSW      | 11:65654665 | 0.285   | 0.00848 | 2.72E-224 |

|            |              |         |         |           |
|------------|--------------|---------|---------|-----------|
| CTSZ       | 20:57574841  | -0.0383 | 0.00472 | 5.70E-16  |
| CUBN       | 10:17175484  | -0.168  | 0.00397 | <1.0E-314 |
| CUL2       | 10:35355402  | 0.0426  | 0.0032  | 6.39E-40  |
| CUL7       | 6:43008876   | 0.0566  | 0.00461 | 3.14E-34  |
| CUZD1      | 10:124638827 | 0.032   | 0.00493 | 9.27E-11  |
| CWC25      | 17:36991976  | -0.0355 | 0.00358 | 5.99E-23  |
| CWF19L1    | 10:101953705 | -0.0888 | 0.00336 | 1.88E-144 |
| CWF19L2    | 11:107273938 | 0.0809  | 0.00559 | 1.64E-46  |
| CXCL1      | 4:74735244   | 0.0501  | 0.00744 | 1.85E-11  |
| CXCL16     | 17:4640869   | 0.115   | 0.00544 | 6.03E-96  |
| CXCL5      | 4:74857970   | -0.185  | 0.00702 | 9.88E-144 |
| CXCR2P1    | 2:218970736  | -0.097  | 0.00609 | 9.82E-56  |
| CXCR7      | 2:237445326  | 0.0656  | 0.0108  | 1.13E-09  |
| CYB5A      | 18:71948257  | -0.0649 | 0.0101  | 1.54E-10  |
| CYB5B      | 16:69497203  | 0.039   | 0.00574 | 1.28E-11  |
| CYB5D2     | 17:4038014   | -0.0268 | 0.00445 | 1.71E-09  |
| CYB5R1     | 1:202967764  | -0.0371 | 0.00583 | 2.20E-10  |
| CYB5R2     | 11:7692051   | -0.0591 | 0.00464 | 1.09E-36  |
| CYB5R3     | 22:43022832  | 0.0617  | 0.00556 | 2.84E-28  |
| CYBA       | 16:88710882  | -0.089  | 0.00353 | 7.20E-133 |
| CYBRD1     | 2:172369069  | 0.243   | 0.0065  | 9.05E-272 |
| CYCS       | 7:25163744   | -0.138  | 0.0109  | 2.24E-36  |
| CYFIP2     | 5:156769649  | -0.0369 | 0.00588 | 3.66E-10  |
| CYLD       | 16:50727075  | 0.0383  | 0.00319 | 9.46E-33  |
| CYP1B1     | 2:38351969   | -0.135  | 0.0102  | 3.72E-39  |
| CYP1B1-AS1 | 2:38416531   | -0.0303 | 0.00434 | 3.32E-12  |
| CYP26B1    | 2:72403408   | -0.0851 | 0.00419 | 1.92E-88  |
| CYP27A1    | 2:219597185  | -0.294  | 0.00538 | <1.0E-314 |
| CYP2B7P1   | 19:41415087  | -0.0872 | 0.00762 | 6.17E-30  |
| CYP2R1     | 11:14861517  | 0.0521  | 0.00516 | 1.09E-23  |
| CYP2U1     | 4:108877783  | 0.0487  | 0.0045  | 5.00E-27  |
| CYP4F12    | 19:15776028  | -0.0896 | 0.00595 | 3.40E-50  |
| CYP4F22    | 19:15632989  | -0.176  | 0.027   | 6.97E-11  |
| CYP4F3     | 19:15749169  | -0.109  | 0.00847 | 3.62E-37  |
| CYP4V2     | 4:187099609  | -0.141  | 0.00531 | 1.15E-146 |
| CYP51A1    | 7:91749798   | 0.258   | 0.00771 | 1.72E-222 |
| CYSTM1     | 5:139665761  | 0.0573  | 0.00788 | 3.92E-13  |
| CYTH2      | 19:48986144  | 0.0941  | 0.0118  | 2.16E-15  |
| CYTH4      | 22:37678378  | -0.0419 | 0.00375 | 9.31E-29  |

|         |              |         |         |           |
|---------|--------------|---------|---------|-----------|
| CYYR1   | 21:27973726  | -0.0338 | 0.00402 | 4.92E-17  |
| DAAM2   | 6:39712340   | -0.0451 | 0.00731 | 7.05E-10  |
| DAD1    | 14:23058084  | -0.231  | 0.00483 | <1.0E-314 |
| DAGLB   | 7:6456091    | -0.0715 | 0.00396 | 6.93E-71  |
| DALRD3  | 3:49030828   | -0.0326 | 0.003   | 2.77E-27  |
| DAP     | 5:10676209   | 0.0555  | 0.00413 | 1.22E-40  |
| DAP3    | 1:155614815  | 0.0357  | 0.00455 | 5.14E-15  |
| DAPK1   | 9:90167240   | -0.218  | 0.00538 | <1.0E-314 |
| DAPK2   | 15:64279053  | -0.0607 | 0.00459 | 2.60E-39  |
| DAPP1   | 4:100760165  | 0.0668  | 0.00504 | 1.55E-39  |
| DARC    | 1:159174920  | -0.0543 | 0.0044  | 1.44E-34  |
| DARS    | 2:136773803  | -0.278  | 0.0251  | 3.23E-28  |
| DAXX    | 6:33290402   | 0.0232  | 0.00358 | 1.02E-10  |
| DAZAP2  | 12:51641035  | -0.0336 | 0.00386 | 4.32E-18  |
| DBF4B   | 17:42773081  | 0.0561  | 0.00298 | 1.11E-76  |
| DBI     | 2:120120771  | 0.0479  | 0.00488 | 1.43E-22  |
| DBIL5P2 | 2:63328774   | -0.141  | 0.00922 | 1.69E-51  |
| DBN1    | 5:176875956  | 0.0201  | 0.0025  | 1.25E-15  |
| DBNL    | 7:44082764   | 0.0278  | 0.00449 | 6.97E-10  |
| DCAF10  | 9:37854274   | 0.275   | 0.00749 | 8.89E-263 |
| DCAF13  | 8:104410420  | 0.028   | 0.00361 | 1.17E-14  |
| DCAF4   | 14:73393391  | -0.0985 | 0.00497 | 2.61E-84  |
| DCAKD   | 17:43093021  | 0.0506  | 0.00383 | 3.45E-39  |
| DCBLD1  | 6:117791163  | 0.209   | 0.00531 | 5.95E-298 |
| DCBLD2  | 3:98661631   | -0.102  | 0.00622 | 2.17E-59  |
| DCHS1   | 11:6679132   | -0.0228 | 0.00377 | 1.53E-09  |
| DCK     | 4:71860311   | -0.213  | 0.0297  | 7.69E-13  |
| DCLK2   | 4:151049132  | -0.0544 | 0.004   | 2.29E-41  |
| DCP1A   | 3:53271193   | -0.203  | 0.0196  | 6.09E-25  |
| DCP1B   | 12:2064575   | 0.0895  | 0.00806 | 2.30E-28  |
| DCP2    | 5:112326410  | 0.0768  | 0.00322 | 7.81E-120 |
| DCPS    | 11:126156979 | 0.0457  | 0.00394 | 1.10E-30  |
| DCTD    | 4:183820557  | -0.0536 | 0.00475 | 3.21E-29  |
| DCTN5   | 16:23653343  | -0.223  | 0.00484 | <1.0E-314 |
| DCTN6   | 8:30049102   | -0.081  | 0.0079  | 1.98E-24  |
| DCUN1D2 | 13:114171794 | -0.0587 | 0.00568 | 7.32E-25  |
| DCUN1D4 | 4:52788822   | 0.0434  | 0.00457 | 3.44E-21  |
| DCXR    | 17:79993003  | -0.138  | 0.00497 | 2.14E-157 |
| DDA1    | 19:17426171  | -0.054  | 0.00654 | 1.91E-16  |

|         |              |         |         |           |
|---------|--------------|---------|---------|-----------|
| DDAH1   | 1:85749715   | -0.0369 | 0.00435 | 2.99E-17  |
| DDAH2   | 6:31697957   | -0.0329 | 0.00458 | 7.57E-13  |
| DDB2    | 11:47263060  | 0.06    | 0.00483 | 6.56E-35  |
| DDHD2   | 8:38107873   | -0.0646 | 0.00517 | 2.43E-35  |
| DDI2    | 1:15921899   | 0.0848  | 0.00667 | 1.72E-36  |
| DDO     | 6:110738291  | 0.0307  | 0.00346 | 9.26E-19  |
| DDOST   | 1:20983863   | 0.027   | 0.00356 | 4.01E-14  |
| DDR1    | 6:30892999   | -0.0208 | 0.00221 | 7.32E-21  |
| DDRGK1  | 20:3155375   | 0.0454  | 0.00346 | 1.01E-38  |
| DDT     | 22:24335228  | 0.306   | 0.0162  | 3.11E-77  |
| DDX1    | 2:15729583   | -0.0239 | 0.003   | 1.95E-15  |
| DDX10   | 11:108591328 | -0.0544 | 0.00664 | 3.09E-16  |
| DDX17   | 22:38879688  | -0.0261 | 0.00224 | 6.73E-31  |
| DDX18   | 2:118596654  | -0.0544 | 0.0043  | 3.06E-36  |
| DDX20   | 1:112279555  | 0.0569  | 0.00706 | 9.30E-16  |
| DDX23   | 12:49236156  | 0.0314  | 0.00391 | 1.04E-15  |
| DDX27   | 20:47908060  | -0.0237 | 0.00373 | 2.23E-10  |
| DDX31   | 9:135488542  | -0.0206 | 0.00265 | 8.88E-15  |
| DDX39B  | 6:31509779   | 0.0338  | 0.00284 | 2.87E-32  |
| DDX43   | 6:74127543   | -0.146  | 0.0214  | 8.77E-12  |
| DDX5    | 17:62502435  | 0.0981  | 0.00674 | 3.73E-47  |
| DDX50   | 10:70670776  | 0.0406  | 0.00622 | 7.13E-11  |
| DDX52   | 17:36002599  | 0.0438  | 0.00522 | 5.92E-17  |
| DDX55   | 12:124069614 | 0.0857  | 0.00491 | 2.18E-66  |
| DDX56   | 7:44612753   | -0.0436 | 0.00322 | 5.56E-41  |
| DDX59   | 1:200645101  | 0.091   | 0.0036  | 7.13E-133 |
| DECR1   | 8:91018214   | 0.213   | 0.0142  | 1.10E-49  |
| DEF6    | 6:35236915   | 0.0624  | 0.003   | 1.23E-92  |
| DEFA4   | 8:6789291    | -0.199  | 0.0322  | 7.15E-10  |
| DEGS1   | 1:224424442  | -0.136  | 0.00942 | 2.33E-46  |
| DEK     | 6:18262906   | -0.0412 | 0.0036  | 6.13E-30  |
| DENND1A | 9:126641091  | 0.0886  | 0.00512 | 2.98E-65  |
| DENND2C | 1:115212525  | -0.053  | 0.00715 | 1.41E-13  |
| DENND2D | 1:111729325  | 0.043   | 0.00456 | 6.08E-21  |
| DENND4A | 15:65998702  | 0.0796  | 0.00575 | 9.08E-43  |
| DENND4C | 9:19227803   | 0.0347  | 0.0036  | 9.27E-22  |
| DENND5A | 11:9270700   | -0.0357 | 0.00429 | 1.01E-16  |
| DENND5B | 12:31647153  | 0.0421  | 0.00446 | 5.41E-21  |
| DENND6A | 3:57692917   | -0.0841 | 0.00405 | 3.71E-92  |

|            |              |         |         |           |
|------------|--------------|---------|---------|-----------|
| DEPDC5     | 22:32182708  | -0.0289 | 0.00322 | 3.97E-19  |
| DEPDC7     | 11:33057988  | -0.0369 | 0.00315 | 3.19E-31  |
| DEPTOR     | 8:120901797  | 0.0424  | 0.00397 | 2.51E-26  |
| DERL1      | 8:124043301  | 0.0243  | 0.00403 | 1.79E-09  |
| DFNB31     | 9:117261987  | -0.0162 | 0.00195 | 9.08E-17  |
| DGAT2      | 11:75561128  | 0.0513  | 0.00602 | 2.21E-17  |
| DGCR2      | 22:19099813  | 0.0311  | 0.00333 | 1.75E-20  |
| DGCR8      | 22:20090192  | -0.042  | 0.00371 | 2.40E-29  |
| DGKA       | 12:56313676  | -0.0515 | 0.0077  | 2.53E-11  |
| DGKE       | 17:54883437  | -0.0518 | 0.00828 | 4.24E-10  |
| DHCR24     | 1:55373374   | -0.0364 | 0.00523 | 4.20E-12  |
| DHDDS      | 1:26805002   | 0.0284  | 0.00451 | 3.10E-10  |
| DHRS1      | 14:24751184  | -0.0895 | 0.00956 | 1.12E-20  |
| DHRS12     | 13:52423280  | 0.049   | 0.005   | 1.55E-22  |
| DHRS3      | 1:12649332   | 0.046   | 0.00612 | 6.76E-14  |
| DHRS4      | 14:24439932  | 0.0956  | 0.0139  | 6.14E-12  |
| DHRS7      | 14:60604297  | 0.0567  | 0.00878 | 1.15E-10  |
| DHRS9      | 2:169961897  | 0.194   | 0.00635 | 5.44E-188 |
| DHTKD1     | 10:12111784  | -0.0282 | 0.00393 | 8.26E-13  |
| DHX32      | 10:127596596 | 0.13    | 0.00431 | 3.04E-183 |
| DHX34      | 19:47899522  | -0.0427 | 0.00626 | 1.04E-11  |
| DHX35      | 20:37593743  | 0.063   | 0.00393 | 2.31E-56  |
| DHX36      | 3:154021063  | -0.0307 | 0.00377 | 4.07E-16  |
| DHX57      | 2:39102671   | 0.0651  | 0.00372 | 8.90E-67  |
| DHX58      | 17:40264661  | 0.0394  | 0.00386 | 3.18E-24  |
| DICER1     | 14:95594687  | 0.0401  | 0.00361 | 2.58E-28  |
| DICER1-AS1 | 14:95648424  | 0.0578  | 0.00548 | 9.42E-26  |
| DIDO1      | 20:61533039  | 0.0801  | 0.00361 | 2.60E-104 |
| DIEXF      | 1:210001586  | 0.105   | 0.00335 | 1.21E-196 |
| DIMT1      | 5:61719506   | -0.0396 | 0.00333 | 3.41E-32  |
| DIP2A      | 21:47833789  | -0.138  | 0.00341 | <1.0E-314 |
| DIP2B      | 12:51130207  | 0.0423  | 0.00365 | 9.73E-31  |
| DIP2C      | 10:529144    | -0.042  | 0.00373 | 3.94E-29  |
| DIRC2      | 3:122480238  | 0.243   | 0.00853 | 8.90E-166 |
| DIS3       | 13:73341704  | 0.0222  | 0.0034  | 6.28E-11  |
| DIS3L      | 15:66572692  | -0.145  | 0.00896 | 9.83E-58  |
| DIS3L2     | 2:232827254  | -0.0306 | 0.00489 | 4.56E-10  |
| DISC1      | 1:231773397  | -0.108  | 0.00332 | 3.13E-211 |
| DIXDC1     | 11:111897050 | -0.0354 | 0.00353 | 1.94E-23  |

|                |              |         |         |           |
|----------------|--------------|---------|---------|-----------|
| DKFZP686I15217 | 6:2940666    | 0.025   | 0.00366 | 8.76E-12  |
| DKK3           | 11:12017400  | 0.113   | 0.0102  | 6.52E-28  |
| DLAT           | 11:111933088 | 0.0225  | 0.00335 | 1.99E-11  |
| DLEU2          | 13:50610989  | -0.135  | 0.00873 | 1.12E-52  |
| DLEU7          | 13:51293037  | 0.0343  | 0.00434 | 3.53E-15  |
| DLG5           | 10:79617980  | 0.0675  | 0.00254 | 3.37E-146 |
| DLGAP5         | 14:55653306  | 0.0965  | 0.0104  | 3.13E-20  |
| DLST           | 14:75317699  | 0.0361  | 0.00536 | 1.86E-11  |
| DMXL2          | 15:51914033  | -0.0892 | 0.00537 | 2.30E-60  |
| DNAAF2         | 14:50112712  | -0.117  | 0.00567 | 2.35E-91  |
| DNAH6          | 2:84709215   | 0.114   | 0.00371 | 7.98E-192 |
| DNAH7          | 2:196887188  | -0.0365 | 0.00186 | 3.21E-83  |
| DNAJA3         | 16:4479734   | -0.0433 | 0.00299 | 1.12E-46  |
| DNAJA4         | 15:78569930  | 0.11    | 0.00851 | 2.03E-37  |
| DNAJB1         | 19:14618185  | -0.0945 | 0.00748 | 3.93E-36  |
| DNAJB13        | 11:73682867  | -0.0426 | 0.00427 | 2.74E-23  |
| DNAJB2         | 2:220140796  | -0.0384 | 0.00557 | 5.70E-12  |
| DNAJB5         | 9:35013174   | -0.189  | 0.0112  | 3.37E-62  |
| DNAJB6         | 7:157145474  | -0.0887 | 0.00528 | 9.00E-62  |
| DNAJB7         | 22:41256802  | 0.0381  | 0.00604 | 3.08E-10  |
| DNAJB9         | 7:108211586  | 0.0343  | 0.00412 | 1.08E-16  |
| DNAJC11        | 1:6771569    | 0.0273  | 0.00418 | 6.72E-11  |
| DNAJC13        | 3:132183991  | -0.094  | 0.0125  | 7.40E-14  |
| DNAJC15        | 13:43608754  | -0.242  | 0.00544 | <1.0E-314 |
| DNAJC18        | 5:138773874  | 0.0553  | 0.00512 | 5.99E-27  |
| DNAJC19        | 3:180702240  | 0.0431  | 0.00679 | 2.41E-10  |
| DNAJC21        | 5:34948532   | 0.0342  | 0.00462 | 1.48E-13  |
| DNAJC8         | 1:28518264   | 0.0518  | 0.00863 | 2.05E-09  |
| DNAJC9         | 10:75008561  | 0.258   | 0.023   | 1.10E-28  |
| DNASE1L3       | 3:58199534   | 0.0747  | 0.00538 | 5.25E-43  |
| DNASE2         | 19:12998205  | 0.0863  | 0.00481 | 7.65E-70  |
| DNHD1          | 11:6530278   | -0.046  | 0.00347 | 1.68E-39  |
| DNM2           | 19:10939792  | 0.0222  | 0.00285 | 8.12E-15  |
| DNMBP          | 10:101697047 | 0.135   | 0.0162  | 1.06E-16  |
| DNPEP          | 2:220263811  | -0.167  | 0.0163  | 2.01E-24  |
| DNTTIP1        | 20:44404647  | 0.0363  | 0.00297 | 8.49E-34  |
| DNTTIP2        | 1:94339851   | -0.222  | 0.0346  | 1.50E-10  |
| DOCK10         | 2:225755912  | -0.0721 | 0.00626 | 2.30E-30  |
| DOCK7          | 1:62993403   | 0.102   | 0.00365 | 1.07E-161 |

|           |              |         |         |           |
|-----------|--------------|---------|---------|-----------|
| DOCK8     | 9:370199     | -0.0831 | 0.0048  | 2.84E-65  |
| DOCK9     | 13:99550351  | -0.0737 | 0.00597 | 1.65E-34  |
| DOK2      | 8:21762915   | 0.0366  | 0.00395 | 2.59E-20  |
| DOK4      | 16:57511407  | -0.0553 | 0.00751 | 2.05E-13  |
| DOK6      | 18:67531642  | 0.0757  | 0.00315 | 5.57E-121 |
| DOM3Z     | 6:31938412   | 0.102   | 0.00589 | 5.57E-66  |
| DOPEY1    | 6:83843781   | 0.154   | 0.00441 | 1.13E-240 |
| DOPEY2    | 21:37620240  | -0.0497 | 0.0035  | 5.26E-45  |
| DPAGT1    | 11:118973133 | 0.0299  | 0.00376 | 2.27E-15  |
| DPEP2     | 16:68039309  | -0.0502 | 0.00606 | 1.46E-16  |
| DPEP3     | 16:68036939  | 0.0451  | 0.00635 | 1.47E-12  |
| DPH1      | 17:1942861   | 0.0231  | 0.00276 | 7.12E-17  |
| DPH3      | 3:16293425   | 0.0472  | 0.00662 | 1.13E-12  |
| DPM2      | 9:130722212  | -0.115  | 0.0131  | 1.45E-18  |
| DPP4      | 2:162930725  | -0.0564 | 0.00696 | 6.98E-16  |
| DPP7      | 9:140024587  | 0.0735  | 0.00929 | 3.05E-15  |
| DPPA4     | 3:109061221  | -0.0545 | 0.00652 | 8.78E-17  |
| DPY19L2P2 | 7:102787381  | -0.389  | 0.0194  | 1.65E-86  |
| DPY19L3   | 19:32925370  | -0.11   | 0.00637 | 2.76E-65  |
| DPY19L4   | 8:95763759   | 0.0756  | 0.0111  | 1.01E-11  |
| DPYSL4    | 10:133969872 | -0.0286 | 0.00266 | 1.13E-26  |
| DR1       | 1:93816400   | -0.122  | 0.00337 | 6.00E-255 |
| DRAM2     | 1:111728610  | -0.116  | 0.00474 | 1.03E-125 |
| DSC1      | 18:28737770  | 0.102   | 0.00578 | 2.35E-67  |
| DSC2      | 18:28724903  | 0.0788  | 0.0106  | 9.67E-14  |
| DSCC1     | 8:120868138  | -0.0874 | 0.00509 | 3.29E-64  |
| DSE       | 6:116795040  | 0.128   | 0.0046  | 1.10E-159 |
| DSN1      | 20:35404978  | 0.126   | 0.0202  | 4.90E-10  |
| DSP       | 6:7495948    | -0.139  | 0.00357 | 9.88E-292 |
| DST       | 6:56290054   | -0.0243 | 0.00375 | 9.28E-11  |
| DSTN      | 20:17627727  | -0.0501 | 0.00524 | 1.63E-21  |
| DSTYK     | 1:205138321  | -0.101  | 0.0108  | 1.16E-20  |
| DTD1      | 20:18552359  | 0.0622  | 0.00469 | 1.86E-39  |
| DTNB      | 2:25860320   | 0.0236  | 0.00329 | 9.14E-13  |
| DTNBP1    | 6:15662891   | -0.0837 | 0.0044  | 3.94E-78  |
| DTWD1     | 15:49968752  | -0.0613 | 0.00508 | 4.70E-33  |
| DTWD2     | 5:118315744  | 0.0454  | 0.00523 | 5.04E-18  |
| DTX2      | 7:76135340   | 0.107   | 0.0169  | 3.32E-10  |
| DUOX1     | 15:45459564  | 0.0218  | 0.00268 | 4.54E-16  |



|          |              |         |         |           |
|----------|--------------|---------|---------|-----------|
| DUS2L    | 16:68127846  | -0.158  | 0.00844 | 2.66E-75  |
| DUS3L    | 19:5799806   | 0.0313  | 0.00314 | 2.92E-23  |
| DUSP10   | 1:221917338  | 0.0411  | 0.00478 | 1.03E-17  |
| DUSP12   | 1:161721707  | 0.0305  | 0.00406 | 6.56E-14  |
| DUSP14   | 17:35817105  | -0.0277 | 0.00394 | 2.14E-12  |
| DUSP16   | 12:12617006  | 0.0831  | 0.00683 | 1.45E-33  |
| DUSP18   | 22:31063804  | 0.176   | 0.00544 | 1.44E-209 |
| DUSP3    | 17:41858810  | -0.106  | 0.00709 | 7.67E-50  |
| DUSP6    | 12:89747875  | 0.0646  | 0.00795 | 5.23E-16  |
| DUT      | 15:48605208  | -0.0942 | 0.0056  | 5.03E-62  |
| DYM      | 18:46979529  | 0.0435  | 0.00552 | 4.30E-15  |
| DYNC1L11 | 3:32621214   | -0.157  | 0.00486 | 4.14E-209 |
| DYNC2L11 | 2:44001185   | 0.134   | 0.0112  | 1.37E-32  |
| DYNLL1   | 12:120950249 | 0.0896  | 0.0138  | 8.71E-11  |
| DYNLL2   | 17:56165525  | 0.0258  | 0.0039  | 4.40E-11  |
| DYNLT1   | 6:159047087  | 0.0473  | 0.00472 | 1.69E-23  |
| DYRK1A   | 21:38892198  | 0.0263  | 0.00293 | 4.03E-19  |
| DYX1C1   | 15:55772799  | -0.0889 | 0.0069  | 2.11E-37  |
| DZANK1   | 20:18434153  | -0.0151 | 0.00237 | 1.88E-10  |
| DZIP3    | 3:108264948  | 0.193   | 0.00465 | <1.0E-314 |
| E2F4     | 16:67178973  | -0.0384 | 0.00635 | 1.58E-09  |
| EAF1     | 3:15476011   | 0.03    | 0.00368 | 4.20E-16  |
| EAF2     | 3:121558894  | -0.109  | 0.00669 | 8.52E-58  |
| EBLN2    | 3:73111973   | 0.0965  | 0.0043  | 1.10E-106 |
| EBPL     | 13:50266544  | 0.0984  | 0.0049  | 2.21E-86  |
| ECD      | 10:74910452  | 0.144   | 0.0072  | 1.49E-85  |
| ECE1     | 1:21663030   | -0.0957 | 0.00553 | 2.38E-65  |
| ECH1     | 19:39324154  | -0.039  | 0.00314 | 5.92E-35  |
| ECHDC1   | 6:127696869  | -0.105  | 0.00493 | 3.38E-97  |
| ECHDC2   | 1:53340320   | 0.0429  | 0.00373 | 2.76E-30  |
| ECHDC3   | 10:11780324  | 0.0406  | 0.00451 | 2.91E-19  |
| ECI2     | 6:4126097    | -0.0249 | 0.00391 | 2.16E-10  |
| ECM2     | 9:95207806   | -0.0861 | 0.00307 | 2.01E-161 |
| ECSIT    | 19:11612283  | 0.0489  | 0.007   | 3.22E-12  |
| EDAR     | 2:109514464  | -0.029  | 0.00387 | 8.70E-14  |
| EDEM2    | 20:33730387  | 0.0364  | 0.00364 | 2.85E-23  |
| EDEM3    | 1:184710178  | 0.0637  | 0.00319 | 2.47E-85  |
| EDIL3    | 5:83408439   | -0.069  | 0.00366 | 1.09E-76  |
| EEA1     | 12:93280699  | -0.0471 | 0.00484 | 3.33E-22  |

|           |              |         |         |           |
|-----------|--------------|---------|---------|-----------|
| EED       | 11:85964887  | -0.0596 | 0.00289 | 4.11E-91  |
| EEF1DP3   | 13:32444439  | -0.0673 | 0.0041  | 5.99E-59  |
| EEF2      | 19:3990291   | -0.0292 | 0.00486 | 2.09E-09  |
| EEPDP1    | 7:36192787   | 0.0326  | 0.00376 | 5.86E-18  |
| EFCAB13   | 17:45401335  | 0.431   | 0.0115  | 2.48E-272 |
| EFCAB2    | 1:245199100  | 0.351   | 0.00932 | 1.67E-275 |
| EFCAB5    | 17:28223982  | 0.0345  | 0.00317 | 2.60E-27  |
| EFCAB6    | 22:44212838  | 0.0171  | 0.00244 | 3.03E-12  |
| EFCAB7    | 1:64065817   | -0.0398 | 0.00387 | 1.31E-24  |
| EFEMP2    | 11:65595803  | -0.0243 | 0.00385 | 2.95E-10  |
| EFHA1     | 13:22155152  | -0.0564 | 0.00548 | 1.33E-24  |
| EFHA2     | 8:16924115   | -0.0692 | 0.00548 | 4.65E-36  |
| EFHB      | 3:19987539   | -0.0884 | 0.00338 | 1.11E-141 |
| EFHC1     | 6:52268008   | 0.0432  | 0.00516 | 7.18E-17  |
| EFHD2     | 1:15738365   | 0.164   | 0.0172  | 2.56E-21  |
| EFTUD1    | 15:82427605  | -0.0352 | 0.0046  | 2.30E-14  |
| EFTUD2    | 17:42986982  | 0.0297  | 0.00377 | 4.21E-15  |
| EGF       | 4:110891673  | 0.0335  | 0.0054  | 5.59E-10  |
| EGLN2     | 19:41305793  | -0.0518 | 0.00354 | 1.57E-47  |
| EHD3      | 2:31480967   | -0.041  | 0.00532 | 1.50E-14  |
| EHHADH    | 3:184886137  | 0.0429  | 0.00518 | 1.54E-16  |
| EHMT1     | 9:140604118  | -0.0366 | 0.00253 | 1.47E-46  |
| EI24      | 11:125438802 | -0.0383 | 0.00628 | 1.19E-09  |
| EIF2A     | 3:150259942  | 0.0515  | 0.0046  | 8.56E-29  |
| EIF2AK1   | 7:6060908    | -0.0864 | 0.013   | 3.13E-11  |
| EIF2AK2   | 2:37363968   | 0.141   | 0.0218  | 8.64E-11  |
| EIF2AK4   | 15:40283250  | 0.0405  | 0.00481 | 4.61E-17  |
| EIF2B2    | 14:75446778  | 0.056   | 0.00402 | 2.84E-43  |
| EIF2C2    | 8:141604684  | -0.0577 | 0.00424 | 2.04E-41  |
| EIF3G     | 19:10227010  | 0.0642  | 0.00749 | 1.40E-17  |
| EIF3K     | 19:39106022  | -0.055  | 0.00928 | 3.36E-09  |
| EIF4A3    | 17:78112333  | -0.0346 | 0.00382 | 1.89E-19  |
| EIF4B     | 12:53401481  | 0.0628  | 0.00861 | 3.29E-13  |
| EIF4E2    | 2:233440924  | -0.0309 | 0.00482 | 1.58E-10  |
| EIF4E3    | 3:71769437   | 0.0993  | 0.0045  | 1.57E-103 |
| EIF4EBP2  | 10:72202312  | -0.0302 | 0.00499 | 1.58E-09  |
| EIF4ENIF1 | 22:31861950  | -0.0155 | 0.00253 | 9.69E-10  |
| EIF4G3    | 1:21351885   | 0.0609  | 0.00672 | 1.80E-19  |
| EIF5      | 14:103753469 | 0.0815  | 0.0118  | 5.46E-12  |

|        |             |         |         |           |
|--------|-------------|---------|---------|-----------|
| EIF6   | 20:33865852 | -0.0768 | 0.00562 | 6.79E-42  |
| ELAC2  | 17:12914024 | 0.0256  | 0.00353 | 4.68E-13  |
| ELAVL1 | 19:8028544  | 0.0378  | 0.00344 | 8.93E-28  |
| ELF2   | 4:140021554 | 0.0441  | 0.00477 | 3.43E-20  |
| ELK3   | 12:96599780 | -0.0243 | 0.00401 | 1.51E-09  |
| ELL    | 19:18567039 | 0.0255  | 0.00327 | 6.89E-15  |
| ELL2   | 5:95262044  | 0.0661  | 0.00538 | 2.89E-34  |
| ELMO1  | 7:37455281  | -0.108  | 0.00427 | 1.26E-133 |
| ELMOD2 | 4:141430495 | 0.0375  | 0.00608 | 7.14E-10  |
| ELOF1  | 19:11659930 | -0.0898 | 0.0143  | 3.63E-10  |
| ELOVL2 | 6:10945334  | -0.0319 | 0.00328 | 3.93E-22  |
| ELOVL4 | 6:80704185  | -0.0494 | 0.00593 | 1.06E-16  |
| ELOVL5 | 6:53153954  | 0.0352  | 0.00345 | 3.54E-24  |
| ELP2   | 18:33759196 | -0.072  | 0.00365 | 1.02E-83  |
| ELP3   | 8:27950008  | -0.083  | 0.00363 | 1.29E-110 |
| ELP6   | 3:47531935  | 0.0227  | 0.0034  | 2.83E-11  |
| EMB    | 5:49734505  | -0.0848 | 0.00871 | 3.37E-22  |
| EMC1   | 1:19558584  | -0.0236 | 0.00335 | 1.95E-12  |
| EMC2   | 8:109536300 | 0.0713  | 0.0055  | 5.94E-38  |
| EML3   | 11:62378221 | -0.0482 | 0.00401 | 7.52E-33  |
| EML4   | 2:42526974  | 0.0342  | 0.00439 | 7.68E-15  |
| EMR1   | 19:6900955  | -0.134  | 0.00958 | 6.00E-44  |
| EMR2   | 19:14887259 | -0.266  | 0.00867 | 4.20E-190 |
| EMR3   | 19:14776900 | -0.0773 | 0.0066  | 2.90E-31  |
| ENC1   | 5:73884146  | -0.473  | 0.00811 | <1.0E-314 |
| ENDOD1 | 11:94863186 | -0.0768 | 0.00457 | 8.22E-62  |
| ENDOG  | 9:131614082 | 0.0632  | 0.00494 | 6.25E-37  |
| ENDOU  | 12:48053875 | -0.0899 | 0.00618 | 4.71E-47  |
| ENG    | 9:130628665 | 0.0495  | 0.00502 | 1.06E-22  |
| ENGASE | 17:77035607 | -0.0315 | 0.00296 | 3.47E-26  |
| ENKUR  | 10:25317626 | -0.069  | 0.0104  | 3.62E-11  |
| ENO1   | 1:8913653   | 0.0384  | 0.0049  | 4.87E-15  |
| ENO3   | 17:4856580  | -0.0403 | 0.00417 | 7.19E-22  |
| ENOSF1 | 18:712319   | -0.139  | 0.00464 | 1.07E-182 |
| ENPP1  | 6:132223944 | -0.0277 | 0.00452 | 9.84E-10  |
| ENPP2  | 8:120648375 | -0.0732 | 0.00568 | 1.87E-37  |
| ENPP3  | 6:132018000 | -0.0629 | 0.00807 | 7.49E-15  |
| ENPP4  | 6:46116102  | 0.0866  | 0.00674 | 2.98E-37  |
| ENTPD1 | 10:97559214 | -0.294  | 0.0102  | 1.54E-169 |

|          |              |         |         |           |
|----------|--------------|---------|---------|-----------|
| ENTPD3   | 3:40483027   | -0.0456 | 0.00307 | 9.22E-49  |
| ENTPD4   | 8:23273758   | -0.0404 | 0.00298 | 2.82E-41  |
| ENTPD5   | 14:74480136  | 0.0606  | 0.0072  | 5.45E-17  |
| ENTPD6   | 20:25186137  | 0.0242  | 0.00248 | 2.18E-22  |
| EOGT     | 3:69055411   | -0.0283 | 0.00344 | 2.28E-16  |
| EOMES    | 3:27759338   | 0.0433  | 0.00618 | 2.80E-12  |
| EP400NL  | 12:132568660 | 0.127   | 0.00552 | 2.27E-111 |
| EPAS1    | 2:46623611   | -0.0186 | 0.00257 | 6.09E-13  |
| EPB41L2  | 6:131383686  | -0.0912 | 0.00556 | 5.04E-59  |
| EPB41L3  | 18:5452310   | 0.0697  | 0.00619 | 4.66E-29  |
| EPB41L4A | 5:111669756  | -0.101  | 0.00983 | 1.43E-24  |
| EPB41L5  | 2:120903167  | 0.0343  | 0.00484 | 1.59E-12  |
| EPC1     | 10:32650071  | -0.0223 | 0.00332 | 1.94E-11  |
| EPDR1    | 7:37958467   | 0.0267  | 0.00378 | 1.90E-12  |
| EPG5     | 18:43563022  | -0.0734 | 0.00511 | 5.93E-46  |
| EPHA1    | 7:143104331  | 0.0389  | 0.00318 | 5.29E-34  |
| EPHA4    | 2:222393635  | 0.108   | 0.0045  | 1.55E-120 |
| EPHB2    | 1:23054719   | 0.0318  | 0.00463 | 7.32E-12  |
| EPHB4    | 7:100378274  | -0.0533 | 0.00232 | 1.15E-111 |
| EPHX2    | 8:27389702   | -0.0512 | 0.00795 | 1.26E-10  |
| EPHX4    | 1:92496655   | -0.0676 | 0.0085  | 2.26E-15  |
| EPM2A    | 6:146003401  | -0.076  | 0.00373 | 8.84E-89  |
| EPS15    | 1:51811930   | -0.143  | 0.0124  | 2.74E-30  |
| EPS8     | 12:15843771  | -0.0254 | 0.00429 | 3.33E-09  |
| EPSTI1   | 13:43566373  | -0.26   | 0.014   | 1.43E-74  |
| EPT1     | 2:26583506   | 0.0391  | 0.00401 | 3.24E-22  |
| ERAP1    | 5:96121715   | -0.111  | 0.00327 | 3.87E-228 |
| ERAP2    | 5:96200770   | -0.464  | 0.00661 | <1.0E-314 |
| ERBB2IP  | 5:65314414   | 0.0286  | 0.00464 | 7.58E-10  |
| ERC1     | 12:1160615   | 0.0417  | 0.00508 | 2.67E-16  |
| ERCC3    | 2:127992907  | -0.0532 | 0.00447 | 2.78E-32  |
| ERCC5    | 13:103501256 | -0.0266 | 0.00369 | 7.22E-13  |
| ERCC6    | 10:50772362  | -0.0314 | 0.00298 | 9.81E-26  |
| ERCC6L2  | 9:98650046   | 0.0563  | 0.0044  | 6.18E-37  |
| EREG     | 4:75190202   | 0.0677  | 0.00661 | 2.26E-24  |
| ERGIC1   | 5:172365059  | 0.0303  | 0.00399 | 3.68E-14  |
| ERGIC2   | 12:29560218  | -0.0869 | 0.0097  | 4.45E-19  |
| ERI1     | 8:8882571    | 0.0655  | 0.00428 | 1.12E-51  |
| ERICH1   | 8:638867     | 0.177   | 0.00459 | 1.79E-286 |

|          |              |         |         |           |
|----------|--------------|---------|---------|-----------|
| ERLEC1   | 2:54002064   | -0.0261 | 0.00432 | 1.60E-09  |
| ERLIN1   | 10:101903906 | 0.0864  | 0.00628 | 2.44E-42  |
| ERMAP    | 1:43311563   | -0.0651 | 0.00456 | 2.52E-45  |
| ERN1     | 17:62145672  | 0.0866  | 0.00403 | 3.30E-98  |
| ERO1L    | 14:53160317  | 0.343   | 0.00762 | <1.0E-314 |
| ERO1LB   | 1:236394926  | 0.0911  | 0.0039  | 5.70E-115 |
| ERP27    | 12:15085950  | 0.0353  | 0.00591 | 2.62E-09  |
| ERV3-1   | 7:64446245   | 0.321   | 0.0226  | 6.93E-45  |
| ERVFRD-1 | 6:11095317   | 0.033   | 0.00458 | 6.74E-13  |
| ESD      | 13:47371659  | 0.0367  | 0.0043  | 1.86E-17  |
| ESF1     | 20:13704953  | 0.0371  | 0.00599 | 6.79E-10  |
| ESPN     | 1:6487031    | -0.138  | 0.00816 | 3.06E-62  |
| ESYT2    | 7:158521732  | -0.0853 | 0.00431 | 4.11E-84  |
| ETAA1    | 2:67587192   | 0.065   | 0.00684 | 2.96E-21  |
| ETFA     | 15:76603679  | -0.135  | 0.00691 | 1.43E-82  |
| ETFB     | 19:51850290  | -0.0381 | 0.00319 | 1.66E-32  |
| ETFDH    | 4:159601676  | 0.0732  | 0.0054  | 3.86E-41  |
| ETS1     | 11:128330520 | 0.0317  | 0.0044  | 6.57E-13  |
| ETS2     | 21:40206859  | 0.034   | 0.00386 | 1.73E-18  |
| ETV5     | 3:185822353  | -0.045  | 0.00551 | 4.33E-16  |
| ETV7     | 6:36385935   | -0.0674 | 0.00401 | 8.66E-62  |
| EVA1C    | 21:33787602  | -0.0362 | 0.00517 | 2.97E-12  |
| EVI2A    | 17:29671327  | -0.0923 | 0.00598 | 9.92E-53  |
| EVI2B    | 17:29590121  | -0.0913 | 0.0135  | 1.37E-11  |
| EVI5     | 1:93266838   | -0.0904 | 0.00713 | 2.26E-36  |
| EXO5     | 1:41005412   | -0.15   | 0.0105  | 8.67E-45  |
| EXOC1    | 4:56770708   | -0.0431 | 0.00526 | 2.89E-16  |
| EXOC2    | 6:671354     | -0.063  | 0.00335 | 1.77E-76  |
| EXOC3    | 5:457261     | 0.117   | 0.00382 | 2.02E-191 |
| EXOC4    | 7:132980371  | 0.0704  | 0.00695 | 7.02E-24  |
| EXOC7    | 17:74083905  | -0.0163 | 0.00271 | 1.69E-09  |
| EXOC8    | 1:231461261  | -0.0328 | 0.00382 | 1.17E-17  |
| EXOSC1   | 10:99205731  | 0.104   | 0.00685 | 1.15E-50  |
| EXOSC10  | 1:11128654   | -0.0337 | 0.00344 | 1.51E-22  |
| EXOSC3   | 9:37781891   | 0.122   | 0.00712 | 4.07E-64  |
| EXOSC6   | 16:70315911  | -0.0327 | 0.00307 | 2.90E-26  |
| EXOSC7   | 3:45051827   | -0.0626 | 0.00449 | 2.38E-43  |
| EXOSC8   | 13:37583831  | 0.134   | 0.00495 | 1.55E-150 |
| EXOSC9   | 4:122729251  | -0.0505 | 0.00423 | 1.94E-32  |

|          |              |         |         |           |
|----------|--------------|---------|---------|-----------|
| EXPH5    | 11:108464209 | 0.0519  | 0.00314 | 5.94E-60  |
| EXT1     | 8:118870151  | -0.0581 | 0.00513 | 2.01E-29  |
| EXT2     | 11:44087989  | -0.104  | 0.00439 | 2.85E-118 |
| EXTL2    | 1:101363666  | 0.0792  | 0.0116  | 1.12E-11  |
| EYA3     | 1:28416157   | -0.364  | 0.00949 | 5.95E-284 |
| EZH2     | 7:148525904  | 0.0536  | 0.00695 | 1.43E-14  |
| F11R     | 1:161000113  | -0.0407 | 0.00465 | 2.74E-18  |
| F13A1    | 6:6333084    | -0.0998 | 0.011   | 1.81E-19  |
| F2R      | 5:76037551   | 0.0744  | 0.00703 | 7.31E-26  |
| F2RL1    | 5:76114963   | -0.174  | 0.00522 | 1.46E-221 |
| F5       | 1:169540080  | 0.154   | 0.00688 | 1.46E-106 |
| FAAH     | 1:46898063   | -0.016  | 0.0027  | 3.68E-09  |
| FADD     | 11:70049523  | 0.0406  | 0.00313 | 5.15E-38  |
| FADS1    | 11:61556039  | -0.115  | 0.00538 | 2.65E-97  |
| FADS2    | 11:61546592  | -0.273  | 0.00604 | <1.0E-314 |
| FAH      | 15:80473662  | 0.0811  | 0.00641 | 3.15E-36  |
| FAHD1    | 16:1886022   | 0.236   | 0.0119  | 1.43E-84  |
| FAIM3    | 1:207080565  | -0.0685 | 0.00457 | 1.17E-49  |
| FAM102A  | 9:130699319  | -0.0743 | 0.00931 | 1.77E-15  |
| FAM104A  | 17:71188992  | 0.0543  | 0.00715 | 3.79E-14  |
| FAM105A  | 5:14572712   | -0.103  | 0.0163  | 3.20E-10  |
| FAM105B  | 5:14654464   | -0.0501 | 0.00565 | 1.04E-18  |
| FAM107B  | 10:14562793  | 0.0563  | 0.00366 | 2.54E-52  |
| FAM110A  | 20:826492    | 0.0453  | 0.00331 | 6.84E-42  |
| FAM114A1 | 4:38878081   | -0.045  | 0.00659 | 9.60E-12  |
| FAM114A2 | 5:153390416  | 0.052   | 0.00313 | 1.47E-60  |
| FAM117B  | 2:203491699  | 0.193   | 0.00487 | 2.29E-300 |
| FAM118A  | 22:45690275  | -2.14   | 0.0317  | <1.0E-314 |
| FAM118B  | 11:126060666 | -0.0894 | 0.00502 | 7.16E-69  |
| FAM120B  | 6:170635900  | 0.053   | 0.00371 | 1.58E-45  |
| FAM126A  | 7:23036691   | -0.167  | 0.0136  | 3.53E-34  |
| FAM126B  | 2:201858087  | -0.127  | 0.0203  | 4.61E-10  |
| FAM134A  | 2:220041928  | 0.0255  | 0.00426 | 2.38E-09  |
| FAM135A  | 6:71192813   | 0.0993  | 0.0058  | 6.84E-64  |
| FAM136A  | 2:70506809   | 0.0467  | 0.00728 | 1.51E-10  |
| FAM13A   | 4:89848583   | -0.105  | 0.00609 | 2.58E-64  |
| FAM151B  | 5:79782137   | 0.0903  | 0.00657 | 3.35E-42  |
| FAM153B  | 5:175556054  | -0.265  | 0.0438  | 1.60E-09  |
| FAM159A  | 1:53100880   | -0.0335 | 0.00506 | 3.59E-11  |

|          |              |         |         |           |
|----------|--------------|---------|---------|-----------|
| FAM160A2 | 11:6228594   | -0.0492 | 0.00306 | 9.93E-57  |
| FAM160B1 | 10:116604344 | 0.0423  | 0.00342 | 8.65E-35  |
| FAM168B  | 2:131810267  | -0.0322 | 0.00462 | 3.34E-12  |
| FAM173B  | 5:10270030   | -0.119  | 0.0153  | 1.25E-14  |
| FAM174A  | 5:99970339   | 0.243   | 0.013   | 8.21E-76  |
| FAM175A  | 4:84397133   | -0.0644 | 0.00381 | 2.22E-62  |
| FAM177A1 | 14:35499482  | 0.0721  | 0.00452 | 6.37E-56  |
| FAM177B  | 1:222940752  | 0.117   | 0.00764 | 4.24E-52  |
| FAM178A  | 10:102674531 | -0.0323 | 0.00411 | 4.82E-15  |
| FAM184A  | 6:119247734  | -0.0288 | 0.00302 | 1.96E-21  |
| FAM188A  | 10:15843462  | 0.0425  | 0.00606 | 2.38E-12  |
| FAM194A  | 3:150419164  | -0.0246 | 0.00339 | 5.04E-13  |
| FAM198B  | 4:159018833  | -0.34   | 0.0123  | 3.87E-156 |
| FAM19A1  | 3:68169693   | 0.192   | 0.00761 | 2.53E-133 |
| FAM19A2  | 12:62631026  | -0.14   | 0.00719 | 3.17E-81  |
| FAM208B  | 10:5850664   | 0.0366  | 0.00598 | 9.37E-10  |
| FAM210B  | 20:54935242  | -0.0723 | 0.00724 | 2.80E-23  |
| FAM212B  | 1:112238216  | -0.0917 | 0.00955 | 1.10E-21  |
| FAM213A  | 10:82203293  | 0.0921  | 0.00593 | 3.06E-53  |
| FAM216A  | 12:110897202 | 0.0749  | 0.00561 | 5.60E-40  |
| FAM220A  | 7:6371100    | -0.0472 | 0.00334 | 1.61E-44  |
| FAM227B  | 15:49592511  | -0.0287 | 0.00354 | 5.94E-16  |
| FAM228A  | 2:24371691   | -0.0242 | 0.0028  | 8.38E-18  |
| FAM3B    | 21:42659676  | -0.663  | 0.0141  | <1.0E-314 |
| FAM43A   | 3:194403491  | -0.0575 | 0.0036  | 3.81E-56  |
| FAM46C   | 1:118154575  | 0.0937  | 0.00866 | 5.25E-27  |
| FAM47E   | 4:77227485   | 0.0896  | 0.00692 | 8.07E-38  |
| FAM53A   | 4:1650891    | 0.0346  | 0.00584 | 3.18E-09  |
| FAM53C   | 5:137673167  | -0.0197 | 0.00319 | 6.82E-10  |
| FAM63B   | 15:59063196  | 0.104   | 0.00564 | 8.78E-74  |
| FAM65A   | 16:67607848  | 0.0394  | 0.00535 | 2.03E-13  |
| FAM65B   | 6:24819447   | 0.02    | 0.00326 | 9.42E-10  |
| FAM76B   | 11:95533557  | 0.081   | 0.00336 | 4.73E-122 |
| FAM81B   | 5:94810950   | -0.0408 | 0.00503 | 6.08E-16  |
| FAM82A1  | 2:38153486   | -0.0984 | 0.00487 | 1.17E-87  |
| FAM82B   | 8:87491951   | 0.0431  | 0.00435 | 7.23E-23  |
| FAM83A   | 8:124187620  | -0.0339 | 0.00533 | 2.28E-10  |
| FAM84B   | 8:127516678  | 0.0888  | 0.00649 | 7.46E-42  |
| FAM91A1  | 8:124785708  | 0.115   | 0.0145  | 2.44E-15  |

|         |              |         |         |           |
|---------|--------------|---------|---------|-----------|
| FAM92A1 | 8:94771530   | -0.0346 | 0.00527 | 5.47E-11  |
| FAM96A  | 15:64416621  | 0.0366  | 0.00563 | 8.82E-11  |
| FAM98C  | 19:38899548  | -0.0469 | 0.00574 | 4.08E-16  |
| FAN1    | 15:31157666  | -0.141  | 0.00373 | 6.27E-278 |
| FANCA   | 16:89825464  | 0.058   | 0.00238 | 1.25E-124 |
| FANCD2  | 3:10067651   | 0.0651  | 0.00424 | 3.92E-52  |
| FANCF   | 11:22665932  | -0.0427 | 0.00566 | 5.57E-14  |
| FANCI   | 15:89869329  | 0.0523  | 0.0065  | 1.05E-15  |
| FANCL   | 2:58468569   | -0.462  | 0.0228  | 7.91E-88  |
| FANK1   | 10:127680550 | -0.0718 | 0.00543 | 2.49E-39  |
| FAR2    | 12:29491528  | -0.06   | 0.00499 | 6.52E-33  |
| FARP1   | 13:99102279  | -0.0261 | 0.00208 | 1.60E-35  |
| FARP2   | 2:242395674  | 0.0552  | 0.0026  | 5.70E-96  |
| FARS2   | 6:5258730    | -0.221  | 0.0253  | 3.18E-18  |
| FARSA   | 19:13073068  | 0.0379  | 0.00621 | 1.08E-09  |
| FARSB   | 2:223528484  | -0.135  | 0.012   | 7.86E-29  |
| FAS     | 10:90751516  | -0.104  | 0.00486 | 1.81E-97  |
| FASTK   | 7:150750980  | 0.0231  | 0.00291 | 2.36E-15  |
| FASTKD1 | 2:170429975  | -0.0816 | 0.00572 | 2.38E-45  |
| FASTKD3 | 5:7860404    | -0.0708 | 0.0045  | 1.63E-54  |
| FAT2    | 5:150838293  | 0.0125  | 0.00198 | 2.79E-10  |
| FBLN5   | 14:92339850  | 0.0397  | 0.00264 | 4.66E-50  |
| FBN1    | 15:48934858  | 0.04    | 0.00222 | 1.68E-70  |
| FBN2    | 5:127752157  | -0.28   | 0.00697 | <1.0E-314 |
| FBXL13  | 7:102618968  | -0.75   | 0.0325  | 2.82E-112 |
| FBXL17  | 5:107574367  | 0.0263  | 0.00282 | 1.80E-20  |
| FBXL18  | 7:5511470    | -0.0454 | 0.00717 | 2.66E-10  |
| FBXL4   | 6:99433539   | 0.038   | 0.0036  | 9.95E-26  |
| FBXL5   | 4:15665083   | 0.0568  | 0.00473 | 8.11E-33  |
| FBXO10  | 9:37598317   | 0.118   | 0.0072  | 7.21E-59  |
| FBXO15  | 18:71815063  | 0.0488  | 0.0071  | 6.63E-12  |
| FBXO18  | 10:5945672   | -0.0253 | 0.00276 | 8.84E-20  |
| FBXO28  | 1:224315198  | -0.0316 | 0.00465 | 1.22E-11  |
| FBXO3   | 11:33792977  | -0.065  | 0.00381 | 1.22E-63  |
| FBXO30  | 6:146177815  | 0.0548  | 0.00735 | 9.98E-14  |
| FBXO32  | 8:124525377  | 0.0541  | 0.00881 | 8.54E-10  |
| FBXO33  | 14:39884876  | -0.0245 | 0.00348 | 2.16E-12  |
| FBXO34  | 14:55811327  | 0.0329  | 0.00354 | 2.37E-20  |
| FBXO42  | 1:16590230   | 0.0602  | 0.00371 | 1.16E-57  |



|         |              |         |         |           |
|---------|--------------|---------|---------|-----------|
| FBXO7   | 22:32900216  | 0.0675  | 0.00727 | 2.27E-20  |
| FBXW2   | 9:123517704  | -0.0333 | 0.00334 | 3.91E-23  |
| FBXW8   | 12:117330844 | -0.175  | 0.00472 | 2.10E-267 |
| FCAR    | 19:55388245  | -0.15   | 0.00965 | 1.52E-53  |
| FCER1G  | 1:161187665  | -0.204  | 0.00655 | 4.03E-196 |
| FCGBP   | 19:40406203  | 0.12    | 0.00611 | 3.75E-83  |
| FCGR1A  | 1:149788657  | -0.355  | 0.0322  | 5.07E-28  |
| FCGR2A  | 1:161479745  | 0.0472  | 0.00425 | 2.47E-28  |
| FCGR2B  | 1:161623934  | 0.234   | 0.018   | 4.27E-38  |
| FCGRT   | 19:50042867  | 0.105   | 0.0131  | 1.80E-15  |
| FCHO1   | 19:17856803  | 0.0406  | 0.00371 | 1.49E-27  |
| FCHO2   | 5:72399896   | 0.12    | 0.00741 | 2.10E-57  |
| FCN1    | 9:137808961  | -0.192  | 0.00522 | 6.37E-263 |
| FCN2    | 9:137809861  | -0.0188 | 0.00304 | 7.11E-10  |
| FCRL1   | 1:157787253  | -0.116  | 0.0092  | 4.76E-36  |
| FCRL3   | 1:157669278  | 0.165   | 0.00585 | 6.27E-164 |
| FCRL5   | 1:157528999  | -0.276  | 0.00703 | 3.04E-295 |
| FCRLB   | 1:161703992  | 0.0443  | 0.00706 | 3.95E-10  |
| FDFT1   | 8:11666451   | 0.128   | 0.00385 | 7.66E-220 |
| FDX1    | 11:110275001 | -0.0449 | 0.0051  | 1.93E-18  |
| FECH    | 18:55238820  | 0.265   | 0.0253  | 2.27E-25  |
| FEM1A   | 19:4775602   | 0.0408  | 0.00479 | 2.23E-17  |
| FEM1C   | 5:114896050  | 0.0663  | 0.00315 | 1.53E-94  |
| FERMT3  | 11:63963947  | 0.0312  | 0.00361 | 6.72E-18  |
| FEZ2    | 2:36781708   | -0.0738 | 0.00354 | 9.63E-93  |
| FGD2    | 6:36974607   | 0.0449  | 0.00616 | 3.45E-13  |
| FGD3    | 9:95787579   | -0.0936 | 0.00573 | 1.51E-58  |
| FGD4    | 12:32606149  | -0.0397 | 0.00642 | 6.63E-10  |
| FGD6    | 12:95473185  | 0.0995  | 0.00821 | 2.17E-33  |
| FGF2    | 4:123724239  | 0.0465  | 0.006   | 1.13E-14  |
| FGFBP2  | 4:15961555   | 0.166   | 0.00819 | 8.50E-88  |
| FGFR1   | 8:38340154   | 0.0431  | 0.00235 | 5.68E-73  |
| FGFR1OP | 6:167497487  | -0.245  | 0.0141  | 1.12E-65  |
| FGFR2   | 10:123197653 | 0.17    | 0.00389 | <1.0E-314 |
| FGGY    | 1:59813880   | -0.0691 | 0.00603 | 4.64E-30  |
| FGL2    | 7:76787832   | 0.0986  | 0.0147  | 2.04E-11  |
| FHIT    | 3:59996668   | 0.263   | 0.0244  | 7.18E-27  |
| FHL2    | 2:105997385  | -0.0323 | 0.00503 | 1.61E-10  |
| FHL3    | 1:38465315   | -0.322  | 0.0178  | 6.68E-71  |

|            |             |         |         |           |
|------------|-------------|---------|---------|-----------|
| FIG4       | 6:110051141 | 0.0436  | 0.0035  | 5.31E-35  |
| FIGNL1     | 7:50515627  | -0.0862 | 0.00472 | 3.27E-72  |
| FIS1       | 7:100892196 | 0.175   | 0.0291  | 2.05E-09  |
| FKBP1A     | 20:1323773  | -0.0417 | 0.00593 | 2.14E-12  |
| FKTN       | 9:108347398 | 0.0591  | 0.00415 | 3.67E-45  |
| FLCN       | 17:17172160 | 0.0476  | 0.00312 | 1.83E-51  |
| FLJ13197   | 4:38641936  | -0.202  | 0.00638 | 2.72E-202 |
| FLJ37201   | 10:91401407 | -0.0581 | 0.00695 | 8.36E-17  |
| FLJ40852   | 7:141459327 | -0.0514 | 0.00375 | 4.78E-42  |
| FLNB       | 3:58080960  | 0.0815  | 0.00963 | 3.27E-17  |
| FLOT1      | 6:30756882  | 0.0927  | 0.00454 | 3.09E-89  |
| FLOT2      | 17:27208589 | -0.0455 | 0.00473 | 1.04E-21  |
| FLT1       | 13:29039871 | 0.0477  | 0.00441 | 6.06E-27  |
| FLT3       | 13:28697891 | -0.467  | 0.053   | 1.63E-18  |
| FLVCR1     | 1:213035671 | -0.139  | 0.00515 | 5.09E-150 |
| FLVCR1-AS1 | 1:213010589 | -0.253  | 0.00579 | <1.0E-314 |
| FLVCR2     | 14:76085273 | -0.045  | 0.00385 | 3.49E-31  |
| FLYWCH1    | 16:2986323  | 0.123   | 0.00489 | 2.97E-132 |
| FLYWCH2    | 16:2955700  | 0.0452  | 0.00607 | 1.17E-13  |
| FMNL2      | 2:153416838 | -0.0298 | 0.0046  | 1.10E-10  |
| FMNL3      | 12:50063768 | 0.0352  | 0.00491 | 8.41E-13  |
| FMO5       | 1:146678399 | -0.0679 | 0.00969 | 2.81E-12  |
| FN1        | 2:216214791 | 0.0258  | 0.00239 | 5.13E-27  |
| FN3K       | 17:80696692 | 0.224   | 0.00709 | 3.14E-200 |
| FN3KRP     | 17:80667812 | 0.134   | 0.00922 | 7.29E-47  |
| FNBP1      | 9:132657208 | 0.0245  | 0.00375 | 7.62E-11  |
| FNBP1L     | 1:93911011  | -0.482  | 0.0141  | 6.59E-231 |
| FNDC3A     | 13:49593015 | -0.0969 | 0.0122  | 2.31E-15  |
| FNDC5      | 1:33319277  | 0.0308  | 0.00514 | 2.23E-09  |
| FNTB       | 14:65500149 | -0.0535 | 0.00629 | 2.36E-17  |
| FOCAD      | 9:20652462  | -0.0635 | 0.00931 | 1.04E-11  |
| FOLR3      | 11:71844701 | -1.92   | 0.0425  | <1.0E-314 |
| FOPNL      | 16:15975829 | 0.0371  | 0.00495 | 7.43E-14  |
| FOXJ2      | 12:8210637  | 0.0271  | 0.0032  | 3.51E-17  |
| FOXK2      | 17:80551319 | -0.14   | 0.019   | 1.66E-13  |
| FOXN2      | 2:48554955  | -0.103  | 0.00619 | 8.45E-61  |
| FOXN3      | 14:89805934 | -0.0256 | 0.0039  | 6.13E-11  |
| FOXN3-AS2  | 14:90043381 | -0.157  | 0.00991 | 5.73E-55  |
| FOXQ1      | 6:1286450   | -0.0274 | 0.00345 | 2.69E-15  |

|          |              |         |         |           |
|----------|--------------|---------|---------|-----------|
| FOXRED1  | 11:126148432 | 0.0363  | 0.00343 | 6.81E-26  |
| FOXRED2  | 22:36901622  | -0.0437 | 0.00587 | 1.22E-13  |
| FPGT     | 1:74667686   | 0.153   | 0.00416 | 4.25E-262 |
| FPR1     | 19:52276665  | 0.0809  | 0.00509 | 1.07E-55  |
| FPR2     | 19:52276665  | 0.237   | 0.00679 | 1.22E-240 |
| FPR3     | 19:52270939  | -0.118  | 0.0139  | 1.90E-17  |
| FRA10AC1 | 10:95422045  | 0.227   | 0.00562 | <1.0E-314 |
| FRAT1    | 10:99100432  | -0.0848 | 0.0055  | 1.61E-52  |
| FRAT2    | 10:99115683  | -0.0487 | 0.0037  | 6.01E-39  |
| FRMD3    | 9:86079180   | 0.0716  | 0.00772 | 2.35E-20  |
| FRMD4A   | 10:13747195  | 0.0234  | 0.0032  | 3.40E-13  |
| FRS2     | 12:69908429  | -0.0871 | 0.0105  | 1.84E-16  |
| FRY      | 13:32683295  | -0.107  | 0.0116  | 4.04E-20  |
| FSD1L    | 9:108210212  | 0.0718  | 0.00643 | 1.16E-28  |
| FST      | 5:52778262   | -0.389  | 0.0204  | 9.59E-79  |
| FTH1     | 11:61731727  | 0.245   | 0.0191  | 3.01E-37  |
| FTO      | 16:53873977  | 0.0429  | 0.00693 | 6.28E-10  |
| FTSJ3    | 17:61913214  | 0.0335  | 0.00383 | 2.82E-18  |
| FTSJD1   | 16:71292172  | -0.0394 | 0.00327 | 6.94E-33  |
| FUBP1    | 1:78453699   | -0.0492 | 0.00666 | 1.72E-13  |
| FUCA1    | 1:24201919   | 0.244   | 0.00989 | 4.05E-127 |
| FUCA2    | 6:143825104  | -0.0309 | 0.00493 | 4.03E-10  |
| FUT10    | 8:33276407   | -0.265  | 0.00657 | <1.0E-314 |
| FUT2     | 19:49201217  | 0.0405  | 0.00552 | 2.70E-13  |
| FUT7     | 9:139933589  | -0.228  | 0.0176  | 1.40E-37  |
| FUT8     | 14:65860092  | 0.0399  | 0.00445 | 4.03E-19  |
| FXN      | 9:71690963   | -0.0625 | 0.0048  | 4.11E-38  |
| FXYD5    | 19:35677210  | -0.119  | 0.00448 | 6.61E-147 |
| FXYD6    | 11:117708625 | 0.0664  | 0.00715 | 2.47E-20  |
| FYB      | 5:39116820   | -0.0571 | 0.00448 | 8.94E-37  |
| FYCO1    | 3:45963497   | -0.0256 | 0.00291 | 2.00E-18  |
| FYN      | 6:112099797  | -0.034  | 0.00417 | 4.36E-16  |
| FYTTD1   | 3:197498635  | -0.0876 | 0.00563 | 2.55E-53  |
| FZD3     | 8:28436650   | 0.0818  | 0.00687 | 2.56E-32  |
| FZD5     | 2:208629381  | 0.0858  | 0.00602 | 3.42E-45  |
| FZD6     | 8:104345778  | 0.12    | 0.00428 | 1.44E-160 |
| GOS2     | 1:209824899  | 0.098   | 0.0114  | 8.99E-18  |
| G3BP2    | 4:76564611   | 0.0254  | 0.0026  | 2.62E-22  |
| GAA      | 17:78064064  | -0.0521 | 0.00261 | 1.48E-85  |

|           |              |         |         |           |
|-----------|--------------|---------|---------|-----------|
| GAB2      | 11:77948095  | -0.0909 | 0.00602 | 1.58E-50  |
| GABARAPL1 | 12:10381873  | 0.11    | 0.0127  | 7.43E-18  |
| GABBR1    | 6:29626154   | 0.11    | 0.00901 | 1.13E-33  |
| GABPB1    | 15:50585337  | 0.0254  | 0.0037  | 7.08E-12  |
| GABPB2    | 1:151028929  | -0.0553 | 0.0058  | 2.50E-21  |
| GABRB1    | 4:47413121   | 0.022   | 0.00324 | 1.26E-11  |
| GABRG1    | 4:46099034   | -0.2    | 0.0221  | 1.73E-19  |
| GABRR2    | 6:90032082   | -0.051  | 0.00412 | 9.18E-35  |
| GAD1      | 2:171678269  | -0.103  | 0.00915 | 3.17E-29  |
| GAL       | 11:68402220  | -0.0662 | 0.00781 | 3.14E-17  |
| GALC      | 14:88459150  | 0.0707  | 0.00451 | 3.54E-54  |
| GALK2     | 15:49614081  | 0.0462  | 0.00361 | 6.54E-37  |
| GALNS     | 16:88913946  | -0.0257 | 0.00262 | 1.38E-22  |
| GALNT1    | 18:33188845  | 0.045   | 0.00405 | 2.09E-28  |
| GALNT10   | 5:153552873  | 0.0433  | 0.00468 | 3.21E-20  |
| GALNT14   | 2:31235581   | 0.0397  | 0.00311 | 1.11E-36  |
| GALNT4    | 12:89907166  | 0.0429  | 0.00559 | 1.90E-14  |
| GALNT5    | 2:158117683  | 0.227   | 0.0301  | 4.71E-14  |
| GALNT6    | 12:51785401  | -0.057  | 0.00289 | 2.43E-83  |
| GALNT7    | 4:174092791  | -0.0344 | 0.00339 | 5.07E-24  |
| GALNT8    | 12:4781448   | -0.0493 | 0.00793 | 5.56E-10  |
| GART      | 21:34898740  | 0.0218  | 0.00359 | 1.48E-09  |
| GAS2      | 11:22682639  | -0.0655 | 0.00616 | 3.85E-26  |
| GAS7      | 17:9815187   | -0.115  | 0.00557 | 1.99E-91  |
| GAS8      | 16:90149077  | -0.0685 | 0.0111  | 8.61E-10  |
| GATAD1    | 7:92097529   | 0.0558  | 0.00541 | 1.05E-24  |
| GATAD2A   | 19:19605763  | -0.0884 | 0.0026  | 1.75E-228 |
| GATC      | 12:120902279 | -0.0255 | 0.00429 | 2.85E-09  |
| GATM      | 15:45633270  | 0.126   | 0.00579 | 1.47E-100 |
| GATS      | 7:99809835   | -0.0538 | 0.00442 | 1.08E-33  |
| GBA       | 1:155214066  | -0.0466 | 0.00467 | 3.39E-23  |
| GBA2      | 9:35752252   | -0.0506 | 0.00288 | 5.67E-67  |
| GBAP1     | 1:155214473  | 0.172   | 0.00491 | 6.31E-242 |
| GBAS      | 7:56033558   | 0.0364  | 0.00503 | 5.27E-13  |
| GBE1      | 3:81769493   | 0.0527  | 0.00489 | 7.11E-27  |
| GBP3      | 1:89456659   | 0.225   | 0.00552 | <1.0E-314 |
| GBP4      | 1:89704458   | 0.0651  | 0.00978 | 3.10E-11  |
| GBP5      | 1:89742521   | 0.0882  | 0.0113  | 6.71E-15  |
| GCAT      | 22:38205060  | -0.104  | 0.00461 | 4.51E-108 |

|         |              |         |         |           |
|---------|--------------|---------|---------|-----------|
| GCC2    | 2:109038026  | 0.237   | 0.00435 | <1.0E-314 |
| GCFC2   | 2:75893853   | -0.0473 | 0.00391 | 3.43E-33  |
| GCH1    | 14:55359653  | 0.111   | 0.00763 | 4.44E-47  |
| GCLM    | 1:94372009   | 0.0521  | 0.00609 | 1.69E-17  |
| GCM1    | 6:53050717   | 0.0564  | 0.00537 | 1.53E-25  |
| GCNT2   | 6:10534503   | 0.196   | 0.00501 | 7.72E-294 |
| GCNT4   | 5:74349933   | 0.231   | 0.019   | 2.08E-33  |
| GCOM1   | 15:57855677  | -0.299  | 0.0057  | <1.0E-314 |
| GCSAM   | 3:111860222  | 0.0563  | 0.00598 | 7.35E-21  |
| GDAP1   | 8:75272727   | -0.0661 | 0.00584 | 2.36E-29  |
| GDE1    | 16:19505990  | 0.0985  | 0.00804 | 5.31E-34  |
| GDI2    | 10:5855403   | 0.103   | 0.00392 | 1.90E-143 |
| GDPD3   | 16:30155290  | 0.113   | 0.00935 | 5.48E-33  |
| GDPD5   | 11:75215421  | -0.025  | 0.00226 | 4.39E-28  |
| GEN1    | 2:17974041   | 0.0355  | 0.00571 | 5.49E-10  |
| GET4    | 7:867405     | 0.0179  | 0.00298 | 1.89E-09  |
| GFER    | 16:2037108   | 0.0683  | 0.00508 | 1.47E-40  |
| GFM2    | 5:74081943   | 0.0493  | 0.00403 | 6.86E-34  |
| GFPT1   | 2:69598243   | -0.0773 | 0.00326 | 3.37E-118 |
| GGACT   | 13:101241720 | -0.215  | 0.0244  | 1.50E-18  |
| GGCT    | 7:30577041   | -0.0281 | 0.00458 | 9.13E-10  |
| GGCX    | 2:85759588   | -0.039  | 0.00285 | 6.62E-42  |
| GGH     | 8:63884089   | -0.0388 | 0.00557 | 3.88E-12  |
| GGNBP2  | 17:34866915  | 0.0596  | 0.00282 | 3.23E-95  |
| GGPS1   | 1:235451482  | -0.186  | 0.00617 | 6.27E-185 |
| GGTA1P  | 9:124264116  | 0.374   | 0.01    | 2.92E-269 |
| GHITM   | 10:85898172  | -0.102  | 0.00732 | 3.06E-43  |
| GHRL    | 3:10320865   | -0.0582 | 0.00526 | 4.12E-28  |
| GHRLOS2 | 3:10314602   | -0.196  | 0.00584 | 9.94E-224 |
| GIF     | 11:59567968  | -0.127  | 0.0128  | 5.32E-23  |
| GIGYF2  | 2:233765133  | 0.0264  | 0.00449 | 4.56E-09  |
| GIMAP1  | 7:150408032  | 0.0749  | 0.00647 | 1.25E-30  |
| GIMAP2  | 7:150389677  | 0.0841  | 0.005   | 6.71E-62  |
| GIMAP4  | 7:150254030  | 0.149   | 0.0104  | 1.16E-45  |
| GIMAP5  | 7:150430711  | -0.205  | 0.00468 | <1.0E-314 |
| GIMAP6  | 7:150335490  | 0.0509  | 0.00399 | 1.25E-36  |
| GIMAP7  | 7:150215280  | 0.148   | 0.00901 | 5.21E-59  |
| GIMAP8  | 7:150153813  | -0.0448 | 0.00476 | 6.85E-21  |
| GIN1    | 5:102391465  | 0.0843  | 0.00496 | 4.84E-63  |

|          |              |         |         |           |
|----------|--------------|---------|---------|-----------|
| GINM1    | 6:149897455  | -0.102  | 0.00622 | 1.42E-58  |
| GINS1    | 20:25387465  | 0.038   | 0.00515 | 1.94E-13  |
| GIPC2    | 1:78478362   | -0.0399 | 0.00591 | 1.53E-11  |
| GIT1     | 17:27904711  | 0.0553  | 0.00297 | 5.43E-75  |
| GIT2     | 12:110473247 | -0.111  | 0.00777 | 3.15E-45  |
| GJA9     | 1:39325063   | 0.0228  | 0.00371 | 9.31E-10  |
| GK3P     | 4:166237058  | -0.143  | 0.0148  | 4.84E-22  |
| GK5      | 3:141932531  | 0.0398  | 0.00675 | 4.22E-09  |
| GKAP1    | 9:86394466   | 0.0581  | 0.00708 | 2.82E-16  |
| GLB1L    | 2:220113728  | 0.169   | 0.00743 | 2.13E-109 |
| GLCCI1   | 7:8067512    | 0.0831  | 0.00754 | 6.03E-28  |
| GLCE     | 15:69548338  | -0.195  | 0.0158  | 1.84E-34  |
| GLE1     | 9:131308732  | 0.0919  | 0.0135  | 1.31E-11  |
| GLI1     | 12:57870155  | -0.0302 | 0.00251 | 7.09E-33  |
| GLIPR1   | 12:75871264  | -0.116  | 0.00524 | 5.83E-104 |
| GLIPR1L1 | 12:75799521  | -0.0769 | 0.0051  | 2.67E-50  |
| GLIPR1L2 | 12:75784773  | 0.152   | 0.00505 | 4.84E-183 |
| GLO1     | 6:38652456   | -0.0633 | 0.0044  | 3.98E-46  |
| GLRX     | 5:95149966   | -0.148  | 0.00816 | 5.26E-71  |
| GLRX3    | 10:131934596 | 0.0899  | 0.00418 | 1.89E-98  |
| GLRX5    | 14:96009307  | 0.0424  | 0.00595 | 1.18E-12  |
| GLS      | 2:191836562  | 0.0316  | 0.00335 | 5.04E-21  |
| GLT1D1   | 12:129360928 | 0.0816  | 0.00796 | 2.07E-24  |
| GLT25D1  | 19:17654964  | 0.0374  | 0.0042  | 6.93E-19  |
| GLT25D2  | 1:183937280  | 0.127   | 0.00367 | 3.24E-236 |
| GLTP     | 12:110297809 | -0.0443 | 0.00543 | 4.23E-16  |
| GLTSCR1  | 19:48188809  | 0.0288  | 0.00239 | 4.59E-33  |
| GLTSCR2  | 19:48258717  | -0.0311 | 0.0041  | 4.22E-14  |
| GLUL     | 1:182377078  | 0.0479  | 0.00481 | 4.31E-23  |
| GLYATL2  | 11:58638918  | -1.11   | 0.0293  | 5.99E-280 |
| GLYR1    | 16:4883781   | -0.025  | 0.00281 | 7.08E-19  |
| GM2A     | 5:150597378  | -0.411  | 0.00898 | <1.0E-314 |
| GMDS     | 6:2232808    | -0.19   | 0.0148  | 3.78E-37  |
| GMEB1    | 1:29003360   | -0.0526 | 0.00694 | 4.04E-14  |
| GNA12    | 7:2755237    | -0.116  | 0.00537 | 6.17E-100 |
| GNA15    | 19:3155902   | -0.0822 | 0.00732 | 6.06E-29  |
| GNAI1    | 7:79766896   | -0.0615 | 0.00787 | 6.36E-15  |
| GNAI3    | 1:110114611  | 0.038   | 0.00398 | 2.06E-21  |
| GNAO1    | 16:56254646  | 0.113   | 0.0167  | 1.50E-11  |

|          |              |         |         |           |
|----------|--------------|---------|---------|-----------|
| GNAQ     | 9:80630123   | 0.0319  | 0.00507 | 3.41E-10  |
| GNAS     | 20:57478807  | -0.0402 | 0.00522 | 1.58E-14  |
| GNAZ     | 22:23455366  | 0.0306  | 0.00455 | 1.90E-11  |
| GNB4     | 3:179166083  | 0.0375  | 0.00433 | 6.82E-18  |
| GNB5     | 15:52452261  | -0.0931 | 0.00767 | 1.85E-33  |
| GNE      | 9:36253826   | -0.029  | 0.0044  | 5.19E-11  |
| GNG11    | 7:93551428   | 0.214   | 0.0124  | 5.78E-65  |
| GNG2     | 14:52421031  | 0.052   | 0.00511 | 4.24E-24  |
| GNG5     | 1:84953765   | -0.0717 | 0.0107  | 2.18E-11  |
| GNG8     | 19:47145973  | 0.103   | 0.011   | 1.34E-20  |
| GNL3     | 3:52687566   | -0.0248 | 0.00356 | 3.53E-12  |
| GNLY     | 2:85933003   | -0.399  | 0.0119  | 5.68E-224 |
| GNPAT    | 1:231408091  | 0.0387  | 0.00419 | 3.51E-20  |
| GNPDA2   | 4:44706919   | -0.0391 | 0.00484 | 8.73E-16  |
| GNRH1    | 8:25280800   | 0.0796  | 0.00557 | 2.31E-45  |
| GNRHR    | 4:68579924   | -0.282  | 0.00736 | 1.03E-283 |
| GNS      | 12:65153273  | 0.0544  | 0.00451 | 4.18E-33  |
| GOLGA1   | 9:127603814  | 0.0223  | 0.00334 | 2.84E-11  |
| GOLGA3   | 12:133407523 | -0.0699 | 0.00294 | 9.55E-119 |
| GOLGA5   | 14:93322590  | -0.114  | 0.00944 | 4.77E-33  |
| GOLGA6L9 | 15:82691423  | -0.258  | 0.0328  | 4.38E-15  |
| GOLGA7   | 8:41352161   | -0.0854 | 0.00392 | 1.13E-100 |
| GOLGA8B  | 15:34890377  | 0.721   | 0.041   | 2.61E-67  |
| GOLIM4   | 3:167838679  | -0.0488 | 0.00513 | 2.93E-21  |
| GOLM1    | 9:88692049   | 0.0834  | 0.00495 | 4.78E-62  |
| GOLPH3L  | 1:150709785  | -0.0537 | 0.00517 | 4.31E-25  |
| GOLT1B   | 12:21626944  | -0.0453 | 0.00488 | 2.26E-20  |
| GORAB    | 1:170507904  | 0.0992  | 0.00598 | 2.33E-60  |
| GOSR1    | 17:28825756  | -0.0448 | 0.00568 | 3.80E-15  |
| GP6      | 19:55501866  | -0.0725 | 0.00452 | 1.83E-56  |
| GPAM     | 10:113908060 | -0.0296 | 0.00338 | 2.62E-18  |
| GPANK1   | 6:31632808   | -0.122  | 0.0163  | 6.34E-14  |
| GPATCH1  | 19:33604175  | 0.0376  | 0.00417 | 3.07E-19  |
| GPATCH2L | 14:76606406  | -0.0458 | 0.00342 | 3.22E-40  |
| GPBP1L1  | 1:46178112   | 0.0383  | 0.00334 | 4.69E-30  |
| GPCPD1   | 20:5626343   | -0.07   | 0.00485 | 2.43E-46  |
| GPD1L    | 3:32204518   | 0.0808  | 0.00406 | 3.74E-85  |
| GPD2     | 2:157305763  | -0.136  | 0.00423 | 2.37E-207 |
| GPHN     | 14:67009600  | 0.0816  | 0.0135  | 1.64E-09  |

|         |              |         |         |           |
|---------|--------------|---------|---------|-----------|
| GPI     | 19:34919940  | -0.052  | 0.00759 | 8.47E-12  |
| GPLD1   | 6:24491341   | 0.0378  | 0.00284 | 1.33E-39  |
| GPM6A   | 4:176935634  | 0.105   | 0.00682 | 4.46E-52  |
| GPN2    | 1:27182984   | -0.0181 | 0.00301 | 2.06E-09  |
| GPN3    | 12:110857694 | 0.184   | 0.00549 | 2.33E-222 |
| GPNMB   | 7:23278283   | 0.0586  | 0.00336 | 3.91E-66  |
| GPR108  | 19:6737063   | -0.0375 | 0.00556 | 1.77E-11  |
| GPR114  | 16:57578966  | 0.0187  | 0.00302 | 6.69E-10  |
| GPR126  | 6:142753338  | 0.0239  | 0.00262 | 8.66E-20  |
| GPR128  | 3:100321173  | -1.05   | 0.0244  | <1.0E-314 |
| GPR133  | 12:131467623 | 0.141   | 0.0124  | 8.90E-30  |
| GPR135  | 14:59980614  | -0.0315 | 0.00272 | 1.09E-30  |
| GPR137B | 1:236312326  | -0.119  | 0.0074  | 4.75E-57  |
| GPR141  | 7:37732623   | -0.124  | 0.00877 | 1.59E-44  |
| GPR146  | 7:1063593    | -0.382  | 0.0152  | 7.42E-132 |
| GPR155  | 2:175354156  | 0.0938  | 0.00604 | 3.60E-53  |
| GPR160  | 3:169765795  | -0.195  | 0.00875 | 1.96E-105 |
| GPR162  | 12:6901077   | -0.0913 | 0.0043  | 8.19E-96  |
| GPR180  | 13:95253920  | 0.153   | 0.0044  | 1.30E-239 |
| GPR22   | 7:107127496  | -0.118  | 0.00861 | 2.76E-42  |
| GPR52   | 1:174423131  | -0.0967 | 0.00897 | 7.72E-27  |
| GPR63   | 6:97294970   | -0.1    | 0.00905 | 4.55E-28  |
| GPR65   | 14:88426154  | 0.0475  | 0.00523 | 1.50E-19  |
| GPR83   | 11:94136161  | -0.0312 | 0.00458 | 1.13E-11  |
| GPR97   | 16:57713536  | -0.103  | 0.00814 | 7.66E-36  |
| GPRC5C  | 17:72425499  | -0.113  | 0.00803 | 2.34E-44  |
| GPRC5D  | 12:13091286  | -0.0469 | 0.00765 | 9.48E-10  |
| GPX2    | 14:65404442  | 0.0958  | 0.00623 | 2.63E-52  |
| GPX3    | 5:150403098  | 0.0461  | 0.00516 | 5.53E-19  |
| GPX4    | 19:1103465   | -0.099  | 0.00459 | 9.32E-99  |
| GPX7    | 1:53073556   | -0.0396 | 0.00382 | 6.25E-25  |
| GRAMD1A | 19:35490861  | 0.0325  | 0.00233 | 1.98E-43  |
| GRAMD1B | 11:123355391 | -0.0356 | 0.00603 | 3.76E-09  |
| GRAMD1C | 3:113557690  | 0.257   | 0.0111  | 6.25E-112 |
| GRAMD4  | 22:47007378  | -0.0337 | 0.00435 | 1.01E-14  |
| GRAP    | 17:18924188  | 0.162   | 0.019   | 1.66E-17  |
| GRB10   | 7:50817513   | -0.0472 | 0.00703 | 2.15E-11  |
| GRB14   | 2:165401801  | 0.13    | 0.00734 | 7.63E-68  |
| GRB2    | 17:73271758  | 0.0361  | 0.00395 | 9.53E-20  |



|         |              |         |         |           |
|---------|--------------|---------|---------|-----------|
| GRHL1   | 2:10110019   | 0.027   | 0.00368 | 2.47E-13  |
| GRHPR   | 9:37422656   | -0.162  | 0.00456 | 4.93E-247 |
| GRIK1   | 21:30943987  | -0.0252 | 0.00414 | 1.27E-09  |
| GRIK4   | 11:120779520 | -0.0614 | 0.00343 | 1.04E-69  |
| GRIN3A  | 9:104339000  | -0.0249 | 0.00407 | 9.26E-10  |
| GRINA   | 8:145070403  | 0.163   | 0.00728 | 3.43E-106 |
| GRK4    | 4:2954717    | -0.104  | 0.00728 | 3.79E-45  |
| GRK5    | 10:121064720 | -0.0289 | 0.00374 | 1.35E-14  |
| GRK6    | 5:176857270  | -0.0285 | 0.00362 | 4.49E-15  |
| GRN     | 17:42398802  | -0.0813 | 0.00823 | 8.57E-23  |
| GSDMB   | 17:38020058  | 0.324   | 0.00655 | <1.0E-314 |
| GSK3B   | 3:119850315  | -0.0468 | 0.00398 | 1.38E-31  |
| GSKIP   | 14:96842676  | -0.174  | 0.0065  | 1.00E-148 |
| GSN     | 9:124034809  | -0.0497 | 0.00213 | 1.25E-114 |
| GSPT1   | 16:12021486  | 0.315   | 0.0445  | 1.84E-12  |
| GSR     | 8:30560887   | -0.0454 | 0.00607 | 8.93E-14  |
| GSTA1   | 6:52658191   | -0.135  | 0.00923 | 2.52E-47  |
| GSTA3   | 6:52712691   | -0.234  | 0.0209  | 1.02E-28  |
| GSTA4   | 6:52849146   | 0.0375  | 0.00475 | 3.34E-15  |
| GSTCD   | 4:106664211  | -0.0386 | 0.00407 | 3.67E-21  |
| GSTK1   | 7:142923787  | 0.113   | 0.00827 | 8.36E-42  |
| GSTM1   | 1:110230073  | 0.982   | 0.0359  | 2.90E-154 |
| GSTM2   | 1:110218486  | -0.603  | 0.0318  | 1.43E-77  |
| GSTM3   | 1:110247164  | 0.209   | 0.00516 | <1.0E-314 |
| GSTM4   | 1:110172362  | 0.463   | 0.00882 | <1.0E-314 |
| GSTM5   | 1:110254396  | 0.124   | 0.00694 | 6.67E-69  |
| GSTP1   | 11:67352689  | 0.213   | 0.00639 | 2.43E-220 |
| GSTT1   | 22:24366720  | 0.554   | 0.0129  | <1.0E-314 |
| GTF2A1  | 14:81701004  | 0.04    | 0.00379 | 9.22E-26  |
| GTF2A2  | 15:59923729  | 0.0834  | 0.00621 | 1.68E-40  |
| GTF2E2  | 8:30501232   | -0.0383 | 0.00405 | 4.57E-21  |
| GTF2F2  | 13:45694139  | -0.208  | 0.00834 | 9.41E-130 |
| GTF2H1  | 11:18357270  | -0.0314 | 0.00405 | 1.09E-14  |
| GTF2H4  | 6:30865386   | -0.126  | 0.0131  | 8.09E-22  |
| GTF2H5  | 6:158591478  | 0.31    | 0.0365  | 2.43E-17  |
| GTF3A   | 13:27997305  | 0.0248  | 0.00381 | 8.76E-11  |
| GTF3C3  | 2:197664437  | 0.122   | 0.017   | 7.59E-13  |
| GTPBP10 | 7:89976025   | 0.223   | 0.0164  | 1.34E-41  |
| GTPBP4  | 10:1075488   | -0.0267 | 0.00389 | 7.91E-12  |

|         |              |         |         |           |
|---------|--------------|---------|---------|-----------|
| GTPBP5  | 20:60766599  | -0.0207 | 0.0031  | 2.55E-11  |
| GTSF1   | 12:54818211  | -0.215  | 0.0218  | 6.64E-23  |
| GUCD1   | 22:24938455  | -0.0707 | 0.00902 | 5.60E-15  |
| GUCY1B2 | 13:51631607  | -0.0515 | 0.00328 | 3.21E-54  |
| GUCY2C  | 12:14721568  | -0.0868 | 0.00347 | 8.11E-131 |
| GUF1    | 4:44727151   | 0.0849  | 0.00363 | 4.02E-115 |
| GULP1   | 2:189365907  | -0.0392 | 0.00543 | 6.30E-13  |
| GUSB    | 7:65416536   | -0.069  | 0.0052  | 1.29E-39  |
| GUSBP5  | 4:144443295  | -0.119  | 0.00417 | 9.42E-167 |
| GXYLT1  | 12:42516376  | 0.0499  | 0.00594 | 6.03E-17  |
| GYP A   | 4:145046566  | -0.134  | 0.0185  | 3.97E-13  |
| GYPB    | 4:144978172  | -0.299  | 0.029   | 1.33E-24  |
| GYP C   | 2:127404215  | 0.083   | 0.00913 | 1.32E-19  |
| GYP E   | 4:144784844  | 0.417   | 0.0265  | 1.13E-54  |
| GZMB    | 14:25100933  | 0.0893  | 0.0105  | 2.89E-17  |
| GZMK    | 5:54317900   | 0.0981  | 0.0121  | 4.97E-16  |
| H1F0    | 22:38199222  | -0.266  | 0.00735 | 1.16E-256 |
| H1FNT   | 12:48715162  | -0.0243 | 0.00379 | 1.59E-10  |
| H2AFJ   | 12:14958051  | -0.0468 | 0.00421 | 2.00E-28  |
| H2AFV   | 7:44910667   | -0.077  | 0.00581 | 1.83E-39  |
| H2AFZ   | 4:100836788  | 0.0469  | 0.0077  | 1.24E-09  |
| H3F3B   | 17:73773000  | -0.0756 | 0.00699 | 5.54E-27  |
| HABP4   | 9:99212378   | 0.0599  | 0.00494 | 2.27E-33  |
| HACE1   | 6:105142061  | 0.037   | 0.0043  | 9.26E-18  |
| HADH    | 4:108955622  | 0.0404  | 0.00548 | 1.78E-13  |
| HADHA   | 2:26424583   | -0.078  | 0.00469 | 1.94E-60  |
| HAGH    | 16:1906352   | 0.155   | 0.0134  | 8.86E-31  |
| HAL     | 12:96388182  | -0.119  | 0.0058  | 2.91E-89  |
| HAT1    | 2:172813241  | 0.0604  | 0.005   | 3.70E-33  |
| HAUS3   | 4:2234875    | -0.0391 | 0.00651 | 1.90E-09  |
| HAUS4   | 14:23375251  | 0.319   | 0.00643 | <1.0E-314 |
| HAUS8   | 19:17211566  | -0.0432 | 0.00585 | 1.77E-13  |
| HAVCR1  | 5:156515406  | 0.0727  | 0.00835 | 4.04E-18  |
| HBE1    | 11:5239643   | -0.0598 | 0.00978 | 1.08E-09  |
| HBM     | 16:216420    | -0.567  | 0.0536  | 6.06E-26  |
| HBQ1    | 16:264642    | -0.049  | 0.00506 | 5.62E-22  |
| HBS1L   | 6:135323203  | 0.0626  | 0.00346 | 6.62E-71  |
| HBZ     | 16:209950    | -1.39   | 0.0414  | 2.04E-223 |
| HCAR2   | 12:123199826 | -0.0967 | 0.00737 | 9.59E-39  |

|         |              |         |         |           |
|---------|--------------|---------|---------|-----------|
| HCAR3   | 12:123200099 | 0.191   | 0.00737 | 4.83E-140 |
| HCG27   | 6:31175667   | 0.0797  | 0.00554 | 4.38E-46  |
| HCG4    | 6:29748308   | 0.0622  | 0.00487 | 8.14E-37  |
| HCG9    | 6:29934109   | 0.1     | 0.00735 | 7.73E-42  |
| HCK     | 20:30640593  | 0.0456  | 0.00561 | 5.20E-16  |
| HCLS1   | 3:121411876  | 0.0459  | 0.00351 | 1.75E-38  |
| HCP5    | 6:31431691   | -0.132  | 0.00896 | 1.90E-48  |
| HDAC4   | 2:240264555  | -0.0113 | 0.00186 | 1.27E-09  |
| HDDC2   | 6:125596957  | -0.127  | 0.00441 | 8.62E-171 |
| HDGF    | 1:156744737  | 0.107   | 0.0139  | 1.55E-14  |
| HDGFRP3 | 15:83852620  | -0.241  | 0.0102  | 4.77E-117 |
| HDHD2   | 18:44709035  | -0.145  | 0.0105  | 1.10E-42  |
| HDHD3   | 9:116141399  | 0.189   | 0.0259  | 3.20E-13  |
| HDLBP   | 2:242176429  | 0.0275  | 0.00426 | 1.24E-10  |
| HEATR1  | 1:236714747  | -0.0377 | 0.00357 | 6.68E-26  |
| HEATR3  | 16:50089132  | 0.107   | 0.00338 | 2.10E-202 |
| HEATR6  | 17:58167485  | -0.164  | 0.0049  | 2.46E-222 |
| HEBP1   | 12:13116794  | -0.301  | 0.00748 | <1.0E-314 |
| HEBP2   | 6:138725857  | 0.169   | 0.00825 | 4.26E-90  |
| HECTD2  | 10:93172388  | -0.0791 | 0.00646 | 5.21E-34  |
| HECTD3  | 1:45491504   | -0.0237 | 0.00358 | 3.94E-11  |
| HEG1    | 3:124821561  | -0.129  | 0.0209  | 7.76E-10  |
| HELB    | 12:66756215  | -0.0496 | 0.00394 | 8.29E-36  |
| HELLS   | 10:96382128  | 0.138   | 0.0045  | 1.72E-189 |
| HELQ    | 4:84394682   | -0.0261 | 0.00421 | 6.33E-10  |
| HEMGN   | 9:100720053  | -0.0845 | 0.00997 | 2.99E-17  |
| HEMK1   | 3:50630221   | 0.0583  | 0.00464 | 9.92E-36  |
| HERC1   | 15:64001876  | -0.0179 | 0.00302 | 3.47E-09  |
| HERC2   | 15:28419974  | -0.255  | 0.00632 | <1.0E-314 |
| HERC3   | 4:89648845   | 0.0413  | 0.00489 | 4.11E-17  |
| HERC4   | 10:69872209  | 0.0773  | 0.00999 | 1.21E-14  |
| HERPUD1 | 16:56944947  | 0.037   | 0.0059  | 3.89E-10  |
| HERPUD2 | 7:35756797   | 0.0202  | 0.00316 | 2.00E-10  |
| HEXB    | 5:73937854   | -0.0737 | 0.00621 | 5.41E-32  |
| HEXIM1  | 17:43226477  | 0.0302  | 0.00324 | 1.96E-20  |
| HEY1    | 8:80723932   | -0.1    | 0.00735 | 1.24E-41  |
| HGS     | 17:79642731  | 0.0325  | 0.00505 | 1.25E-10  |
| HGSNAT  | 8:43091271   | -0.0883 | 0.0148  | 2.35E-09  |
| HHAT    | 1:210502184  | -0.0366 | 0.00473 | 1.16E-14  |

|           |              |         |         |           |
|-----------|--------------|---------|---------|-----------|
| HHEX      | 10:94432000  | 0.0423  | 0.00406 | 3.88E-25  |
| HIAT1     | 1:100543962  | 0.0443  | 0.00637 | 3.79E-12  |
| HIATL1    | 9:97094721   | -0.956  | 0.0258  | 4.03E-267 |
| HIBADH    | 7:27619594   | -0.0515 | 0.00413 | 3.58E-35  |
| HIBCH     | 2:191193094  | 0.0659  | 0.00592 | 1.96E-28  |
| HIF1A     | 14:62139577  | 0.0739  | 0.0119  | 6.11E-10  |
| HIF1AN    | 10:102298855 | 0.0757  | 0.00563 | 1.49E-40  |
| HIGD1B    | 17:42927721  | 0.0507  | 0.00502 | 9.70E-24  |
| HIGD2A    | 5:175810837  | 0.199   | 0.0117  | 8.35E-63  |
| HILPDA    | 7:128054100  | -0.0306 | 0.00471 | 8.41E-11  |
| HINT1     | 5:130501557  | 0.323   | 0.0193  | 4.54E-61  |
| HIP1      | 7:75245141   | 0.377   | 0.00623 | <1.0E-314 |
| HIST1H1D  | 6:26229684   | -0.133  | 0.016   | 8.41E-17  |
| HIST1H2AB | 6:26033828   | -0.236  | 0.0177  | 1.01E-39  |
| HIST1H2AC | 6:26124634   | -0.083  | 0.00722 | 3.13E-30  |
| HIST1H2AE | 6:26221537   | 0.162   | 0.014   | 1.08E-30  |
| HIST1H2BD | 6:26171250   | 0.135   | 0.0071  | 2.93E-78  |
| HIST1H2BF | 6:26198845   | -0.216  | 0.00593 | 7.37E-259 |
| HIST1H2BG | 6:26234476   | -0.21   | 0.0173  | 2.61E-33  |
| HIST1H2BJ | 6:27080460   | 0.0368  | 0.00626 | 4.40E-09  |
| HIST1H2BK | 6:27137634   | -0.16   | 0.0177  | 2.52E-19  |
| HIST1H3B  | 6:26028819   | 0.176   | 0.0105  | 4.63E-61  |
| HIST1H3D  | 6:26190609   | 0.0924  | 0.00947 | 2.66E-22  |
| HIST1H3E  | 6:26175832   | -0.422  | 0.0102  | <1.0E-314 |
| HIST1H3I  | 6:27839746   | 0.216   | 0.0145  | 2.11E-49  |
| HIST1H4B  | 6:26030710   | 0.331   | 0.0119  | 2.52E-159 |
| HIST1H4C  | 6:26118570   | 0.223   | 0.00971 | 9.10E-111 |
| HIST1H4D  | 6:26204506   | 0.0876  | 0.0117  | 7.05E-14  |
| HIST1H4E  | 6:26229684   | 0.134   | 0.0167  | 1.09E-15  |
| HIST1H4F  | 6:26242777   | -0.0885 | 0.00775 | 8.05E-30  |
| HIST1H4H  | 6:26276650   | -0.179  | 0.00656 | 4.48E-153 |
| HIST1H4L  | 6:27840926   | 0.493   | 0.023   | 1.78E-97  |
| HIST2H2BF | 1:149772497  | 0.425   | 0.0424  | 2.02E-23  |
| HIST4H4   | 12:14966165  | -0.0426 | 0.00589 | 5.77E-13  |
| HIVEP1    | 6:12127054   | 0.0498  | 0.00732 | 1.18E-11  |
| HK1       | 10:71001110  | -0.0365 | 0.00557 | 6.09E-11  |
| HK2       | 2:75085163   | -0.0421 | 0.00405 | 5.03E-25  |
| HKDC1     | 10:70979924  | 0.0394  | 0.00273 | 1.81E-46  |
| HKR1      | 19:37839871  | 0.0429  | 0.00368 | 5.63E-31  |

|          |             |         |         |           |
|----------|-------------|---------|---------|-----------|
| HLA-B    | 6:31325235  | -0.263  | 0.00741 | 1.09E-246 |
| HLA-DMA  | 6:32961104  | 0.0424  | 0.0071  | 2.55E-09  |
| HLA-DMB  | 6:32904601  | 0.0647  | 0.0069  | 1.07E-20  |
| HLA-DOA  | 6:32974401  | -0.027  | 0.00367 | 2.07E-13  |
| HLA-DOB  | 6:32796856  | -0.601  | 0.017   | 8.89E-246 |
| HLA-DPA1 | 6:33025107  | 0.387   | 0.00794 | <1.0E-314 |
| HLA-DPB1 | 6:33047031  | 0.401   | 0.00723 | <1.0E-314 |
| HLA-DPB2 | 6:33096708  | 0.0932  | 0.00546 | 1.03E-63  |
| HLA-DQA2 | 6:32668100  | -0.254  | 0.00776 | 4.12E-213 |
| HLA-DQB2 | 6:32678206  | -0.112  | 0.00848 | 1.79E-39  |
| HLA-DRA  | 6:32411035  | 0.0571  | 0.00456 | 1.90E-35  |
| HLA-DRB1 | 6:32569859  | -5.43   | 0.0438  | <1.0E-314 |
| HLA-DRB5 | 6:32436217  | -2.58   | 0.0569  | <1.0E-314 |
| HLA-E    | 6:30457732  | 0.048   | 0.00402 | 1.65E-32  |
| HLA-F    | 6:29691090  | 0.127   | 0.00452 | 3.95E-161 |
| HLA-L    | 6:30228879  | 0.0835  | 0.00516 | 1.57E-57  |
| HLCS     | 21:38330036 | -0.062  | 0.00329 | 6.66E-77  |
| HLTF     | 3:148761815 | 0.0558  | 0.00384 | 4.94E-47  |
| HM13     | 20:30164874 | -0.086  | 0.00336 | 4.70E-136 |
| HMBOX1   | 8:28908874  | -0.0352 | 0.00389 | 1.92E-19  |
| HMCN1    | 1:185998333 | -0.0377 | 0.00586 | 1.28E-10  |
| HMG20A   | 15:77723027 | -0.0415 | 0.00399 | 3.46E-25  |
| HMGN3    | 6:79954685  | 0.0644  | 0.00993 | 9.31E-11  |
| HMGN4    | 6:26538543  | 0.0894  | 0.00625 | 1.81E-45  |
| HMHA1    | 19:1062598  | -0.0354 | 0.00407 | 4.20E-18  |
| HMHB1    | 5:143182261 | -0.147  | 0.0168  | 3.50E-18  |
| HMMR     | 5:162912162 | 0.0584  | 0.00587 | 4.56E-23  |
| HMOX1    | 22:35806238 | 0.0825  | 0.00696 | 5.45E-32  |
| HMOX2    | 16:4576423  | -0.0488 | 0.00406 | 6.77E-33  |
| HNMT     | 2:138792443 | -0.0588 | 0.00616 | 1.99E-21  |
| HNRNPA1  | 12:54685880 | -0.137  | 0.0142  | 8.55E-22  |
| HNRPLL   | 2:38868395  | 0.0816  | 0.0124  | 5.82E-11  |
| HOOK1    | 1:60261892  | 0.174   | 0.0152  | 4.69E-30  |
| HORMAD1  | 1:150721175 | -0.155  | 0.00627 | 3.82E-128 |
| HOXA1    | 7:27141657  | -0.0281 | 0.00443 | 2.34E-10  |
| HOXA2    | 7:27093099  | -0.251  | 0.00617 | <1.0E-314 |
| HOXA3    | 7:27102949  | -0.0256 | 0.00271 | 4.94E-21  |
| HOXA9    | 7:27200855  | 0.0536  | 0.00616 | 4.13E-18  |
| HOXB2    | 17:46581184 | 0.103   | 0.00371 | 1.84E-157 |

|           |              |         |         |           |
|-----------|--------------|---------|---------|-----------|
| HOXB3     | 17:46602432  | -0.0569 | 0.00326 | 2.02E-66  |
| HP        | 16:72118324  | 0.409   | 0.0129  | 7.75E-202 |
| HP1BP3    | 1:21146422   | -0.0441 | 0.00353 | 2.45E-35  |
| HPCAL1    | 2:10552641   | -0.0233 | 0.00271 | 1.12E-17  |
| HPCAL4    | 1:40150156   | -0.0955 | 0.00495 | 3.80E-80  |
| HPGD      | 4:175361437  | 0.0796  | 0.00509 | 4.90E-54  |
| HPGDS     | 4:95228540   | -0.416  | 0.0406  | 1.92E-24  |
| HPR       | 16:72106024  | -0.141  | 0.00858 | 2.77E-59  |
| HPS1      | 10:100218195 | 0.0431  | 0.00269 | 1.56E-56  |
| HPS3      | 3:148806754  | -0.0729 | 0.00764 | 2.25E-21  |
| HPS4      | 22:26924995  | 0.0264  | 0.00276 | 1.54E-21  |
| HPS5      | 11:18353640  | -0.0337 | 0.00351 | 1.18E-21  |
| HPSE      | 4:84237883   | 0.274   | 0.0204  | 2.63E-40  |
| HRAS      | 11:545276    | 0.0492  | 0.00533 | 3.81E-20  |
| HRSP12    | 8:99126359   | -0.137  | 0.00668 | 5.71E-90  |
| HS2ST1    | 1:87364781   | 0.0446  | 0.00602 | 1.54E-13  |
| HSBP1     | 16:83800282  | 0.0511  | 0.00507 | 1.07E-23  |
| HSD17B11  | 4:88286409   | -0.0599 | 0.00505 | 4.99E-32  |
| HSD17B12  | 11:43870871  | -0.0905 | 0.00635 | 3.04E-45  |
| HSD17B13  | 4:88176030   | -0.277  | 0.00623 | <1.0E-314 |
| HSD17B3   | 9:99052366   | -0.0329 | 0.00512 | 1.49E-10  |
| HSD17B4   | 5:118771423  | -0.141  | 0.0103  | 7.06E-42  |
| HSD17B7P2 | 10:38595712  | -0.698  | 0.0125  | <1.0E-314 |
| HSD17B8   | 6:33140009   | -0.0439 | 0.00536 | 3.26E-16  |
| HSDL1     | 16:84109997  | -0.0599 | 0.00496 | 3.71E-33  |
| HSDL2     | 9:115118961  | 0.0731  | 0.00598 | 6.66E-34  |
| HSF2      | 6:122721510  | 0.0501  | 0.00438 | 5.79E-30  |
| HSH2D     | 19:16268664  | 0.0659  | 0.00933 | 1.83E-12  |
| HSP90AA1  | 14:102550569 | 0.163   | 0.00742 | 5.35E-102 |
| HSPA1B    | 6:31785228   | -0.05   | 0.00559 | 5.07E-19  |
| HSPA1L    | 6:31809504   | 0.14    | 0.0144  | 4.73E-22  |
| HSPA4     | 5:132384131  | 0.0638  | 0.00491 | 5.32E-38  |
| HSPA6     | 1:161482520  | -0.0642 | 0.00923 | 3.99E-12  |
| HSPB11    | 1:54373313   | 0.0557  | 0.00882 | 2.97E-10  |
| HSPBAP1   | 3:122473431  | -0.144  | 0.00476 | 2.52E-186 |
| HSPH1     | 13:31700923  | 0.061   | 0.00565 | 6.47E-27  |
| HTATIP2   | 11:20384886  | -0.106  | 0.00428 | 1.02E-128 |
| HTRA4     | 8:38856336   | -0.0179 | 0.00294 | 1.27E-09  |
| HUS1      | 7:48015688   | 0.094   | 0.00316 | 1.69E-179 |

|         |              |         |         |           |
|---------|--------------|---------|---------|-----------|
| HYAL3   | 3:50329826   | -0.0166 | 0.00234 | 1.75E-12  |
| HYDIN   | 16:71311855  | -0.0956 | 0.00681 | 5.55E-44  |
| HYOU1   | 11:118921306 | -0.0267 | 0.00428 | 5.30E-10  |
| HYPK    | 15:44120559  | 0.0279  | 0.00394 | 1.51E-12  |
| IARS    | 9:94973571   | 0.0818  | 0.00889 | 5.06E-20  |
| ICA1    | 7:8301583    | 0.0286  | 0.00302 | 3.70E-21  |
| ICA1L   | 2:203625866  | 0.0558  | 0.00322 | 2.32E-65  |
| ICAM2   | 17:62106978  | 0.0284  | 0.00407 | 3.14E-12  |
| ICAM3   | 19:10458547  | -0.0824 | 0.00686 | 8.03E-33  |
| ICAM4   | 19:10422972  | -0.0782 | 0.013   | 2.08E-09  |
| ICMT    | 1:6274304    | 0.0649  | 0.00729 | 7.31E-19  |
| ICOSLG  | 21:45639368  | -0.0219 | 0.00352 | 5.88E-10  |
| IDE     | 10:94379609  | -0.0765 | 0.00868 | 1.53E-18  |
| IDH1    | 2:209108718  | 0.0799  | 0.0083  | 9.01E-22  |
| IDI1    | 10:1093992   | 0.0946  | 0.00706 | 2.69E-40  |
| IDI2    | 10:1078782   | 0.0493  | 0.00687 | 8.77E-13  |
| IDNK    | 9:86234596   | -0.0408 | 0.00489 | 9.19E-17  |
| IDO1    | 8:39773599   | -0.123  | 0.00807 | 1.64E-51  |
| IER3    | 6:30756882   | 0.0676  | 0.0042  | 9.54E-57  |
| IFFO1   | 12:6652572   | 0.0217  | 0.00311 | 3.51E-12  |
| IFI16   | 1:159045424  | -0.108  | 0.0137  | 5.24E-15  |
| IFI27   | 14:94583864  | -0.21   | 0.0156  | 2.11E-40  |
| IFI27L1 | 14:94564542  | 0.0516  | 0.0041  | 8.81E-36  |
| IFI27L2 | 14:94595989  | 0.0418  | 0.00546 | 2.26E-14  |
| IFI30   | 19:18282895  | 0.171   | 0.00595 | 9.07E-168 |
| IFI35   | 17:41166417  | 0.0714  | 0.0116  | 7.23E-10  |
| IFIT2   | 10:91066460  | -0.0573 | 0.00956 | 2.27E-09  |
| IFIT5   | 10:91186842  | 0.0942  | 0.0107  | 1.63E-18  |
| IFITM1  | 11:316931    | 0.326   | 0.0407  | 1.41E-15  |
| IFITM2  | 11:280000    | -0.124  | 0.0106  | 5.36E-31  |
| IFITM4P | 6:29696852   | -0.153  | 0.00531 | 1.29E-169 |
| IFNAR1  | 21:34670242  | -0.0556 | 0.00455 | 6.58E-34  |
| IFNAR2  | 21:34607358  | 0.065   | 0.00436 | 3.31E-49  |
| IFNGR2  | 21:34796556  | -0.0853 | 0.00567 | 3.71E-50  |
| IFNK    | 9:27570348   | -0.0931 | 0.00861 | 5.64E-27  |
| IFRD1   | 7:112109331  | -0.0965 | 0.00737 | 1.42E-38  |
| IFT27   | 22:37171611  | -0.0479 | 0.00436 | 8.50E-28  |
| IFT46   | 11:118437279 | 0.0642  | 0.00643 | 2.91E-23  |
| IFT52   | 20:42225923  | 0.0403  | 0.00638 | 2.87E-10  |

|         |              |         |         |           |
|---------|--------------|---------|---------|-----------|
| IFT57   | 3:107934470  | -0.0613 | 0.00854 | 8.31E-13  |
| IFT74   | 9:26956768   | -0.0861 | 0.00648 | 1.09E-39  |
| IFT80   | 3:160060748  | -0.0296 | 0.00355 | 9.36E-17  |
| IFT88   | 13:21248862  | -0.164  | 0.00477 | 3.76E-235 |
| IGF1R   | 15:99505423  | -0.0417 | 0.00536 | 9.39E-15  |
| IGF2BP3 | 7:23351080   | 0.0738  | 0.0113  | 7.33E-11  |
| IGFBP3  | 7:45975649   | -0.0405 | 0.00466 | 4.40E-18  |
| IGFBP7  | 4:57899602   | -0.0236 | 0.00335 | 1.99E-12  |
| IGFLR1  | 19:36230174  | 0.104   | 0.00377 | 9.82E-158 |
| IGSF11  | 3:118909523  | -0.0512 | 0.00658 | 8.36E-15  |
| IGSF6   | 16:21620547  | -0.0392 | 0.00538 | 3.75E-13  |
| IK      | 5:140030306  | -0.0298 | 0.0039  | 2.63E-14  |
| IKBIP   | 12:99022400  | -0.156  | 0.00787 | 7.39E-85  |
| IKBKAP  | 9:111631743  | 0.0802  | 0.011   | 3.51E-13  |
| IKBKE   | 1:206643774  | 0.0593  | 0.00427 | 3.46E-43  |
| IKZF1   | 7:50462418   | -0.0954 | 0.00401 | 4.58E-119 |
| IKZF3   | 17:37985801  | -0.0505 | 0.00582 | 5.58E-18  |
| IKZF5   | 10:124763922 | -0.0325 | 0.00383 | 3.20E-17  |
| IL10RB  | 21:34606972  | -0.052  | 0.00481 | 6.91E-27  |
| IL11RA  | 9:34649442   | -0.0813 | 0.00598 | 2.56E-41  |
| IL12RB1 | 19:18194529  | 0.0432  | 0.00313 | 1.57E-42  |
| IL12RB2 | 1:67798445   | -0.107  | 0.00506 | 5.31E-96  |
| IL15    | 4:142672097  | -0.0297 | 0.00369 | 9.93E-16  |
| IL15RA  | 10:6017838   | 0.0239  | 0.00231 | 9.02E-25  |
| IL17RA  | 22:17586583  | 0.0292  | 0.00314 | 1.77E-20  |
| IL17RB  | 3:53892553   | -0.0223 | 0.00288 | 1.02E-14  |
| IL18    | 11:112033129 | -0.108  | 0.00659 | 7.04E-59  |
| IL18BP  | 11:71685714  | 0.0429  | 0.00619 | 4.43E-12  |
| IL18R1  | 2:102941338  | 0.112   | 0.00657 | 3.51E-63  |
| IL18RAP | 2:102985424  | 0.514   | 0.0112  | <1.0E-314 |
| IL1R2   | 2:102598754  | -0.0929 | 0.00694 | 2.91E-40  |
| IL1RAP  | 3:190284838  | -0.157  | 0.0127  | 1.06E-34  |
| IL1RL1  | 2:102941338  | 0.225   | 0.0104  | 1.29E-100 |
| IL23A   | 12:56728137  | 0.0932  | 0.00876 | 3.42E-26  |
| IL23R   | 1:67605134   | 0.0578  | 0.00524 | 5.98E-28  |
| IL31RA  | 5:55131582   | -0.239  | 0.013   | 5.23E-73  |
| IL32    | 16:3116186   | 0.199   | 0.0107  | 3.47E-74  |
| IL4R    | 16:27324880  | -0.0486 | 0.00607 | 1.35E-15  |
| IL5     | 5:131835395  | -0.0376 | 0.00524 | 7.66E-13  |



|          |              |         |         |           |
|----------|--------------|---------|---------|-----------|
| IL5RA    | 3:3144765    | 0.0752  | 0.0115  | 5.78E-11  |
| IL6R     | 1:154423764  | -0.0251 | 0.00315 | 1.68E-15  |
| IL6ST    | 5:55310583   | 0.165   | 0.0239  | 5.16E-12  |
| IL7      | 8:79647495   | 0.0483  | 0.00577 | 7.73E-17  |
| IL7R     | 5:35854265   | -0.245  | 0.00721 | 2.31E-228 |
| IL8      | 4:74572039   | 0.298   | 0.0179  | 1.32E-60  |
| ILF3-AS1 | 19:10803124  | -0.264  | 0.0211  | 1.88E-35  |
| ILK      | 11:6633608   | 0.044   | 0.00491 | 3.75E-19  |
| ILKAP    | 2:239075812  | 0.0369  | 0.0035  | 1.21E-25  |
| IMMP2L   | 7:111057345  | 0.047   | 0.00453 | 6.48E-25  |
| IMMT     | 2:86400092   | 0.0301  | 0.00333 | 2.11E-19  |
| IMP4     | 2:131089135  | -0.0589 | 0.00516 | 8.39E-30  |
| IMPA1    | 8:82528953   | 0.0376  | 0.00471 | 1.65E-15  |
| IMPA2    | 18:11962002  | 0.0972  | 0.00626 | 3.52E-53  |
| IMPACT   | 18:21988293  | -0.089  | 0.00869 | 2.00E-24  |
| IMPG2    | 3:101046933  | -0.0387 | 0.00306 | 5.12E-36  |
| INADL    | 1:62207254   | -0.109  | 0.0116  | 1.11E-20  |
| ING1     | 13:111380701 | 0.0306  | 0.00292 | 2.05E-25  |
| ING5     | 2:242630987  | -0.259  | 0.0132  | 1.21E-82  |
| INIP     | 9:115514725  | -0.0993 | 0.0138  | 7.54E-13  |
| INO80B   | 2:74710491   | -0.0915 | 0.00401 | 7.42E-110 |
| INO80C   | 18:33077912  | 0.19    | 0.0213  | 4.53E-19  |
| INO80E   | 16:30050494  | 0.0212  | 0.00337 | 3.70E-10  |
| INPP1    | 2:191225866  | 0.0355  | 0.00498 | 1.13E-12  |
| INPP4B   | 4:143625262  | 0.12    | 0.00586 | 4.15E-90  |
| INPP5A   | 10:134531955 | 0.0562  | 0.00724 | 1.02E-14  |
| INPP5B   | 1:38331912   | 0.199   | 0.00527 | 9.83E-278 |
| INPP5D   | 2:234077240  | 0.0259  | 0.00319 | 5.79E-16  |
| INPP5K   | 17:1446091   | 0.14    | 0.00892 | 1.80E-54  |
| INSIG1   | 7:155091753  | -0.0858 | 0.00398 | 6.79E-99  |
| INSIG2   | 2:118873636  | 0.0391  | 0.0054  | 5.46E-13  |
| INSL3    | 19:17942927  | 0.0659  | 0.00801 | 2.37E-16  |
| INTS10   | 8:19702001   | -0.0846 | 0.00469 | 1.04E-70  |
| INTS12   | 4:106675946  | 0.0678  | 0.00793 | 1.63E-17  |
| INTS4    | 11:77653405  | 0.0472  | 0.0034  | 4.28E-43  |
| INTS5    | 11:62438207  | -0.0556 | 0.00595 | 1.29E-20  |
| INVS     | 9:103061366  | 0.0289  | 0.00316 | 9.22E-20  |
| IP6K2    | 3:48731961   | -0.0518 | 0.00706 | 2.47E-13  |
| IPCEF1   | 6:154542491  | 0.038   | 0.00641 | 3.24E-09  |

|         |              |         |         |           |
|---------|--------------|---------|---------|-----------|
| IPMK    | 10:60015313  | 0.139   | 0.00547 | 1.10E-133 |
| IPO11   | 5:61891622   | 0.0268  | 0.00303 | 1.21E-18  |
| IPO8    | 12:30783184  | 0.0377  | 0.00283 | 5.29E-40  |
| IQCB1   | 3:121558911  | 0.0811  | 0.00443 | 1.13E-72  |
| IQCE    | 7:2568770    | 0.0305  | 0.0038  | 1.23E-15  |
| IQCG    | 3:197664916  | -0.0809 | 0.0107  | 4.50E-14  |
| IQGAP1  | 15:91037534  | 0.0617  | 0.00418 | 2.69E-48  |
| IQGAP2  | 5:75698761   | -0.158  | 0.00437 | 2.99E-256 |
| IRAK3   | 12:66533086  | -0.0855 | 0.00632 | 5.37E-41  |
| IRAK4   | 12:44166318  | 0.0493  | 0.00608 | 6.87E-16  |
| IREB2   | 15:78793921  | 0.0555  | 0.00283 | 7.82E-83  |
| IRF2BP2 | 1:234751563  | 0.0291  | 0.00306 | 2.61E-21  |
| IRF3    | 19:50115057  | -0.0475 | 0.00781 | 1.27E-09  |
| IRF6    | 1:209980027  | -0.0353 | 0.00354 | 3.12E-23  |
| IRS1    | 2:227647098  | -0.0333 | 0.00507 | 5.52E-11  |
| ISCA1   | 9:88876385   | -0.344  | 0.00933 | 4.44E-265 |
| ISCA2   | 14:74962233  | -0.0802 | 0.00931 | 8.79E-18  |
| ISCU    | 12:108949557 | -0.0534 | 0.00577 | 2.88E-20  |
| ISG20   | 15:89202717  | -0.161  | 0.00611 | 1.35E-143 |
| ISL2    | 15:76674624  | 0.018   | 0.0026  | 5.28E-12  |
| ISOC1   | 5:128389088  | -0.0664 | 0.0044  | 2.41E-50  |
| ITCH    | 20:32993845  | -0.019  | 0.0029  | 6.38E-11  |
| ITGA1   | 5:52056209   | -0.16   | 0.00989 | 1.05E-57  |
| ITGA2   | 5:52316172   | -0.0765 | 0.00313 | 6.85E-125 |
| ITGA4   | 2:182323766  | -0.102  | 0.00395 | 4.53E-137 |
| ITGA9   | 3:37444901   | 0.0265  | 0.00232 | 9.02E-30  |
| ITGAM   | 16:31248870  | -0.0355 | 0.00412 | 9.96E-18  |
| ITGAV   | 2:187492742  | -0.0336 | 0.00335 | 1.68E-23  |
| ITGAX   | 16:31331160  | 0.175   | 0.00428 | <1.0E-314 |
| ITGB1   | 10:33266876  | -0.0322 | 0.00525 | 8.86E-10  |
| ITGB2   | 21:46328099  | 0.15    | 0.00558 | 1.48E-149 |
| ITGB3   | 17:45324590  | 0.0814  | 0.0123  | 4.56E-11  |
| ITGB5   | 3:124600652  | 0.0233  | 0.0037  | 2.95E-10  |
| ITGB7   | 12:53587468  | -0.0944 | 0.00661 | 1.81E-45  |
| ITIH2   | 10:7838932   | 0.0505  | 0.00242 | 3.01E-93  |
| ITIH4   | 3:52870618   | -0.0568 | 0.00248 | 6.10E-111 |
| ITK     | 5:156670047  | -0.0557 | 0.0075  | 1.27E-13  |
| ITLN1   | 1:160827772  | 0.377   | 0.0154  | 1.26E-124 |
| ITM2B   | 13:48824231  | -0.0239 | 0.00352 | 1.36E-11  |

|               |              |         |         |           |
|---------------|--------------|---------|---------|-----------|
| ITM2C         | 2:231750269  | 0.0696  | 0.0064  | 2.94E-27  |
| ITPA          | 20:3192385   | 0.0766  | 0.00716 | 1.95E-26  |
| ITPK1         | 14:93583933  | 0.12    | 0.0173  | 4.70E-12  |
| ITPKB         | 1:226923938  | -0.0165 | 0.00279 | 3.61E-09  |
| ITPR1         | 3:4519303    | 0.0879  | 0.00838 | 1.62E-25  |
| ITPR2         | 12:26986098  | 0.15    | 0.0062  | 3.01E-123 |
| ITPR3         | 6:33601132   | 0.033   | 0.0026  | 2.45E-36  |
| ITSN1         | 21:35030075  | 0.129   | 0.00358 | 3.68E-255 |
| ITSN2         | 2:24459736   | 0.0182  | 0.0029  | 3.91E-10  |
| IVD           | 15:40654038  | 0.0526  | 0.00339 | 3.70E-53  |
| IVNS1ABP      | 1:185294981  | 0.0264  | 0.00379 | 3.65E-12  |
| IWS1          | 2:128299079  | -0.0451 | 0.00466 | 5.48E-22  |
| JAGN1         | 3:9936427    | 0.107   | 0.00495 | 1.29E-99  |
| JAK1          | 1:65344284   | 0.0426  | 0.00486 | 2.49E-18  |
| JAK2          | 9:4984530    | -0.0446 | 0.00562 | 2.77E-15  |
| JAKMIP1       | 4:6179711    | 0.062   | 0.0038  | 1.72E-58  |
| JAKMIP2       | 5:147162475  | -0.169  | 0.0055  | 2.30E-190 |
| JARID2        | 6:15231515   | 0.0856  | 0.00482 | 1.33E-68  |
| JAZF1         | 7:28224053   | 0.0611  | 0.00817 | 8.49E-14  |
| JKAMP         | 14:59973281  | 0.0548  | 0.00447 | 4.77E-34  |
| JMJD6         | 17:74712310  | 0.0899  | 0.00361 | 1.86E-129 |
| JMJD7-PLA2G4E | 15:42115747  | -0.0244 | 0.00229 | 2.56E-26  |
| JMY           | 5:78548010   | -0.12   | 0.00441 | 3.72E-153 |
| JOSD1         | 22:39054474  | 0.034   | 0.00523 | 8.23E-11  |
| JUP           | 17:39940775  | -0.453  | 0.00741 | <1.0E-314 |
| KALRN         | 3:124352236  | 0.0453  | 0.00313 | 1.41E-46  |
| KANK1         | 9:518755     | -0.0493 | 0.00405 | 1.08E-33  |
| KANK2         | 19:11303469  | 0.0551  | 0.00478 | 2.07E-30  |
| KANSL1        | 17:44323046  | -0.0865 | 0.00623 | 4.75E-43  |
| KANSL1L       | 2:211060050  | 0.0279  | 0.00315 | 1.22E-18  |
| KANSL2        | 12:49024333  | -0.114  | 0.00395 | 9.57E-171 |
| KAT2B         | 3:20105673   | -0.172  | 0.00752 | 5.15E-110 |
| KAT6A         | 8:41799893   | -0.042  | 0.00391 | 1.19E-26  |
| KATNA1        | 6:149992258  | 0.0524  | 0.00412 | 1.31E-36  |
| KATNAL1       | 13:30895193  | 0.0814  | 0.00646 | 5.87E-36  |
| KAZN          | 1:15278473   | 0.0178  | 0.00227 | 5.07E-15  |
| KBTBD11       | 8:1956660    | -0.0469 | 0.00585 | 1.27E-15  |
| KBTBD2        | 7:32911455   | -0.0745 | 0.00409 | 4.65E-72  |
| KBTBD3        | 11:105947285 | 0.0812  | 0.00563 | 2.42E-46  |

|           |              |         |         |           |
|-----------|--------------|---------|---------|-----------|
| KBTBD7    | 13:41760947  | -0.0921 | 0.00625 | 3.18E-48  |
| KBTBD8    | 3:67048762   | -0.0561 | 0.00864 | 9.31E-11  |
| KCNAB1    | 3:156248263  | 0.0425  | 0.00418 | 4.96E-24  |
| KCNAB2    | 1:6094800    | -0.0418 | 0.00365 | 4.42E-30  |
| KCNE1     | 21:35872145  | -0.0638 | 0.00423 | 3.45E-50  |
| KCNE3     | 11:74171965  | -0.124  | 0.00849 | 4.24E-47  |
| KCNJ1     | 11:128679211 | 0.0729  | 0.00437 | 5.80E-61  |
| KCNJ15    | 21:39613236  | 0.28    | 0.00728 | 8.05E-286 |
| KCNJ2     | 17:68159261  | 0.074   | 0.0112  | 4.12E-11  |
| KCNK17    | 6:39282036   | -0.0464 | 0.00376 | 1.68E-34  |
| KCNMA1    | 10:79312114  | -0.0465 | 0.0021  | 2.87E-104 |
| KCNMB1    | 5:169806001  | -0.0338 | 0.00458 | 1.77E-13  |
| KCNMB4    | 12:70719934  | -0.0463 | 0.00579 | 1.60E-15  |
| KCNN4     | 19:44282529  | -0.0562 | 0.00295 | 3.85E-78  |
| KCNQ5     | 6:73287285   | -0.0629 | 0.00501 | 1.08E-35  |
| KCTD10    | 12:109904436 | -0.118  | 0.0083  | 2.95E-45  |
| KCTD18    | 2:201397724  | 0.0404  | 0.00684 | 3.82E-09  |
| KCTD2     | 17:73067482  | 0.0412  | 0.00454 | 1.69E-19  |
| KCTD4     | 13:45784496  | -0.124  | 0.0148  | 5.38E-17  |
| KCTD7     | 7:66145659   | -0.04   | 0.00518 | 1.31E-14  |
| KCTD9     | 8:25272364   | -0.0449 | 0.00565 | 2.45E-15  |
| KDELC2    | 11:108387409 | 0.0986  | 0.00612 | 4.31E-57  |
| KDELR2    | 7:6502367    | 0.0985  | 0.00573 | 2.32E-64  |
| KDELR3    | 22:38895520  | 0.0566  | 0.00464 | 8.78E-34  |
| KDM3A     | 2:86645750   | -0.0626 | 0.00362 | 3.07E-65  |
| KDM4C     | 9:7051826    | 0.0325  | 0.00442 | 2.14E-13  |
| KDM5A     | 12:428693    | 0.0657  | 0.00325 | 2.23E-87  |
| KDM5B     | 1:202738322  | -0.0345 | 0.00389 | 9.16E-19  |
| KDSR      | 18:61034420  | -0.063  | 0.00484 | 4.15E-38  |
| KHNYN     | 14:24899364  | -0.0484 | 0.00321 | 1.49E-50  |
| KIAA0020  | 9:2839608    | -0.0646 | 0.00435 | 8.43E-49  |
| KIAA0040  | 1:175139295  | 0.148   | 0.00461 | 1.56E-206 |
| KIAA0226L | 13:46932953  | -0.154  | 0.00869 | 1.34E-68  |
| KIAA0247  | 14:70114367  | -0.0448 | 0.00686 | 7.44E-11  |
| KIAA0319  | 6:24638740   | 0.0799  | 0.0039  | 1.26E-89  |
| KIAA0355  | 19:34878790  | -0.102  | 0.0113  | 2.33E-19  |
| KIAA0368  | 9:114220603  | 0.0264  | 0.00371 | 1.35E-12  |
| KIAA0391  | 14:35542759  | -0.284  | 0.00558 | <1.0E-314 |
| KIAA0430  | 16:15687514  | 0.0567  | 0.00849 | 2.76E-11  |

|           |              |         |         |           |
|-----------|--------------|---------|---------|-----------|
| KIAA0513  | 16:85059628  | -0.111  | 0.00544 | 1.18E-89  |
| KIAA0586  | 14:58894577  | 0.0255  | 0.00366 | 4.15E-12  |
| KIAA0753  | 17:6529728   | 0.0808  | 0.00352 | 3.71E-111 |
| KIAA0825  | 5:93918392   | -0.113  | 0.00653 | 9.52E-65  |
| KIAA0922  | 4:154516739  | 0.0319  | 0.0029  | 8.22E-28  |
| KIAA0930  | 22:45630223  | 0.0431  | 0.00326 | 2.34E-39  |
| KIAA1109  | 4:123172373  | 0.154   | 0.00834 | 3.29E-74  |
| KIAA1191  | 5:175762026  | -0.0866 | 0.0077  | 5.20E-29  |
| KIAA1324  | 1:109704979  | -0.685  | 0.00865 | <1.0E-314 |
| KIAA1324L | 7:86663578   | -0.15   | 0.0125  | 7.15E-33  |
| KIAA1328  | 18:34557858  | -0.0627 | 0.00474 | 2.16E-39  |
| KIAA1383  | 1:232941153  | 0.0291  | 0.0033  | 1.71E-18  |
| KIAA1429  | 8:95571602   | 0.0237  | 0.00294 | 7.84E-16  |
| KIAA1430  | 4:186131648  | 0.092   | 0.00706 | 3.30E-38  |
| KIAA1432  | 9:5750243    | 0.0239  | 0.00338 | 1.88E-12  |
| KIAA1468  | 18:59898173  | 0.0393  | 0.00317 | 8.27E-35  |
| KIAA1524  | 3:108251509  | -0.157  | 0.00527 | 2.30E-179 |
| KIAA1551  | 12:32123820  | 0.0853  | 0.00802 | 3.35E-26  |
| KIAA1586  | 6:56896601   | 0.0568  | 0.00894 | 2.27E-10  |
| KIAA1598  | 10:118643670 | -0.345  | 0.0077  | <1.0E-314 |
| KIAA1683  | 19:18388158  | -0.0745 | 0.00253 | 3.75E-177 |
| KIAA1715  | 2:176871243  | 0.127   | 0.00525 | 1.33E-122 |
| KIAA1737  | 14:77586119  | 0.0514  | 0.00405 | 2.97E-36  |
| KIAA1804  | 1:233468562  | -0.0419 | 0.00453 | 2.82E-20  |
| KIAA1919  | 6:111582885  | 0.138   | 0.00532 | 1.30E-140 |
| KIAA1967  | 8:22492143   | -0.0202 | 0.00234 | 1.02E-17  |
| KIF11     | 10:94432000  | 0.036   | 0.00478 | 5.90E-14  |
| KIF13A    | 6:17965147   | -0.0566 | 0.00535 | 6.24E-26  |
| KIF14     | 1:200564868  | -0.0329 | 0.00509 | 1.16E-10  |
| KIF16B    | 20:16536155  | 0.266   | 0.0064  | <1.0E-314 |
| KIF1B     | 1:10271688   | -0.209  | 0.00657 | 5.93E-204 |
| KIF1C     | 17:4897042   | -0.0223 | 0.00305 | 2.95E-13  |
| KIF24     | 9:34302153   | -0.0815 | 0.00867 | 8.17E-21  |
| KIF27     | 9:86505242   | -0.409  | 0.036   | 1.46E-29  |
| KIF3A     | 5:132072913  | 0.075   | 0.00912 | 2.47E-16  |
| KIF5B     | 10:32332682  | -0.0612 | 0.00576 | 4.29E-26  |
| KIF5C     | 2:149797754  | -0.0578 | 0.0068  | 2.53E-17  |
| KIFAP3    | 1:169990587  | 0.0585  | 0.00627 | 1.68E-20  |
| KIN       | 10:7869814   | -0.0341 | 0.00535 | 2.01E-10  |

|         |              |         |         |           |
|---------|--------------|---------|---------|-----------|
| KIR3DL1 | 19:55376524  | 0.112   | 0.0115  | 2.58E-22  |
| KIR3DX1 | 19:55040648  | -0.0503 | 0.00541 | 2.07E-20  |
| KLC1    | 14:104095320 | -0.0699 | 0.00329 | 3.89E-96  |
| KLC3    | 19:45847110  | -0.0438 | 0.00584 | 7.44E-14  |
| KLF10   | 8:103662852  | -0.048  | 0.00466 | 1.28E-24  |
| KLF11   | 2:10219746   | 0.0778  | 0.00642 | 2.40E-33  |
| KLF12   | 13:74339104  | 0.0288  | 0.00426 | 1.61E-11  |
| KLF3    | 4:38692835   | -0.0221 | 0.0037  | 2.44E-09  |
| KLF6    | 10:3820787   | 0.0221  | 0.00376 | 4.41E-09  |
| KLF7    | 2:208019791  | 0.0441  | 0.00385 | 6.18E-30  |
| KLHDC1  | 14:50162763  | -0.0648 | 0.00923 | 2.54E-12  |
| KLHDC10 | 7:129764961  | 0.0878  | 0.00634 | 7.07E-43  |
| KLHDC4  | 16:87764267  | -0.0647 | 0.00311 | 2.03E-92  |
| KLHDC8B | 3:49256529   | 0.188   | 0.0221  | 2.57E-17  |
| KLHL11  | 17:40068613  | -0.113  | 0.00655 | 8.96E-65  |
| KLHL20  | 1:173674087  | 0.0259  | 0.00423 | 9.67E-10  |
| KLHL3   | 5:137070445  | -0.0293 | 0.0036  | 4.72E-16  |
| KLHL36  | 16:84696385  | -0.0285 | 0.00378 | 5.63E-14  |
| KLHL5   | 4:39023992   | 0.0648  | 0.00517 | 1.45E-35  |
| KLHL7   | 7:23113503   | -0.056  | 0.00734 | 2.77E-14  |
| KLHL8   | 4:88187880   | -0.0347 | 0.00569 | 1.20E-09  |
| KLKB1   | 4:187119285  | -0.228  | 0.00704 | 1.68E-209 |
| KLRB1   | 12:9735686   | 0.118   | 0.00876 | 1.15E-40  |
| KLRC1   | 12:10596720  | -0.398  | 0.0152  | 3.05E-142 |
| KLRC3   | 12:10584152  | -0.663  | 0.0198  | 4.85E-224 |
| KLRD1   | 12:10463014  | 0.315   | 0.0114  | 1.64E-155 |
| KLRG1   | 12:9181706   | 0.298   | 0.0109  | 7.39E-154 |
| KLRK1   | 12:10563592  | 0.0874  | 0.00779 | 6.87E-29  |
| KMO     | 1:241689251  | 0.191   | 0.0224  | 1.84E-17  |
| KNTC1   | 12:123025873 | -0.038  | 0.00437 | 4.79E-18  |
| KPNA4   | 3:160294185  | -0.0405 | 0.00303 | 3.84E-40  |
| KRAS    | 12:25338274  | -0.0317 | 0.00372 | 1.89E-17  |
| KREMEN1 | 22:29514956  | -0.157  | 0.00676 | 1.79E-113 |
| KRI1    | 19:10672493  | 0.0565  | 0.00356 | 1.70E-55  |
| KRR1    | 12:75910334  | -0.0543 | 0.00428 | 2.79E-36  |
| KRT1    | 12:53065916  | -0.137  | 0.00378 | 2.00E-255 |
| KRT10   | 17:39027692  | -0.0338 | 0.00542 | 4.84E-10  |
| KRT23   | 17:39087292  | 0.249   | 0.00805 | 3.44E-193 |
| KRT5    | 12:52916022  | 0.0261  | 0.00349 | 9.41E-14  |

|          |             |         |         |           |
|----------|-------------|---------|---------|-----------|
| KRT72    | 12:53027940 | 0.202   | 0.00699 | 3.06E-170 |
| KRT73    | 12:53026975 | 0.139   | 0.00562 | 2.31E-127 |
| KRT77    | 12:53086337 | -0.0799 | 0.00912 | 2.47E-18  |
| KRTCAP3  | 2:27711157  | 0.0556  | 0.00689 | 9.32E-16  |
| KY       | 3:134317008 | 0.0525  | 0.0037  | 9.59E-45  |
| KYNU     | 2:143649203 | -0.407  | 0.0146  | 1.29E-160 |
| L1TD1    | 1:62660090  | -0.214  | 0.0127  | 6.49E-62  |
| L3HYPDH  | 14:59944725 | 0.0651  | 0.00387 | 9.32E-62  |
| L3MBTL3  | 6:130374461 | -0.16   | 0.00408 | 1.48E-296 |
| L3MBTL4  | 18:6411957  | 0.0652  | 0.00433 | 3.47E-50  |
| LACC1    | 13:44442238 | -0.0405 | 0.00511 | 2.74E-15  |
| LACTB    | 15:63408320 | -0.0915 | 0.00466 | 8.68E-83  |
| LACTB2   | 8:71564667  | -0.0685 | 0.0043  | 8.74E-56  |
| LAIR1    | 19:54852514 | 0.0415  | 0.00391 | 4.61E-26  |
| LAIR2    | 19:55014172 | 0.776   | 0.0695  | 1.16E-28  |
| LAMC1    | 1:182988052 | 0.0923  | 0.00327 | 1.36E-163 |
| LAMP5    | 20:9492062  | -0.0364 | 0.00602 | 1.64E-09  |
| LAMTOR2  | 1:156025096 | 0.0451  | 0.00567 | 2.12E-15  |
| LAMTOR5  | 1:110966889 | 0.0598  | 0.00598 | 2.33E-23  |
| LANCL1   | 2:211247567 | 0.035   | 0.00408 | 1.31E-17  |
| LAP3     | 4:17577329  | -0.143  | 0.00655 | 8.58E-102 |
| LAPTM4A  | 2:20226596  | 0.0764  | 0.00532 | 6.12E-46  |
| LAPTM4B  | 8:98779797  | 0.107   | 0.00986 | 6.29E-27  |
| LAPTM5   | 1:31206637  | -0.116  | 0.00465 | 9.14E-131 |
| LARP1    | 5:154196592 | 0.0272  | 0.00425 | 1.79E-10  |
| LARP1B   | 4:129017293 | 0.0316  | 0.00404 | 6.10E-15  |
| LARP4    | 12:50806930 | -0.0913 | 0.0118  | 1.47E-14  |
| LARP4B   | 10:846977   | 0.042   | 0.00485 | 6.16E-18  |
| LARP7    | 4:113510368 | -0.0511 | 0.00845 | 1.56E-09  |
| LARS     | 5:145487296 | -0.0745 | 0.0036  | 1.50E-91  |
| LARS2    | 3:45407535  | 0.024   | 0.00323 | 1.23E-13  |
| LASP1    | 17:37054253 | 0.0583  | 0.00384 | 6.59E-51  |
| LAT      | 16:28957172 | 0.0938  | 0.0127  | 1.57E-13  |
| LATS2    | 13:21590089 | -0.0281 | 0.00475 | 3.71E-09  |
| LBH      | 2:30509158  | -0.163  | 0.00542 | 8.00E-183 |
| LBR      | 1:225608435 | 0.052   | 0.0071  | 2.95E-13  |
| LBX2-AS1 | 2:74740961  | -0.102  | 0.00598 | 2.30E-63  |
| LCA5L    | 21:40761545 | -0.13   | 0.00376 | 7.85E-237 |
| LCLAT1   | 2:30657532  | -0.23   | 0.00426 | <1.0E-314 |

|          |              |         |         |           |
|----------|--------------|---------|---------|-----------|
| LCMT1    | 16:25159145  | 0.0346  | 0.0043  | 9.64E-16  |
| LCMT2    | 15:43609509  | 0.0588  | 0.00588 | 2.24E-23  |
| LCN8     | 9:139684867  | -0.0315 | 0.00535 | 4.22E-09  |
| LCP1     | 13:46714885  | -0.0166 | 0.00279 | 3.35E-09  |
| LCP2     | 5:169730365  | -0.0412 | 0.00647 | 2.01E-10  |
| LDB1     | 10:103874822 | 0.139   | 0.0123  | 2.52E-29  |
| LDHA     | 11:18415057  | 0.0271  | 0.0031  | 2.86E-18  |
| LDHC     | 11:18400811  | -0.254  | 0.00597 | <1.0E-314 |
| LDLRAP1  | 1:25890835   | 0.0835  | 0.00432 | 1.75E-80  |
| LDOC1L   | 22:44852717  | 0.03    | 0.00281 | 1.97E-26  |
| LEKR1    | 3:156546675  | 0.0274  | 0.00382 | 9.25E-13  |
| LEMD3    | 12:65575683  | -0.021  | 0.00306 | 8.36E-12  |
| LEPR     | 1:65890236   | 0.132   | 0.00567 | 9.76E-114 |
| LEPROTL1 | 8:29967903   | 0.0612  | 0.00754 | 5.87E-16  |
| LETMD1   | 12:51441897  | 0.0357  | 0.0038  | 8.63E-21  |
| LGALS1   | 22:38062112  | 0.0616  | 0.00656 | 8.44E-21  |
| LGALS14  | 19:40227363  | -0.0435 | 0.0037  | 1.62E-31  |
| LGALS17A | 19:40176917  | 0.0476  | 0.00409 | 8.02E-31  |
| LGALS2   | 22:37960365  | 1.05    | 0.0184  | <1.0E-314 |
| LGALS3   | 14:55610940  | 0.0435  | 0.00623 | 3.20E-12  |
| LGALS4   | 19:39304402  | -0.057  | 0.00829 | 6.94E-12  |
| LGALS8   | 1:236699354  | 0.184   | 0.0082  | 3.30E-106 |
| LGALSL   | 2:64690627   | -0.132  | 0.0203  | 8.37E-11  |
| LGR4     | 11:27480827  | -0.0169 | 0.00287 | 3.96E-09  |
| LGSN     | 6:64078347   | -0.0876 | 0.00753 | 7.14E-31  |
| LHFPL2   | 5:77784738   | -0.0344 | 0.0043  | 1.35E-15  |
| LHPP     | 10:126160495 | 0.0337  | 0.00403 | 7.89E-17  |
| LIAS     | 4:39473195   | 0.0924  | 0.00831 | 2.16E-28  |
| LIG1     | 19:48689548  | -0.0191 | 0.00316 | 1.43E-09  |
| LIG3     | 17:33307586  | 0.0212  | 0.00296 | 8.86E-13  |
| LILRA1   | 19:55093320  | 0.274   | 0.0109  | 4.97E-132 |
| LILRA2   | 19:55093173  | 0.402   | 0.0148  | 3.53E-151 |
| LILRA5   | 19:54827040  | 0.28    | 0.0248  | 2.96E-29  |
| LILRB1   | 19:55118872  | 0.124   | 0.0106  | 1.94E-31  |
| LILRB2   | 19:54800679  | -0.352  | 0.0135  | 3.89E-141 |
| LILRB3   | 19:54768528  | 0.357   | 0.0144  | 1.71E-128 |
| LILRB4   | 19:55172539  | -0.0927 | 0.0152  | 1.18E-09  |
| LIM2     | 19:51883149  | -0.031  | 0.00478 | 9.31E-11  |
| LIMA1    | 12:50599219  | -0.0352 | 0.00389 | 1.87E-19  |



|              |              |         |         |           |
|--------------|--------------|---------|---------|-----------|
| LIMD1        | 3:45693416   | -0.0737 | 0.00379 | 2.75E-81  |
| LIMD2        | 17:61817048  | 0.0309  | 0.00364 | 2.75E-17  |
| LIMK1        | 7:73549169   | 0.0444  | 0.00298 | 3.93E-49  |
| LIN54        | 4:83919524   | 0.0343  | 0.00369 | 2.28E-20  |
| LIN7A        | 12:81333553  | 0.387   | 0.0189  | 3.21E-90  |
| LIN7C        | 11:27477864  | -0.0584 | 0.0049  | 2.19E-32  |
| LIN9         | 1:226449936  | -0.145  | 0.024   | 1.40E-09  |
| LINC00085    | 19:52178063  | 0.0432  | 0.00347 | 4.37E-35  |
| LINC00161    | 21:29923340  | 0.0474  | 0.00637 | 1.08E-13  |
| LINC00173    | 12:116975822 | 0.144   | 0.0165  | 3.39E-18  |
| LINC00189    | 21:30582732  | -0.396  | 0.0203  | 1.51E-81  |
| LINC00282    | 13:52462939  | -0.0854 | 0.0111  | 1.37E-14  |
| LINC00324    | 17:8160602   | -0.0296 | 0.00423 | 3.00E-12  |
| LINC00339    | 1:22353986   | -0.216  | 0.00536 | <1.0E-314 |
| LINC00467    | 1:211621441  | -0.131  | 0.0221  | 3.32E-09  |
| LINC00471    | 2:232378792  | 0.103   | 0.00687 | 2.49E-49  |
| LINC00476    | 9:98635849   | -0.0784 | 0.0056  | 9.46E-44  |
| LINC00612    | 12:9173237   | 0.165   | 0.00599 | 2.99E-155 |
| LINGO2       | 9:28987757   | -0.0969 | 0.00684 | 1.02E-44  |
| LINS         | 15:101110565 | -0.0806 | 0.00644 | 2.07E-35  |
| LIPA         | 10:91002804  | -0.296  | 0.00553 | <1.0E-314 |
| LIPC         | 15:58770523  | -0.125  | 0.00658 | 2.77E-78  |
| LIPH         | 3:185265185  | 0.0635  | 0.0105  | 1.37E-09  |
| LIPT1        | 2:99804278   | 0.0788  | 0.00431 | 1.85E-72  |
| LITAF        | 16:11722729  | -0.0648 | 0.00982 | 4.69E-11  |
| LMAN1        | 18:56987447  | -0.0947 | 0.00517 | 1.39E-72  |
| LMBR1        | 7:156562243  | 0.137   | 0.0056  | 1.88E-125 |
| LMBR1L       | 12:49484494  | 0.0347  | 0.00392 | 1.02E-18  |
| LMBRD1       | 6:70514496   | -0.0547 | 0.00479 | 7.04E-30  |
| LMLN         | 3:197762004  | -0.0357 | 0.00524 | 1.08E-11  |
| LMNB1        | 5:126160582  | -0.0849 | 0.00558 | 3.58E-51  |
| LMO7         | 13:76323507  | 0.0436  | 0.00617 | 1.90E-12  |
| LMOD1        | 1:201910609  | 0.043   | 0.00444 | 4.83E-22  |
| LMTK2        | 7:97757101   | 0.109   | 0.00627 | 3.62E-66  |
| LNPEP        | 5:96355448   | -0.0711 | 0.00286 | 6.45E-129 |
| LNX2         | 13:28172775  | 0.132   | 0.00507 | 2.26E-141 |
| LOC100128252 | 19:57048240  | 0.153   | 0.0117  | 2.30E-38  |
| LOC100130691 | 2:178297740  | 0.0642  | 0.00611 | 1.46E-25  |
| LOC100130950 | 17:5134814   | 0.161   | 0.00538 | 2.05E-182 |

|           |              |         |         |           |
|-----------|--------------|---------|---------|-----------|
| LOC152217 | 3:196665864  | -0.127  | 0.00687 | 6.69E-74  |
| LOC284757 | 20:58894287  | 0.113   | 0.00617 | 1.09E-72  |
| LOC285696 | 5:17213102   | 0.064   | 0.00839 | 2.70E-14  |
| LOC286367 | 9:107525011  | -0.0604 | 0.00906 | 2.88E-11  |
| LOC338799 | 12:122251228 | 0.0716  | 0.00629 | 9.67E-30  |
| LOC339803 | 2:61405795   | 0.0533  | 0.00562 | 3.66E-21  |
| LOC554206 | 16:25037540  | 0.0446  | 0.00567 | 4.10E-15  |
| LOC554223 | 6:29769921   | -0.0924 | 0.00757 | 7.75E-34  |
| LOC654433 | 2:113978650  | 0.224   | 0.00552 | <1.0E-314 |
| LOC728175 | 4:185275108  | -0.0966 | 0.00874 | 4.28E-28  |
| LOC728558 | 10:97504093  | -0.249  | 0.0133  | 5.30E-76  |
| LOC79015  | 20:43273635  | 0.136   | 0.0131  | 9.92E-25  |
| LOC93622  | 4:6677430    | -0.0983 | 0.0102  | 1.04E-21  |
| LOH12CR1  | 12:12624336  | -0.0729 | 0.00746 | 2.05E-22  |
| LONP1     | 19:5666336   | 0.013   | 0.00209 | 4.93E-10  |
| LONP2     | 16:48390512  | -0.091  | 0.00426 | 3.30E-97  |
| LONRF1    | 8:12623036   | 0.0642  | 0.00749 | 1.39E-17  |
| LOXHD1    | 18:44157489  | 0.179   | 0.00387 | <1.0E-314 |
| LPAR1     | 9:113848169  | 0.128   | 0.00781 | 3.12E-59  |
| LPAR2     | 19:19748572  | -0.0865 | 0.0067  | 1.50E-37  |
| LPAR3     | 1:85361653   | -0.194  | 0.00767 | 9.16E-134 |
| LPCAT1    | 5:1494439    | -0.0291 | 0.00393 | 1.39E-13  |
| LPCAT2    | 16:55562466  | 0.056   | 0.00514 | 2.42E-27  |
| LPCAT3    | 12:7145853   | 0.0578  | 0.00749 | 1.41E-14  |
| LPGAT1    | 1:212008208  | 0.033   | 0.00402 | 3.18E-16  |
| LPIN1     | 2:11936798   | 0.0692  | 0.00388 | 2.93E-69  |
| LPIN2     | 18:3059805   | -0.116  | 0.00528 | 5.18E-103 |
| LPL       | 8:19860197   | -0.16   | 0.00772 | 1.10E-91  |
| LPP       | 3:187870778  | -0.0436 | 0.00396 | 5.95E-28  |
| LPPR2     | 19:11431901  | -0.0405 | 0.00503 | 1.14E-15  |
| LPXN      | 11:58286886  | 0.176   | 0.0128  | 6.16E-42  |
| LRBA      | 4:151706926  | 0.0438  | 0.00501 | 3.37E-18  |
| LRCH1     | 13:47238854  | -0.0331 | 0.00405 | 4.14E-16  |
| LRGUK     | 7:133770621  | 0.0834  | 0.00386 | 3.70E-99  |
| LRIG1     | 3:66436182   | -0.0175 | 0.00283 | 7.49E-10  |
| LRMP      | 12:25242333  | 0.0389  | 0.0042  | 2.74E-20  |
| LRP10     | 14:23321112  | -0.0446 | 0.0048  | 2.19E-20  |
| LRP12     | 8:105544860  | 0.0727  | 0.00577 | 5.85E-36  |
| LRP2BP    | 4:186236239  | -0.0466 | 0.0045  | 7.59E-25  |

|           |              |         |         |           |
|-----------|--------------|---------|---------|-----------|
| LRP6      | 12:12426161  | -0.139  | 0.00803 | 4.46E-65  |
| LRP8      | 1:53813684   | 0.017   | 0.00271 | 4.31E-10  |
| LRPAP1    | 4:3527185    | 0.0427  | 0.00375 | 9.44E-30  |
| LRPPRC    | 2:44141849   | 0.0227  | 0.00319 | 1.17E-12  |
| LRR1      | 14:50084394  | -0.0598 | 0.00434 | 1.51E-42  |
| LRRC1     | 6:53637762   | -0.0321 | 0.00349 | 5.84E-20  |
| LRRC14    | 8:145756170  | -0.0381 | 0.00512 | 1.14E-13  |
| LRRC16A   | 6:25398426   | -0.21   | 0.00539 | 1.23E-291 |
| LRRC17    | 7:102618968  | -0.325  | 0.0221  | 4.19E-48  |
| LRRC18    | 10:50119054  | 0.0406  | 0.00586 | 4.82E-12  |
| LRRC2     | 3:46518016   | 0.083   | 0.00862 | 8.69E-22  |
| LRRC23    | 12:7007806   | -0.0458 | 0.00388 | 1.21E-31  |
| LRRC25    | 19:18510925  | 0.0671  | 0.00372 | 1.69E-70  |
| LRRC27    | 10:134158940 | -0.107  | 0.00739 | 1.42E-46  |
| LRRC28    | 15:99788247  | -0.0653 | 0.00454 | 5.77E-46  |
| LRRC33    | 3:196415355  | 0.0393  | 0.00655 | 2.02E-09  |
| LRRC34    | 3:169551558  | 0.1     | 0.0145  | 4.65E-12  |
| LRRC37BP1 | 17:28952286  | -0.0679 | 0.00886 | 2.18E-14  |
| LRRC39    | 1:100603706  | -0.117  | 0.0116  | 1.08E-23  |
| LRRC4     | 7:127625250  | -0.0861 | 0.00694 | 6.97E-35  |
| LRRC47    | 1:3700119    | 0.0336  | 0.00314 | 2.22E-26  |
| LRRC48    | 17:17894674  | -0.0428 | 0.00577 | 1.36E-13  |
| LRRC57    | 15:42836558  | -0.115  | 0.00711 | 2.29E-57  |
| LRRC6     | 8:133694084  | -0.556  | 0.00952 | <1.0E-314 |
| LRRC61    | 7:150004244  | -0.0304 | 0.00394 | 1.24E-14  |
| LRRC7     | 1:70179004   | -0.102  | 0.00364 | 2.41E-160 |
| LRRC8B    | 1:89941533   | -0.257  | 0.00587 | <1.0E-314 |
| LRRC8D    | 1:90282382   | 0.0516  | 0.00384 | 1.40E-40  |
| LRRCC1    | 8:86098018   | 0.059   | 0.00567 | 4.59E-25  |
| LRRFIP1   | 2:238586472  | -0.0642 | 0.0042  | 1.11E-51  |
| LRRFIP2   | 3:37055712   | 0.0652  | 0.0032  | 1.07E-88  |
| LRRIQ3    | 1:74667686   | 0.129   | 0.00546 | 6.69E-118 |
| LRRK1     | 15:101468792 | 0.0247  | 0.00361 | 9.10E-12  |
| LRRN1     | 3:3865370    | -0.15   | 0.0101  | 1.16E-48  |
| LRRTM2    | 5:138155959  | 0.136   | 0.00664 | 2.41E-89  |
| LRWD1     | 7:102065322  | 0.0451  | 0.00471 | 1.66E-21  |
| LSG1      | 3:194377712  | -0.216  | 0.00579 | 2.01E-270 |
| LSM1      | 8:38043758   | -0.0537 | 0.00642 | 8.16E-17  |
| LSM6      | 4:147106801  | 0.0444  | 0.00582 | 2.60E-14  |

|         |              |         |         |           |
|---------|--------------|---------|---------|-----------|
| LSMD1   | 17:7742601   | -0.0926 | 0.0145  | 1.92E-10  |
| LSR     | 19:35714581  | 0.0195  | 0.00283 | 6.25E-12  |
| LSS     | 21:47652549  | 0.0537  | 0.00342 | 3.07E-54  |
| LST1    | 6:31552850   | 0.0704  | 0.00467 | 2.26E-50  |
| LTA4H   | 12:96419941  | 0.285   | 0.0105  | 3.27E-151 |
| LTBP3   | 11:65326154  | -0.025  | 0.00241 | 6.47E-25  |
| LTBR    | 12:6451590   | -0.0229 | 0.00244 | 8.05E-21  |
| LTF     | 3:46490250   | -0.0368 | 0.00614 | 2.35E-09  |
| LTN1    | 21:30310639  | -0.0282 | 0.0031  | 1.17E-19  |
| LUC7L   | 16:249987    | 0.0656  | 0.00384 | 1.06E-63  |
| LUZP1   | 1:23432346   | 0.0227  | 0.00312 | 4.10E-13  |
| LUZP6   | 7:135628370  | 0.0565  | 0.00749 | 5.52E-14  |
| LXN     | 3:158393178  | -0.0647 | 0.00511 | 3.22E-36  |
| LY6G5B  | 6:31643251   | 0.0728  | 0.0063  | 1.40E-30  |
| LY6G5C  | 6:31630241   | 0.0768  | 0.00355 | 9.55E-100 |
| LY75    | 2:160689916  | -0.166  | 0.00403 | <1.0E-314 |
| LY86    | 6:6579484    | -0.129  | 0.00643 | 1.00E-85  |
| LY96    | 8:74906729   | -0.158  | 0.0102  | 6.22E-53  |
| LYAR    | 4:4271886    | -0.0798 | 0.00669 | 2.31E-32  |
| LYG1    | 2:99866877   | -0.0557 | 0.00456 | 6.52E-34  |
| LYG2    | 2:99863928   | -0.0757 | 0.00733 | 1.03E-24  |
| LYN     | 8:56785685   | 0.0327  | 0.0046  | 1.37E-12  |
| LYNX1   | 8:143879290  | -0.0215 | 0.00245 | 2.74E-18  |
| LYPD2   | 8:143838669  | -0.0352 | 0.00506 | 3.96E-12  |
| LYPLA1  | 8:54950307   | 0.338   | 0.0527  | 1.51E-10  |
| LYPLAL1 | 1:219394080  | -0.101  | 0.00573 | 6.18E-67  |
| LYRM4   | 6:5260694    | -0.247  | 0.016   | 9.81E-53  |
| LYRM5   | 12:25361756  | -0.155  | 0.0201  | 1.43E-14  |
| LYRM7   | 5:130550343  | -0.143  | 0.0111  | 2.65E-37  |
| LYSMD3  | 5:89814604   | 0.268   | 0.00562 | <1.0E-314 |
| LYSMD4  | 15:100273607 | -0.0352 | 0.00327 | 9.77E-27  |
| LYVE1   | 11:10563090  | 0.245   | 0.00803 | 1.98E-188 |
| LYZ     | 12:69692420  | 0.195   | 0.00458 | <1.0E-314 |
| LZTFL1  | 3:45883992   | -0.129  | 0.00791 | 3.28E-58  |
| M6PR    | 12:9110832   | -0.0577 | 0.00414 | 2.66E-43  |
| MAB21L3 | 1:116626228  | -0.195  | 0.0117  | 5.52E-61  |
| MACF1   | 1:39662654   | 0.0922  | 0.00751 | 3.41E-34  |
| MACROD2 | 20:14024361  | 0.0316  | 0.00468 | 1.47E-11  |
| MADD    | 11:47365276  | -0.0522 | 0.0046  | 1.53E-29  |

|          |             |         |         |           |
|----------|-------------|---------|---------|-----------|
| MAEL     | 1:166911149 | -0.0242 | 0.00269 | 4.18E-19  |
| MAF1     | 8:145126375 | 0.131   | 0.0148  | 1.21E-18  |
| MAGEF1   | 3:184427787 | -0.0429 | 0.0043  | 3.11E-23  |
| MAGOHB   | 12:10762757 | -0.0594 | 0.00557 | 2.54E-26  |
| MAK      | 6:10842660  | 0.108   | 0.00871 | 1.21E-34  |
| MAL      | 2:95647049  | -0.0381 | 0.00636 | 2.34E-09  |
| MAML3    | 4:140793731 | 0.0498  | 0.00306 | 4.34E-58  |
| MAN1A1   | 6:119575001 | 0.0813  | 0.00488 | 9.47E-61  |
| MAN1A2   | 1:117959250 | -0.0489 | 0.00338 | 1.61E-46  |
| MAN1B1   | 9:139956356 | -0.0592 | 0.00462 | 5.64E-37  |
| MAN2A1   | 5:109171997 | 0.0354  | 0.00278 | 1.73E-36  |
| MAN2A2   | 15:91498127 | -0.026  | 0.00401 | 1.02E-10  |
| MAN2B2   | 4:6610622   | 0.0231  | 0.00304 | 3.93E-14  |
| MAN2C1   | 15:75681000 | -0.0608 | 0.00266 | 3.64E-110 |
| MANBA    | 4:103561709 | -0.0413 | 0.00323 | 5.22E-37  |
| MANBAL   | 20:35945343 | 0.0391  | 0.00424 | 4.39E-20  |
| MANEA    | 6:96051383  | -0.198  | 0.00492 | <1.0E-314 |
| MANF     | 3:51469107  | 0.0389  | 0.00496 | 5.75E-15  |
| MAP1LC3B | 16:87451617 | 0.292   | 0.0146  | 5.58E-86  |
| MAP2K1   | 15:66702345 | 0.0529  | 0.00496 | 2.65E-26  |
| MAP2K5   | 15:67909279 | 0.107   | 0.00328 | 5.38E-212 |
| MAP3K11  | 11:65387378 | -0.019  | 0.00253 | 8.30E-14  |
| MAP3K5   | 6:137099008 | 0.0587  | 0.00308 | 2.43E-78  |
| MAP3K7   | 6:91243924  | 0.0175  | 0.00259 | 1.91E-11  |
| MAP3K8   | 10:30759454 | -0.0288 | 0.00344 | 7.30E-17  |
| MAP3K9   | 14:71276206 | -0.036  | 0.00294 | 3.94E-34  |
| MAP4     | 3:48079577  | 0.0257  | 0.00305 | 4.49E-17  |
| MAP4K5   | 14:50845231 | -0.0845 | 0.00572 | 2.27E-48  |
| MAP6D1   | 3:183487393 | -0.0243 | 0.00329 | 1.74E-13  |
| MAP7     | 6:136882518 | -0.105  | 0.0147  | 9.12E-13  |
| MAP7D1   | 1:36627542  | -0.0366 | 0.00229 | 4.32E-56  |
| MAPK3    | 16:30081367 | -0.231  | 0.011   | 9.46E-94  |
| MAPK8    | 10:49564120 | 0.0718  | 0.00434 | 8.53E-60  |
| MAPK9    | 5:179699504 | -0.0935 | 0.00517 | 4.77E-71  |
| MAPKAPK2 | 1:206884655 | -0.0296 | 0.00444 | 2.71E-11  |
| MAPKAPK3 | 3:50735933  | 0.0833  | 0.00554 | 4.73E-50  |
| MAPRE1   | 20:31403206 | 0.0841  | 0.0061  | 1.66E-42  |
| MAPRE2   | 18:32729627 | -0.0634 | 0.00518 | 6.33E-34  |
| MARCH1   | 1:220960137 | -0.287  | 0.0143  | 8.23E-86  |

|            |              |         |         |           |
|------------|--------------|---------|---------|-----------|
| MARCH3     | 5:126171999  | -0.0945 | 0.00641 | 3.27E-48  |
| MARCH5     | 10:94129862  | -0.0207 | 0.00351 | 3.83E-09  |
| MARCO      | 2:119718028  | 0.117   | 0.00405 | 8.79E-170 |
| MARK3      | 14:103850424 | -0.0605 | 0.00514 | 1.32E-31  |
| MARK4      | 19:45793115  | -0.0519 | 0.00204 | 7.29E-135 |
| MARS2      | 2:198569051  | -0.084  | 0.00422 | 7.70E-85  |
| MASP2      | 1:11092646   | -0.0537 | 0.0041  | 1.15E-38  |
| MASTL      | 10:27399117  | -0.247  | 0.00455 | <1.0E-314 |
| MAT2A      | 2:85805373   | -0.143  | 0.0116  | 1.32E-34  |
| MAT2B      | 5:162936464  | 0.0405  | 0.00488 | 1.50E-16  |
| MATR3      | 5:138656848  | 0.0405  | 0.00354 | 5.07E-30  |
| MAX        | 14:65546361  | -0.0471 | 0.00285 | 1.23E-59  |
| MB21D1     | 6:74155346   | 0.0316  | 0.00495 | 2.02E-10  |
| MB21D2     | 3:192627060  | 0.343   | 0.0434  | 3.39E-15  |
| MBD2       | 18:51771171  | 0.0318  | 0.00486 | 6.56E-11  |
| MBD5       | 2:148937370  | 0.035   | 0.00375 | 1.64E-20  |
| MBLAC1     | 7:99732948   | -0.0696 | 0.00694 | 1.82E-23  |
| MBNL1      | 3:152184573  | 0.0243  | 0.00408 | 2.60E-09  |
| MBOAT1     | 6:20124860   | 0.056   | 0.00517 | 5.29E-27  |
| MBOAT2     | 2:9140487    | 0.0925  | 0.0101  | 9.65E-20  |
| MBP        | 18:74728800  | -0.191  | 0.0245  | 7.88E-15  |
| MBTPS1     | 16:84095451  | -0.0703 | 0.00287 | 2.75E-125 |
| MCAT       | 22:43528240  | -0.0247 | 0.00373 | 3.71E-11  |
| MCC        | 5:112336015  | 0.0382  | 0.00254 | 3.51E-50  |
| MCCC2      | 5:70923006   | 0.0354  | 0.00486 | 3.47E-13  |
| MCEE       | 2:71353963   | 0.0401  | 0.00621 | 1.12E-10  |
| MCF2L2     | 3:183146433  | 0.0306  | 0.00272 | 4.83E-29  |
| MCFD2      | 2:47150575   | 0.0602  | 0.00588 | 2.44E-24  |
| MCHR1      | 22:41116466  | -0.113  | 0.00392 | 4.51E-170 |
| MCL1       | 1:150595537  | 0.0238  | 0.00387 | 8.35E-10  |
| MCM10      | 10:13209783  | 0.0208  | 0.00297 | 2.60E-12  |
| MCM3       | 6:52192485   | -0.0252 | 0.00364 | 5.35E-12  |
| MCM3AP     | 21:47694712  | -0.0536 | 0.00249 | 9.91E-99  |
| MCM3AP-AS1 | 21:47708037  | -0.021  | 0.00349 | 1.97E-09  |
| MCM5       | 22:35806238  | 0.0691  | 0.00483 | 1.46E-45  |
| MCM6       | 2:136617524  | 0.105   | 0.00411 | 1.94E-135 |
| MCM7       | 7:99725146   | -0.054  | 0.00836 | 1.15E-10  |
| MCM8       | 20:5938207   | 0.1     | 0.00518 | 1.87E-80  |
| MCM9       | 6:119254373  | 0.19    | 0.00923 | 2.28E-90  |

|          |              |         |         |           |
|----------|--------------|---------|---------|-----------|
| MCMBP    | 10:121652073 | 0.0462  | 0.00343 | 1.05E-40  |
| MCOLN2   | 1:85403145   | -0.105  | 0.00733 | 1.15E-45  |
| MCOLN3   | 1:85465026   | 0.0333  | 0.00322 | 9.79E-25  |
| MCPH1    | 8:6276063    | -0.0456 | 0.00382 | 2.43E-32  |
| MDC1     | 6:30686838   | -0.305  | 0.0191  | 2.45E-56  |
| MDFIC    | 7:114639833  | 0.0352  | 0.0049  | 8.27E-13  |
| MDGA1    | 6:37663624   | -0.091  | 0.0026  | 1.08E-241 |
| MDM1     | 12:68720627  | -0.0679 | 0.0036  | 5.06E-77  |
| MDM2     | 12:69181478  | 0.188   | 0.00459 | <1.0E-314 |
| MDM4     | 1:204462050  | -0.0499 | 0.00346 | 2.24E-46  |
| MDN1     | 6:90336469   | -0.0274 | 0.00337 | 5.44E-16  |
| ME2      | 18:48362371  | -0.0401 | 0.00355 | 3.48E-29  |
| ME3      | 11:86383679  | -0.0595 | 0.00423 | 4.24E-44  |
| MEA1     | 6:42980218   | -0.0992 | 0.0144  | 5.51E-12  |
| MEAF6    | 1:37974497   | 0.0952  | 0.00575 | 6.07E-60  |
| MED1     | 17:37575705  | -0.0398 | 0.00641 | 5.61E-10  |
| MED10    | 5:6375337    | -0.0407 | 0.00336 | 2.96E-33  |
| MED12L   | 3:151060764  | -0.0173 | 0.00245 | 2.03E-12  |
| MED15    | 22:20935946  | 0.04    | 0.0037  | 7.51E-27  |
| MED19    | 11:57435255  | -0.0753 | 0.00452 | 7.45E-61  |
| MED21    | 12:27187211  | -0.195  | 0.00947 | 8.67E-91  |
| MED23    | 6:131898208  | 0.0755  | 0.00404 | 1.92E-75  |
| MED24    | 17:38130492  | 0.0266  | 0.00353 | 5.12E-14  |
| MED30    | 8:118551613  | -0.0303 | 0.00472 | 1.54E-10  |
| MED31    | 17:6553456   | -0.115  | 0.00772 | 3.25E-49  |
| MED4     | 13:48631483  | -0.0512 | 0.00784 | 7.18E-11  |
| MED6     | 14:71093669  | 0.0467  | 0.00728 | 1.46E-10  |
| MEF2A    | 15:100186866 | -0.0517 | 0.00576 | 3.80E-19  |
| MEF2B    | 19:19286687  | 0.0266  | 0.00219 | 2.60E-33  |
| MEFV     | 16:3292085   | -0.0567 | 0.00343 | 4.80E-60  |
| MEGF9    | 9:123501451  | 0.0338  | 0.0057  | 3.45E-09  |
| MEI1     | 22:42108253  | -0.0551 | 0.00509 | 4.77E-27  |
| MEOX1    | 17:41734439  | 0.0438  | 0.00693 | 2.95E-10  |
| MERTK    | 2:112781917  | -0.27   | 0.0108  | 3.49E-130 |
| MESDC2   | 15:81237906  | 0.037   | 0.00464 | 1.74E-15  |
| METAP2   | 12:95896810  | -0.059  | 0.00531 | 2.04E-28  |
| METTTL10 | 10:126500541 | 0.116   | 0.00784 | 1.42E-48  |
| METTTL13 | 1:171736641  | 0.0308  | 0.0041  | 7.02E-14  |
| METTTL14 | 4:119588308  | 0.0327  | 0.00399 | 3.12E-16  |

|          |              |         |         |           |
|----------|--------------|---------|---------|-----------|
| METTL17  | 14:21457945  | 0.0579  | 0.00407 | 3.75E-45  |
| METTL18  | 1:169761370  | 0.3     | 0.00862 | 8.06E-239 |
| METTL20  | 12:31803861  | -0.0402 | 0.00576 | 3.27E-12  |
| METTL21B | 12:58171726  | -0.0476 | 0.00341 | 1.18E-43  |
| METTL21D | 14:50588245  | -0.074  | 0.00602 | 2.52E-34  |
| METTL25  | 12:82888221  | 0.0647  | 0.0053  | 7.61E-34  |
| METTL2B  | 7:128148180  | 0.0617  | 0.00576 | 1.65E-26  |
| METTL3   | 14:21957934  | -0.0592 | 0.00325 | 7.31E-72  |
| METTL4   | 18:2558723   | -0.0713 | 0.00357 | 1.50E-85  |
| METTL6   | 3:15486118   | 0.0676  | 0.00812 | 1.09E-16  |
| METTL7A  | 12:51270456  | 0.1     | 0.00526 | 3.97E-78  |
| METTL8   | 2:172237959  | 0.0381  | 0.00565 | 1.80E-11  |
| METTL9   | 16:21620547  | -0.0721 | 0.00529 | 1.21E-41  |
| MFF      | 2:228237579  | 0.111   | 0.00752 | 4.80E-48  |
| MFGE8    | 15:89456948  | -0.0424 | 0.00308 | 2.07E-42  |
| MFHAS1   | 8:8639575    | 0.0693  | 0.0052  | 8.00E-40  |
| MFN1     | 3:179094386  | -0.385  | 0.015   | 4.98E-137 |
| MFN2     | 1:12045555   | -0.188  | 0.00376 | <1.0E-314 |
| MFSD1    | 3:158522463  | -0.0456 | 0.00474 | 1.03E-21  |
| MFSD5    | 12:53634662  | -0.0737 | 0.00906 | 5.21E-16  |
| MFSD6    | 2:191241196  | -0.0633 | 0.00371 | 1.05E-63  |
| MFSD9    | 2:103308802  | -0.32   | 0.00582 | <1.0E-314 |
| MGAM     | 7:141796048  | -0.106  | 0.00994 | 2.72E-26  |
| MGAT1    | 5:180225919  | -0.0529 | 0.00467 | 2.47E-29  |
| MGAT2    | 14:50112712  | -0.0223 | 0.00333 | 2.48E-11  |
| MGAT4B   | 5:179216813  | 0.0967  | 0.0114  | 3.48E-17  |
| MGC2752  | 19:59102379  | 0.0795  | 0.00452 | 1.96E-67  |
| MGC39372 | 6:2877331    | 0.0962  | 0.0101  | 3.25E-21  |
| MGC72080 | 7:97549283   | 0.905   | 0.0213  | <1.0E-314 |
| MGMT     | 10:131445027 | 0.0834  | 0.00385 | 4.70E-100 |
| MGP      | 12:15071242  | -0.0485 | 0.00437 | 2.75E-28  |
| MGRN1    | 16:4692981   | 0.0384  | 0.00455 | 4.00E-17  |
| MGST1    | 12:16504845  | 0.0966  | 0.0133  | 4.65E-13  |
| MGST2    | 4:140592662  | -0.176  | 0.00786 | 1.30E-105 |
| MGST3    | 1:165600267  | 0.185   | 0.00473 | 5.79E-293 |
| MICALCL  | 11:12383555  | -0.0895 | 0.0132  | 1.30E-11  |
| MICB     | 6:31478960   | 0.185   | 0.00797 | 4.24E-113 |
| MIER1    | 1:67388945   | 0.148   | 0.0132  | 4.19E-29  |
| MIER3    | 5:56276198   | 0.0399  | 0.00621 | 1.44E-10  |



|        |              |         |         |           |
|--------|--------------|---------|---------|-----------|
| MIF    | 22:24237221  | 0.0512  | 0.00512 | 2.44E-23  |
| MIF4GD | 17:73275747  | 0.0287  | 0.00381 | 6.89E-14  |
| MINA   | 3:97650404   | 0.0335  | 0.00358 | 1.37E-20  |
| MINK1  | 17:4825623   | 0.0538  | 0.00343 | 3.51E-54  |
| MIOS   | 7:7607667    | -0.0386 | 0.0055  | 2.75E-12  |
| MIPEP  | 13:24436762  | 0.0271  | 0.00414 | 6.88E-11  |
| MIS12  | 17:5413616   | -0.166  | 0.00535 | 3.99E-194 |
| MITD1  | 2:99814298   | -0.0365 | 0.00484 | 6.14E-14  |
| MKKS   | 20:10414950  | 0.0692  | 0.00382 | 2.60E-71  |
| MKRN2  | 3:12614107   | -0.0437 | 0.00299 | 1.58E-47  |
| MLEC   | 12:121155966 | 0.0645  | 0.00493 | 1.38E-38  |
| MLF1IP | 4:185612953  | 0.0834  | 0.00415 | 1.07E-86  |
| MLH1   | 3:37034946   | -0.0614 | 0.00453 | 3.08E-41  |
| MLH3   | 14:75504454  | 0.0915  | 0.00401 | 6.55E-110 |
| MLKL   | 16:74735148  | -0.11   | 0.00949 | 1.03E-30  |
| MLLT1  | 19:6211876   | -0.0278 | 0.0047  | 3.70E-09  |
| MLLT10 | 10:21834536  | 0.0438  | 0.00311 | 3.31E-44  |
| MLLT4  | 6:168190097  | -0.122  | 0.0104  | 1.57E-31  |
| MLLT6  | 17:36860072  | 0.0266  | 0.00444 | 2.11E-09  |
| MLX    | 17:40716235  | -0.0511 | 0.00319 | 1.61E-56  |
| MLXIP  | 12:122607951 | -0.0713 | 0.00661 | 7.57E-27  |
| MMAA   | 4:146565740  | -0.126  | 0.011   | 3.23E-30  |
| MMAB   | 12:110003672 | 0.044   | 0.00366 | 7.77E-33  |
| MMADHC | 2:150423752  | -0.144  | 0.00743 | 2.88E-81  |
| MMD    | 17:53494994  | -0.0627 | 0.0102  | 7.38E-10  |
| MME    | 3:154781945  | 0.196   | 0.0248  | 2.57E-15  |
| MMP24  | 20:33871661  | 0.0471  | 0.00428 | 7.00E-28  |
| MMP25  | 16:3106424   | -0.112  | 0.00874 | 6.69E-37  |
| MMP8   | 11:102559962 | -0.109  | 0.0161  | 1.66E-11  |
| MMP9   | 20:44645339  | -0.0633 | 0.00944 | 2.28E-11  |
| MMS22L | 6:97746897   | 0.0321  | 0.00395 | 5.14E-16  |
| MNT    | 17:2285171   | 0.0735  | 0.00622 | 8.52E-32  |
| MOCS1  | 6:39895689   | -0.0797 | 0.0109  | 3.43E-13  |
| MOCS2  | 5:52389455   | -0.0403 | 0.00498 | 7.52E-16  |
| MOG    | 6:29659124   | -0.0219 | 0.00334 | 5.20E-11  |
| MOGS   | 2:74716140   | -0.0269 | 0.00404 | 2.88E-11  |
| MON1B  | 16:77264217  | 0.0433  | 0.00313 | 9.33E-43  |
| MON2   | 12:62950769  | 0.0254  | 0.00294 | 8.85E-18  |
| MORC2  | 22:31340299  | 0.0317  | 0.00404 | 5.80E-15  |

|          |              |         |         |           |
|----------|--------------|---------|---------|-----------|
| MORC3    | 21:37660564  | -0.142  | 0.00711 | 5.01E-86  |
| MORN3    | 12:122112586 | -0.0966 | 0.00466 | 7.00E-92  |
| MORN4    | 10:99422648  | 0.0235  | 0.0039  | 1.94E-09  |
| MOSPD3   | 7:100217810  | 0.0257  | 0.00346 | 1.35E-13  |
| MOV10    | 1:113181739  | -0.0405 | 0.00437 | 2.44E-20  |
| MPC1     | 6:166802299  | -0.0306 | 0.00442 | 4.92E-12  |
| MPC2     | 1:167842652  | 0.0388  | 0.00649 | 2.37E-09  |
| MPDU1    | 17:7526887   | -0.067  | 0.00459 | 2.55E-47  |
| MPHOSPH6 | 16:82166941  | -0.281  | 0.00655 | <1.0E-314 |
| MPO      | 17:56367065  | -0.0403 | 0.00676 | 2.51E-09  |
| MPP5     | 14:67756236  | 0.0363  | 0.00558 | 8.61E-11  |
| MPP7     | 10:28617810  | 0.16    | 0.00602 | 2.33E-145 |
| MPPE1    | 18:11917083  | 0.196   | 0.00997 | 1.97E-83  |
| MPPED2   | 11:30600383  | -0.0505 | 0.00475 | 3.95E-26  |
| MPRIP    | 17:17091746  | -0.161  | 0.0109  | 3.31E-48  |
| MPZ      | 1:161306663  | 0.127   | 0.0141  | 2.26E-19  |
| MPZL1    | 1:167737311  | 0.19    | 0.0123  | 8.13E-53  |
| MPZL2    | 11:118128455 | 0.184   | 0.00577 | 2.33E-204 |
| MPZL3    | 11:118123517 | 0.0799  | 0.0062  | 1.79E-37  |
| MR1      | 1:181025110  | -0.0461 | 0.00563 | 3.56E-16  |
| MRAS     | 3:138070901  | 0.0346  | 0.00524 | 4.58E-11  |
| MRE11A   | 11:94210967  | -0.11   | 0.00337 | 1.09E-211 |
| MREG     | 2:216868598  | 0.036   | 0.00544 | 4.11E-11  |
| MRGBP    | 20:61433141  | -0.0843 | 0.00845 | 3.38E-23  |
| MRI1     | 19:13881701  | -0.0466 | 0.0051  | 1.01E-19  |
| MROH8    | 20:35803303  | 0.0152  | 0.00215 | 1.63E-12  |
| MRPL10   | 17:45889404  | 0.113   | 0.00681 | 3.83E-60  |
| MRPL14   | 6:44081718   | -0.0348 | 0.00473 | 2.21E-13  |
| MRPL18   | 6:160188891  | -0.197  | 0.00437 | <1.0E-314 |
| MRPL19   | 2:75864616   | 0.0283  | 0.00409 | 4.73E-12  |
| MRPL21   | 11:68615600  | 0.228   | 0.00552 | <1.0E-314 |
| MRPL22   | 5:154283385  | 0.0584  | 0.00951 | 8.66E-10  |
| MRPL27   | 17:48442121  | 0.0342  | 0.00298 | 4.18E-30  |
| MRPL28   | 16:431609    | 0.125   | 0.0142  | 2.47E-18  |
| MRPL30   | 2:99759865   | -0.0841 | 0.00447 | 2.47E-76  |
| MRPL32   | 7:42973722   | -0.0459 | 0.00768 | 2.41E-09  |
| MRPL35   | 2:86452673   | -0.136  | 0.00948 | 9.69E-46  |
| MRPL37   | 1:54683856   | -0.0272 | 0.00374 | 3.71E-13  |
| MRPL39   | 21:26997490  | -0.0471 | 0.00515 | 8.26E-20  |

|           |              |         |         |           |
|-----------|--------------|---------|---------|-----------|
| MRPL40    | 22:19421293  | 0.0625  | 0.00767 | 4.79E-16  |
| MRPL42    | 12:93916772  | -0.166  | 0.00771 | 5.16E-99  |
| MRPL43    | 10:102746503 | -0.106  | 0.00352 | 7.65E-185 |
| MRPL44    | 2:224788346  | 0.0503  | 0.00504 | 3.01E-23  |
| MRPL45    | 17:36464561  | 0.174   | 0.0251  | 4.83E-12  |
| MRPL48    | 11:73480930  | -0.0438 | 0.00552 | 2.35E-15  |
| MRPL51    | 12:6613076   | -0.11   | 0.00452 | 9.88E-125 |
| MRPL53    | 2:74681502   | -0.0536 | 0.00583 | 5.87E-20  |
| MRPL54    | 19:3761652   | 0.0715  | 0.00454 | 1.24E-54  |
| MRPS10    | 6:42173975   | -0.0467 | 0.00488 | 1.78E-21  |
| MRPS18C   | 4:84351153   | -0.333  | 0.00751 | <1.0E-314 |
| MRPS21    | 1:150255587  | -0.0941 | 0.00694 | 3.54E-41  |
| MRPS22    | 3:139051919  | 0.0204  | 0.00297 | 7.13E-12  |
| MRPS24    | 7:43906513   | 0.0432  | 0.00737 | 5.01E-09  |
| MRPS25    | 3:15111397   | 0.0226  | 0.00343 | 4.73E-11  |
| MRPS6     | 21:35401161  | 0.029   | 0.00325 | 6.08E-19  |
| MRPS7     | 17:73240009  | 0.0853  | 0.00505 | 1.70E-62  |
| MRPS9     | 2:105688786  | 0.0445  | 0.00407 | 1.60E-27  |
| MRS2      | 6:24414976   | -0.0539 | 0.00492 | 1.06E-27  |
| MRT04     | 1:19587878   | -0.0607 | 0.00632 | 1.19E-21  |
| MRV11     | 11:10581127  | 0.0912  | 0.013   | 2.76E-12  |
| MRV11-AS1 | 11:10563090  | 0.0699  | 0.00624 | 8.82E-29  |
| MS4A2     | 11:59877697  | -0.094  | 0.0108  | 5.74E-18  |
| MS4A4A    | 11:60039917  | 0.109   | 0.0156  | 2.62E-12  |
| MS4A6A    | 11:59936979  | 0.087   | 0.00576 | 1.91E-50  |
| MSANTD4   | 11:105905847 | 0.0634  | 0.00952 | 3.05E-11  |
| MSC       | 8:72754639   | -0.0367 | 0.00485 | 4.72E-14  |
| MSH2      | 2:47590390   | -0.279  | 0.00678 | <1.0E-314 |
| MSH3      | 5:79902336   | -0.185  | 0.00436 | <1.0E-314 |
| MSH4      | 1:76385839   | -0.319  | 0.0147  | 1.31E-100 |
| MSH5      | 6:31711124   | 0.033   | 0.00353 | 1.38E-20  |
| MSH6      | 2:48070873   | 0.0586  | 0.00429 | 9.14E-42  |
| MSMO1     | 4:166264119  | -0.137  | 0.00605 | 4.43E-109 |
| MSR1      | 8:16038003   | 0.2     | 0.0152  | 7.74E-39  |
| MSRA      | 8:9945667    | -0.131  | 0.0106  | 1.18E-34  |
| MSRB2     | 10:23361114  | 0.32    | 0.0137  | 5.63E-115 |
| MT1A      | 16:56644650  | 0.0878  | 0.00668 | 7.86E-39  |
| MT1H      | 16:56684241  | -0.044  | 0.00741 | 3.02E-09  |
| MT1L      | 16:56655171  | -0.739  | 0.0307  | 2.08E-121 |

|         |              |         |         |           |
|---------|--------------|---------|---------|-----------|
| MTCH1   | 6:36911511   | 0.0332  | 0.00563 | 3.89E-09  |
| MTCH2   | 11:47646640  | 0.0389  | 0.00409 | 2.96E-21  |
| MTERFD1 | 8:97239126   | 0.0468  | 0.00504 | 2.10E-20  |
| MTERFD2 | 2:242054129  | 0.125   | 0.00498 | 1.21E-130 |
| MTERFD3 | 12:107370590 | 0.121   | 0.0127  | 3.05E-21  |
| MTF2    | 1:93508182   | -0.0364 | 0.00383 | 3.14E-21  |
| MTFMT   | 15:65258834  | 0.0349  | 0.0045  | 1.17E-14  |
| MTFR1   | 8:66524904   | -0.2    | 0.00719 | 2.32E-158 |
| MTHFD2  | 2:74436225   | -0.0395 | 0.00652 | 1.42E-09  |
| MTHFR   | 1:11839201   | -0.0875 | 0.00614 | 3.08E-45  |
| MTHFS   | 15:80130958  | 0.0754  | 0.00659 | 5.82E-30  |
| MTIF2   | 2:55498584   | 0.416   | 0.0223  | 8.56E-75  |
| MTMR10  | 15:31245880  | -0.0264 | 0.00355 | 1.17E-13  |
| MTMR12  | 5:32233963   | -0.13   | 0.0131  | 5.78E-23  |
| MTMR3   | 22:30236395  | -0.0203 | 0.00323 | 3.56E-10  |
| MTMR6   | 13:25859816  | -0.0873 | 0.00442 | 9.79E-84  |
| MTO1    | 6:74195981   | 0.0577  | 0.00366 | 6.66E-55  |
| MTOR    | 1:11289161   | -0.031  | 0.00314 | 8.94E-23  |
| MTPAP   | 10:30597434  | -0.186  | 0.00462 | <1.0E-314 |
| MTRF1   | 13:41845719  | 0.0594  | 0.00557 | 2.96E-26  |
| MTRR    | 5:7892173    | 0.0561  | 0.00472 | 3.48E-32  |
| MTSS1   | 8:125576094  | -0.0473 | 0.00595 | 2.14E-15  |
| MTUS1   | 8:17660151   | -0.29   | 0.00878 | 9.94E-218 |
| MUC20   | 3:195476085  | -0.153  | 0.00794 | 9.75E-80  |
| MUL1    | 1:20834610   | -0.0763 | 0.00658 | 1.03E-30  |
| MUT     | 6:49443984   | -0.126  | 0.00366 | 1.06E-234 |
| MVB12B  | 9:129206832  | -0.0629 | 0.00401 | 2.39E-54  |
| MVP     | 16:29845685  | -0.0623 | 0.00381 | 7.87E-59  |
| MX1     | 21:42793800  | 0.233   | 0.0174  | 3.06E-40  |
| MX2     | 21:42743821  | 0.182   | 0.0166  | 2.02E-27  |
| MXI1    | 10:112035723 | -0.0612 | 0.00828 | 1.66E-13  |
| MYBL2   | 20:42313552  | -0.0376 | 0.00509 | 1.81E-13  |
| MYBPC3  | 11:47397353  | 0.0257  | 0.00202 | 1.55E-36  |
| MYBPH   | 1:203156080  | 0.0329  | 0.00304 | 6.18E-27  |
| MYCT1   | 6:153043035  | 0.108   | 0.0114  | 7.37E-21  |
| MYEF2   | 15:48462320  | -0.767  | 0.0448  | 6.51E-64  |
| MYH10   | 17:8426602   | 0.017   | 0.0023  | 1.52E-13  |
| MYH11   | 16:15748380  | -0.113  | 0.00252 | <1.0E-314 |
| MYH3    | 17:10610213  | -0.0177 | 0.00255 | 4.79E-12  |

|         |              |         |         |           |
|---------|--------------|---------|---------|-----------|
| MYL6B   | 12:56564811  | -0.0848 | 0.00582 | 3.12E-47  |
| MYLIP   | 6:16111361   | 0.0396  | 0.00577 | 6.93E-12  |
| MYO10   | 5:16927336   | 0.0285  | 0.00236 | 2.96E-33  |
| MYO15B  | 17:73585569  | -0.213  | 0.0074  | 2.30E-169 |
| MYO18A  | 17:27517415  | -0.132  | 0.0121  | 1.71E-27  |
| MYO1D   | 17:31119037  | -0.0842 | 0.0041  | 4.37E-90  |
| MYO1E   | 15:59699057  | 0.0488  | 0.00412 | 6.14E-32  |
| MYO3B   | 2:171076374  | 0.0142  | 0.00228 | 4.15E-10  |
| MYO5A   | 15:52746722  | -0.0828 | 0.00633 | 1.73E-38  |
| MYO5C   | 15:52591752  | -0.0933 | 0.00619 | 2.41E-50  |
| MYO6    | 6:76488642   | -0.038  | 0.00466 | 4.97E-16  |
| MYO7B   | 2:128353649  | 0.0747  | 0.00747 | 2.24E-23  |
| MYOF    | 10:95203701  | 0.108   | 0.00986 | 1.35E-27  |
| MYOM1   | 18:3248888   | 0.0692  | 0.00308 | 1.42E-106 |
| MYOM2   | 8:2082015    | -0.163  | 0.00369 | <1.0E-314 |
| MYOZ2   | 4:120155096  | -0.0285 | 0.00427 | 2.66E-11  |
| MYRIP   | 3:40335616   | -0.0297 | 0.00263 | 2.29E-29  |
| MYSM1   | 1:59201213   | -0.0341 | 0.00347 | 1.41E-22  |
| MZT2A   | 2:132243501  | 0.308   | 0.0141  | 4.93E-101 |
| N4BP2   | 4:40060368   | -0.055  | 0.00458 | 8.29E-33  |
| N4BP2L2 | 13:33126139  | 0.0244  | 0.00305 | 1.59E-15  |
| N6AMT2  | 13:21378024  | -0.18   | 0.00975 | 8.71E-74  |
| NAA15   | 4:140236505  | 0.0259  | 0.00331 | 6.23E-15  |
| NAA16   | 13:41876544  | 0.0432  | 0.00456 | 4.14E-21  |
| NAA25   | 12:112479140 | -0.0506 | 0.00685 | 1.79E-13  |
| NAA38   | 7:117824239  | -0.143  | 0.0055  | 5.03E-141 |
| NAA60   | 16:3523626   | 0.0914  | 0.00767 | 2.46E-32  |
| NAAA    | 4:76805267   | -0.195  | 0.00475 | <1.0E-314 |
| NAALAD2 | 11:89861586  | -0.0177 | 0.00288 | 7.87E-10  |
| NAB1    | 2:191539496  | 0.0338  | 0.0049  | 6.23E-12  |
| NADKD1  | 5:36242354   | 0.0577  | 0.00455 | 2.82E-36  |
| NADSYN1 | 11:71132868  | -0.0232 | 0.00338 | 7.84E-12  |
| NAE1    | 16:66865559  | -0.0291 | 0.00446 | 7.29E-11  |
| NAF1    | 4:164083253  | -0.0435 | 0.00585 | 1.13E-13  |
| NAGK    | 2:71272082   | 0.234   | 0.00542 | <1.0E-314 |
| NANS    | 9:100824752  | -0.0525 | 0.00429 | 5.46E-34  |
| NAP1L1  | 12:76428875  | -0.0581 | 0.00751 | 1.18E-14  |
| NAP1L5  | 4:89621072   | 0.101   | 0.00674 | 2.08E-49  |
| NAPB    | 20:23401586  | -0.106  | 0.00684 | 1.67E-52  |

|         |              |         |         |           |
|---------|--------------|---------|---------|-----------|
| NAPG    | 18:10547559  | -0.107  | 0.00373 | 1.46E-167 |
| NAPRT1  | 8:144681777  | 0.0545  | 0.00247 | 1.32E-103 |
| NAPSA   | 19:50863023  | 0.0367  | 0.00458 | 1.25E-15  |
| NARS    | 18:55248890  | -0.0313 | 0.00326 | 1.09E-21  |
| NARS2   | 11:78282632  | 0.15    | 0.00519 | 7.01E-171 |
| NAT8B   | 2:73927931   | -0.115  | 0.00664 | 1.41E-65  |
| NAV3    | 12:78427904  | 0.0279  | 0.0032  | 3.73E-18  |
| NBAS    | 2:15720486   | 0.0194  | 0.00287 | 1.36E-11  |
| NBEA    | 13:35662801  | -0.178  | 0.0148  | 8.94E-33  |
| NBN     | 8:90958530   | 0.0942  | 0.00583 | 3.23E-57  |
| NBPF11  | 1:146488976  | 0.121   | 0.00919 | 5.13E-39  |
| NBPF3   | 1:21795388   | 0.0579  | 0.00359 | 4.39E-57  |
| NBR1    | 17:41370072  | 0.0369  | 0.00467 | 3.56E-15  |
| NBR2    | 17:41298499  | 0.111   | 0.0042  | 1.97E-143 |
| NCALD   | 8:103118484  | -0.0824 | 0.00969 | 2.44E-17  |
| NCAM1   | 11:112826186 | 0.116   | 0.0174  | 2.56E-11  |
| NCAM2   | 21:22428841  | -0.0409 | 0.00584 | 2.83E-12  |
| NCAPD2  | 12:6627889   | -0.105  | 0.00365 | 1.40E-167 |
| NCAPD3  | 11:134023859 | -0.0567 | 0.00491 | 1.43E-30  |
| NCAPG2  | 7:158478691  | -0.263  | 0.0161  | 2.53E-58  |
| NCAPH2  | 22:50964153  | -0.138  | 0.012   | 2.68E-30  |
| NCBP2   | 3:196620788  | -0.0315 | 0.00506 | 5.16E-10  |
| NCEH1   | 3:172347134  | 0.0276  | 0.00428 | 1.27E-10  |
| NCF2    | 1:183564287  | -0.0379 | 0.00406 | 1.57E-20  |
| NCK1    | 3:136571480  | 0.0305  | 0.00441 | 5.04E-12  |
| NCK2    | 2:106509202  | -0.0644 | 0.00356 | 8.99E-71  |
| NCKAP1  | 2:183916217  | -0.0788 | 0.00511 | 1.67E-52  |
| NCKAP1L | 12:54890515  | -0.0384 | 0.00349 | 9.17E-28  |
| NCLN    | 19:3186493   | -0.0221 | 0.00336 | 5.34E-11  |
| NCOA1   | 2:24986564   | 0.0268  | 0.00384 | 3.10E-12  |
| NCOA2   | 8:71146050   | -0.0378 | 0.00433 | 3.63E-18  |
| NCOA3   | 20:46269884  | -0.0649 | 0.006   | 5.32E-27  |
| NCOA7   | 6:126162143  | -0.0546 | 0.0036  | 6.93E-51  |
| NCOR1   | 17:16131927  | 0.087   | 0.00516 | 5.04E-62  |
| NCR3    | 6:31543827   | 0.0751  | 0.00553 | 2.39E-41  |
| NCSTN   | 1:160317021  | 0.0674  | 0.0027  | 1.06E-129 |
| NDC80   | 18:2585077   | 0.107   | 0.00527 | 3.97E-88  |
| NDE1    | 16:15810211  | -0.0596 | 0.00476 | 1.88E-35  |
| NDFIP1  | 5:141466059  | 0.0262  | 0.00331 | 3.09E-15  |

|         |             |         |         |           |
|---------|-------------|---------|---------|-----------|
| NDN     | 15:23944930 | -0.0523 | 0.00573 | 9.34E-20  |
| NDRG1   | 8:134296742 | 0.0381  | 0.00318 | 1.19E-32  |
| NDRG3   | 20:35237202 | 0.0607  | 0.0101  | 1.67E-09  |
| NDST1   | 5:149868870 | 0.215   | 0.00534 | <1.0E-314 |
| NDST2   | 10:75572103 | 0.0288  | 0.0037  | 8.32E-15  |
| NDUFA10 | 2:240894871 | -0.042  | 0.00306 | 3.75E-42  |
| NDUFA12 | 12:95397552 | -0.098  | 0.00506 | 8.69E-81  |
| NDUFA2  | 5:140030306 | 0.0461  | 0.0046  | 1.91E-23  |
| NDUFA3  | 19:54631097 | -0.05   | 0.0075  | 2.76E-11  |
| NDUFA6  | 22:42486080 | -0.24   | 0.0139  | 7.09E-65  |
| NDUFAF1 | 15:41685917 | 0.0851  | 0.00515 | 7.92E-60  |
| NDUFAF4 | 6:97354319  | -0.0835 | 0.0111  | 5.59E-14  |
| NDUFAF5 | 20:13786587 | -0.126  | 0.00525 | 2.17E-121 |
| NDUFAF6 | 8:96020877  | -0.038  | 0.00599 | 2.41E-10  |
| NDUFAF7 | 2:37465055  | 0.088   | 0.0091  | 6.44E-22  |
| NDUFB1  | 14:92587277 | -0.0423 | 0.00394 | 1.44E-26  |
| NDUFB10 | 16:2007740  | -0.0573 | 0.00736 | 8.08E-15  |
| NDUFB2  | 7:140348291 | 0.0598  | 0.007   | 1.67E-17  |
| NDUFB9  | 8:125562029 | -0.0501 | 0.00726 | 5.77E-12  |
| NDUFC2  | 11:77797626 | 0.168   | 0.0059  | 1.87E-166 |
| NDUFS1  | 2:207039604 | 0.0208  | 0.00278 | 7.41E-14  |
| NDUFS2  | 1:161186313 | 0.0285  | 0.0032  | 5.97E-19  |
| NDUFS4  | 5:52954819  | 0.0437  | 0.00727 | 1.97E-09  |
| NDUFS5  | 1:39520552  | 0.113   | 0.00506 | 5.49E-106 |
| NDUFS8  | 11:67802907 | -0.0404 | 0.00483 | 8.29E-17  |
| NDUFV3  | 21:44323720 | 0.0959  | 0.00614 | 9.25E-54  |
| NEB     | 2:152619186 | -0.139  | 0.00723 | 3.71E-80  |
| NEBL    | 10:21486604 | -1.3    | 0.0267  | <1.0E-314 |
| NECAB2  | 16:84081330 | -0.0409 | 0.00347 | 9.95E-32  |
| NECAP1  | 12:8214856  | -0.081  | 0.00469 | 6.43E-65  |
| NECAP2  | 1:16795685  | -0.0788 | 0.00356 | 3.89E-104 |
| NEDD1   | 12:97338862 | -0.0774 | 0.00353 | 2.49E-102 |
| NEDD4   | 15:56216037 | -0.149  | 0.00615 | 2.44E-123 |
| NEDD4L  | 18:55723899 | -0.106  | 0.00866 | 6.31E-34  |
| NEDD8   | 14:24686145 | 0.297   | 0.0134  | 1.95E-104 |
| NEDD9   | 6:11188939  | -0.034  | 0.00384 | 1.15E-18  |
| NEFL    | 8:24820164  | 0.0508  | 0.00488 | 3.77E-25  |
| NEGR1   | 1:72752230  | 0.0558  | 0.00305 | 1.60E-72  |
| NEIL2   | 8:11642545  | -0.0189 | 0.00319 | 3.75E-09  |

|           |              |         |         |           |
|-----------|--------------|---------|---------|-----------|
| NEIL3     | 4:178260872  | 0.094   | 0.0101  | 2.81E-20  |
| NEK1      | 4:170533736  | -0.097  | 0.00629 | 1.82E-52  |
| NEK11     | 3:130703761  | -0.0644 | 0.00395 | 2.54E-58  |
| NEK3      | 13:52704624  | -0.0442 | 0.00426 | 6.14E-25  |
| NEK6      | 9:126985858  | 0.112   | 0.00393 | 1.87E-165 |
| NELL2     | 12:45220936  | 0.23    | 0.0118  | 1.52E-81  |
| NENF      | 1:212611054  | 0.037   | 0.00432 | 1.39E-17  |
| NEO1      | 15:73343575  | 0.0955  | 0.00414 | 3.82E-112 |
| NF1       | 17:29724708  | 0.0184  | 0.00296 | 5.07E-10  |
| NFAM1     | 22:42796914  | -0.0361 | 0.00416 | 4.90E-18  |
| NFAT5     | 16:69686912  | 0.0191  | 0.00324 | 4.22E-09  |
| NFATC2    | 20:50092287  | 0.0493  | 0.0056  | 1.75E-18  |
| NFE2      | 12:54685880  | 0.207   | 0.0171  | 3.09E-33  |
| NFIB      | 9:14201012   | 0.0369  | 0.00574 | 1.39E-10  |
| NFIX      | 19:13200977  | -0.55   | 0.0562  | 1.97E-22  |
| NFKB1     | 4:103475444  | -0.0222 | 0.0035  | 2.70E-10  |
| NFKBIA    | 14:35847480  | -0.112  | 0.00834 | 1.54E-40  |
| NFRKB     | 11:129695058 | 0.0556  | 0.00362 | 3.53E-52  |
| NFU1      | 2:69598243   | -0.0307 | 0.00453 | 1.33E-11  |
| NFXL1     | 4:47812183   | -0.655  | 0.0127  | <1.0E-314 |
| NICN1     | 3:49480908   | 0.0254  | 0.00417 | 1.24E-09  |
| NID1      | 1:236260164  | 0.0334  | 0.00542 | 7.29E-10  |
| NID2      | 14:52491754  | 0.0135  | 0.00225 | 2.30E-09  |
| NIF3L1    | 2:201768238  | 0.029   | 0.00424 | 8.45E-12  |
| NINJ2     | 12:697095    | 0.102   | 0.00493 | 2.52E-91  |
| NINL      | 20:25524743  | -0.0276 | 0.00305 | 1.81E-19  |
| NIP7      | 16:69374461  | 0.0532  | 0.00604 | 1.71E-18  |
| NIPA1     | 15:23051312  | -0.0402 | 0.00318 | 4.68E-36  |
| NIPA2     | 15:23033076  | 0.0485  | 0.00314 | 1.86E-52  |
| NIPAL2    | 8:99305363   | 0.391   | 0.00928 | <1.0E-314 |
| NIPAL3    | 1:24739220   | 0.0346  | 0.00391 | 1.09E-18  |
| NIPSNAP1  | 22:29978331  | -0.0506 | 0.00357 | 7.04E-45  |
| NIPSNAP3A | 9:107527916  | -0.0925 | 0.00537 | 8.77E-65  |
| NIPSNAP3B | 9:107525011  | -0.163  | 0.00962 | 1.41E-62  |
| NIT1      | 1:161094834  | -0.0625 | 0.0035  | 3.00E-69  |
| NKG7      | 19:51885010  | -0.0947 | 0.0124  | 3.13E-14  |
| NKTR      | 3:42656578   | 0.0497  | 0.00431 | 1.75E-30  |
| NKX3-1    | 8:23533898   | -0.239  | 0.0156  | 4.26E-52  |
| NLE1      | 17:33493071  | -0.0366 | 0.00476 | 1.78E-14  |



|         |              |         |         |           |
|---------|--------------|---------|---------|-----------|
| NLN     | 5:65038564   | -0.121  | 0.00447 | 1.67E-152 |
| NLRC4   | 2:32489851   | 0.0341  | 0.00561 | 1.34E-09  |
| NLRC5   | 16:57061189  | -0.043  | 0.00317 | 3.46E-41  |
| NLRP1   | 17:5480145   | 0.108   | 0.0105  | 1.83E-24  |
| NLRP3   | 1:247612202  | 0.0551  | 0.00562 | 1.57E-22  |
| NLRP6   | 11:268020    | 0.0391  | 0.00469 | 8.80E-17  |
| NMD3    | 3:160936364  | -0.0951 | 0.00432 | 5.31E-103 |
| NME1    | 17:49231180  | -0.149  | 0.0051  | 5.56E-174 |
| NME4    | 16:449554    | 0.137   | 0.0146  | 8.38E-21  |
| NME7    | 1:169214822  | 0.111   | 0.0141  | 3.59E-15  |
| NME8    | 7:37875986   | 0.117   | 0.006   | 1.84E-81  |
| NMI     | 2:152130288  | -0.0398 | 0.00633 | 3.77E-10  |
| NMNAT3  | 3:139396758  | 0.0434  | 0.00391 | 2.53E-28  |
| NMRAL1  | 16:4525265   | -0.071  | 0.00361 | 3.76E-83  |
| NMRK1   | 9:77684690   | -0.241  | 0.0057  | <1.0E-314 |
| NMT1    | 17:43169281  | -0.0247 | 0.00386 | 1.62E-10  |
| NMT2    | 10:15238886  | -0.119  | 0.00597 | 4.94E-85  |
| NMUR1   | 2:232386999  | 0.0233  | 0.00361 | 1.22E-10  |
| NNT     | 5:43726241   | 0.109   | 0.00748 | 3.77E-47  |
| NOA1    | 4:57843295   | 0.064   | 0.00789 | 6.34E-16  |
| NOC3L   | 10:96104086  | -0.0941 | 0.00598 | 1.61E-54  |
| NOD2    | 16:50714029  | 0.256   | 0.00419 | <1.0E-314 |
| NOL10   | 2:10752617   | -0.0469 | 0.00764 | 9.17E-10  |
| NOL12   | 22:38085523  | 0.0275  | 0.00325 | 3.43E-17  |
| NOL6    | 9:33520629   | -0.0201 | 0.00305 | 4.54E-11  |
| NOL9    | 1:6585804    | 0.0633  | 0.00625 | 6.96E-24  |
| NOP10   | 15:34631927  | 0.0774  | 0.00822 | 6.61E-21  |
| NOP14   | 4:3015001    | 0.0342  | 0.00335 | 3.23E-24  |
| NOP16   | 5:175824324  | -0.0555 | 0.00863 | 1.42E-10  |
| NOS1AP  | 1:162019673  | -0.0766 | 0.0087  | 1.67E-18  |
| NOTCH1  | 9:139456353  | 0.0476  | 0.0054  | 1.63E-18  |
| NOV     | 8:120460700  | 0.135   | 0.0146  | 3.95E-20  |
| NOXRED1 | 14:77872979  | 0.0373  | 0.00616 | 1.44E-09  |
| NPAS2   | 2:101423151  | -0.0274 | 0.003   | 8.55E-20  |
| NPAT    | 11:108021205 | 0.0444  | 0.00387 | 3.53E-30  |
| NPC1    | 18:21107628  | -0.037  | 0.00439 | 5.01E-17  |
| NPC2    | 14:74966763  | 0.0462  | 0.00494 | 1.10E-20  |
| NPDC1   | 9:139949830  | -0.0568 | 0.00759 | 8.33E-14  |
| NPEPL1  | 20:57292123  | -0.0468 | 0.00436 | 1.24E-26  |

|         |              |         |         |           |
|---------|--------------|---------|---------|-----------|
| NPEPPS  | 17:45635239  | -0.0693 | 0.0063  | 8.34E-28  |
| NPHP3   | 3:132441268  | -0.104  | 0.00304 | 7.29E-231 |
| NPHP4   | 1:6053630    | 0.0147  | 0.00176 | 7.66E-17  |
| NPIPL3  | 16:21368513  | 0.334   | 0.0556  | 2.02E-09  |
| NPPA    | 1:11873512   | -0.127  | 0.0141  | 2.72E-19  |
| NPRL3   | 16:178543    | -0.227  | 0.0122  | 1.91E-74  |
| NQO2    | 6:3003970    | 0.29    | 0.00851 | 1.14E-229 |
| NR1D1   | 17:38248354  | -0.0619 | 0.00591 | 1.99E-25  |
| NR1D2   | 3:23956575   | -0.0681 | 0.00699 | 3.18E-22  |
| NR1H3   | 11:47315917  | 0.0261  | 0.0031  | 4.56E-17  |
| NR2F6   | 19:17340459  | -0.0416 | 0.00583 | 1.14E-12  |
| NR6A1   | 9:127410515  | -0.0294 | 0.00387 | 3.33E-14  |
| NRBF2   | 10:64873883  | 0.0364  | 0.00541 | 1.90E-11  |
| NRBP1   | 2:27656823   | 0.0231  | 0.0027  | 1.57E-17  |
| NRD1    | 1:52346354   | 0.052   | 0.00334 | 2.65E-53  |
| NRDE2   | 14:90740588  | -0.0181 | 0.003   | 1.68E-09  |
| NREP    | 5:111091087  | -0.0631 | 0.00815 | 1.21E-14  |
| NRF1    | 7:129313989  | -0.0225 | 0.00273 | 2.24E-16  |
| NRG1    | 8:32432796   | 0.151   | 0.00394 | 1.25E-281 |
| NRIP3   | 11:9024460   | -0.0319 | 0.0044  | 4.77E-13  |
| NRN1    | 6:5989938    | 0.088   | 0.00541 | 4.49E-58  |
| NS3BP   | 11:750238    | 0.0685  | 0.00582 | 1.33E-31  |
| NSFL1C  | 20:1451628   | 0.12    | 0.00429 | 4.44E-160 |
| NSG1    | 4:4350655    | 0.189   | 0.0064  | 2.06E-176 |
| NSL1    | 1:212955231  | 0.0875  | 0.00383 | 6.94E-110 |
| NSMAF   | 8:59501767   | -0.0206 | 0.00324 | 2.28E-10  |
| NSMCE4A | 10:123731471 | 0.0406  | 0.00421 | 9.44E-22  |
| NSUN2   | 5:6605532    | -0.102  | 0.00305 | 3.73E-224 |
| NSUN4   | 1:46806429   | -0.105  | 0.00336 | 6.07E-198 |
| NSUN6   | 10:18852539  | 0.045   | 0.00434 | 6.12E-25  |
| NSUN7   | 4:40731514   | -0.0988 | 0.00498 | 2.24E-84  |
| NT5C    | 17:73172526  | -0.0277 | 0.00328 | 4.12E-17  |
| NT5C2   | 10:104860053 | 0.0631  | 0.00421 | 1.21E-49  |
| NT5C3   | 7:33035342   | 0.14    | 0.00935 | 2.22E-49  |
| NT5C3L  | 17:39975164  | -0.294  | 0.00495 | <1.0E-314 |
| NT5DC2  | 3:52573096   | 0.0165  | 0.00204 | 7.08E-16  |
| NT5DC3  | 12:104180872 | -0.229  | 0.00467 | <1.0E-314 |
| NT5E    | 6:86132619   | 0.17    | 0.007   | 3.25E-123 |
| NT5M    | 17:17183513  | -0.0613 | 0.004   | 6.60E-52  |

|          |              |         |         |           |
|----------|--------------|---------|---------|-----------|
| NTAN1    | 16:15151361  | 0.0789  | 0.00623 | 2.92E-36  |
| NTNG1    | 1:107678268  | -0.0594 | 0.00919 | 1.14E-10  |
| NTPCR    | 1:233086882  | -0.247  | 0.00659 | 6.30E-274 |
| NUAK2    | 1:205304806  | -0.0403 | 0.00379 | 3.61E-26  |
| NUBP2    | 16:1846089   | -0.0424 | 0.00433 | 2.23E-22  |
| NUBPL    | 14:32297243  | -0.0436 | 0.00516 | 3.90E-17  |
| NUCB2    | 11:17299969  | -0.0495 | 0.00594 | 9.28E-17  |
| NUCKS1   | 1:205689807  | 0.027   | 0.00395 | 9.19E-12  |
| NUDCD1   | 8:110283353  | -0.0508 | 0.00737 | 5.79E-12  |
| NUDCD3   | 7:44538713   | -0.0287 | 0.00366 | 5.96E-15  |
| NUDT1    | 7:2260715    | -0.0687 | 0.00437 | 1.94E-54  |
| NUDT12   | 5:102871079  | 0.258   | 0.00752 | 2.44E-233 |
| NUDT14   | 14:105648963 | -0.0834 | 0.011   | 3.57E-14  |
| NUDT16P1 | 3:131081669  | 0.161   | 0.0115  | 6.59E-44  |
| NUDT2    | 9:34320315   | 0.104   | 0.00542 | 7.59E-79  |
| NUDT3    | 6:34335285   | 0.0391  | 0.00588 | 3.11E-11  |
| NUDT5    | 10:12261852  | -0.0937 | 0.00794 | 9.75E-32  |
| NUDT9    | 4:88376782   | 0.0273  | 0.00362 | 5.53E-14  |
| NUFIP2   | 17:27600063  | 0.037   | 0.0045  | 2.14E-16  |
| NUMA1    | 11:71739423  | -0.0156 | 0.00245 | 2.49E-10  |
| NUMB     | 14:73788804  | 0.0289  | 0.00403 | 8.04E-13  |
| NUP107   | 12:69079909  | 0.0886  | 0.00372 | 4.96E-119 |
| NUP133   | 1:229627666  | 0.0524  | 0.00306 | 3.21E-64  |
| NUP153   | 6:17716485   | -0.0374 | 0.00472 | 2.66E-15  |
| NUP210L  | 1:154127549  | -0.697  | 0.0235  | 2.34E-179 |
| NUP35    | 2:184048695  | 0.0381  | 0.00617 | 7.10E-10  |
| NUP43    | 6:150003226  | 0.0525  | 0.00379 | 5.07E-43  |
| NUP50    | 22:45570114  | 0.181   | 0.00779 | 5.08E-114 |
| NUP54    | 4:77046810   | -0.0503 | 0.00794 | 2.46E-10  |
| NUP62    | 19:50405218  | 0.0171  | 0.00244 | 2.36E-12  |
| NUP88    | 17:5282761   | -0.127  | 0.00431 | 4.67E-177 |
| NUP98    | 11:3812346   | -0.0257 | 0.00343 | 7.47E-14  |
| NUPL2    | 7:23229774   | 0.0238  | 0.00331 | 7.22E-13  |
| NUSAP1   | 15:41630770  | -0.131  | 0.00654 | 8.85E-86  |
| NVL      | 1:224515776  | 0.0955  | 0.00637 | 9.48E-50  |
| NXF1     | 11:62592195  | 0.0245  | 0.00377 | 8.54E-11  |
| NXPE3    | 3:101498077  | 0.201   | 0.00906 | 1.04E-104 |
| OAS1     | 12:113348870 | 0.196   | 0.0107  | 8.68E-73  |
| OASL     | 12:121478277 | 0.074   | 0.00779 | 2.91E-21  |

|         |              |         |         |           |
|---------|--------------|---------|---------|-----------|
| OAT     | 10:126100850 | -0.107  | 0.00682 | 4.45E-54  |
| OAZ3    | 1:151741871  | 0.0207  | 0.003   | 5.30E-12  |
| OBFC1   | 10:105613417 | -0.0478 | 0.00539 | 1.12E-18  |
| OCEL1   | 19:17335485  | 0.0516  | 0.00605 | 2.08E-17  |
| OCLM    | 1:186381770  | -0.064  | 0.00719 | 7.54E-19  |
| ODF2L   | 1:86827633   | -0.0602 | 0.00443 | 2.59E-41  |
| OGFOD1  | 16:56491511  | -0.037  | 0.00398 | 2.23E-20  |
| OGFR    | 20:61443636  | 0.03    | 0.00346 | 5.42E-18  |
| OGFRL1  | 6:71952461   | 0.102   | 0.00631 | 8.80E-58  |
| OGG1    | 3:9823302    | 0.0167  | 0.00253 | 4.61E-11  |
| OGN     | 9:95096811   | -0.241  | 0.00527 | <1.0E-314 |
| OIP5    | 15:41590298  | 0.0577  | 0.00502 | 3.05E-30  |
| OLA1    | 2:175090564  | 0.0387  | 0.00473 | 3.84E-16  |
| OLFM4   | 13:53602462  | 0.232   | 0.01    | 3.38E-113 |
| OLFML1  | 11:7521640   | 0.0494  | 0.00547 | 2.09E-19  |
| OLIG1   | 21:34439206  | -0.0548 | 0.00411 | 7.27E-40  |
| OLIG2   | 21:34432792  | -0.0372 | 0.00534 | 3.43E-12  |
| OMD     | 9:95167578   | -0.351  | 0.00954 | 1.64E-264 |
| OPN3    | 1:241804070  | 0.0465  | 0.00475 | 1.70E-22  |
| OPRL1   | 20:62692060  | -0.0433 | 0.00552 | 5.39E-15  |
| OPTN    | 10:13142780  | -0.0936 | 0.0113  | 1.39E-16  |
| OR10AD1 | 12:48557922  | -0.151  | 0.00623 | 7.33E-123 |
| OR13D1  | 9:107457532  | -0.141  | 0.0113  | 4.60E-35  |
| OR1J1   | 9:125254013  | -0.0658 | 0.0063  | 3.08E-25  |
| OR1L8   | 9:125338710  | -0.0877 | 0.014   | 4.34E-10  |
| OR1N1   | 9:125254013  | -0.115  | 0.0145  | 2.75E-15  |
| OR1N2   | 9:125359393  | -0.084  | 0.00932 | 2.71E-19  |
| OR2AE1  | 7:99481416   | -0.129  | 0.00713 | 2.55E-71  |
| OR2AK2  | 1:248128929  | -0.204  | 0.00598 | 1.32E-230 |
| OR2B11  | 1:247614617  | -0.136  | 0.00614 | 1.76E-103 |
| OR2L2   | 1:248196602  | -0.266  | 0.0401  | 3.91E-11  |
| OR2L8   | 1:248112627  | 0.249   | 0.013   | 5.01E-79  |
| OR3A2   | 17:3203768   | -0.0387 | 0.00461 | 6.79E-17  |
| OR3A4P  | 17:3233600   | -0.0408 | 0.00627 | 8.36E-11  |
| OR4D1   | 17:56233639  | 0.115   | 0.0136  | 3.05E-17  |
| OR52B6  | 11:5641710   | -0.109  | 0.0074  | 2.77E-48  |
| OR52K1  | 11:4491786   | 0.0967  | 0.0107  | 1.67E-19  |
| OR52K2  | 11:4420543   | -0.0962 | 0.00649 | 1.10E-48  |
| OR52N4  | 11:5751392   | -0.282  | 0.0233  | 2.55E-33  |

|         |              |         |         |           |
|---------|--------------|---------|---------|-----------|
| OR52W1  | 11:6221214   | -0.112  | 0.00867 | 2.05E-37  |
| OR56B1  | 11:5761819   | -0.127  | 0.019   | 2.57E-11  |
| OR6K3   | 1:158717628  | 0.0488  | 0.00659 | 1.45E-13  |
| OR9A4   | 7:141639589  | -0.127  | 0.0211  | 1.70E-09  |
| ORAI2   | 7:102088338  | -0.132  | 0.0104  | 2.58E-36  |
| ORAOV1  | 11:69476293  | 0.0657  | 0.00437 | 5.68E-50  |
| ORC3    | 6:88286127   | 0.0627  | 0.00962 | 7.56E-11  |
| ORC4    | 2:148792900  | -0.0558 | 0.00765 | 3.71E-13  |
| ORM1    | 9:117078173  | 0.556   | 0.0164  | 9.37E-229 |
| ORM2    | 9:117078286  | -0.0998 | 0.00801 | 3.89E-35  |
| ORMDL1  | 2:190597241  | -0.0807 | 0.00423 | 2.31E-78  |
| ORMDL3  | 17:38029120  | 0.099   | 0.00473 | 1.46E-93  |
| OSBPL11 | 3:125313904  | -0.0346 | 0.00435 | 2.31E-15  |
| OSBPL1A | 18:21924107  | -0.039  | 0.00526 | 1.41E-13  |
| OSBPL2  | 20:60845695  | -0.0412 | 0.00357 | 1.91E-30  |
| OSBPL3  | 7:25068398   | 0.0366  | 0.00388 | 5.34E-21  |
| OSBPL5  | 11:3160207   | -0.019  | 0.00236 | 1.04E-15  |
| OSBPL6  | 2:179143827  | 0.0261  | 0.00303 | 9.11E-18  |
| OSBPL8  | 12:76981753  | -0.516  | 0.017   | 1.56E-187 |
| OSBPL9  | 1:52047439   | -0.0564 | 0.00707 | 1.78E-15  |
| OSCAR   | 19:54549026  | 0.0694  | 0.0047  | 2.76E-48  |
| OSCP1   | 1:36919898   | -0.0236 | 0.00394 | 2.05E-09  |
| OSGEP   | 14:20911822  | -0.0843 | 0.00419 | 4.58E-87  |
| OSGIN2  | 8:90989323   | -0.0413 | 0.00446 | 3.28E-20  |
| OSTF1   | 9:77756950   | -0.0466 | 0.00432 | 7.28E-27  |
| OTUB1   | 11:63710016  | 0.0912  | 0.0122  | 8.09E-14  |
| OTUD6B  | 8:92086692   | 0.0709  | 0.0042  | 2.10E-62  |
| OTX1    | 2:63263931   | -0.043  | 0.00347 | 8.19E-35  |
| OVCH1   | 12:29535715  | -0.0673 | 0.00567 | 4.11E-32  |
| OVGP1   | 1:111973893  | -0.0221 | 0.00317 | 3.21E-12  |
| OXA1L   | 14:23237835  | -0.0375 | 0.00452 | 1.28E-16  |
| OXCT1   | 5:41909115   | -0.0333 | 0.00452 | 2.20E-13  |
| OXNAD1  | 3:16303488   | -0.0532 | 0.00757 | 2.32E-12  |
| P2RX1   | 17:3797488   | 0.423   | 0.00906 | <1.0E-314 |
| P2RX4   | 12:121660302 | -0.0906 | 0.00566 | 2.84E-56  |
| P2RX5   | 17:3601495   | -0.0588 | 0.00933 | 3.04E-10  |
| P2RX7   | 12:121547431 | 0.148   | 0.0158  | 1.34E-20  |
| P2RY12  | 3:151051983  | -0.178  | 0.0103  | 1.20E-64  |
| P2RY13  | 3:151056598  | -0.0922 | 0.00748 | 2.00E-34  |

|          |              |         |         |           |
|----------|--------------|---------|---------|-----------|
| P2RY14   | 3:151010351  | 0.189   | 0.0126  | 2.43E-50  |
| P4HA1    | 10:74796759  | -0.11   | 0.00932 | 1.25E-31  |
| P4HA2    | 5:131578608  | 0.0647  | 0.0073  | 1.06E-18  |
| PAAF1    | 11:73611349  | 0.162   | 0.00854 | 1.27E-77  |
| PABPC4   | 1:40035928   | 0.03    | 0.00432 | 4.41E-12  |
| PABPN1   | 14:23797201  | -0.0599 | 0.00825 | 4.29E-13  |
| PACRGL   | 4:20714653   | 0.0525  | 0.00416 | 5.91E-36  |
| PACS1    | 11:65854561  | 0.0401  | 0.00365 | 8.76E-28  |
| PACSIN2  | 22:43343485  | -0.031  | 0.00438 | 1.63E-12  |
| PADI2    | 1:17397704   | 0.194   | 0.0047  | <1.0E-314 |
| PADI4    | 1:17619279   | 0.102   | 0.00581 | 2.98E-67  |
| PAFAH1B2 | 11:117008345 | 0.109   | 0.00812 | 9.56E-41  |
| PAFAH2   | 1:26330924   | 0.0333  | 0.00418 | 2.10E-15  |
| PAG1     | 8:82034453   | -0.128  | 0.00644 | 5.71E-85  |
| PAK1     | 11:77060092  | 0.0777  | 0.00907 | 1.32E-17  |
| PAK2     | 3:196496687  | -0.0269 | 0.00387 | 4.09E-12  |
| PALLD    | 4:169853125  | 0.0342  | 0.00311 | 8.85E-28  |
| PAM      | 5:102151674  | -0.379  | 0.00432 | <1.0E-314 |
| PAN2     | 12:56750872  | -0.0517 | 0.00739 | 3.03E-12  |
| PAN3     | 13:28771621  | -0.0503 | 0.00625 | 1.11E-15  |
| PANK1    | 10:91326997  | -0.0209 | 0.00282 | 1.64E-13  |
| PANK2    | 20:3873092   | 0.0522  | 0.00388 | 1.91E-40  |
| PANK3    | 5:168020360  | -0.0221 | 0.00345 | 1.66E-10  |
| PANX1    | 11:93862020  | 0.122   | 0.00447 | 1.12E-152 |
| PAPD5    | 16:50277613  | -0.039  | 0.00657 | 3.30E-09  |
| PAPD7    | 5:6710582    | 0.0677  | 0.0113  | 2.54E-09  |
| PAPOLA   | 14:97045171  | 0.043   | 0.00411 | 2.21E-25  |
| PAPSS1   | 4:108609143  | -0.361  | 0.00537 | <1.0E-314 |
| PAPSS2   | 10:89419143  | 0.0434  | 0.00431 | 1.27E-23  |
| PAQR6    | 1:156208230  | 0.122   | 0.00301 | <1.0E-314 |
| PAQR8    | 6:52198785   | 0.0593  | 0.00574 | 8.24E-25  |
| PARD3B   | 2:206246134  | -0.0254 | 0.00312 | 4.91E-16  |
| PARK7    | 1:8056453    | 0.0361  | 0.00346 | 3.44E-25  |
| PARL     | 3:183558402  | 0.0595  | 0.00399 | 3.40E-49  |
| PARP1    | 1:226609436  | -0.0473 | 0.00549 | 9.30E-18  |
| PARP11   | 12:3937663   | 0.05    | 0.00663 | 5.80E-14  |
| PARP14   | 3:122426474  | 0.153   | 0.0146  | 2.02E-25  |
| PARP15   | 3:122296834  | 0.121   | 0.00628 | 1.58E-79  |
| PARP16   | 15:65565632  | 0.0622  | 0.00365 | 2.54E-63  |

|         |              |         |         |           |
|---------|--------------|---------|---------|-----------|
| PARP2   | 14:20812467  | -0.0512 | 0.00491 | 3.28E-25  |
| PARP4   | 13:25049203  | 0.061   | 0.00475 | 3.68E-37  |
| PARP8   | 5:49956668   | 0.0794  | 0.00545 | 4.42E-47  |
| PARS2   | 1:55231955   | -0.0198 | 0.00307 | 1.26E-10  |
| PART1   | 5:59837767   | 0.0478  | 0.00793 | 1.81E-09  |
| PARVA   | 11:12388984  | 0.0288  | 0.00458 | 3.68E-10  |
| PARVB   | 22:44424191  | -0.0432 | 0.00418 | 1.05E-24  |
| PARVG   | 22:44637473  | 0.0507  | 0.00734 | 5.80E-12  |
| PASK    | 2:242044910  | 0.0968  | 0.00318 | 1.35E-187 |
| PATZ1   | 22:31750013  | 0.0269  | 0.00371 | 4.88E-13  |
| PAX8    | 2:113993385  | 0.0539  | 0.0023  | 2.21E-115 |
| PBLD    | 10:70042115  | 0.0443  | 0.00715 | 6.36E-10  |
| PBX1    | 1:164520400  | -0.0764 | 0.00948 | 9.44E-16  |
| PBX2    | 6:32153409   | -0.0682 | 0.00747 | 9.19E-20  |
| PBX3    | 9:128593132  | 0.0217  | 0.00367 | 3.56E-09  |
| PBXIP1  | 1:154888348  | -0.0199 | 0.00291 | 9.26E-12  |
| PCBP3   | 21:47309593  | -0.0302 | 0.0031  | 2.67E-22  |
| PCCA    | 13:101149072 | -0.0273 | 0.00404 | 1.54E-11  |
| PCCB    | 3:136056861  | -0.0292 | 0.0029  | 1.21E-23  |
| PCDH12  | 5:141328745  | 0.0263  | 0.0029  | 1.64E-19  |
| PCDH8   | 13:53409474  | -0.0287 | 0.00435 | 4.40E-11  |
| PCDH9   | 13:67787267  | 0.0365  | 0.00615 | 3.13E-09  |
| PCGF2   | 17:36904739  | -0.0343 | 0.00338 | 6.27E-24  |
| PCGF3   | 4:783314     | -0.111  | 0.00383 | 2.41E-171 |
| PCID2   | 13:113840822 | -0.0908 | 0.0113  | 1.33E-15  |
| PCK2    | 14:24525274  | -0.0262 | 0.0036  | 3.40E-13  |
| PCM1    | 8:17778924   | -0.0735 | 0.00425 | 4.00E-65  |
| PCMT1   | 6:150093682  | -0.0411 | 0.00417 | 1.05E-22  |
| PCMTD1  | 8:52732154   | 0.0492  | 0.00532 | 3.10E-20  |
| PCMTD2  | 20:62905851  | 0.143   | 0.00696 | 5.28E-90  |
| PCNA    | 20:5113847   | 0.0703  | 0.00898 | 5.95E-15  |
| PCNT    | 21:47793235  | -0.0387 | 0.00297 | 2.81E-38  |
| PCNX    | 14:71353205  | 0.0955  | 0.00589 | 1.02E-57  |
| PCNXL4  | 14:60641082  | -0.0544 | 0.00499 | 2.45E-27  |
| PCSK5   | 9:78487243   | -0.0354 | 0.00432 | 3.34E-16  |
| PCSK7   | 11:117096652 | -0.0348 | 0.00427 | 4.20E-16  |
| PCTP    | 17:53838522  | -0.0636 | 0.00814 | 6.43E-15  |
| PCYOX1L | 5:148764710  | -0.0569 | 0.00329 | 4.43E-65  |
| PCYT1A  | 3:195952900  | -0.0693 | 0.00408 | 4.47E-63  |

|          |              |         |         |           |
|----------|--------------|---------|---------|-----------|
| PDC      | 1:186407267  | -0.193  | 0.00896 | 1.60E-98  |
| PDCD1LG2 | 9:5466085    | -0.0762 | 0.00856 | 7.54E-19  |
| PDCD4    | 10:112658148 | 0.0585  | 0.0078  | 7.77E-14  |
| PDCD5    | 19:33074614  | -0.0417 | 0.005   | 9.92E-17  |
| PDCD6IP  | 3:33882134   | 0.056   | 0.00288 | 1.84E-81  |
| PDCD7    | 15:65411709  | -0.249  | 0.0229  | 2.70E-27  |
| PDE1B    | 12:54944618  | -0.0398 | 0.0043  | 2.81E-20  |
| PDE3B    | 11:14768384  | -0.0444 | 0.00436 | 4.11E-24  |
| PDE4B    | 1:66841180   | 0.0234  | 0.00392 | 2.60E-09  |
| PDE4D    | 5:59544653   | -0.072  | 0.00364 | 2.92E-84  |
| PDE6D    | 2:232617205  | 0.0475  | 0.005   | 2.89E-21  |
| PDE6H    | 12:15097497  | -0.0525 | 0.0082  | 1.62E-10  |
| PDE7A    | 8:66732061   | -0.0484 | 0.00543 | 6.21E-19  |
| PDE8A    | 15:85520329  | 0.0356  | 0.00507 | 2.46E-12  |
| PDE8B    | 5:76733379   | 0.0266  | 0.0027  | 1.14E-22  |
| PDE9A    | 21:44158405  | -0.0751 | 0.00311 | 2.25E-122 |
| PDGFC    | 4:157674780  | 0.0495  | 0.00518 | 1.69E-21  |
| PDGFD    | 11:104023820 | -0.0938 | 0.0144  | 8.66E-11  |
| PDHB     | 3:58375403   | 0.0358  | 0.00367 | 2.90E-22  |
| PDHX     | 11:34982148  | -0.0529 | 0.00426 | 8.41E-35  |
| PDIA5    | 3:122841062  | 0.0237  | 0.00341 | 4.33E-12  |
| PDIA6    | 2:10933249   | 0.0558  | 0.00373 | 1.66E-49  |
| PDK1     | 2:173371508  | 0.132   | 0.0071  | 3.79E-75  |
| PDK2     | 17:48158049  | -0.0612 | 0.00773 | 2.96E-15  |
| PDK4     | 7:95173570   | -0.0671 | 0.00718 | 1.31E-20  |
| PDLIM1   | 10:97037578  | -0.042  | 0.00698 | 1.83E-09  |
| PDLIM5   | 4:95568956   | -0.0265 | 0.00371 | 1.16E-12  |
| PDP1     | 8:94916102   | -0.0429 | 0.00435 | 1.00E-22  |
| PDPR     | 16:70117111  | 0.136   | 0.021   | 1.24E-10  |
| PDS5A    | 4:39820977   | 0.0277  | 0.00278 | 3.36E-23  |
| PDSS1    | 10:26983410  | -0.0544 | 0.00646 | 4.47E-17  |
| PDXK     | 21:45152500  | -0.0835 | 0.00389 | 6.37E-98  |
| PDZD8    | 10:119154977 | -0.154  | 0.00394 | 1.20E-293 |
| PDZK1IP1 | 1:47655816   | 0.494   | 0.0165  | 1.49E-181 |
| PEA15    | 1:160141286  | -0.0413 | 0.00638 | 1.04E-10  |
| PEBP1    | 12:118583232 | -0.149  | 0.00463 | 3.44E-208 |
| PECR     | 2:216887593  | 0.053   | 0.00502 | 7.90E-26  |
| PEG10    | 7:94253617   | 0.0253  | 0.0031  | 4.72E-16  |
| PELI1    | 2:64318988   | -0.11   | 0.0131  | 4.43E-17  |



|         |             |         |         |           |
|---------|-------------|---------|---------|-----------|
| PELI2   | 14:56585620 | 0.0233  | 0.00308 | 5.00E-14  |
| PELI3   | 11:66258006 | 0.016   | 0.00274 | 5.13E-09  |
| PER3    | 1:7897228   | -0.0629 | 0.0045  | 1.35E-43  |
| PERP    | 6:138412313 | 0.109   | 0.00754 | 1.22E-46  |
| PES1    | 22:30993934 | -0.027  | 0.00405 | 2.93E-11  |
| PEX1    | 7:92182429  | -0.064  | 0.0109  | 4.09E-09  |
| PEX14   | 1:10580275  | 0.0196  | 0.00257 | 2.40E-14  |
| PEX5    | 12:7329996  | -0.0337 | 0.00327 | 1.10E-24  |
| PEX6    | 6:42897074  | 0.122   | 0.00294 | <1.0E-314 |
| PEX7    | 6:137205972 | 0.0356  | 0.00539 | 4.39E-11  |
| PF4V1   | 4:74713950  | -1.08   | 0.0224  | <1.0E-314 |
| PFKFB2  | 1:207245080 | 0.0343  | 0.00563 | 1.18E-09  |
| PFKM    | 12:48582520 | -0.0231 | 0.00292 | 3.17E-15  |
| PFKP    | 10:3138996  | -0.0599 | 0.00366 | 1.13E-58  |
| PFN2    | 3:149692597 | 0.137   | 0.00622 | 2.92E-102 |
| PGAM2   | 7:44071980  | 0.073   | 0.012   | 1.42E-09  |
| PGAP1   | 2:197808980 | 0.0736  | 0.00968 | 3.36E-14  |
| PGAP2   | 11:3858616  | -0.0256 | 0.00361 | 1.57E-12  |
| PGAP3   | 17:37829571 | 0.0228  | 0.00325 | 2.38E-12  |
| PGBD4   | 15:34388399 | -0.0698 | 0.01    | 4.06E-12  |
| PGGT1B  | 5:114548071 | 0.256   | 0.0089  | 1.19E-168 |
| PGLYRP1 | 19:46520945 | 0.0592  | 0.0046  | 2.41E-37  |
| PGM1    | 1:64128758  | -0.0244 | 0.00313 | 6.79E-15  |
| PGM2    | 4:37846643  | -0.0573 | 0.00531 | 8.09E-27  |
| PGM2L1  | 11:74039452 | -0.0781 | 0.00681 | 4.07E-30  |
| PGM3    | 6:83828724  | 0.0581  | 0.00452 | 2.93E-37  |
| PGM5    | 9:71175565  | -0.24   | 0.00613 | 2.79E-294 |
| PGPEP1  | 19:18499238 | 0.0392  | 0.00526 | 1.08E-13  |
| PGS1    | 17:76383671 | 0.0498  | 0.00534 | 1.51E-20  |
| PHF10   | 6:170075364 | 0.0667  | 0.00626 | 3.04E-26  |
| PHF11   | 13:50105215 | -0.0982 | 0.00531 | 3.26E-74  |
| PHF17   | 4:129817261 | -0.0368 | 0.00357 | 1.32E-24  |
| PHF19   | 9:123605711 | -0.0292 | 0.00452 | 1.11E-10  |
| PHF20L1 | 8:133791175 | 0.0604  | 0.00316 | 5.00E-79  |
| PHF5A   | 22:41909618 | -0.0616 | 0.00552 | 1.23E-28  |
| PHGDH   | 1:120255370 | -0.035  | 0.0042  | 1.02E-16  |
| PHIP    | 6:79595097  | 0.0418  | 0.00337 | 9.41E-35  |
| PHKB    | 16:47526756 | 0.107   | 0.00957 | 1.07E-28  |
| PHLDB2  | 3:111617861 | -0.028  | 0.00456 | 9.33E-10  |

|          |             |         |         |           |
|----------|-------------|---------|---------|-----------|
| PHLPP1   | 18:60595572 | 0.0682  | 0.00376 | 3.47E-71  |
| PHOSPHO1 | 17:47349743 | -0.0619 | 0.00872 | 1.48E-12  |
| PHOSPHO2 | 2:170600408 | 0.0427  | 0.00661 | 1.14E-10  |
| PHTF2    | 7:77540136  | 0.0438  | 0.00715 | 9.62E-10  |
| PHYH     | 10:13363046 | 0.0325  | 0.0044  | 1.71E-13  |
| PI16     | 6:36915094  | -0.162  | 0.00656 | 3.30E-128 |
| PI3      | 20:43803708 | 0.403   | 0.0156  | 3.65E-138 |
| PI4K2A   | 10:99385842 | -0.0341 | 0.00577 | 3.83E-09  |
| PI4K2B   | 4:25251215  | -0.0562 | 0.00482 | 5.55E-31  |
| PIAS2    | 18:44494527 | -0.0776 | 0.00391 | 1.04E-84  |
| PIAS4    | 19:3989692  | -0.027  | 0.00409 | 4.46E-11  |
| PICALM   | 11:85690012 | -0.0505 | 0.00647 | 7.47E-15  |
| PICK1    | 22:38456680 | 0.0614  | 0.00418 | 6.35E-48  |
| PID1     | 2:230182148 | 0.197   | 0.0134  | 8.82E-48  |
| PIEZO1   | 16:88783449 | 0.0239  | 0.00276 | 5.44E-18  |
| PIGB     | 15:55570932 | -0.044  | 0.00575 | 2.52E-14  |
| PIGC     | 1:172425529 | 0.0713  | 0.00416 | 2.74E-64  |
| PIGF     | 2:46818992  | 0.0589  | 0.00765 | 1.66E-14  |
| PIGG     | 4:525060    | -0.0449 | 0.00397 | 2.76E-29  |
| PIGK     | 1:77731287  | 0.0349  | 0.00517 | 1.54E-11  |
| PIGM     | 1:159983400 | -0.158  | 0.012   | 1.08E-38  |
| PIGN     | 18:59814324 | -0.118  | 0.0045  | 5.36E-142 |
| PIGP     | 21:38452379 | 0.0608  | 0.00441 | 1.56E-42  |
| PIGU     | 20:33220196 | 0.0297  | 0.00427 | 4.38E-12  |
| PIGV     | 1:27172633  | 0.348   | 0.0272  | 4.48E-37  |
| PIGW     | 17:34843839 | 0.0708  | 0.00529 | 4.32E-40  |
| PIGX     | 3:196430450 | 0.159   | 0.011   | 1.09E-46  |
| PIGY     | 4:89417500  | -0.074  | 0.00722 | 1.81E-24  |
| PIH1D1   | 19:49960479 | -0.0826 | 0.00463 | 3.46E-69  |
| PIK3C2A  | 11:17115254 | -0.174  | 0.0066  | 8.52E-144 |
| PIK3C3   | 18:39530811 | 0.0558  | 0.00456 | 6.72E-34  |
| PIK3CA   | 3:178925321 | 0.038   | 0.00434 | 2.99E-18  |
| PIK3IP1  | 22:31659827 | 0.0441  | 0.00444 | 4.46E-23  |
| PIK3R3   | 1:46595868  | 0.232   | 0.00648 | 1.14E-251 |
| PILRB    | 7:99947657  | -0.152  | 0.00475 | 1.75E-204 |
| PIM1     | 6:37142422  | 0.0494  | 0.00682 | 4.76E-13  |
| PINK1    | 1:20949488  | 0.0572  | 0.00574 | 3.35E-23  |
| PINX1    | 8:10623884  | 0.0354  | 0.0056  | 2.77E-10  |
| PIP4K2A  | 10:22826093 | 0.0713  | 0.00723 | 1.01E-22  |

|         |              |         |         |           |
|---------|--------------|---------|---------|-----------|
| PIP4K2B | 17:36926731  | 0.0583  | 0.00335 | 7.39E-66  |
| PISD    | 22:31982241  | -0.125  | 0.00338 | 1.31E-264 |
| PITPNA  | 17:1464466   | -0.129  | 0.00667 | 3.71E-80  |
| PITPNB  | 22:28357674  | -0.0405 | 0.00658 | 8.36E-10  |
| PITPNC1 | 17:65381347  | -0.0493 | 0.00578 | 2.00E-17  |
| PITRM1  | 10:3215646   | -0.0574 | 0.00337 | 1.80E-63  |
| PIWIL4  | 11:94323376  | -0.0243 | 0.00348 | 3.20E-12  |
| PJA2    | 5:108752743  | 0.0743  | 0.00353 | 1.59E-94  |
| PKD1L1  | 7:48023705   | 0.0154  | 0.00154 | 2.35E-23  |
| PKD1L3  | 16:72051369  | -0.0172 | 0.00237 | 4.37E-13  |
| PKD2    | 4:88933519   | -0.305  | 0.0128  | 9.64E-119 |
| PKD2L1  | 10:102044312 | -0.0326 | 0.00543 | 1.95E-09  |
| PKD2L2  | 5:137244311  | -0.0157 | 0.00213 | 1.51E-13  |
| PKDREJ  | 22:46652372  | 0.0401  | 0.00408 | 1.36E-22  |
| PKHD1L1 | 8:110582366  | 0.0341  | 0.00521 | 6.69E-11  |
| PKIA    | 8:79482385   | 0.0579  | 0.00402 | 3.33E-46  |
| PKIB    | 6:123017838  | 0.0329  | 0.00429 | 1.86E-14  |
| PKNOX1  | 21:44473867  | 0.12    | 0.00526 | 9.45E-111 |
| PKP2    | 12:33057444  | -0.0252 | 0.0036  | 3.31E-12  |
| PKP4    | 2:159332885  | 0.0514  | 0.0045  | 7.67E-30  |
| PLA2G16 | 11:63385451  | 0.163   | 0.0127  | 2.67E-37  |
| PLA2G4A | 1:186947729  | -0.0522 | 0.00466 | 8.67E-29  |
| PLA2G4C | 19:48622545  | -0.131  | 0.00477 | 6.63E-156 |
| PLA2G7  | 6:46745076   | 0.495   | 0.0266  | 3.96E-75  |
| PLAC4   | 21:42521161  | 0.0695  | 0.00598 | 7.29E-31  |
| PLAGL1  | 6:144286687  | -0.384  | 0.0195  | 1.95E-83  |
| PLAUR   | 19:44151621  | 0.0375  | 0.00615 | 1.09E-09  |
| PLB1    | 2:28677086   | -0.53   | 0.00938 | <1.0E-314 |
| PLBD1   | 12:14742575  | -0.349  | 0.0437  | 1.80E-15  |
| PLCB1   | 20:8408544   | 0.145   | 0.00508 | 6.59E-167 |
| PLCB3   | 11:64044284  | 0.0146  | 0.00218 | 2.63E-11  |
| PLCG2   | 16:81964977  | 0.0382  | 0.00421 | 1.61E-19  |
| PLCL1   | 2:198882952  | 0.16    | 0.00562 | 1.54E-166 |
| PLCL2   | 3:16908186   | -0.0503 | 0.00584 | 9.81E-18  |
| PLD1    | 3:171546161  | -0.039  | 0.00511 | 2.72E-14  |
| PLD2    | 17:4721376   | -0.148  | 0.0096  | 2.68E-52  |
| PLD3    | 19:40851678  | 0.0187  | 0.00268 | 3.58E-12  |
| PLD6    | 17:17158343  | -0.088  | 0.00425 | 1.11E-91  |
| PLEC    | 8:145031968  | 0.028   | 0.00164 | 2.58E-63  |

|         |              |         |         |           |
|---------|--------------|---------|---------|-----------|
| PLEK    | 2:68637710   | 0.148   | 0.00453 | 2.39E-214 |
| PLEKHA1 | 10:124192430 | -0.0982 | 0.00492 | 1.49E-85  |
| PLEKHA3 | 2:179368982  | 0.0473  | 0.00568 | 9.95E-17  |
| PLEKHA5 | 12:19317082  | 0.102   | 0.00536 | 7.63E-78  |
| PLEKHA7 | 11:17025712  | -0.0162 | 0.00222 | 2.90E-13  |
| PLEKHF2 | 8:96209862   | -0.155  | 0.0137  | 1.98E-29  |
| PLEKHG2 | 19:39967355  | 0.0284  | 0.0033  | 1.07E-17  |
| PLEKHG6 | 12:6451590   | -0.0135 | 0.00186 | 4.56E-13  |
| PLEKHH2 | 2:43863274   | -0.0647 | 0.00228 | 4.14E-165 |
| PLEKHM1 | 17:43493834  | -0.0938 | 0.0068  | 1.56E-42  |
| PLEKHO2 | 15:65117709  | -0.0601 | 0.00331 | 2.42E-71  |
| PLGRKT  | 9:5383460    | -0.0514 | 0.00619 | 1.16E-16  |
| PLIN2   | 9:19127489   | -0.205  | 0.00593 | 1.61E-236 |
| PLIN3   | 19:4847874   | -0.0443 | 0.00605 | 2.93E-13  |
| PLK1    | 16:23697679  | -0.057  | 0.00453 | 1.06E-35  |
| PLK1S1  | 20:21142523  | -0.136  | 0.00443 | 3.99E-189 |
| PLN     | 6:118885950  | 0.15    | 0.00623 | 3.28E-122 |
| PLOD1   | 1:12048595   | -0.0929 | 0.003   | 6.29E-194 |
| PLRG1   | 4:155456390  | 0.0325  | 0.00377 | 8.38E-18  |
| PLS1    | 3:142396296  | -0.119  | 0.0164  | 5.79E-13  |
| PLSCR1  | 3:146250397  | 0.145   | 0.00922 | 8.44E-55  |
| PLSCR3  | 17:7301193   | 0.0373  | 0.00467 | 1.63E-15  |
| PLTP    | 20:44540178  | -0.0228 | 0.00252 | 2.07E-19  |
| PLVAP   | 19:17428176  | -0.0747 | 0.00999 | 9.09E-14  |
| PLXDC1  | 17:37248796  | 0.0606  | 0.00406 | 2.18E-49  |
| PLXDC2  | 10:20108228  | 0.0875  | 0.00578 | 9.89E-51  |
| PLXNA2  | 1:208408890  | 0.0178  | 0.00243 | 2.45E-13  |
| PLXNC1  | 12:94517858  | -0.0551 | 0.00714 | 1.50E-14  |
| PMF1    | 1:156206121  | 0.0189  | 0.00296 | 1.95E-10  |
| PMM2    | 16:8930666   | 0.0877  | 0.0061  | 4.29E-46  |
| PMP22   | 17:15147127  | -0.033  | 0.00558 | 3.41E-09  |
| PMS1    | 2:190620957  | -0.0704 | 0.00464 | 7.77E-51  |
| PMS2    | 7:6056901    | -0.113  | 0.00645 | 1.50E-66  |
| PNKD    | 2:219195799  | 0.0251  | 0.00313 | 1.32E-15  |
| PNKP    | 19:50368361  | -0.0184 | 0.00182 | 9.24E-24  |
| PNLDC1  | 6:160206106  | -0.0514 | 0.00647 | 2.50E-15  |
| PNNMAL1 | 19:46974752  | -0.0359 | 0.00523 | 7.84E-12  |
| PNN     | 14:39651193  | -0.0248 | 0.00404 | 8.76E-10  |
| PNP     | 14:20940626  | 0.0815  | 0.00904 | 2.49E-19  |

|         |              |         |         |           |
|---------|--------------|---------|---------|-----------|
| PNPLA1  | 6:36258667   | 0.0317  | 0.004   | 3.23E-15  |
| PNPLA8  | 7:108101701  | -0.167  | 0.0154  | 4.41E-27  |
| PNRC1   | 6:89783713   | -0.0334 | 0.00332 | 1.36E-23  |
| POC1B   | 12:89907010  | 0.205   | 0.00701 | 6.31E-174 |
| POC5    | 5:74998892   | -0.091  | 0.00478 | 4.83E-78  |
| POFUT2  | 21:46655385  | -0.0585 | 0.00625 | 1.08E-20  |
| POGLUT1 | 3:119143383  | -0.142  | 0.00747 | 5.32E-78  |
| POGZ    | 1:151414924  | -0.0611 | 0.00776 | 4.08E-15  |
| POLDIP3 | 22:42982275  | -0.0583 | 0.00825 | 1.71E-12  |
| POLE2   | 14:50133218  | 0.0626  | 0.00837 | 8.53E-14  |
| POLE4   | 2:75185856   | -0.0736 | 0.00526 | 1.36E-43  |
| POLI    | 18:51779019  | -0.174  | 0.00405 | <1.0E-314 |
| POLM    | 7:44111258   | 0.0322  | 0.00329 | 1.87E-22  |
| POLN    | 4:2223070    | -0.0446 | 0.00561 | 2.29E-15  |
| POLR1A  | 2:86332656   | 0.0556  | 0.00353 | 8.72E-55  |
| POLR1B  | 2:113300283  | -0.129  | 0.00635 | 3.18E-88  |
| POLR1D  | 13:28172776  | 0.212   | 0.00688 | 2.01E-191 |
| POLR1E  | 9:37490307   | 0.13    | 0.00593 | 4.36E-102 |
| POLR2B  | 4:57895214   | -0.0293 | 0.00294 | 2.79E-23  |
| POLR2C  | 16:57515188  | -0.0276 | 0.0038  | 4.57E-13  |
| POLR2D  | 2:128615390  | 0.024   | 0.00389 | 7.10E-10  |
| POLR2J  | 7:102085206  | 0.343   | 0.0161  | 7.73E-97  |
| POLR2L  | 11:837661    | -0.431  | 0.0201  | 5.12E-98  |
| POLR3B  | 12:106729425 | -0.0961 | 0.0104  | 3.00E-20  |
| POLR3E  | 16:22345191  | -0.0206 | 0.00298 | 4.77E-12  |
| POLR3F  | 20:18464673  | -0.046  | 0.0054  | 2.14E-17  |
| POLR3K  | 16:136142    | 0.131   | 0.0104  | 7.58E-36  |
| POM121  | 7:72300332   | -0.364  | 0.0291  | 2.82E-35  |
| POMT1   | 9:134389070  | -0.0372 | 0.00413 | 3.05E-19  |
| POMT2   | 14:77754530  | -0.0285 | 0.00468 | 1.16E-09  |
| PON2    | 7:95063702   | -0.0577 | 0.0053  | 2.48E-27  |
| POP5    | 12:120994872 | -0.0931 | 0.00579 | 6.31E-57  |
| POPDC2  | 3:119375441  | 0.083   | 0.00393 | 3.82E-95  |
| POR     | 7:75664921   | -0.03   | 0.00335 | 5.30E-19  |
| PP2D1   | 3:20021515   | 0.0792  | 0.00827 | 1.58E-21  |
| PP7080  | 5:466458     | 0.0651  | 0.0077  | 3.79E-17  |
| PPA1    | 10:72002499  | -0.136  | 0.00652 | 1.15E-92  |
| PPA2    | 4:106325900  | -0.0526 | 0.00288 | 3.57E-72  |
| PPAPDC2 | 9:4670187    | -0.0855 | 0.00596 | 9.90E-46  |

|          |              |         |         |           |
|----------|--------------|---------|---------|-----------|
| PPARG    | 3:12511376   | -0.0218 | 0.00291 | 8.56E-14  |
| PPARGC1A | 4:23868647   | -0.116  | 0.00498 | 6.75E-115 |
| PPAT     | 4:57230687   | 0.0817  | 0.00494 | 7.29E-60  |
| PPCS     | 1:42910624   | 0.0441  | 0.00436 | 8.60E-24  |
| PPDPF    | 20:62162917  | 0.113   | 0.0159  | 1.13E-12  |
| PPFIA1   | 11:70238030  | 0.0589  | 0.00384 | 4.04E-52  |
| PPFIBP2  | 11:7548423   | 0.107   | 0.00469 | 1.81E-110 |
| PPHLN1   | 12:42854205  | -0.0355 | 0.00306 | 9.84E-31  |
| PPIA     | 7:44836314   | -0.0619 | 0.00744 | 1.14E-16  |
| PPIE     | 1:40200894   | -0.314  | 0.00692 | <1.0E-314 |
| PPIF     | 10:81103247  | -0.0595 | 0.00351 | 9.48E-63  |
| PPIG     | 2:170457451  | 0.0517  | 0.00431 | 1.08E-32  |
| PPIH     | 1:43111741   | 0.0559  | 0.00686 | 4.75E-16  |
| PPIL2    | 22:22049783  | -0.0263 | 0.00275 | 1.67E-21  |
| PPIL3    | 2:201730687  | 0.28    | 0.0067  | <1.0E-314 |
| PPIL4    | 6:149811693  | 0.0925  | 0.00405 | 4.80E-110 |
| PPIP5K2  | 5:102415468  | 0.206   | 0.00428 | <1.0E-314 |
| PPL      | 16:4949815   | -0.0386 | 0.00231 | 2.12E-61  |
| PPM1F    | 22:22301254  | 0.0742  | 0.00371 | 9.27E-86  |
| PPM1K    | 4:89150178   | -0.0486 | 0.00693 | 2.48E-12  |
| PPM1L    | 3:160512511  | 0.0942  | 0.0134  | 2.59E-12  |
| PPM1M    | 3:52287468   | -0.0216 | 0.00332 | 8.90E-11  |
| PPM1N    | 19:46006212  | 0.0349  | 0.00585 | 2.66E-09  |
| PPP1CC   | 12:111187119 | 0.14    | 0.0155  | 2.72E-19  |
| PPP1R11  | 6:29986684   | -0.0659 | 0.00594 | 2.94E-28  |
| PPP1R14A | 19:38741577  | -0.0949 | 0.0123  | 1.13E-14  |
| PPP1R15A | 19:49378328  | 0.0621  | 0.00652 | 2.56E-21  |
| PPP1R17  | 7:31728180   | 0.038   | 0.00446 | 2.23E-17  |
| PPP1R2   | 3:195284917  | -0.381  | 0.0149  | 3.01E-136 |
| PPP1R21  | 2:48682513   | 0.0405  | 0.00471 | 1.06E-17  |
| PPP1R3B  | 8:8969374    | -0.0506 | 0.00606 | 8.89E-17  |
| PPP1R7   | 2:242120608  | -0.0648 | 0.00471 | 2.41E-42  |
| PPP2CB   | 8:30649380   | -0.273  | 0.0115  | 1.50E-117 |
| PPP2R1B  | 11:111621399 | 0.0579  | 0.0031  | 1.94E-75  |
| PPP2R2D  | 10:133766943 | 0.0279  | 0.00467 | 2.56E-09  |
| PPP2R3A  | 3:135800693  | -0.0192 | 0.00284 | 1.34E-11  |
| PPP2R3C  | 14:35625217  | 0.194   | 0.00534 | 3.39E-259 |
| PPP2R4   | 9:131884041  | 0.07    | 0.00434 | 4.37E-57  |
| PPP2R5A  | 1:212440206  | -0.21   | 0.00524 | 2.02E-306 |

|          |              |         |         |           |
|----------|--------------|---------|---------|-----------|
| PPP2R5C  | 14:102369553 | -0.0302 | 0.00411 | 2.63E-13  |
| PPP3CA   | 4:102268940  | 0.0286  | 0.00358 | 1.55E-15  |
| PPP4R1   | 18:9626179   | 0.0733  | 0.00507 | 1.61E-46  |
| PPP4R4   | 14:94616008  | -0.0801 | 0.00299 | 1.84E-148 |
| PPP5C    | 19:46860562  | 0.0914  | 0.0031  | 6.49E-177 |
| PPP6C    | 9:127952746  | 0.0312  | 0.00304 | 1.49E-24  |
| PPT1     | 1:40559052   | 0.434   | 0.00862 | <1.0E-314 |
| PPT2     | 6:32113571   | -0.0182 | 0.00274 | 3.44E-11  |
| PPTC7    | 12:110996263 | 0.04    | 0.00578 | 5.02E-12  |
| PPWD1    | 5:64828559   | -0.068  | 0.00383 | 1.04E-68  |
| PQLC1    | 18:77711157  | 0.0355  | 0.00424 | 7.34E-17  |
| PQLC3    | 2:11325331   | -0.0457 | 0.00392 | 3.87E-31  |
| PRAM1    | 19:8540159   | 0.0351  | 0.00413 | 2.21E-17  |
| PRC1     | 15:91525197  | 0.0625  | 0.00631 | 6.59E-23  |
| PRDM15   | 21:43220036  | -0.0345 | 0.00343 | 1.47E-23  |
| PRDM4    | 12:108082066 | -0.0587 | 0.0038  | 1.19E-52  |
| PRDM5    | 4:121693006  | 0.207   | 0.00604 | 1.52E-231 |
| PRDM8    | 4:81132765   | -0.0344 | 0.00313 | 7.29E-28  |
| PRDX1    | 1:45987574   | 0.0592  | 0.00767 | 1.44E-14  |
| PRDX3    | 10:120952037 | -0.0512 | 0.00456 | 6.32E-29  |
| PRDX5    | 11:64082807  | -0.25   | 0.00694 | 4.48E-254 |
| PRDX6    | 1:173484385  | -0.301  | 0.00916 | 2.25E-215 |
| PRELID2  | 5:145210955  | -0.0467 | 0.00784 | 2.80E-09  |
| PREP     | 6:105776312  | 0.0231  | 0.00391 | 3.65E-09  |
| PREX1    | 20:47373809  | 0.0724  | 0.0047  | 1.94E-52  |
| PRG4     | 1:186291941  | 0.0409  | 0.00538 | 3.55E-14  |
| PRH1     | 12:11072615  | -0.258  | 0.0115  | 3.42E-106 |
| PRH2     | 12:11131212  | 0.224   | 0.0116  | 7.67E-80  |
| PRICKLE1 | 12:43002908  | 0.0681  | 0.0111  | 1.02E-09  |
| PRICKLE4 | 6:41782107   | -0.0269 | 0.00325 | 1.49E-16  |
| PRIM1    | 12:57144533  | -0.122  | 0.00476 | 1.10E-136 |
| PRKAB1   | 12:120146925 | -0.0684 | 0.0064  | 2.29E-26  |
| PRKAB2   | 1:146632970  | -0.0673 | 0.00426 | 7.40E-55  |
| PRKAG2   | 7:151250455  | -0.0361 | 0.00366 | 1.00E-22  |
| PRKAG3   | 2:219666228  | -0.0143 | 0.00224 | 1.89E-10  |
| PRKAR2B  | 7:106655758  | 0.112   | 0.0178  | 4.02E-10  |
| PRKCA    | 17:64283468  | 0.0346  | 0.00551 | 3.52E-10  |
| PRKCB    | 16:23865170  | 0.0898  | 0.00331 | 9.36E-152 |
| PRKCD    | 3:53205494   | -0.0373 | 0.00506 | 1.93E-13  |

|              |             |         |         |           |
|--------------|-------------|---------|---------|-----------|
| PRKCDBP      | 11:6343486  | -0.0291 | 0.00492 | 3.26E-09  |
| PRKCE        | 2:45886261  | -0.0212 | 0.0036  | 4.09E-09  |
| PRKD1        | 14:30314078 | -0.0339 | 0.00289 | 1.96E-31  |
| PRKD2        | 19:47205707 | -0.0611 | 0.00365 | 3.00E-61  |
| PRKD3        | 2:37479959  | -0.0758 | 0.00378 | 1.92E-86  |
| PRKG1        | 10:53673125 | 0.0445  | 0.00438 | 4.27E-24  |
| PRKG2        | 4:82082419  | 0.0984  | 0.00446 | 3.26E-103 |
| PRKRA        | 2:179340710 | -0.0793 | 0.0109  | 4.32E-13  |
| PRKRIP1      | 7:102086396 | 0.145   | 0.0144  | 1.49E-23  |
| PRMT2        | 21:48039367 | -0.0903 | 0.00411 | 1.67E-102 |
| PRMT5        | 14:23422186 | 0.166   | 0.00465 | 1.46E-250 |
| PRMT6        | 1:107596443 | 0.0598  | 0.00509 | 1.77E-31  |
| PROCA1       | 17:27053176 | 0.0282  | 0.00473 | 2.55E-09  |
| PROK2        | 3:71854587  | 0.128   | 0.00943 | 4.63E-41  |
| PROS1        | 3:93639320  | 0.135   | 0.012   | 5.14E-29  |
| PRPF18       | 10:13653653 | 0.0846  | 0.00403 | 3.19E-94  |
| PRPF19       | 11:60633250 | 0.0186  | 0.0029  | 1.76E-10  |
| PRPF6        | 20:62667554 | -0.0675 | 0.00636 | 5.40E-26  |
| PRPF8        | 17:1574532  | 0.0327  | 0.00522 | 3.99E-10  |
| PRPSAP1      | 17:74293388 | -0.056  | 0.00401 | 1.68E-43  |
| PRPSAP2      | 17:18783052 | 0.0666  | 0.00442 | 2.89E-50  |
| PRR13        | 12:53815974 | -0.0858 | 0.00935 | 6.31E-20  |
| PRR4         | 12:11051749 | -0.0612 | 0.00546 | 7.02E-29  |
| PRR5-ARHGAP8 | 22:45262790 | 0.0198  | 0.00291 | 1.23E-11  |
| PRR5L        | 11:36432830 | 0.101   | 0.0151  | 2.61E-11  |
| PRRC2A       | 6:31591918  | -0.0384 | 0.0023  | 7.54E-61  |
| PRRC2B       | 9:134346315 | -0.0553 | 0.00899 | 8.19E-10  |
| PRRG4        | 11:32891548 | -0.134  | 0.00763 | 1.86E-67  |
| PRSS21       | 16:2872116  | 0.0457  | 0.00732 | 4.61E-10  |
| PRSS30P      | 16:2911320  | 0.0525  | 0.00406 | 1.37E-37  |
| PRUNE        | 1:151006539 | -0.0515 | 0.00669 | 1.53E-14  |
| PRUNE2       | 9:79304020  | -0.299  | 0.00548 | <1.0E-314 |
| PSAP         | 10:73555926 | -0.0349 | 0.00333 | 2.09E-25  |
| PSAT1        | 9:80966916  | -0.0722 | 0.0101  | 8.43E-13  |
| PSD4         | 2:113943470 | 0.0694  | 0.00284 | 1.35E-124 |
| PSEN1        | 14:73662629 | 0.0759  | 0.00392 | 1.28E-80  |
| PSEN2        | 1:227042462 | -0.0198 | 0.00282 | 2.77E-12  |
| PSIP1        | 9:15441648  | 0.0289  | 0.00474 | 1.18E-09  |
| PSMA2        | 7:42975857  | -0.0585 | 0.00758 | 1.48E-14  |



|         |             |         |         |           |
|---------|-------------|---------|---------|-----------|
| PSMA4   | 15:78814681 | 0.101   | 0.00594 | 1.35E-62  |
| PSMB10  | 16:67936975 | 0.065   | 0.00709 | 6.42E-20  |
| PSMB3   | 17:36927055 | -0.0828 | 0.00791 | 2.11E-25  |
| PSMB4   | 1:151406375 | 0.0778  | 0.00504 | 1.68E-52  |
| PSMB7   | 9:127163623 | -0.0312 | 0.00357 | 2.75E-18  |
| PSMB8   | 6:32811645  | -0.0706 | 0.0114  | 5.59E-10  |
| PSMB9   | 6:32830013  | -0.0519 | 0.00463 | 7.74E-29  |
| PSMC3IP | 17:40686342 | -0.0268 | 0.00407 | 4.59E-11  |
| PSMC4   | 19:40486606 | 0.0791  | 0.0106  | 1.23E-13  |
| PSMC5   | 17:61948203 | -0.025  | 0.00422 | 3.06E-09  |
| PSMD12  | 17:65332728 | 0.0472  | 0.00429 | 8.13E-28  |
| PSMD13  | 11:202072   | -0.144  | 0.00341 | <1.0E-314 |
| PSMD2   | 3:184011515 | -0.0316 | 0.00495 | 1.82E-10  |
| PSMD3   | 17:38144241 | -0.0197 | 0.00282 | 3.08E-12  |
| PSMD5   | 9:123610288 | 0.0516  | 0.00395 | 1.73E-38  |
| PSME2   | 14:24604399 | 0.0775  | 0.0119  | 8.63E-11  |
| PSME4   | 2:54198181  | 0.0663  | 0.00829 | 1.55E-15  |
| PSMF1   | 20:1130627  | 0.102   | 0.0155  | 5.38E-11  |
| PSMG1   | 21:40536790 | 0.116   | 0.00447 | 1.08E-139 |
| PSMG2   | 18:12672008 | 0.0478  | 0.00317 | 3.25E-50  |
| PSPC1   | 13:20352275 | 0.0621  | 0.00349 | 1.34E-68  |
| PSRC1   | 1:109817590 | -0.0179 | 0.00293 | 9.72E-10  |
| PSTPIP2 | 18:43569556 | -0.174  | 0.0104  | 5.48E-61  |
| PTBP2   | 1:97266007  | 0.0568  | 0.00383 | 7.71E-49  |
| PTBP3   | 9:115008349 | 0.0321  | 0.00357 | 3.47E-19  |
| PTER    | 10:16482481 | 0.0632  | 0.00384 | 2.28E-59  |
| PTGDR   | 14:52687634 | -0.0686 | 0.00843 | 5.24E-16  |
| PTGER2  | 14:52781195 | 0.0501  | 0.00693 | 5.59E-13  |
| PTGES   | 9:132542547 | -0.107  | 0.00984 | 3.41E-27  |
| PTGFR   | 1:79002544  | 0.0366  | 0.00539 | 1.25E-11  |
| PTGIR   | 19:47123402 | 0.0306  | 0.00496 | 7.20E-10  |
| PTGR1   | 9:114376753 | 0.0285  | 0.0044  | 9.57E-11  |
| PTGR2   | 14:74318714 | -0.256  | 0.0102  | 1.71E-131 |
| PTK2B   | 8:27195121  | -0.0677 | 0.00311 | 1.48E-100 |
| PTP4A1  | 6:64241021  | 0.0612  | 0.0102  | 2.34E-09  |
| PTP4A2  | 1:32410737  | -0.0661 | 0.00761 | 4.99E-18  |
| PTPLA   | 10:17707993 | -0.0421 | 0.00431 | 2.29E-22  |
| PTPN12  | 7:77300726  | 0.0815  | 0.00428 | 4.33E-78  |
| PTPN18  | 2:131112343 | 0.0789  | 0.00658 | 1.07E-32  |

|         |              |         |         |           |
|---------|--------------|---------|---------|-----------|
| PTPN2   | 18:12857002  | 0.02    | 0.00338 | 3.81E-09  |
| PTPN22  | 1:114425590  | -0.0668 | 0.00408 | 8.84E-59  |
| PTPN7   | 1:202171923  | 0.0434  | 0.00485 | 4.81E-19  |
| PTPRB   | 12:70889323  | 0.0253  | 0.00392 | 1.26E-10  |
| PTPRE   | 10:129845903 | 0.0705  | 0.0037  | 2.77E-78  |
| PTPRJ   | 11:48013484  | -0.0996 | 0.00512 | 1.70E-81  |
| PTPRM   | 18:8019465   | 0.144   | 0.00688 | 2.70E-93  |
| PTPRN2  | 7:157289684  | -0.0777 | 0.0052  | 2.33E-49  |
| PTPRS   | 19:5207292   | -0.0223 | 0.0035  | 2.18E-10  |
| PTTG1IP | 21:46294986  | -0.0266 | 0.0032  | 1.18E-16  |
| PTTG2   | 4:37962186   | -0.299  | 0.0102  | 2.72E-176 |
| PTTG3P  | 8:67670011   | 0.273   | 0.0306  | 6.88E-19  |
| PUM1    | 1:31577776   | -0.0268 | 0.00404 | 3.61E-11  |
| PUM2    | 2:20532201   | 0.0712  | 0.00561 | 1.89E-36  |
| PUS10   | 2:61244410   | -0.0965 | 0.00553 | 3.00E-66  |
| PUS3    | 11:125776259 | -0.068  | 0.00814 | 8.66E-17  |
| PUS7    | 7:105162293  | -0.12   | 0.00826 | 1.12E-46  |
| PUS7L   | 12:44082341  | 0.0331  | 0.00461 | 8.58E-13  |
| PVALB   | 22:37249491  | -0.252  | 0.0157  | 1.47E-56  |
| PVR     | 19:45122146  | 0.0349  | 0.00424 | 2.36E-16  |
| PVRIG   | 7:99804125   | -0.147  | 0.00748 | 5.69E-83  |
| PVRL2   | 19:45371188  | -0.667  | 0.0155  | <1.0E-314 |
| PWP1    | 12:108075138 | -0.0816 | 0.00491 | 1.97E-60  |
| PWP2    | 21:45490684  | 0.0443  | 0.00282 | 2.14E-54  |
| PXDC1   | 6:3715608    | -0.066  | 0.0101  | 5.80E-11  |
| PXK     | 3:58411088   | 0.0979  | 0.00519 | 1.09E-76  |
| PYGB    | 20:25241345  | 0.0436  | 0.00267 | 1.46E-58  |
| PYGL    | 14:51389918  | -0.0436 | 0.00644 | 1.37E-11  |
| PYHIN1  | 1:158910194  | 0.0524  | 0.0073  | 7.92E-13  |
| PYROXD2 | 10:100144007 | -0.0315 | 0.00249 | 3.73E-36  |
| PZP     | 12:9258821   | 0.226   | 0.00866 | 8.43E-141 |
| QDPR    | 4:17518920   | 0.174   | 0.00488 | 1.97E-249 |
| QKI     | 6:163894045  | 0.219   | 0.00701 | 1.77E-197 |
| QRICH1  | 3:49106536   | 0.0431  | 0.00575 | 8.05E-14  |
| QRSL1   | 6:107077502  | 0.034   | 0.00531 | 1.62E-10  |
| QSER1   | 11:32911368  | -0.154  | 0.0129  | 2.77E-32  |
| QSOX1   | 1:180140101  | -0.0578 | 0.00289 | 1.13E-85  |
| QTRTD1  | 3:113785149  | -0.0539 | 0.00523 | 1.03E-24  |
| R3HCC1L | 10:99955345  | 0.027   | 0.00368 | 2.62E-13  |

|           |              |         |         |           |
|-----------|--------------|---------|---------|-----------|
| R3HDM1    | 2:136288273  | -0.0316 | 0.0041  | 1.39E-14  |
| RAB11FIP3 | 16:518074    | -0.0249 | 0.00281 | 1.03E-18  |
| RAB11FIP4 | 17:29821612  | 0.215   | 0.00995 | 2.96E-99  |
| RAB14     | 9:123961418  | 0.0324  | 0.00345 | 8.79E-21  |
| RAB15     | 14:65449458  | -0.0875 | 0.0115  | 3.58E-14  |
| RAB18     | 10:27851166  | 0.0404  | 0.005   | 7.60E-16  |
| RAB1B     | 11:66040049  | -0.0271 | 0.00363 | 1.03E-13  |
| RAB20     | 13:111175244 | -0.075  | 0.00398 | 6.66E-77  |
| RAB23     | 6:57069606   | -0.145  | 0.00835 | 2.03E-65  |
| RAB27A    | 15:55502516  | 0.0467  | 0.00476 | 1.58E-22  |
| RAB2A     | 8:61525780   | -0.0437 | 0.00442 | 7.85E-23  |
| RAB2B     | 14:21927638  | 0.111   | 0.012   | 4.28E-20  |
| RAB31     | 18:9850581   | -0.0513 | 0.00472 | 3.11E-27  |
| RAB34     | 17:27054641  | 0.0467  | 0.00656 | 1.23E-12  |
| RAB38     | 11:87931463  | -0.438  | 0.0207  | 2.72E-95  |
| RAB3GAP2  | 1:220409506  | 0.0544  | 0.00467 | 4.56E-31  |
| RAB3IP    | 12:70145471  | -0.262  | 0.0183  | 9.72E-46  |
| RAB44     | 6:36698294   | 0.0567  | 0.00387 | 1.57E-47  |
| RAB5A     | 3:20045701   | -0.0823 | 0.00393 | 1.07E-93  |
| RAB5C     | 17:40297658  | 0.0325  | 0.00443 | 2.54E-13  |
| RAB6B     | 3:133602195  | 0.0205  | 0.00321 | 1.95E-10  |
| RAB7L1    | 1:205757798  | -0.045  | 0.00443 | 4.89E-24  |
| RAB8A     | 19:16223287  | 0.0662  | 0.00471 | 4.93E-44  |
| RABAC1    | 19:42441795  | -0.0855 | 0.00553 | 7.52E-53  |
| RABEP1    | 17:5302203   | 0.0354  | 0.00343 | 8.74E-25  |
| RABEPK    | 9:127914865  | 0.0501  | 0.00326 | 2.60E-52  |
| RABGAP1   | 9:125851363  | -0.036  | 0.00426 | 4.05E-17  |
| RABGAP1L  | 1:174086292  | 0.0291  | 0.00314 | 2.66E-20  |
| RABGGTA   | 14:24733689  | 0.0315  | 0.00343 | 5.67E-20  |
| RAC1      | 7:6416360    | -0.247  | 0.00641 | 7.95E-286 |
| RAC2      | 22:37619290  | 0.0357  | 0.0039  | 6.56E-20  |
| RAD17     | 5:68733107   | 0.054   | 0.00755 | 9.77E-13  |
| RAD18     | 3:9005078    | -0.0478 | 0.00366 | 1.57E-38  |
| RAD23B    | 9:110094733  | 0.059   | 0.00417 | 1.39E-44  |
| RAD51AP1  | 12:4665500   | -0.185  | 0.0289  | 1.60E-10  |
| RAD51C    | 17:56725052  | -0.302  | 0.0053  | <1.0E-314 |
| RAD51D    | 17:33493071  | -0.0216 | 0.00348 | 5.35E-10  |
| RAD52     | 12:1058738   | 0.0967  | 0.00599 | 2.97E-57  |
| RAD54B    | 8:95440423   | -0.101  | 0.00359 | 3.94E-161 |

|            |              |         |         |           |
|------------|--------------|---------|---------|-----------|
| RAE1       | 20:55953682  | -0.0231 | 0.00388 | 2.79E-09  |
| RAF1       | 3:12690343   | -0.0279 | 0.00412 | 1.33E-11  |
| RALA       | 7:39706470   | -0.054  | 0.00323 | 4.99E-61  |
| RALB       | 2:121003612  | 0.119   | 0.00636 | 1.10E-75  |
| RALBP1     | 18:9488704   | -0.0782 | 0.00442 | 4.27E-68  |
| RALGAPA1   | 14:36132999  | -0.0962 | 0.0104  | 3.40E-20  |
| RALGDS     | 9:135966340  | -0.082  | 0.00814 | 1.18E-23  |
| RALGPS1    | 9:129672061  | -0.0481 | 0.00305 | 9.66E-55  |
| RAMP3      | 7:45257184   | -0.0469 | 0.00635 | 1.85E-13  |
| RAN        | 12:131364071 | 0.0237  | 0.00344 | 5.81E-12  |
| RANBP17    | 5:170382559  | 0.0497  | 0.00349 | 3.30E-45  |
| RAP1A      | 1:112184499  | 0.0256  | 0.00371 | 5.75E-12  |
| RAP1GAP    | 1:22023238   | 0.178   | 0.00597 | 1.05E-179 |
| RAP2A      | 13:98115192  | -0.0678 | 0.0061  | 2.24E-28  |
| RAPGEF1    | 9:134565964  | 0.107   | 0.003   | 1.27E-250 |
| RAPGEF3    | 12:48078806  | -0.0354 | 0.00348 | 4.40E-24  |
| RAPGEFL1   | 17:38374131  | -0.284  | 0.0163  | 1.14E-65  |
| RARB       | 3:25635743   | -0.0193 | 0.00313 | 7.74E-10  |
| RARRES1    | 3:158405899  | -0.0448 | 0.00362 | 8.54E-35  |
| RARS       | 5:167950108  | -0.101  | 0.00443 | 2.41E-110 |
| RARS2      | 6:88225863   | -0.039  | 0.00301 | 1.12E-37  |
| RASGRF2    | 5:80289783   | -0.0522 | 0.005   | 3.04E-25  |
| RASGRP3    | 2:33702902   | 0.141   | 0.0127  | 1.75E-28  |
| RASSF2     | 20:4797284   | -0.0377 | 0.00401 | 7.86E-21  |
| RASSF3     | 12:65035405  | -0.0621 | 0.00514 | 3.57E-33  |
| RASSF4     | 10:45432352  | 0.0741  | 0.00671 | 4.92E-28  |
| RASSF5     | 1:206729593  | -0.0279 | 0.00324 | 9.46E-18  |
| RASSF6     | 4:74406101   | -0.0573 | 0.00863 | 3.39E-11  |
| RAVER2     | 1:65301611   | -0.0355 | 0.00426 | 1.16E-16  |
| RB1        | 13:48897520  | 0.0298  | 0.00375 | 2.01E-15  |
| RB1CC1     | 8:53582514   | 0.0327  | 0.00493 | 3.65E-11  |
| RBAK       | 7:5154778    | -0.0831 | 0.00839 | 5.86E-23  |
| RBBP5      | 1:205050775  | -0.029  | 0.00473 | 9.65E-10  |
| RBBP8      | 18:20516135  | -0.116  | 0.00968 | 1.76E-32  |
| RBCK1      | 20:392262    | -0.0333 | 0.00508 | 5.60E-11  |
| RBFOX2     | 22:36335309  | 0.0478  | 0.0047  | 4.61E-24  |
| RBL2       | 16:53428284  | 0.145   | 0.00338 | <1.0E-314 |
| RBM11      | 21:15613808  | -0.0639 | 0.00625 | 2.35E-24  |
| RBM12B-AS1 | 8:94754865   | -0.0579 | 0.00711 | 5.15E-16  |

|        |              |         |         |           |
|--------|--------------|---------|---------|-----------|
| RBM14  | 11:66401373  | 0.0735  | 0.00736 | 2.57E-23  |
| RBM15  | 1:110888948  | 0.11    | 0.00532 | 7.08E-92  |
| RBM18  | 9:125027119  | 0.128   | 0.0127  | 1.36E-23  |
| RBM19  | 12:114396518 | 0.0369  | 0.00401 | 4.75E-20  |
| RBM23  | 14:23388231  | 0.206   | 0.0145  | 3.16E-45  |
| RBM26  | 13:79986065  | 0.0314  | 0.00326 | 8.91E-22  |
| RBM33  | 7:155513837  | 0.0438  | 0.00419 | 2.52E-25  |
| RBM39  | 20:34253842  | -0.0544 | 0.00717 | 4.05E-14  |
| RBM43  | 2:152118275  | 0.168   | 0.00793 | 7.07E-96  |
| RBM44  | 2:238681902  | -0.0639 | 0.00482 | 1.83E-39  |
| RBM47  | 4:40638708   | -0.0332 | 0.00484 | 7.93E-12  |
| RBM48  | 7:92109199   | 0.0834  | 0.0137  | 1.19E-09  |
| RBM5   | 3:50144951   | -0.0242 | 0.00263 | 5.17E-20  |
| RBM6   | 3:50009176   | 0.0975  | 0.0038  | 3.16E-137 |
| RBM8A  | 1:145507253  | 0.0828  | 0.0132  | 4.35E-10  |
| RBMS1  | 2:161136656  | 0.0387  | 0.00366 | 8.52E-26  |
| RBMS2  | 12:56984606  | -0.229  | 0.0147  | 5.26E-53  |
| RBP5   | 12:7262024   | -0.0862 | 0.00561 | 4.20E-52  |
| RBP7   | 1:10059375   | 0.112   | 0.0119  | 8.80E-21  |
| RBPMS  | 8:30454132   | 0.0338  | 0.00436 | 1.02E-14  |
| RBPMS2 | 15:65022906  | -0.408  | 0.00938 | <1.0E-314 |
| RC3H2  | 9:125610975  | 0.051   | 0.00744 | 8.24E-12  |
| RCAN3  | 1:24809462   | -0.0373 | 0.00544 | 7.91E-12  |
| RCBTB1 | 13:50142643  | 0.167   | 0.0047  | 1.05E-248 |
| RCBTB2 | 13:49049232  | 0.0788  | 0.0113  | 3.82E-12  |
| RCC1   | 1:28888794   | -0.209  | 0.03    | 3.45E-12  |
| RCHY1  | 4:76359426   | -0.0489 | 0.00484 | 8.74E-24  |
| RCL1   | 9:4860980    | -0.0953 | 0.00554 | 1.12E-64  |
| RCN1   | 11:32112532  | 0.195   | 0.0184  | 3.84E-26  |
| RCN2   | 15:77241542  | 0.051   | 0.00782 | 7.32E-11  |
| RCOR1  | 14:103058067 | -0.0401 | 0.0064  | 4.02E-10  |
| RCSD1  | 1:167549747  | -0.0265 | 0.00283 | 1.08E-20  |
| RCVRN  | 17:9814423   | -0.113  | 0.00534 | 8.43E-96  |
| RDH13  | 19:55519940  | -0.152  | 0.00399 | 1.72E-280 |
| RDM1   | 17:34251240  | 0.0434  | 0.00711 | 1.08E-09  |
| REC8   | 14:24641526  | -0.0321 | 0.00402 | 1.78E-15  |
| RECQL  | 12:21654407  | 0.0562  | 0.00458 | 4.19E-34  |
| REEP1  | 2:86453919   | -0.0746 | 0.00463 | 6.60E-57  |
| REEP3  | 10:65271488  | -0.0681 | 0.00834 | 4.07E-16  |

|         |              |          |         |           |
|---------|--------------|----------|---------|-----------|
| REEP4   | 8:21995097   | -0.2     | 0.0102  | 1.01E-82  |
| REEP5   | 5:112234957  | -0.0691  | 0.00402 | 1.94E-64  |
| REL     | 2:61077103   | -0.0245  | 0.00409 | 2.14E-09  |
| RELN    | 7:103485921  | -0.00974 | 0.00161 | 1.54E-09  |
| RELT    | 11:73148498  | -0.0229  | 0.00256 | 4.28E-19  |
| REPS1   | 6:139290015  | -0.154   | 0.0074  | 9.56E-93  |
| RERE    | 1:8490603    | 0.0448   | 0.00298 | 3.55E-50  |
| RETSAT  | 2:85547429   | 0.0806   | 0.00337 | 3.32E-120 |
| REV1    | 2:99995804   | -0.0349  | 0.00267 | 1.69E-38  |
| RFC1    | 4:39301334   | 0.0428   | 0.00338 | 2.37E-36  |
| RFC4    | 3:186497254  | 0.0788   | 0.00518 | 3.20E-51  |
| RFFL    | 17:33424508  | -0.0272  | 0.00359 | 3.63E-14  |
| RFTN1   | 3:16362129   | -0.053   | 0.00386 | 4.12E-42  |
| RFTN2   | 2:198568076  | -0.0772  | 0.00393 | 3.05E-83  |
| RFWD3   | 16:74699293  | 0.103    | 0.00365 | 7.73E-163 |
| RFX7    | 15:56523595  | -0.0388  | 0.00453 | 1.41E-17  |
| RFXANK  | 19:19346396  | -0.0814  | 0.00941 | 6.53E-18  |
| RGCC    | 13:42073408  | 0.0585   | 0.00933 | 3.84E-10  |
| RGL1    | 1:183718530  | -0.0388  | 0.00383 | 7.35E-24  |
| RGL4    | 22:24004914  | -0.0253  | 0.00344 | 2.47E-13  |
| RGP1    | 9:35766116   | 0.0638   | 0.0035  | 4.72E-72  |
| RGS10   | 10:121344255 | 0.185    | 0.0145  | 7.54E-37  |
| RGS17   | 6:153344786  | 0.0578   | 0.00873 | 3.75E-11  |
| RGS18   | 1:192079104  | 0.0373   | 0.00635 | 4.60E-09  |
| RGS3    | 9:116209603  | 0.0223   | 0.00269 | 1.39E-16  |
| RGS5    | 1:163223811  | 0.0358   | 0.00516 | 4.18E-12  |
| RGS6    | 14:72466285  | -0.0747  | 0.00558 | 3.30E-40  |
| RHBDD2  | 7:75500959   | 0.0444   | 0.00546 | 4.61E-16  |
| RHD     | 1:25687901   | -0.709   | 0.0394  | 4.35E-70  |
| RHNO1   | 12:2994134   | -0.0411  | 0.00365 | 5.76E-29  |
| RHOBTB1 | 10:62697642  | 0.0449   | 0.00449 | 2.31E-23  |
| RHOBTB3 | 5:95148129   | -0.0829  | 0.00721 | 2.91E-30  |
| RHOT1   | 17:30456747  | 0.0606   | 0.00504 | 7.94E-33  |
| RIC3    | 11:8133837   | 0.0585   | 0.00769 | 3.42E-14  |
| RIC8A   | 11:204147    | 0.0303   | 0.00319 | 3.74E-21  |
| RIF1    | 2:152225877  | 0.0238   | 0.00338 | 2.27E-12  |
| RIMKLB  | 12:8869396   | -0.132   | 0.0178  | 1.34E-13  |
| RIN1    | 11:66091424  | 0.0537   | 0.00456 | 1.13E-31  |
| RIN3    | 14:92955385  | 0.0372   | 0.00247 | 3.73E-50  |

|          |             |         |         |           |
|----------|-------------|---------|---------|-----------|
| RIOK1    | 6:7435888   | -0.0399 | 0.0038  | 1.49E-25  |
| RIOK2    | 5:96514440  | 0.0633  | 0.00771 | 2.77E-16  |
| RIPK1    | 6:3085129   | -0.0724 | 0.0121  | 2.64E-09  |
| RIPK2    | 8:90763759  | -0.0263 | 0.00378 | 3.51E-12  |
| RIPK3    | 14:24809957 | -0.0324 | 0.00525 | 7.14E-10  |
| RIPK4    | 21:43185345 | -0.0315 | 0.00383 | 2.49E-16  |
| RIT1     | 1:155860609 | 0.0361  | 0.00486 | 1.44E-13  |
| RLN1     | 9:5330464   | -0.073  | 0.00744 | 1.52E-22  |
| RMI1     | 9:86626769  | -0.0674 | 0.00518 | 4.54E-38  |
| RMI2     | 16:11429939 | 0.0523  | 0.00333 | 2.57E-54  |
| RNASE1   | 14:21266957 | -0.0672 | 0.00901 | 1.00E-13  |
| RNASE2   | 14:21433342 | 0.27    | 0.0141  | 1.29E-78  |
| RNASE3   | 14:21347911 | -0.427  | 0.0271  | 9.76E-55  |
| RNASE6   | 14:21248764 | 0.126   | 0.0103  | 7.76E-34  |
| RNASEH2A | 19:12876964 | -0.0388 | 0.00645 | 2.03E-09  |
| RNASEH2B | 13:51472638 | 0.336   | 0.0181  | 3.99E-74  |
| RNASEH2C | 11:65477954 | 0.0363  | 0.00453 | 1.41E-15  |
| RNASEK   | 17:6894691  | 0.0737  | 0.00733 | 1.54E-23  |
| RNASET2  | 6:167360389 | 0.275   | 0.00552 | <1.0E-314 |
| RNF111   | 15:59280119 | 0.155   | 0.0117  | 2.79E-39  |
| RNF114   | 20:48519702 | 0.0616  | 0.0036  | 6.04E-64  |
| RNF115   | 1:145691300 | 0.0369  | 0.00569 | 1.05E-10  |
| RNF122   | 8:33413413  | 0.113   | 0.0187  | 1.57E-09  |
| RNF13    | 3:149575345 | -0.0995 | 0.00472 | 8.43E-95  |
| RNF139   | 8:125459090 | 0.0588  | 0.00903 | 8.00E-11  |
| RNF14    | 5:141348289 | -0.107  | 0.00867 | 1.00E-34  |
| RNF141   | 11:10583600 | 0.198   | 0.0223  | 9.72E-19  |
| RNF144B  | 6:18412469  | -0.107  | 0.00619 | 2.12E-65  |
| RNF145   | 5:158599358 | 0.0242  | 0.00384 | 3.28E-10  |
| RNF149   | 2:101904406 | -0.0422 | 0.00404 | 2.54E-25  |
| RNF152   | 18:59484202 | 0.0279  | 0.00454 | 7.91E-10  |
| RNF166   | 16:88751207 | 0.0695  | 0.00588 | 6.62E-32  |
| RNF167   | 17:4824339  | -0.155  | 0.0178  | 3.81E-18  |
| RNF168   | 3:196231122 | -0.101  | 0.00436 | 2.10E-112 |
| RNF17    | 13:25354456 | 0.0226  | 0.00333 | 1.11E-11  |
| RNF175   | 4:154691588 | 0.0599  | 0.00596 | 1.72E-23  |
| RNF181   | 2:85826132  | -0.0292 | 0.00436 | 2.48E-11  |
| RNF182   | 6:13889438  | 1.28    | 0.0293  | <1.0E-314 |
| RNF185   | 22:31641683 | -0.365  | 0.0274  | 6.37E-40  |

|        |              |         |         |           |
|--------|--------------|---------|---------|-----------|
| RNF19A | 8:101370427  | -0.0347 | 0.00462 | 6.98E-14  |
| RNF19B | 1:33440850   | -0.0979 | 0.00829 | 9.62E-32  |
| RNF2   | 1:185114834  | 0.126   | 0.00929 | 5.59E-41  |
| RNF20  | 9:104309445  | 0.112   | 0.00549 | 1.18E-89  |
| RNF212 | 4:1107478    | 0.036   | 0.00425 | 3.44E-17  |
| RNF216 | 7:5748370    | -0.0604 | 0.00584 | 7.38E-25  |
| RNF217 | 6:125265999  | -0.0834 | 0.00786 | 5.05E-26  |
| RNF219 | 13:79183874  | 0.0904  | 0.00543 | 1.09E-60  |
| RNF24  | 20:4001653   | 0.0427  | 0.00431 | 5.82E-23  |
| RNF32  | 7:156518195  | 0.0541  | 0.00531 | 3.67E-24  |
| RNF34  | 12:121859000 | -0.0439 | 0.00539 | 4.62E-16  |
| RNF38  | 9:36414837   | 0.0389  | 0.00532 | 2.76E-13  |
| RNF4   | 4:2470892    | 0.0387  | 0.00547 | 1.70E-12  |
| RNF43  | 17:56440474  | -0.0309 | 0.00493 | 4.24E-10  |
| RNF44  | 5:175968614  | -0.0598 | 0.00957 | 4.44E-10  |
| RNF6   | 13:26790174  | -0.0351 | 0.00401 | 2.62E-18  |
| RNF8   | 6:37348920   | -0.0491 | 0.00327 | 4.95E-50  |
| RNFT2  | 12:117327651 | -0.0208 | 0.00355 | 4.50E-09  |
| RNGTT  | 6:89672913   | -0.115  | 0.00757 | 4.27E-51  |
| RNMT   | 18:13708328  | -0.0953 | 0.0049  | 1.29E-81  |
| RNPEP  | 1:201944214  | 0.2     | 0.00391 | <1.0E-314 |
| RNPS1  | 16:2348208   | 0.0536  | 0.00739 | 4.48E-13  |
| ROBO1  | 3:78726203   | 0.0161  | 0.00251 | 1.55E-10  |
| ROBO3  | 11:124741772 | -0.0121 | 0.00165 | 2.14E-13  |
| ROCK2  | 2:11498147   | 0.0625  | 0.0105  | 2.68E-09  |
| ROGDI  | 16:4860105   | 0.104   | 0.00698 | 7.69E-49  |
| ROPN1B | 3:125731092  | 0.126   | 0.00763 | 7.33E-60  |
| RP9P   | 7:32961023   | -0.114  | 0.0112  | 8.49E-24  |
| RPA1   | 17:1800600   | -0.0732 | 0.00482 | 4.44E-51  |
| RPA2   | 1:28211384   | 0.107   | 0.00485 | 2.13E-103 |
| RPAIN  | 17:5325366   | -0.0496 | 0.00435 | 1.03E-29  |
| RPAP1  | 15:41819716  | -0.0263 | 0.00198 | 1.25E-39  |
| RPAP3  | 12:48077073  | 0.172   | 0.0092  | 3.02E-75  |
| RPE    | 2:210913067  | 0.0484  | 0.00512 | 4.65E-21  |
| RPF1   | 1:84949225   | 0.0761  | 0.0102  | 8.10E-14  |
| RPH3A  | 12:113276968 | 0.111   | 0.00274 | <1.0E-314 |
| RPIA   | 2:89026096   | -0.139  | 0.00909 | 6.47E-52  |
| RPL13  | 16:89628870  | -0.0989 | 0.0042  | 1.43E-116 |
| RPL14  | 3:40497437   | -0.124  | 0.00628 | 7.18E-84  |



|           |              |         |         |           |
|-----------|--------------|---------|---------|-----------|
| RPL15     | 3:23999756   | 0.0822  | 0.0057  | 3.36E-46  |
| RPL17     | 18:47005435  | -0.193  | 0.018   | 1.43E-26  |
| RPL23     | 17:37001974  | -0.0478 | 0.00735 | 8.43E-11  |
| RPL27A    | 11:8719955   | -0.0724 | 0.00687 | 9.94E-26  |
| RPL28     | 19:55897327  | 0.217   | 0.0131  | 2.32E-60  |
| RPL31     | 2:101622728  | 0.352   | 0.00842 | <1.0E-314 |
| RPL34-AS1 | 4:109551077  | 0.0734  | 0.00439 | 3.22E-61  |
| RPL36AL   | 14:50095335  | 0.0827  | 0.00472 | 7.15E-67  |
| RPL37A    | 2:217349605  | 0.0429  | 0.00632 | 1.36E-11  |
| RPL39L    | 3:186865979  | -0.0845 | 0.0107  | 4.07E-15  |
| RPL5      | 1:93356823   | -0.0648 | 0.00446 | 5.05E-47  |
| RPL8      | 8:146012260  | 0.115   | 0.00717 | 1.56E-56  |
| RPN1      | 3:128399623  | -0.052  | 0.0035  | 5.84E-49  |
| RPP14     | 3:58310620   | -0.0649 | 0.00512 | 2.35E-36  |
| RPP21     | 6:30263069   | 0.0498  | 0.00562 | 1.08E-18  |
| RPP25L    | 9:34585385   | 0.0724  | 0.00889 | 4.76E-16  |
| RPRM      | 2:154338708  | -0.044  | 0.00562 | 5.90E-15  |
| RPS15A    | 16:18801583  | 0.573   | 0.0192  | 2.31E-181 |
| RPS16     | 19:39918729  | 0.0646  | 0.00459 | 3.46E-44  |
| RPS18     | 6:33239869   | 0.0614  | 0.00951 | 1.20E-10  |
| RPS20     | 8:56946642   | -0.0384 | 0.00455 | 4.08E-17  |
| RPS23     | 5:81610680   | 0.0602  | 0.00453 | 1.20E-39  |
| RPS24     | 10:79763775  | -0.0254 | 0.00361 | 2.16E-12  |
| RPS25     | 11:118857809 | 0.0966  | 0.00871 | 2.84E-28  |
| RPS6      | 9:19378204   | 0.0398  | 0.00631 | 3.09E-10  |
| RPS6KA1   | 1:26883511   | 0.0285  | 0.00383 | 1.20E-13  |
| RPS6KA5   | 14:91576892  | -0.188  | 0.0123  | 1.78E-51  |
| RPS6KB1   | 17:58037690  | 0.0303  | 0.00485 | 4.82E-10  |
| RPS6KB2   | 11:67200812  | 0.0666  | 0.00879 | 4.20E-14  |
| RPTOR     | 17:78670044  | 0.0401  | 0.00337 | 4.15E-32  |
| RPUSD4    | 11:126081403 | 0.034   | 0.00379 | 3.87E-19  |
| RQCD1     | 2:219408054  | 0.077   | 0.00369 | 4.40E-93  |
| RRAGA     | 9:19049596   | 0.0293  | 0.00484 | 1.54E-09  |
| RRAGD     | 6:90094844   | -0.0715 | 0.00584 | 5.30E-34  |
| RREB1     | 6:7153152    | -0.0168 | 0.00218 | 1.91E-14  |
| RRH       | 4:110740865  | 0.103   | 0.00717 | 5.53E-46  |
| RRM1      | 11:4084113   | -0.0305 | 0.0034  | 4.33E-19  |
| RRM2B     | 8:103244557  | 0.144   | 0.00811 | 2.76E-68  |
| RRN3      | 16:15149240  | 0.345   | 0.0409  | 3.72E-17  |

|           |              |         |         |           |
|-----------|--------------|---------|---------|-----------|
| RRN3P1    | 16:21778925  | -0.395  | 0.0154  | 5.07E-137 |
| RRN3P3    | 16:22435908  | 0.176   | 0.0125  | 6.26E-44  |
| RRP1      | 21:45235270  | 0.0445  | 0.0034  | 1.40E-38  |
| RRP12     | 10:99100432  | -0.116  | 0.00261 | <1.0E-314 |
| RRP15     | 1:218458557  | -0.0454 | 0.00733 | 6.60E-10  |
| RRP1B     | 21:45120994  | -0.0398 | 0.0034  | 2.79E-31  |
| RRP36     | 6:42986363   | 0.0635  | 0.00783 | 6.34E-16  |
| RSAD1     | 17:48568230  | 0.0325  | 0.00317 | 2.29E-24  |
| RSF1      | 11:77360142  | 0.138   | 0.017   | 5.34E-16  |
| RSL1D1    | 16:11947636  | -0.0494 | 0.00483 | 2.60E-24  |
| RSPH10B   | 7:6884357    | -0.0502 | 0.00719 | 3.34E-12  |
| RSPH3     | 6:159413299  | 0.226   | 0.01    | 2.44E-107 |
| RSRC1     | 3:157894615  | 0.111   | 0.00656 | 4.18E-62  |
| RSRC2     | 12:123006368 | -0.0233 | 0.00353 | 4.74E-11  |
| RSU1      | 10:16848473  | 0.254   | 0.00478 | <1.0E-314 |
| RTF1      | 15:41693455  | 0.0435  | 0.00478 | 1.11E-19  |
| RTFDC1    | 20:55101317  | 0.0363  | 0.00363 | 2.41E-23  |
| RTKN2     | 10:63975930  | -0.175  | 0.00663 | 5.74E-145 |
| RTN1      | 14:60239294  | -0.0736 | 0.00485 | 7.26E-51  |
| RTN3      | 11:63541285  | -0.0965 | 0.00993 | 3.83E-22  |
| RTN4      | 2:55270485   | 0.0291  | 0.00247 | 8.30E-32  |
| RTN4IP1   | 6:107077502  | -0.0499 | 0.0049  | 3.84E-24  |
| RTP4      | 3:187081097  | -0.0782 | 0.00886 | 1.48E-18  |
| RUFY1     | 5:179001200  | 0.137   | 0.00439 | 3.26E-195 |
| RUFY2     | 10:70141482  | -0.0464 | 0.00475 | 2.39E-22  |
| RUNDC3A   | 17:42384367  | -0.0951 | 0.00582 | 1.33E-58  |
| RUNX1-IT1 | 21:36388176  | -0.0812 | 0.00786 | 9.58E-25  |
| RUNX1T1   | 8:93088151   | -0.0238 | 0.00358 | 3.08E-11  |
| RUNX2     | 6:45397605   | -0.076  | 0.00953 | 1.83E-15  |
| RUVBL2    | 19:49522075  | 0.042   | 0.00638 | 4.89E-11  |
| RWDD2B    | 21:30376145  | -0.176  | 0.00574 | 1.91E-190 |
| RWDD3     | 1:95715508   | 0.0649  | 0.0072  | 2.67E-19  |
| RWDD4     | 4:184560260  | -0.136  | 0.0132  | 8.95E-25  |
| RXFP2     | 13:32380134  | -0.0798 | 0.00366 | 4.84E-101 |
| RXRA      | 9:137203271  | -0.215  | 0.0279  | 1.72E-14  |
| RYBP      | 3:72504654   | -0.0782 | 0.00444 | 1.72E-67  |
| RYK       | 3:133986994  | 0.0419  | 0.00496 | 4.12E-17  |
| S100A10   | 1:151931004  | -0.0646 | 0.0105  | 7.43E-10  |
| S100A12   | 1:153372890  | -0.382  | 0.0124  | 1.14E-192 |

|         |              |         |         |           |
|---------|--------------|---------|---------|-----------|
| S100A13 | 1:153606294  | -0.197  | 0.00817 | 1.37E-121 |
| S100A8  | 1:153372890  | -0.0317 | 0.00536 | 3.61E-09  |
| S100A9  | 1:153358685  | -0.0889 | 0.00916 | 4.51E-22  |
| S100B   | 21:48039367  | -0.49   | 0.0188  | 1.32E-141 |
| S100P   | 4:6692657    | -0.697  | 0.0171  | <1.0E-314 |
| S100PBP | 1:33245802   | 0.147   | 0.00674 | 1.92E-100 |
| S100Z   | 5:76144774   | -0.115  | 0.00651 | 1.39E-67  |
| SAAL1   | 11:18116894  | 0.0753  | 0.00381 | 8.45E-84  |
| SACM1L  | 3:45723890   | -0.0568 | 0.00336 | 2.36E-62  |
| SAMD12  | 8:119624556  | -0.658  | 0.0147  | <1.0E-314 |
| SAMD3   | 6:130505374  | 0.154   | 0.00924 | 9.83E-61  |
| SAMD9L  | 7:92820113   | 0.371   | 0.0208  | 6.80E-69  |
| SAMHD1  | 20:35558914  | -0.0545 | 0.00678 | 1.12E-15  |
| SAMM50  | 22:44349236  | -0.114  | 0.00481 | 1.56E-118 |
| SAP130  | 2:128785663  | 0.0465  | 0.00692 | 1.88E-11  |
| SAP18   | 13:21709658  | -0.0362 | 0.00322 | 5.96E-29  |
| SAR1A   | 10:71952447  | -0.0347 | 0.00321 | 4.63E-27  |
| SAR1B   | 5:133956668  | 0.0594  | 0.00798 | 1.14E-13  |
| SARS    | 1:109707911  | 0.0267  | 0.00349 | 2.09E-14  |
| SARS2   | 19:39411716  | -0.0281 | 0.00245 | 4.72E-30  |
| SART3   | 12:108922285 | 0.0273  | 0.00392 | 3.30E-12  |
| SASH1   | 6:148702844  | -0.0501 | 0.00434 | 2.14E-30  |
| SASS6   | 1:100528819  | -0.115  | 0.00882 | 1.97E-38  |
| SATB1   | 3:18444171   | -0.0406 | 0.00584 | 4.12E-12  |
| SAV1    | 14:51182036  | 0.0357  | 0.00523 | 1.05E-11  |
| SAYSD1  | 6:39069268   | -0.0756 | 0.00431 | 6.70E-67  |
| SBDS    | 7:66453476   | 0.224   | 0.037   | 1.53E-09  |
| SBF2    | 11:10277058  | -0.0612 | 0.00356 | 2.12E-64  |
| SBNO1   | 12:123799974 | -0.0296 | 0.00388 | 2.80E-14  |
| SBNO2   | 19:1127981   | -0.0298 | 0.00261 | 6.93E-30  |
| SC5DL   | 11:121179549 | -0.126  | 0.00969 | 7.38E-38  |
| SCAF11  | 12:46322449  | 0.046   | 0.00426 | 7.01E-27  |
| SCAF8   | 6:155118812  | -0.0363 | 0.00265 | 9.43E-42  |
| SCAI    | 9:127803160  | -0.0415 | 0.00492 | 4.04E-17  |
| SCAMP1  | 5:77646075   | -0.0374 | 0.00429 | 3.31E-18  |
| SCAMP2  | 15:75202205  | -0.0427 | 0.0036  | 4.60E-32  |
| SCAND2  | 15:85168758  | 0.0583  | 0.00419 | 2.95E-43  |
| SCAP    | 3:47409614   | 0.0234  | 0.00228 | 1.70E-24  |
| SCAPER  | 15:76831236  | -0.109  | 0.00389 | 3.65E-161 |

|         |              |         |         |           |
|---------|--------------|---------|---------|-----------|
| SCARB1  | 12:125334375 | -0.0149 | 0.00228 | 6.02E-11  |
| SCCPDH  | 1:246884464  | 0.0995  | 0.00617 | 4.42E-57  |
| SCD5    | 4:83764403   | -0.067  | 0.00372 | 2.90E-70  |
| SCFD1   | 14:31103012  | -0.113  | 0.00412 | 1.13E-155 |
| SCFD2   | 4:54044696   | -0.0452 | 0.00502 | 2.83E-19  |
| SCGB1A1 | 11:62193981  | -0.048  | 0.00512 | 1.09E-20  |
| SCGB3A1 | 5:179981603  | -0.11   | 0.00632 | 4.32E-66  |
| SCGB3A2 | 5:147246760  | -0.284  | 0.00746 | 1.84E-280 |
| SCIMP   | 17:5132316   | 0.165   | 0.00716 | 5.54E-112 |
| SCLT1   | 4:129876588  | -0.0492 | 0.00536 | 6.37E-20  |
| SCLY    | 2:238994676  | -0.0229 | 0.00297 | 1.73E-14  |
| SCMH1   | 1:41544279   | -0.0184 | 0.00305 | 1.55E-09  |
| SCML4   | 6:108047036  | -0.0682 | 0.00524 | 3.57E-38  |
| SCN8A   | 12:51966950  | -0.0457 | 0.00383 | 2.05E-32  |
| SCN9A   | 2:167237057  | 0.0827  | 0.00307 | 1.97E-149 |
| SCOC    | 4:141287386  | -0.0791 | 0.0108  | 2.63E-13  |
| SCP2    | 1:53343880   | -0.165  | 0.00397 | <1.0E-314 |
| SCRG1   | 4:174323131  | -0.0357 | 0.0045  | 2.82E-15  |
| SCRN1   | 7:30063476   | 0.0804  | 0.00606 | 1.35E-39  |
| SCRN2   | 17:45884026  | 0.0342  | 0.00535 | 1.73E-10  |
| SCRN3   | 2:175287256  | -0.123  | 0.00492 | 8.26E-131 |
| SCRT2   | 20:643919    | 0.0621  | 0.0056  | 3.09E-28  |
| SCYL3   | 1:169784165  | -0.0669 | 0.00587 | 9.57E-30  |
| SDCCAG3 | 9:139311471  | 0.0722  | 0.00421 | 2.88E-64  |
| SDCCAG8 | 1:243420388  | -0.1    | 0.00395 | 1.91E-134 |
| SDF4    | 1:1124750    | -0.0953 | 0.00703 | 3.32E-41  |
| SDHA    | 5:215395     | 0.494   | 0.0318  | 2.58E-53  |
| SDK1    | 7:3718417    | -0.0104 | 0.00164 | 2.89E-10  |
| SDK2    | 17:71587577  | 0.0329  | 0.00403 | 3.82E-16  |
| SEC11A  | 15:85301836  | -0.0225 | 0.00318 | 1.68E-12  |
| SEC11C  | 18:56771813  | 0.0561  | 0.00811 | 5.32E-12  |
| SEC13   | 3:10314602   | -0.0516 | 0.00332 | 3.70E-53  |
| SEC14L1 | 17:75170281  | 0.0605  | 0.00695 | 4.52E-18  |
| SEC14L2 | 22:30794719  | -0.0273 | 0.00329 | 1.55E-16  |
| SEC14L3 | 22:30853363  | -0.0847 | 0.00379 | 1.21E-105 |
| SEC22C  | 3:42608030   | 0.062   | 0.00401 | 9.65E-53  |
| SEC23A  | 14:39531992  | -0.0319 | 0.00367 | 4.27E-18  |
| SEC23B  | 20:18470664  | 0.102   | 0.00406 | 1.57E-130 |
| SEC23IP | 10:121639683 | 0.0522  | 0.00586 | 7.50E-19  |

|           |              |         |         |           |
|-----------|--------------|---------|---------|-----------|
| SEC31B    | 10:102278128 | 0.0764  | 0.00309 | 1.04E-127 |
| SEC61A1   | 3:127740172  | 0.021   | 0.00355 | 3.21E-09  |
| SEC61A2   | 10:12190321  | 0.126   | 0.00448 | 5.52E-161 |
| SEC62     | 3:169688367  | -0.0504 | 0.0083  | 1.34E-09  |
| SECISBP2L | 15:49293194  | 0.0255  | 0.00412 | 7.26E-10  |
| SECTM1    | 17:80317656  | 0.163   | 0.0187  | 3.58E-18  |
| SEH1L     | 18:13002306  | 0.0346  | 0.00457 | 4.37E-14  |
| SEL1L3    | 4:25881205   | -0.0637 | 0.00553 | 2.61E-30  |
| SELK      | 3:53926017   | -0.114  | 0.00645 | 5.51E-68  |
| SELL      | 1:169665632  | 0.123   | 0.00581 | 4.19E-95  |
| SELP      | 1:169572645  | -0.052  | 0.00784 | 3.75E-11  |
| SELPLG    | 12:109013319 | 0.0767  | 0.00461 | 1.25E-60  |
| SELRC1    | 1:53142832   | -0.0303 | 0.00502 | 1.75E-09  |
| SELT      | 3:150341842  | -0.108  | 0.00546 | 2.05E-83  |
| SEMA3A    | 7:83803086   | -0.0879 | 0.00655 | 2.38E-40  |
| SEMA3C    | 7:80357963   | 0.0804  | 0.00758 | 5.39E-26  |
| SEMA4A    | 1:156153464  | -0.0557 | 0.00444 | 1.38E-35  |
| SEMA4B    | 15:90767860  | -0.0525 | 0.00478 | 1.05E-27  |
| SEMA4D    | 9:92077132   | -0.0422 | 0.00395 | 2.47E-26  |
| SEMA4G    | 10:102700479 | -0.0217 | 0.00302 | 7.31E-13  |
| SEMA5A    | 5:9547958    | -0.0611 | 0.0038  | 7.69E-57  |
| SEMA6A    | 5:115740153  | 0.0339  | 0.00381 | 8.24E-19  |
| SEMG1     | 20:43824279  | 0.0724  | 0.0101  | 7.48E-13  |
| SENP1     | 12:48489117  | 0.0613  | 0.00316 | 7.43E-81  |
| SENP3     | 17:7475233   | 0.0286  | 0.00358 | 1.57E-15  |
| SENP6     | 6:76274825   | 0.121   | 0.00356 | 8.02E-229 |
| SENP7     | 3:101198604  | -0.095  | 0.00398 | 6.89E-120 |
| SEPP1     | 5:42751797   | -0.0418 | 0.00473 | 1.44E-18  |
| SEPSECS   | 4:25159390   | -0.0644 | 0.00772 | 9.49E-17  |
| SEPT10    | 2:110316285  | 0.056   | 0.0083  | 1.63E-11  |
| SEPT11    | 4:77915302   | -0.059  | 0.00439 | 1.72E-40  |
| SEPT2     | 2:242237945  | -0.343  | 0.00756 | <1.0E-314 |
| SEPT8     | 5:132099999  | 0.0393  | 0.00585 | 2.09E-11  |
| SEPW1     | 19:48262121  | -0.0251 | 0.00385 | 7.81E-11  |
| SERAC1    | 6:158577049  | -0.105  | 0.0041  | 5.65E-137 |
| SERHL     | 22:42946371  | -0.113  | 0.00905 | 3.21E-35  |
| SERHL2    | 22:43001128  | -0.0508 | 0.0052  | 2.32E-22  |
| SERINC1   | 6:122827891  | 0.0645  | 0.00553 | 4.78E-31  |
| SERINC2   | 1:31901133   | 0.0354  | 0.0046  | 1.72E-14  |

|           |              |         |         |           |
|-----------|--------------|---------|---------|-----------|
| SERINC3   | 20:43150309  | 0.162   | 0.0124  | 2.59E-38  |
| SERINC5   | 5:79419712   | 0.0654  | 0.00918 | 1.25E-12  |
| SERPINA1  | 14:94854852  | -0.102  | 0.00483 | 3.79E-94  |
| SERPINB1  | 6:2856192    | -0.0396 | 0.00485 | 3.84E-16  |
| SERPINB10 | 18:61562371  | -0.0978 | 0.00591 | 5.23E-60  |
| SERPINB2  | 18:61562690  | 0.0773  | 0.00526 | 6.09E-48  |
| SERPINB6  | 6:2940666    | 0.139   | 0.00472 | 9.71E-176 |
| SERPINB8  | 18:61626118  | 0.101   | 0.00483 | 1.83E-93  |
| SERPINB9  | 6:2857442    | 0.0734  | 0.00476 | 1.26E-52  |
| SERPIND1  | 22:21118650  | -0.0621 | 0.00909 | 9.45E-12  |
| SERPINE2  | 2:224893921  | 0.123   | 0.00487 | 1.29E-132 |
| SERPING1  | 11:57399511  | -0.103  | 0.011   | 6.48E-21  |
| SERPINH1  | 11:75293939  | -0.035  | 0.00403 | 5.02E-18  |
| SERPINI1  | 3:167407378  | -0.045  | 0.00749 | 2.10E-09  |
| SERTAD2   | 2:64865804   | 0.0357  | 0.00497 | 7.86E-13  |
| SERTAD3   | 19:40947373  | 0.126   | 0.00707 | 1.37E-68  |
| SES1      | 6:109328432  | -0.122  | 0.0065  | 4.69E-76  |
| SES3      | 11:94886632  | 0.0895  | 0.00714 | 1.47E-35  |
| SESTD1    | 2:180060658  | -0.142  | 0.00612 | 4.79E-114 |
| SETD4     | 21:37409835  | 0.0613  | 0.00385 | 9.10E-56  |
| SETD9     | 5:56237155   | 0.223   | 0.00568 | 4.02E-295 |
| SETDB1    | 1:150937661  | 0.0207  | 0.0032  | 1.07E-10  |
| SETMAR    | 3:4403537    | -0.121  | 0.00435 | 2.09E-159 |
| SETX      | 9:135210753  | -0.0414 | 0.00607 | 9.76E-12  |
| SF3A1     | 22:30742623  | -0.0226 | 0.00336 | 1.77E-11  |
| SF3B1     | 2:198255495  | -0.0353 | 0.00307 | 3.54E-30  |
| SF3B2     | 11:65785211  | 0.0442  | 0.00358 | 1.10E-34  |
| SFMBT1    | 3:53083742   | -0.0649 | 0.007   | 2.93E-20  |
| SFN       | 1:27221700   | 0.0247  | 0.00411 | 1.95E-09  |
| SFR1      | 10:105908597 | 0.113   | 0.00797 | 1.44E-44  |
| SFRP2     | 4:154691808  | -0.112  | 0.0097  | 1.62E-30  |
| SFT2D1    | 6:166736518  | -0.106  | 0.0086  | 2.07E-34  |
| SFXN3     | 10:102791911 | -0.054  | 0.00642 | 5.25E-17  |
| SFXN4     | 10:120907808 | 0.228   | 0.00521 | <1.0E-314 |
| SGCB      | 4:52900422   | -0.0981 | 0.00854 | 3.52E-30  |
| SGCE      | 7:94166160   | -0.0386 | 0.00362 | 2.88E-26  |
| SGIP1     | 1:66999215   | 0.12    | 0.00472 | 5.77E-134 |
| SGK1      | 6:134585412  | -0.126  | 0.0117  | 1.62E-26  |
| SGMS1     | 10:52370312  | -0.0235 | 0.00299 | 4.69E-15  |

|          |              |         |         |           |
|----------|--------------|---------|---------|-----------|
| SGOL1    | 3:20187080   | 0.0698  | 0.00966 | 5.63E-13  |
| SGPL1    | 10:72602314  | -0.0757 | 0.00746 | 5.57E-24  |
| SGSH     | 17:78184393  | -0.0364 | 0.00296 | 2.66E-34  |
| SGTB     | 5:65053753   | -0.0465 | 0.00515 | 2.30E-19  |
| SH3BGRL2 | 6:80325857   | 0.0871  | 0.00996 | 2.88E-18  |
| SH3BGRL3 | 1:26603883   | 0.145   | 0.00577 | 6.29E-131 |
| SH3BP1   | 22:38029723  | -0.0481 | 0.00359 | 2.25E-40  |
| SH3BP2   | 4:2813503    | -0.0194 | 0.00281 | 5.68E-12  |
| SH3BP5   | 3:15321396   | -0.0355 | 0.0038  | 1.31E-20  |
| SH3GLB2  | 9:131782964  | 0.0352  | 0.00404 | 3.88E-18  |
| SH3PXD2B | 5:171878751  | 0.0976  | 0.00842 | 1.01E-30  |
| SH3RF1   | 4:170217661  | -0.0429 | 0.0032  | 2.03E-40  |
| SH3YL1   | 2:264621     | 0.162   | 0.00528 | 1.07E-189 |
| SHARPIN  | 8:145128896  | -0.0721 | 0.00822 | 2.50E-18  |
| SHC1     | 1:154922599  | -0.0815 | 0.00703 | 9.00E-31  |
| SHISA4   | 1:201871833  | -0.0609 | 0.00654 | 1.68E-20  |
| SHKBP1   | 19:41111069  | -0.152  | 0.00404 | 4.82E-273 |
| SHMT1    | 17:18264449  | -0.0622 | 0.0036  | 3.15E-65  |
| SIAH1    | 16:48390512  | -0.0574 | 0.00546 | 1.61E-25  |
| SIAH2    | 3:150439774  | 0.18    | 0.0248  | 4.55E-13  |
| SIDT1    | 3:113208224  | 0.121   | 0.00623 | 8.72E-81  |
| SIDT2    | 11:117002403 | 0.278   | 0.0063  | <1.0E-314 |
| SIGLEC10 | 19:51912018  | 0.13    | 0.00819 | 4.74E-55  |
| SIGLEC11 | 19:50463982  | -0.0496 | 0.00411 | 4.54E-33  |
| SIGLEC12 | 19:52004074  | -0.0235 | 0.00354 | 3.78E-11  |
| SIGLEC5  | 19:52130830  | -0.0821 | 0.00604 | 2.27E-41  |
| SIGLEC6  | 19:52047077  | 0.0277  | 0.00367 | 5.23E-14  |
| SIGLEC7  | 19:51642784  | -0.0307 | 0.00443 | 4.75E-12  |
| SIGLEC9  | 19:51642784  | -0.0509 | 0.00445 | 5.99E-30  |
| SIGMAR1  | 9:34638080   | 0.0423  | 0.00632 | 2.35E-11  |
| SIK2     | 11:111493176 | -0.0309 | 0.00252 | 5.30E-34  |
| SIMC1    | 5:175797242  | 0.0623  | 0.00601 | 6.26E-25  |
| SIN3B    | 19:16913358  | 0.0586  | 0.00756 | 1.12E-14  |
| SIPA1L1  | 14:72023372  | -0.0311 | 0.00425 | 2.64E-13  |
| SIRPA    | 20:1894335   | 0.143   | 0.00457 | 3.34E-197 |
| SIRPB1   | 20:1546175   | -0.264  | 0.00546 | <1.0E-314 |
| SIRPB2   | 20:1457045   | -0.241  | 0.00641 | 2.45E-273 |
| SIRPD    | 20:1539165   | -0.06   | 0.00525 | 6.06E-30  |
| SIRPG    | 20:1626479   | -0.0377 | 0.00584 | 1.18E-10  |

|         |              |         |         |           |
|---------|--------------|---------|---------|-----------|
| SIRT1   | 10:69644217  | -0.119  | 0.00336 | 1.31E-246 |
| SIRT3   | 11:218640    | -0.0324 | 0.00332 | 2.77E-22  |
| SIRT4   | 12:120785685 | -0.0774 | 0.0127  | 1.28E-09  |
| SIRT5   | 6:13580885   | 0.12    | 0.00373 | 6.09E-206 |
| SKA3    | 13:21747051  | 0.0531  | 0.00774 | 7.52E-12  |
| SKAP1   | 17:46347508  | -0.0439 | 0.00521 | 4.96E-17  |
| SKAP2   | 7:26833021   | 0.201   | 0.00469 | <1.0E-314 |
| SKIV2L  | 6:31934372   | -0.0464 | 0.00329 | 2.25E-44  |
| SKP1    | 5:133514425  | -0.101  | 0.00864 | 3.82E-31  |
| SKP2    | 5:36179044   | -0.0515 | 0.005   | 1.18E-24  |
| SLA     | 8:134106641  | -0.183  | 0.0152  | 5.77E-33  |
| SLAIN1  | 13:78362028  | -0.0471 | 0.00572 | 2.36E-16  |
| SLAIN2  | 4:48429269   | 0.0542  | 0.0039  | 3.15E-43  |
| SLAMF8  | 1:159801155  | 0.0421  | 0.00594 | 1.48E-12  |
| SLBP    | 4:1747523    | 0.0366  | 0.00448 | 3.82E-16  |
| SLC11A1 | 2:219230213  | 0.228   | 0.011   | 2.95E-91  |
| SLC12A1 | 15:48520590  | 1.92    | 0.0276  | <1.0E-314 |
| SLC12A2 | 5:127433047  | 0.0529  | 0.00386 | 5.52E-42  |
| SLC12A4 | 16:68024995  | -0.0227 | 0.00302 | 6.74E-14  |
| SLC12A6 | 15:34580322  | 0.046   | 0.00328 | 8.05E-44  |
| SLC12A7 | 5:1107428    | 0.112   | 0.00656 | 6.59E-64  |
| SLC12A9 | 7:100446365  | 0.0284  | 0.00412 | 6.35E-12  |
| SLC13A4 | 7:135349273  | -0.0485 | 0.00302 | 8.58E-57  |
| SLC14A1 | 18:43311483  | 0.235   | 0.0213  | 6.39E-28  |
| SLC15A2 | 3:121566498  | -0.0621 | 0.00534 | 6.56E-31  |
| SLC15A4 | 12:129272242 | 0.139   | 0.0114  | 1.14E-33  |
| SLC16A1 | 1:113443510  | -0.0952 | 0.00586 | 5.69E-58  |
| SLC16A3 | 17:80149901  | -0.106  | 0.00846 | 3.07E-35  |
| SLC16A4 | 1:110938530  | 0.0991  | 0.0106  | 1.63E-20  |
| SLC16A6 | 17:66267650  | -0.0905 | 0.00699 | 1.08E-37  |
| SLC17A3 | 6:25883714   | 0.0359  | 0.00364 | 9.72E-23  |
| SLC17A5 | 6:74278062   | -0.0585 | 0.00644 | 1.45E-19  |
| SLC18A1 | 8:20031409   | -0.0484 | 0.00662 | 3.08E-13  |
| SLC18A2 | 10:118988797 | -0.0567 | 0.00859 | 4.45E-11  |
| SLC18B1 | 6:133119816  | 0.404   | 0.0118  | 3.81E-230 |
| SLC19A2 | 1:169477574  | -0.0634 | 0.0069  | 5.70E-20  |
| SLC1A3  | 5:36702864   | 0.0395  | 0.00386 | 2.43E-24  |
| SLC1A4  | 2:65218647   | -0.0568 | 0.0052  | 1.64E-27  |
| SLC1A5  | 19:47312547  | -0.109  | 0.014   | 1.16E-14  |



|          |              |         |         |           |
|----------|--------------|---------|---------|-----------|
| SLC20A1  | 2:113457049  | 0.0984  | 0.00371 | 3.12E-145 |
| SLC20A2  | 8:42425673   | -0.0465 | 0.00294 | 3.49E-55  |
| SLC22A1  | 6:160524578  | 0.102   | 0.00533 | 5.46E-79  |
| SLC22A15 | 1:116518811  | -0.151  | 0.00545 | 1.98E-157 |
| SLC22A16 | 6:110797905  | -0.111  | 0.00571 | 6.29E-82  |
| SLC22A18 | 11:2929659   | 0.0267  | 0.00278 | 1.23E-21  |
| SLC22A23 | 6:3354974    | -0.0265 | 0.0034  | 8.71E-15  |
| SLC22A4  | 5:131673267  | -0.114  | 0.00517 | 5.26E-103 |
| SLC22A5  | 5:131677047  | 0.0697  | 0.00304 | 9.43E-111 |
| SLC23A2  | 20:4953230   | -0.0394 | 0.00452 | 3.92E-18  |
| SLC23A3  | 2:220045035  | -0.0386 | 0.00364 | 4.38E-26  |
| SLC24A3  | 20:19281291  | 0.0433  | 0.00351 | 1.42E-34  |
| SLC24A4  | 14:92955385  | 0.0633  | 0.00444 | 2.82E-45  |
| SLC24A5  | 15:48462320  | -0.226  | 0.0217  | 4.20E-25  |
| SLC25A1  | 22:19180652  | -0.1    | 0.00599 | 5.59E-61  |
| SLC25A12 | 2:172694629  | -0.0206 | 0.00322 | 1.90E-10  |
| SLC25A13 | 7:95956217   | -0.0444 | 0.004   | 2.16E-28  |
| SLC25A21 | 14:37688167  | -0.0469 | 0.00378 | 7.57E-35  |
| SLC25A24 | 1:108743059  | 0.103   | 0.00426 | 3.20E-122 |
| SLC25A26 | 3:66424979   | 0.0687  | 0.00407 | 2.11E-62  |
| SLC25A28 | 10:101381564 | -0.0369 | 0.00485 | 3.18E-14  |
| SLC25A29 | 14:100810426 | -0.0562 | 0.0051  | 6.01E-28  |
| SLC25A3  | 12:98987445  | -0.0402 | 0.00515 | 7.53E-15  |
| SLC25A32 | 8:104461878  | -0.0767 | 0.00403 | 3.10E-78  |
| SLC25A37 | 8:23457200   | 0.0746  | 0.00906 | 2.31E-16  |
| SLC25A44 | 1:156181615  | 0.0297  | 0.00472 | 3.50E-10  |
| SLC25A46 | 5:110025473  | 0.0762  | 0.00643 | 5.74E-32  |
| SLC25A51 | 9:37837140   | 0.153   | 0.0195  | 4.98E-15  |
| SLC26A5  | 7:103012705  | -0.318  | 0.00775 | <1.0E-314 |
| SLC26A6  | 3:48678011   | -0.0323 | 0.00385 | 6.69E-17  |
| SLC26A8  | 6:35961891   | -0.0812 | 0.00609 | 7.15E-40  |
| SLC27A3  | 1:153748219  | -0.0597 | 0.00664 | 3.29E-19  |
| SLC28A2  | 15:45561868  | 0.0406  | 0.00287 | 1.09E-44  |
| SLC28A3  | 9:86983368   | 0.0934  | 0.00852 | 1.17E-27  |
| SLC29A3  | 10:73135743  | 0.0327  | 0.00456 | 8.19E-13  |
| SLC2A1   | 1:43440783   | 0.0433  | 0.00495 | 2.53E-18  |
| SLC30A4  | 15:45730926  | 0.0319  | 0.00508 | 3.56E-10  |
| SLC30A5  | 5:68419908   | 0.018   | 0.00287 | 3.71E-10  |
| SLC30A6  | 2:32391231   | 0.0265  | 0.00422 | 3.87E-10  |

|          |              |         |         |           |
|----------|--------------|---------|---------|-----------|
| SLC30A9  | 4:41992752   | 0.315   | 0.0182  | 1.07E-65  |
| SLC31A1  | 9:116025982  | 0.112   | 0.00753 | 2.69E-49  |
| SLC31A2  | 9:115917783  | -0.0699 | 0.00572 | 7.36E-34  |
| SLC33A1  | 3:155535765  | 0.0517  | 0.00385 | 1.65E-40  |
| SLC35A1  | 6:88190108   | -0.0378 | 0.00393 | 8.91E-22  |
| SLC35A5  | 3:112242208  | 0.0648  | 0.00846 | 2.25E-14  |
| SLC35B2  | 6:44205845   | -0.0337 | 0.00421 | 1.42E-15  |
| SLC35B3  | 6:8435883    | 0.0281  | 0.00374 | 6.35E-14  |
| SLC35C1  | 11:45834201  | 0.0316  | 0.00529 | 2.52E-09  |
| SLC35D1  | 1:67529243   | 0.0955  | 0.00608 | 1.87E-54  |
| SLC35D2  | 9:99173448   | 0.0436  | 0.00544 | 1.24E-15  |
| SLC35E1  | 19:16699813  | 0.0502  | 0.00405 | 9.37E-35  |
| SLC35E3  | 12:69184350  | 0.0677  | 0.00425 | 8.02E-56  |
| SLC35F3  | 1:234451159  | -0.0302 | 0.00274 | 5.39E-28  |
| SLC35F5  | 2:114541449  | 0.0237  | 0.00351 | 1.55E-11  |
| SLC36A1  | 5:150883158  | -0.132  | 0.00507 | 1.74E-141 |
| SLC37A2  | 11:124958397 | -0.0362 | 0.00398 | 1.26E-19  |
| SLC37A3  | 7:140098605  | 0.112   | 0.00689 | 6.79E-58  |
| SLC38A10 | 17:79245770  | -0.0278 | 0.0031  | 4.46E-19  |
| SLC38A11 | 2:165834674  | -0.0719 | 0.0114  | 3.05E-10  |
| SLC38A4  | 12:47139555  | -0.0508 | 0.00505 | 1.23E-23  |
| SLC38A6  | 14:61514673  | -0.0494 | 0.00668 | 1.78E-13  |
| SLC39A1  | 1:153895936  | -0.0448 | 0.00468 | 1.50E-21  |
| SLC39A11 | 17:71027543  | 0.0653  | 0.00625 | 2.78E-25  |
| SLC39A6  | 18:33709217  | -0.0237 | 0.00353 | 2.24E-11  |
| SLC39A8  | 4:103225513  | -0.0574 | 0.0051  | 4.94E-29  |
| SLC39A9  | 14:69934611  | -0.167  | 0.00812 | 6.32E-91  |
| SLC40A1  | 2:190441317  | -0.0753 | 0.00604 | 3.70E-35  |
| SLC41A1  | 1:205799987  | -0.0171 | 0.00255 | 2.11E-11  |
| SLC41A2  | 12:105353244 | 0.0592  | 0.00681 | 4.68E-18  |
| SLC41A3  | 3:125794616  | 0.0446  | 0.00288 | 5.78E-53  |
| SLC44A2  | 19:10703339  | 0.113   | 0.00532 | 1.28E-95  |
| SLC44A4  | 6:31836827   | -0.247  | 0.00463 | <1.0E-314 |
| SLC44A5  | 1:75911113   | -0.168  | 0.00451 | 1.40E-270 |
| SLC45A4  | 8:142277620  | 0.136   | 0.0135  | 1.17E-23  |
| SLC46A2  | 9:115673533  | 0.0503  | 0.00398 | 3.84E-36  |
| SLC47A1  | 17:19525492  | 0.0333  | 0.00314 | 5.68E-26  |
| SLC48A1  | 12:48169526  | -0.0815 | 0.00434 | 3.76E-76  |
| SLC4A1   | 17:42313512  | -0.0912 | 0.013   | 2.91E-12  |

|          |              |         |         |           |
|----------|--------------|---------|---------|-----------|
| SLC4A7   | 3:27493730   | 0.0832  | 0.0119  | 3.51E-12  |
| SLC4A8   | 12:51847800  | -0.0331 | 0.00376 | 1.79E-18  |
| SLC5A11  | 16:24835168  | -0.0398 | 0.0033  | 4.12E-33  |
| SLC5A3   | 21:35401161  | 0.0617  | 0.00781 | 3.52E-15  |
| SLC5A4   | 22:32599716  | 0.0359  | 0.00379 | 4.02E-21  |
| SLC5A6   | 2:27458790   | 0.0546  | 0.00405 | 6.96E-41  |
| SLC6A12  | 12:329131    | -0.0244 | 0.00385 | 2.44E-10  |
| SLC6A16  | 19:49867913  | 0.0406  | 0.00511 | 2.26E-15  |
| SLC6A6   | 3:14520560   | -0.1    | 0.00539 | 4.45E-75  |
| SLC7A1   | 13:30202377  | -0.067  | 0.00614 | 2.30E-27  |
| SLC7A11  | 4:139147725  | -0.147  | 0.0144  | 2.97E-24  |
| SLC7A6   | 16:68317061  | 0.096   | 0.00432 | 1.34E-104 |
| SLC7A6OS | 16:68317061  | 0.0324  | 0.00326 | 4.47E-23  |
| SLC7A7   | 14:23285439  | 0.0787  | 0.00584 | 1.04E-40  |
| SLC7A8   | 14:23631372  | -0.323  | 0.0116  | 1.73E-160 |
| SLC8A1   | 2:40687437   | 0.0955  | 0.00572 | 4.87E-61  |
| SLC9A2   | 2:103347094  | -0.0492 | 0.00345 | 2.22E-45  |
| SLC9A3R1 | 17:72767435  | -0.0366 | 0.00278 | 4.83E-39  |
| SLC9B1   | 4:103832044  | -0.0505 | 0.00516 | 1.98E-22  |
| SLC9B2   | 4:104010619  | 0.0291  | 0.00387 | 6.53E-14  |
| SLCO3A1  | 15:92399657  | 0.0415  | 0.0035  | 5.25E-32  |
| SLCO4C1  | 5:101604320  | -0.101  | 0.00591 | 3.15E-63  |
| SLFN11   | 17:33727598  | -0.0812 | 0.0098  | 1.47E-16  |
| SLFN12   | 17:33753808  | -0.241  | 0.00925 | 1.58E-140 |
| SLFN13   | 17:33801032  | -0.0602 | 0.00582 | 8.09E-25  |
| SLFN5    | 17:33563302  | -0.149  | 0.00483 | 1.76E-193 |
| SLIRP    | 14:78207178  | 0.172   | 0.015   | 3.93E-30  |
| SLIT1    | 10:98993813  | -0.0144 | 0.00165 | 3.00E-18  |
| SLK      | 10:105723183 | -0.0327 | 0.00463 | 1.76E-12  |
| SLMO2    | 20:57593158  | 0.0367  | 0.00525 | 3.17E-12  |
| SLPI     | 20:43888106  | 0.114   | 0.0163  | 3.36E-12  |
| SMAD1    | 4:146392431  | 0.0305  | 0.00376 | 5.31E-16  |
| SMAD4    | 18:48553225  | -0.0269 | 0.00257 | 2.18E-25  |
| SMAD5    | 5:135516203  | -0.115  | 0.0049  | 3.37E-115 |
| SMAP1    | 6:71375961   | -0.059  | 0.00282 | 8.90E-94  |
| SMAP2    | 1:40838636   | -0.0293 | 0.00466 | 3.62E-10  |
| SMARCA4  | 19:11054715  | 0.0261  | 0.00385 | 1.48E-11  |
| SMARCAD1 | 4:95208714   | 0.0713  | 0.00378 | 4.42E-77  |
| SMARCAL1 | 2:217275483  | -0.0294 | 0.00331 | 8.82E-19  |

|          |              |         |         |           |
|----------|--------------|---------|---------|-----------|
| SMARCB1  | 22:24180449  | 0.0612  | 0.00661 | 2.85E-20  |
| SMARCD2  | 17:61887693  | 0.0272  | 0.00266 | 2.57E-24  |
| SMARCE1  | 17:38782343  | 0.0986  | 0.0042  | 3.43E-116 |
| SMC1B    | 22:45818758  | -0.0641 | 0.00318 | 5.65E-87  |
| SMC2     | 9:106849347  | 0.0497  | 0.00554 | 3.82E-19  |
| SMC4     | 3:160161111  | -0.0386 | 0.0049  | 3.97E-15  |
| SMC6     | 2:17981258   | 0.0439  | 0.00534 | 2.28E-16  |
| SMCR8    | 17:18205750  | -0.049  | 0.00455 | 8.54E-27  |
| SMG1     | 16:18936355  | 0.0727  | 0.00464 | 3.26E-54  |
| SMG5     | 1:156208230  | 0.122   | 0.00251 | <1.0E-314 |
| SMG7     | 1:183570545  | -0.0207 | 0.00303 | 9.22E-12  |
| SMG8     | 17:57339990  | -0.041  | 0.00653 | 3.72E-10  |
| SMIM11   | 21:35741702  | -0.0995 | 0.0159  | 3.86E-10  |
| SMIM7    | 19:16807428  | 0.0812  | 0.0114  | 1.16E-12  |
| SMIM8    | 6:88043372   | 0.16    | 0.0058  | 9.82E-156 |
| SMNDC1   | 10:112053599 | 0.0531  | 0.0035  | 7.14E-51  |
| SMOX     | 20:4157072   | 0.116   | 0.0068  | 7.38E-64  |
| SMPD2    | 6:109736614  | -0.0402 | 0.00361 | 1.46E-28  |
| SMPDL3A  | 6:123065057  | -0.142  | 0.0115  | 1.28E-34  |
| SMUG1    | 12:54573816  | 0.039   | 0.00633 | 7.41E-10  |
| SMURF1   | 7:98678486   | -0.055  | 0.00868 | 2.62E-10  |
| SMURF2   | 17:62569580  | -0.0729 | 0.01    | 4.37E-13  |
| SMYD2    | 1:214497080  | 0.0861  | 0.00384 | 1.10E-106 |
| SMYD3    | 1:246670297  | -0.0296 | 0.00444 | 2.86E-11  |
| SMYD4    | 17:1696244   | 0.0403  | 0.00341 | 7.42E-32  |
| SNAP29   | 22:21293653  | 0.0976  | 0.00879 | 2.41E-28  |
| SNAP91   | 6:84320225   | -0.816  | 0.0512  | 8.63E-56  |
| SNAPC1   | 14:62275354  | -0.14   | 0.00512 | 1.95E-154 |
| SNAPC3   | 9:15434792   | 0.0735  | 0.00563 | 2.27E-38  |
| SNAPIN   | 1:153635425  | -0.0337 | 0.00496 | 1.28E-11  |
| SNCA     | 4:90757840   | -0.0865 | 0.00759 | 9.55E-30  |
| SND1-IT1 | 7:127643968  | -0.127  | 0.0152  | 9.90E-17  |
| SNF8     | 17:47006493  | 0.0264  | 0.00422 | 4.61E-10  |
| SNIP1    | 1:38047385   | 0.0382  | 0.00471 | 6.43E-16  |
| SNRNP25  | 16:145884    | 0.127   | 0.0159  | 1.83E-15  |
| SNRNP27  | 2:70141519   | -0.0459 | 0.00451 | 3.69E-24  |
| SNRNP40  | 1:31761703   | 0.0644  | 0.00875 | 2.21E-13  |
| SNRNP48  | 6:7576368    | -0.0406 | 0.00417 | 3.03E-22  |
| SNRPB    | 20:2457887   | -0.0435 | 0.00481 | 2.36E-19  |

|         |              |         |         |           |
|---------|--------------|---------|---------|-----------|
| SNRPB2  | 20:16710791  | 0.0832  | 0.014   | 2.80E-09  |
| SNRPC   | 6:34748893   | 0.0524  | 0.00623 | 5.66E-17  |
| SNRPD3  | 22:24935250  | -0.0932 | 0.00397 | 3.16E-116 |
| SNRPN   | 15:25217611  | 0.112   | 0.00388 | 5.64E-170 |
| SNTB2   | 16:69194699  | -0.0395 | 0.00431 | 7.81E-20  |
| SNUPN   | 15:75863915  | -0.0529 | 0.00891 | 2.96E-09  |
| SNW1    | 14:78202777  | -0.0839 | 0.00868 | 6.10E-22  |
| SNX1    | 15:64441179  | -0.0433 | 0.00437 | 6.65E-23  |
| SNX11   | 17:46178674  | 0.0689  | 0.00374 | 2.77E-73  |
| SNX16   | 8:82720700   | -0.187  | 0.00492 | 9.53E-280 |
| SNX18   | 5:53815722   | -0.122  | 0.00435 | 3.84E-160 |
| SNX19   | 11:130749351 | -0.0924 | 0.00294 | 2.68E-199 |
| SNX2    | 5:122209192  | -0.0289 | 0.00393 | 2.11E-13  |
| SNX20   | 16:50703698  | 0.136   | 0.0192  | 1.51E-12  |
| SNX25   | 4:186172793  | -0.112  | 0.00463 | 1.20E-121 |
| SNX32   | 11:65623739  | -0.0504 | 0.00316 | 3.41E-56  |
| SNX4    | 3:125197161  | -0.0831 | 0.00612 | 2.66E-41  |
| SNX6    | 14:35105227  | -0.156  | 0.00482 | 2.28E-209 |
| SNX7    | 1:99127205   | -0.151  | 0.0126  | 1.09E-32  |
| SOAT1   | 1:179312235  | 0.0762  | 0.00387 | 3.06E-83  |
| SOCS5   | 2:46947440   | 0.089   | 0.006   | 1.00E-48  |
| SOD2    | 6:160087409  | 0.115   | 0.00518 | 3.42E-105 |
| SOGA3   | 6:127889330  | -0.0276 | 0.00406 | 1.11E-11  |
| SOHLH2  | 13:36830298  | -0.058  | 0.00562 | 1.06E-24  |
| SORCS3  | 10:106740404 | -0.0671 | 0.00735 | 9.04E-20  |
| SORT1   | 1:109851126  | 0.034   | 0.00519 | 6.77E-11  |
| SOS2    | 14:50712797  | -0.0738 | 0.00636 | 1.06E-30  |
| SP110   | 2:231042276  | 0.0361  | 0.00471 | 2.17E-14  |
| SP140   | 2:231091223  | 0.0565  | 0.00731 | 1.26E-14  |
| SP140L  | 2:231265405  | 0.0748  | 0.00456 | 3.87E-59  |
| SP2     | 17:45974285  | -0.0196 | 0.00313 | 3.96E-10  |
| SPAG1   | 8:101214189  | -0.0948 | 0.00315 | 4.02E-184 |
| SPAG7   | 17:4865928   | -0.117  | 0.00632 | 3.95E-74  |
| SPAG8   | 9:35808334   | -0.0659 | 0.0103  | 1.65E-10  |
| SPAG9   | 17:49054439  | -0.026  | 0.00429 | 1.49E-09  |
| SPATA13 | 13:24877550  | 0.0649  | 0.00366 | 2.62E-68  |
| SPATA20 | 17:48616114  | -0.153  | 0.00376 | <1.0E-314 |
| SPATA32 | 17:43335413  | 0.0359  | 0.00493 | 3.78E-13  |
| SPATA5  | 4:124024947  | -0.0282 | 0.0043  | 6.40E-11  |

|          |              |         |         |           |
|----------|--------------|---------|---------|-----------|
| SPATA5L1 | 15:45644685  | -0.181  | 0.00448 | <1.0E-314 |
| SPATA6   | 1:48739068   | 0.0798  | 0.00931 | 1.36E-17  |
| SPATA6L  | 9:4661019    | 0.0616  | 0.00367 | 2.18E-61  |
| SPATA7   | 14:88950847  | 0.157   | 0.00429 | 1.58E-260 |
| SPATA9   | 5:94965599   | -0.0714 | 0.00393 | 1.60E-71  |
| SPATS2L  | 2:201163239  | -0.0487 | 0.00735 | 3.79E-11  |
| SPCS3    | 4:177256937  | -0.0744 | 0.00577 | 1.44E-37  |
| SPDL1    | 5:168970932  | 0.206   | 0.0108  | 1.08E-78  |
| SPECC1   | 17:19980772  | 0.0626  | 0.00645 | 4.48E-22  |
| SPECC1L  | 22:24844883  | -0.112  | 0.00869 | 1.80E-37  |
| SPEF2    | 5:35656945   | -0.023  | 0.00301 | 2.69E-14  |
| SPG20    | 13:36886170  | -0.158  | 0.00437 | 2.20E-256 |
| SPHK1    | 17:74378242  | -0.0457 | 0.0078  | 4.96E-09  |
| SPICE1   | 3:113190164  | 0.083   | 0.00823 | 9.55E-24  |
| SPINT2   | 19:38754948  | 0.0323  | 0.00428 | 5.08E-14  |
| SPNS3    | 17:4386669   | 0.0285  | 0.00262 | 2.51E-27  |
| SPOCK2   | 10:73823298  | -0.0385 | 0.00318 | 2.60E-33  |
| SPON1    | 11:14309434  | 0.0203  | 0.00297 | 8.86E-12  |
| SPOP     | 17:47718188  | 0.0216  | 0.00318 | 1.36E-11  |
| SPP1     | 4:88897106   | 0.181   | 0.0065  | 3.99E-159 |
| SPPL3    | 12:121215911 | -0.0249 | 0.00337 | 1.66E-13  |
| SPRED2   | 2:65684152   | 0.0186  | 0.00314 | 3.46E-09  |
| SPRTN    | 1:231484361  | -0.0738 | 0.00397 | 8.50E-75  |
| SPSB1    | 1:9347552    | -0.0252 | 0.00318 | 2.33E-15  |
| SPSB2    | 12:7017043   | -0.052  | 0.0053  | 1.74E-22  |
| SPSB3    | 16:1827836   | -0.037  | 0.00449 | 2.15E-16  |
| SPTBN1   | 2:54787592   | -0.17   | 0.00883 | 1.13E-79  |
| SPTLC2   | 14:78023519  | -0.0784 | 0.00419 | 8.09E-76  |
| SPTLC3   | 20:12988132  | 0.0347  | 0.00571 | 1.28E-09  |
| SQLE     | 8:126031754  | -0.0521 | 0.00763 | 9.51E-12  |
| SQRDL    | 15:45922030  | -0.0445 | 0.0055  | 6.71E-16  |
| SQSTM1   | 5:179254340  | -0.0407 | 0.00263 | 7.67E-53  |
| SRA1     | 5:139937146  | 0.0893  | 0.00373 | 1.81E-120 |
| SRBD1    | 2:45817382   | -0.0276 | 0.00448 | 7.87E-10  |
| SRD5A1   | 5:6634631    | -0.0321 | 0.00543 | 3.53E-09  |
| SRD5A3   | 4:56217015   | -0.221  | 0.00684 | 5.61E-210 |
| SREBF1   | 17:17750558  | -0.0192 | 0.00169 | 1.89E-29  |
| SRGAP3   | 3:9290344    | -0.0229 | 0.0038  | 1.97E-09  |
| SRGN     | 10:70805373  | -0.058  | 0.00568 | 3.07E-24  |

|            |              |         |         |           |
|------------|--------------|---------|---------|-----------|
| SRI        | 7:87835469   | -0.0339 | 0.0052  | 7.33E-11  |
| SRP54      | 14:35402379  | -0.0429 | 0.00319 | 1.31E-40  |
| SRP68      | 17:74060687  | -0.0297 | 0.00475 | 4.47E-10  |
| SRP72      | 4:57357244   | 0.134   | 0.0053  | 3.10E-133 |
| SRPK1      | 6:35834129   | -0.0993 | 0.0058  | 4.15E-64  |
| SRPK2      | 7:105017276  | 0.0555  | 0.00628 | 1.39E-18  |
| SRPRB      | 3:133524717  | -0.0449 | 0.00638 | 2.10E-12  |
| SRR        | 17:2203175   | 0.0612  | 0.00451 | 2.67E-41  |
| SRRT       | 7:100486035  | -0.023  | 0.00343 | 2.37E-11  |
| SRSF12     | 6:89788797   | 0.0427  | 0.00405 | 9.94E-26  |
| SRSF3      | 6:36558964   | -0.0474 | 0.00489 | 4.96E-22  |
| SRSF4      | 1:29434780   | -0.0325 | 0.00463 | 2.40E-12  |
| SRSF9      | 12:120901765 | 0.706   | 0.0264  | 7.42E-148 |
| SRXN1      | 20:633149    | 0.106   | 0.00485 | 7.13E-102 |
| SSB        | 2:170661333  | 0.0764  | 0.00903 | 3.22E-17  |
| SSBP2      | 5:80747220   | 0.0352  | 0.00385 | 7.83E-20  |
| SSH1       | 12:109260526 | -0.0369 | 0.00359 | 1.50E-24  |
| SSH2       | 17:28178724  | -0.0852 | 0.00388 | 2.96E-102 |
| SSH3       | 11:67021930  | 0.0957  | 0.0106  | 2.74E-19  |
| SSR1       | 6:7278046    | 0.0295  | 0.00334 | 1.27E-18  |
| SSR3       | 3:156262753  | 0.0666  | 0.00696 | 1.69E-21  |
| SSU72      | 1:1505215    | -0.274  | 0.0192  | 3.80E-45  |
| SSX2IP     | 1:85133731   | 0.126   | 0.00828 | 2.86E-51  |
| ST14       | 11:130019574 | 0.0686  | 0.00583 | 1.65E-31  |
| ST3GAL1    | 8:134552618  | 0.0683  | 0.00538 | 2.19E-36  |
| ST3GAL4    | 11:126181592 | -0.0296 | 0.00418 | 1.57E-12  |
| ST3GAL5    | 2:86094686   | 0.0805  | 0.00527 | 1.95E-51  |
| ST3GAL6    | 3:98492380   | -0.0305 | 0.00504 | 1.59E-09  |
| ST6GAL1    | 3:186739677  | 0.0335  | 0.00535 | 4.51E-10  |
| ST6GALNAC1 | 17:74674556  | -0.045  | 0.00405 | 2.08E-28  |
| ST6GALNAC2 | 17:74595847  | 0.238   | 0.0107  | 5.60E-104 |
| ST6GALNAC3 | 1:76518693   | 0.0636  | 0.00434 | 1.14E-47  |
| ST6GALNAC6 | 9:130668957  | 0.122   | 0.0102  | 8.99E-33  |
| ST7L       | 1:113089006  | 0.0371  | 0.00313 | 5.06E-32  |
| ST8SIA4    | 5:100258523  | 0.129   | 0.0112  | 4.94E-30  |
| STAB1      | 3:52528292   | 0.0733  | 0.00523 | 8.14E-44  |
| STAG3L4    | 7:66767623   | -0.103  | 0.00501 | 9.33E-91  |
| STAM       | 10:17748365  | 0.0604  | 0.00537 | 5.15E-29  |
| STAM2      | 2:153024245  | 0.037   | 0.0032  | 1.41E-30  |

|               |              |         |         |           |
|---------------|--------------|---------|---------|-----------|
| STAMBP        | 2:74057096   | -0.111  | 0.0132  | 4.68E-17  |
| STAMBPL1      | 10:90683124  | 0.0414  | 0.00465 | 6.50E-19  |
| STARD10       | 11:72506324  | -0.0566 | 0.00322 | 2.58E-67  |
| STARD3NL      | 7:38203783   | 0.0838  | 0.00537 | 1.26E-53  |
| STARD4        | 5:110848319  | 0.115   | 0.0076  | 7.58E-51  |
| STARD5        | 15:81607503  | -0.05   | 0.00562 | 7.59E-19  |
| STARD7        | 2:96872400   | 0.0629  | 0.0046  | 7.05E-42  |
| STAT3         | 17:40450170  | 0.0305  | 0.00483 | 2.89E-10  |
| STAT5A        | 17:40456010  | 0.0385  | 0.00373 | 1.11E-24  |
| STAT6         | 12:57489648  | 0.039   | 0.00402 | 4.56E-22  |
| STEAP3        | 2:120016461  | 0.022   | 0.00262 | 5.02E-17  |
| STEAP4        | 7:87859018   | 0.328   | 0.00797 | <1.0E-314 |
| STIM1         | 11:4107584   | 0.0356  | 0.00289 | 2.93E-34  |
| STIM2         | 4:26884408   | 0.0396  | 0.00295 | 2.22E-40  |
| STK10         | 5:171533782  | 0.0945  | 0.00344 | 2.20E-155 |
| STK17B        | 2:197084587  | -0.0287 | 0.00359 | 1.63E-15  |
| STK24         | 13:99236283  | 0.0212  | 0.00301 | 2.03E-12  |
| STK32C        | 10:134073053 | -0.053  | 0.00439 | 3.92E-33  |
| STK33         | 11:8524933   | -0.0662 | 0.0043  | 2.76E-52  |
| STK35         | 20:2127609   | -0.0369 | 0.00373 | 6.38E-23  |
| STK38L        | 12:27363643  | -0.0471 | 0.008   | 4.01E-09  |
| STK39         | 2:169041386  | 0.0671  | 0.00442 | 5.37E-51  |
| STK4          | 20:43713593  | -0.0205 | 0.00266 | 1.64E-14  |
| STOM          | 9:124118776  | -0.077  | 0.0119  | 1.04E-10  |
| STON1-GTF2A1I | 2:48790832   | -0.029  | 0.00308 | 7.38E-21  |
| STOX1         | 10:70599126  | -0.149  | 0.0098  | 2.48E-51  |
| STPG1         | 1:24765537   | -0.0213 | 0.00363 | 4.75E-09  |
| STPG2         | 4:98959282   | 0.0398  | 0.00354 | 5.28E-29  |
| STRADA        | 17:61817048  | -0.0659 | 0.00324 | 2.87E-88  |
| STRN          | 2:37167191   | -0.0265 | 0.00343 | 1.22E-14  |
| STRN3         | 14:31394171  | 0.0566  | 0.00441 | 3.85E-37  |
| STT3A         | 11:125513097 | 0.0602  | 0.00385 | 5.06E-54  |
| STT3B         | 3:31524844   | 0.0496  | 0.00459 | 7.13E-27  |
| STX16         | 20:57249771  | -0.0439 | 0.00625 | 2.35E-12  |
| STX17         | 9:102721679  | -0.041  | 0.00486 | 4.05E-17  |
| STX1A         | 7:73114440   | 0.0196  | 0.0028  | 3.01E-12  |
| STX2          | 12:131319810 | 0.123   | 0.00626 | 1.35E-82  |
| STX4          | 16:31054607  | -0.0548 | 0.00343 | 3.99E-56  |
| STX5          | 11:62640727  | 0.111   | 0.00875 | 2.17E-36  |



|         |              |         |         |           |
|---------|--------------|---------|---------|-----------|
| STX6    | 1:180981800  | 0.0376  | 0.00617 | 1.19E-09  |
| STX7    | 6:132834518  | 0.0429  | 0.00438 | 2.09E-22  |
| STX8    | 17:9334409   | -0.0732 | 0.00633 | 1.54E-30  |
| STXBP1  | 9:130371107  | 0.0242  | 0.0035  | 5.00E-12  |
| STXBP3  | 1:109323270  | 0.0593  | 0.00462 | 3.04E-37  |
| STXBP4  | 17:53045243  | -0.163  | 0.00559 | 7.96E-173 |
| STXBP5  | 6:147640599  | -0.0245 | 0.00386 | 2.29E-10  |
| STYX    | 14:53238046  | 0.162   | 0.0243  | 2.73E-11  |
| STYXL1  | 7:75657553   | -0.262  | 0.00654 | 1.08E-307 |
| SUCLA2  | 13:48519113  | -0.0489 | 0.00622 | 4.66E-15  |
| SUCLG2  | 3:67421182   | -0.0995 | 0.00784 | 2.11E-36  |
| SUCO    | 1:172453840  | -0.0999 | 0.00437 | 2.43E-110 |
| SUDS3   | 12:118854407 | 0.0608  | 0.00581 | 2.15E-25  |
| SUFU    | 10:104382673 | -0.0166 | 0.00237 | 2.54E-12  |
| SUGP1   | 19:19350103  | 0.0301  | 0.00397 | 4.24E-14  |
| SUGT1   | 13:53255012  | 0.0366  | 0.00513 | 1.09E-12  |
| SUGT1P1 | 9:33529314   | -0.132  | 0.0226  | 4.50E-09  |
| SUGT1P3 | 13:41484599  | 0.181   | 0.0274  | 4.31E-11  |
| SULF2   | 20:46356316  | 0.201   | 0.0103  | 1.35E-81  |
| SULT1A1 | 16:28614472  | -0.12   | 0.0106  | 2.37E-29  |
| SULT1B1 | 4:70586672   | 0.0549  | 0.00667 | 2.32E-16  |
| SULT1E1 | 4:70675023   | -0.0229 | 0.003   | 2.44E-14  |
| SUMF1   | 3:4515991    | 0.0477  | 0.00282 | 1.23E-62  |
| SUMO1P1 | 20:52498570  | -0.173  | 0.0128  | 1.37E-40  |
| SUMO3   | 21:46244045  | 0.04    | 0.00628 | 2.20E-10  |
| SUMO4   | 6:149686518  | -0.0709 | 0.00643 | 5.63E-28  |
| SUN2    | 22:39147235  | -0.0329 | 0.00461 | 1.04E-12  |
| SUOX    | 12:56401085  | 0.0694  | 0.00433 | 2.04E-56  |
| SUPT20H | 13:37595173  | 0.201   | 0.00482 | <1.0E-314 |
| SUPT3H  | 6:45275674   | 0.104   | 0.00534 | 5.17E-81  |
| SUPT4H1 | 17:56423114  | 0.0629  | 0.00317 | 2.42E-84  |
| SUPV3L1 | 10:70975053  | -0.0479 | 0.00475 | 1.05E-23  |
| SUSD1   | 9:114937234  | 0.0922  | 0.00413 | 2.93E-105 |
| SUSD3   | 9:95784485   | -0.0187 | 0.00312 | 1.98E-09  |
| SUV39H2 | 10:14951811  | 0.032   | 0.0048  | 3.11E-11  |
| SUZ12P1 | 17:29109927  | 0.0816  | 0.00996 | 3.27E-16  |
| SV2A    | 1:149891323  | -0.16   | 0.0205  | 7.27E-15  |
| SVIL    | 10:30022551  | -0.039  | 0.00359 | 3.34E-27  |
| SWT1    | 1:185194409  | -0.0855 | 0.00716 | 1.78E-32  |

|         |              |         |         |           |
|---------|--------------|---------|---------|-----------|
| SYCP2   | 20:58552237  | -0.204  | 0.0173  | 1.62E-31  |
| SYCP2L  | 6:10850173   | -0.358  | 0.00868 | <1.0E-314 |
| SYCP3   | 12:102090080 | -0.107  | 0.00447 | 1.26E-120 |
| SYK     | 9:93559351   | 0.0709  | 0.00395 | 6.10E-70  |
| SYN3    | 22:32872258  | -0.0138 | 0.00236 | 5.07E-09  |
| SYNE1   | 6:152875862  | -0.0548 | 0.00871 | 3.48E-10  |
| SYNE2   | 14:64278769  | 0.101   | 0.0141  | 7.18E-13  |
| SYNE3   | 14:95981610  | 0.026   | 0.003   | 6.69E-18  |
| SYNGR1  | 22:39751251  | -0.0305 | 0.00348 | 2.76E-18  |
| SYNGR2  | 17:76186187  | 0.0965  | 0.0101  | 2.16E-21  |
| SYNJ2   | 6:158501843  | -0.0528 | 0.00416 | 2.78E-36  |
| SYNJ2BP | 14:70834418  | 0.0844  | 0.0124  | 1.31E-11  |
| SYNM    | 15:99647605  | 0.112   | 0.00338 | 7.44E-220 |
| SYS1    | 20:44012451  | 0.0359  | 0.00415 | 6.81E-18  |
| SYT9    | 11:7526600   | -0.0277 | 0.00277 | 1.78E-23  |
| SYTL2   | 11:85499983  | 0.21    | 0.013   | 1.47E-57  |
| SZRD1   | 1:16664373   | 0.0299  | 0.00438 | 9.30E-12  |
| TAB2    | 6:149611269  | 0.0252  | 0.00409 | 8.55E-10  |
| TAC3    | 12:57404858  | -0.086  | 0.0141  | 9.99E-10  |
| TACC1   | 8:38742856   | 0.0273  | 0.00334 | 3.62E-16  |
| TACC3   | 4:1748216    | 0.0944  | 0.00431 | 1.23E-101 |
| TACSTD2 | 1:58991470   | -0.213  | 0.00503 | <1.0E-314 |
| TADA2A  | 17:35807445  | -0.0861 | 0.0046  | 1.48E-75  |
| TADA3   | 3:9819922    | -0.0476 | 0.00351 | 3.34E-41  |
| TAF10   | 11:6632450   | 0.0678  | 0.00415 | 2.02E-58  |
| TAF11   | 6:34904488   | -0.0478 | 0.00496 | 9.43E-22  |
| TAF13   | 1:109598452  | -0.0953 | 0.0109  | 3.42E-18  |
| TAF1B   | 2:10048233   | 0.144   | 0.00499 | 1.22E-169 |
| TAF1C   | 16:84209184  | 0.0198  | 0.00283 | 3.06E-12  |
| TAF1D   | 11:93422613  | -0.0465 | 0.00401 | 1.37E-30  |
| TAF2    | 8:120821264  | -0.0783 | 0.0032  | 4.30E-125 |
| TAF7    | 5:140685921  | 0.125   | 0.013   | 1.13E-21  |
| TAF8    | 6:42052817   | 0.0491  | 0.00723 | 1.17E-11  |
| TAF9    | 5:68638941   | 0.0572  | 0.00731 | 5.80E-15  |
| TAGAP   | 6:159463452  | 0.0904  | 0.00795 | 1.31E-29  |
| TAGLN   | 11:117070547 | 0.108   | 0.00376 | 3.41E-169 |
| TAGLN2  | 1:159892088  | 0.0588  | 0.00709 | 1.48E-16  |
| TAL1    | 1:47706970   | -0.0436 | 0.00364 | 1.16E-32  |
| TAMM41  | 3:11828825   | -0.265  | 0.00659 | <1.0E-314 |

|          |              |         |         |           |
|----------|--------------|---------|---------|-----------|
| TANGO2   | 22:20066611  | 0.0355  | 0.00447 | 2.33E-15  |
| TANK     | 2:162025322  | 0.179   | 0.00468 | 1.37E-283 |
| TAOK3    | 12:118749798 | -0.0307 | 0.00387 | 2.76E-15  |
| TAP2     | 6:32766496   | 0.0887  | 0.0134  | 4.14E-11  |
| TAPBP    | 6:33283766   | 0.0277  | 0.00289 | 1.22E-21  |
| TAPBPL   | 12:6570821   | -0.0507 | 0.00296 | 2.88E-64  |
| TAPT1    | 4:16155058   | -0.0386 | 0.00383 | 1.36E-23  |
| TARBP1   | 1:234610539  | 0.0403  | 0.00322 | 2.45E-35  |
| TARDBP   | 1:11100898   | -0.0447 | 0.00438 | 3.50E-24  |
| TARP     | 7:38358102   | -0.276  | 0.0126  | 5.82E-102 |
| TARSL2   | 15:102236087 | -0.0288 | 0.00313 | 3.86E-20  |
| TAS2R10  | 12:11028507  | -0.088  | 0.00916 | 1.20E-21  |
| TAS2R13  | 12:11093703  | 0.202   | 0.0123  | 7.91E-59  |
| TAS2R14  | 12:11051749  | -0.236  | 0.0082  | 5.60E-170 |
| TAS2R19  | 12:11170074  | -0.213  | 0.0132  | 7.03E-57  |
| TAS2R20  | 12:11131212  | 0.426   | 0.0105  | <1.0E-314 |
| TAS2R3   | 7:141489866  | -0.0624 | 0.00788 | 3.14E-15  |
| TAS2R31  | 12:11166536  | 0.302   | 0.0124  | 3.71E-124 |
| TAS2R4   | 7:141446818  | -0.16   | 0.0126  | 1.25E-36  |
| TAS2R41  | 7:143126796  | -0.177  | 0.0101  | 1.26E-66  |
| TAS2R46  | 12:11216855  | -0.608  | 0.0221  | 1.37E-155 |
| TAS2R5   | 7:141463914  | -0.104  | 0.0075  | 2.69E-43  |
| TAS2R50  | 12:11138683  | -0.477  | 0.0132  | 1.78E-256 |
| TAS2R60  | 7:143111112  | -0.356  | 0.00888 | 1.45E-306 |
| TATDN2   | 3:10320865   | -0.0467 | 0.00353 | 1.89E-39  |
| TBC1D1   | 4:37966182   | 0.0361  | 0.00332 | 3.92E-27  |
| TBC1D14  | 4:6919674    | 0.0668  | 0.00399 | 2.58E-61  |
| TBC1D15  | 12:72322443  | 0.0682  | 0.00672 | 5.29E-24  |
| TBC1D17  | 19:50370846  | -0.0211 | 0.00311 | 1.38E-11  |
| TBC1D2   | 9:100985826  | -0.0241 | 0.00375 | 1.42E-10  |
| TBC1D20  | 20:416149    | -0.028  | 0.00425 | 4.45E-11  |
| TBC1D22A | 22:47399473  | -0.0211 | 0.00304 | 4.00E-12  |
| TBC1D2B  | 15:78367474  | -0.0435 | 0.00487 | 5.81E-19  |
| TBC1D4   | 13:75884290  | -0.0473 | 0.00332 | 2.75E-45  |
| TBC1D5   | 3:17729450   | -0.0305 | 0.00429 | 1.31E-12  |
| TBC1D7   | 6:13327777   | -0.139  | 0.005   | 2.13E-159 |
| TBC1D8   | 2:101777393  | -0.0665 | 0.00621 | 1.61E-26  |
| TBC1D9B  | 5:179335060  | 0.0525  | 0.00567 | 3.09E-20  |
| TBCB     | 19:36605875  | -0.153  | 0.0242  | 2.40E-10  |

|          |              |         |         |           |
|----------|--------------|---------|---------|-----------|
| TBCD     | 17:80822769  | 0.0227  | 0.00264 | 1.03E-17  |
| TBCE     | 1:235600129  | -0.039  | 0.00406 | 1.08E-21  |
| TBCK     | 4:107251278  | 0.0903  | 0.00416 | 4.50E-100 |
| TBK1     | 12:64845715  | 0.0592  | 0.00748 | 2.81E-15  |
| TBKBP1   | 17:45791123  | -0.0353 | 0.00217 | 5.01E-58  |
| TBP      | 6:170821226  | -0.0483 | 0.00726 | 3.21E-11  |
| TBPL1    | 6:134268822  | 0.11    | 0.00564 | 1.55E-82  |
| TBRG4    | 7:45146584   | -0.0324 | 0.00272 | 2.35E-32  |
| TC2N     | 14:92332548  | -0.0894 | 0.00739 | 3.34E-33  |
| TCAIM    | 3:44408255   | -0.0493 | 0.00607 | 6.33E-16  |
| TCEA3    | 1:23751140   | 0.0841  | 0.00602 | 1.51E-43  |
| TCEB3    | 1:24051614   | 0.0778  | 0.00549 | 1.05E-44  |
| TCERG1   | 5:145855288  | 0.0403  | 0.00407 | 5.28E-23  |
| TCF19    | 6:31123359   | -0.12   | 0.00555 | 5.79E-99  |
| TCF25    | 16:89922485  | -0.0927 | 0.00569 | 2.85E-58  |
| TCF7L1   | 2:85546615   | 0.0288  | 0.00208 | 5.52E-43  |
| TCF7L2   | 10:114711755 | -0.0869 | 0.0065  | 3.79E-40  |
| TCFL5    | 20:61452263  | 0.122   | 0.00922 | 1.61E-39  |
| TCIRG1   | 11:67804156  | 0.0456  | 0.00522 | 2.93E-18  |
| TCL1A    | 14:96162418  | 0.276   | 0.0406  | 1.17E-11  |
| TCL1B    | 14:96104174  | -0.0398 | 0.00638 | 4.87E-10  |
| TCN1     | 11:59570967  | -0.208  | 0.0258  | 9.84E-16  |
| TCN2     | 22:31004127  | -0.0223 | 0.00318 | 2.26E-12  |
| TCP11L1  | 11:33052654  | -0.211  | 0.00522 | <1.0E-314 |
| TCTEX1D2 | 3:196066227  | -0.0649 | 0.00476 | 1.21E-41  |
| TCTN2    | 12:124167006 | -0.0682 | 0.00413 | 1.06E-59  |
| TCTN3    | 10:97374883  | -0.0804 | 0.00799 | 1.26E-23  |
| TDP1     | 14:90422664  | -0.0329 | 0.00381 | 7.90E-18  |
| TDP2     | 6:24650671   | -0.057  | 0.00648 | 1.81E-18  |
| TDRD6    | 6:46618415   | 0.0174  | 0.00291 | 2.43E-09  |
| TDRD7    | 9:100197911  | -0.0408 | 0.0053  | 1.73E-14  |
| TDRD9    | 14:104428576 | -0.219  | 0.00744 | 1.85E-176 |
| TDRKH    | 1:151742105  | 0.0691  | 0.00397 | 3.41E-66  |
| TEAD1    | 11:13010440  | -0.139  | 0.00759 | 1.32E-72  |
| TEC      | 4:48112291   | -0.0675 | 0.00652 | 7.54E-25  |
| TECPR1   | 7:97896175   | 0.0203  | 0.00189 | 1.20E-26  |
| TEDDM1   | 1:182362259  | 0.0934  | 0.00838 | 1.53E-28  |
| TEF      | 22:41777315  | -0.031  | 0.00341 | 1.42E-19  |
| TEK      | 9:27193847   | -0.0931 | 0.00339 | 1.60E-155 |

|           |              |         |         |           |
|-----------|--------------|---------|---------|-----------|
| TEN1      | 17:74015595  | 0.0318  | 0.00382 | 1.04E-16  |
| TEP1      | 14:20881527  | 0.0398  | 0.00299 | 8.91E-40  |
| TES       | 7:115851177  | 0.453   | 0.0212  | 7.33E-97  |
| TESC      | 12:117492691 | -0.133  | 0.014   | 2.78E-21  |
| TESK2     | 1:45954599   | 0.0595  | 0.00411 | 1.16E-46  |
| TESPA1    | 12:55395712  | 0.108   | 0.00905 | 1.58E-32  |
| TEX10     | 9:103108941  | 0.0609  | 0.00494 | 1.94E-34  |
| TEX101    | 19:43870954  | -0.0359 | 0.00566 | 2.23E-10  |
| TEX9      | 15:56746569  | -0.113  | 0.0131  | 8.84E-18  |
| TFAM      | 10:60144073  | -0.133  | 0.00397 | 1.57E-222 |
| TFB1M     | 6:155625104  | -0.112  | 0.00449 | 4.51E-130 |
| TFB2M     | 1:246707709  | -0.0501 | 0.00524 | 1.84E-21  |
| TFDP2     | 3:141742127  | -0.13   | 0.0111  | 5.15E-31  |
| TFEC      | 7:115665688  | 0.0556  | 0.00713 | 7.10E-15  |
| TFG       | 3:100439823  | -0.137  | 0.00358 | 9.77E-284 |
| TFIP11    | 22:26904541  | 0.178   | 0.00424 | <1.0E-314 |
| TFPT      | 19:54625765  | 0.0676  | 0.00506 | 5.28E-40  |
| TFRC      | 3:195835404  | -0.292  | 0.0317  | 3.99E-20  |
| TG        | 8:133877623  | 0.0423  | 0.00188 | 1.08E-106 |
| TGFB2     | 1:218660024  | -0.0567 | 0.00583 | 3.77E-22  |
| TGFBI     | 5:135335229  | 0.0978  | 0.00644 | 5.65E-51  |
| TGFBR1    | 9:101911125  | 0.0562  | 0.00466 | 4.57E-33  |
| TGFBR2    | 3:30690393   | -0.0788 | 0.00492 | 2.74E-56  |
| TGFBRAP1  | 2:105897519  | -0.0408 | 0.00622 | 5.83E-11  |
| TGM3      | 20:2281284   | 0.0557  | 0.00417 | 5.68E-40  |
| TGOLN2    | 2:85542686   | 0.0583  | 0.00347 | 1.34E-61  |
| TGS1      | 8:56685933   | 0.057   | 0.00534 | 2.50E-26  |
| TH1L      | 20:57564695  | 0.108   | 0.00761 | 1.09E-44  |
| THADA     | 2:43732347   | 0.019   | 0.00253 | 7.58E-14  |
| THAP7-AS1 | 22:21366206  | 0.0836  | 0.0082  | 3.62E-24  |
| THBD      | 20:23078996  | 0.196   | 0.00721 | 8.73E-153 |
| THBS3     | 1:155184975  | 0.1     | 0.00412 | 7.03E-124 |
| THEM4     | 1:151865858  | 0.1     | 0.0138  | 4.87E-13  |
| THEMIS2   | 1:28209362   | 0.198   | 0.00501 | 1.29E-299 |
| THG1L     | 5:157160630  | -0.0783 | 0.0111  | 1.52E-12  |
| THNSL1    | 10:25332461  | -0.0357 | 0.00564 | 2.61E-10  |
| THNSL2    | 2:88453718   | -0.102  | 0.00435 | 5.27E-116 |
| THOC5     | 22:29933627  | 0.0265  | 0.00395 | 2.13E-11  |
| THOC7     | 3:63842629   | -0.0818 | 0.00654 | 2.20E-35  |

|         |              |         |         |           |
|---------|--------------|---------|---------|-----------|
| THRA    | 17:38252660  | -0.0714 | 0.00745 | 1.52E-21  |
| THRAP3  | 1:36791837   | 0.0513  | 0.00601 | 1.79E-17  |
| THUMPD1 | 16:20745255  | 0.03    | 0.00425 | 2.03E-12  |
| THUMPD2 | 2:40006430   | 0.0444  | 0.00345 | 1.96E-37  |
| THUMPD3 | 3:9438746    | 0.0884  | 0.00381 | 3.05E-113 |
| TIAL1   | 10:121392582 | -0.0427 | 0.00637 | 2.16E-11  |
| TIAM1   | 21:32817485  | 0.101   | 0.00471 | 2.08E-97  |
| TIAM2   | 6:155601105  | -0.749  | 0.0236  | 1.62E-201 |
| TIFA    | 4:113196906  | -0.0716 | 0.00534 | 2.55E-40  |
| TIGD2   | 4:90040847   | 0.0972  | 0.0103  | 4.71E-21  |
| TIGD7   | 16:3338167   | -0.0506 | 0.00624 | 5.64E-16  |
| TIGIT   | 3:114013479  | -0.0415 | 0.00617 | 1.99E-11  |
| TIMD4   | 5:156435250  | -0.0665 | 0.00665 | 2.18E-23  |
| TIMM10  | 11:57283988  | -0.286  | 0.00718 | 3.97E-303 |
| TIMM13  | 19:2418264   | -0.149  | 0.00762 | 5.19E-82  |
| TIMM21  | 18:71814750  | -0.0787 | 0.0125  | 3.29E-10  |
| TIMM44  | 19:7999372   | -0.0412 | 0.00665 | 6.22E-10  |
| TIMMDC1 | 3:119236179  | 0.148   | 0.0112  | 2.85E-39  |
| TIMP2   | 17:76907666  | 0.113   | 0.00639 | 2.08E-68  |
| TIPARP  | 3:156425057  | 0.0611  | 0.0101  | 1.43E-09  |
| TIPIN   | 15:66625724  | 0.297   | 0.0114  | 1.43E-140 |
| TIPRL   | 1:168137725  | 0.0952  | 0.00877 | 3.55E-27  |
| TIRAP   | 11:126133182 | 0.0437  | 0.00361 | 3.33E-33  |
| TJP2    | 9:71787927   | 0.112   | 0.0032  | 4.62E-243 |
| TJP3    | 19:3749971   | -0.0162 | 0.00199 | 4.29E-16  |
| TK2     | 16:66583994  | -0.498  | 0.0125  | 8.23E-303 |
| TKT     | 3:53286932   | 0.111   | 0.00446 | 5.07E-130 |
| TLE3    | 15:70349578  | -0.0317 | 0.0035  | 2.13E-19  |
| TLK1    | 2:172031967  | 0.0426  | 0.00667 | 1.87E-10  |
| TLR1    | 4:38802913   | 0.217   | 0.00736 | 2.33E-177 |
| TLR10   | 4:38773109   | 0.129   | 0.00734 | 1.23E-67  |
| TLR4    | 9:120463139  | 0.159   | 0.00591 | 1.41E-149 |
| TLR5    | 1:223282292  | 0.128   | 0.00711 | 4.91E-70  |
| TLR6    | 4:38880313   | -0.11   | 0.00636 | 2.10E-65  |
| TM2D1   | 1:62189541   | -0.0528 | 0.00546 | 6.12E-22  |
| TM2D2   | 8:38841052   | -0.0448 | 0.00481 | 1.77E-20  |
| TM2D3   | 15:102225621 | 0.0621  | 0.00365 | 3.60E-63  |
| TM6SF1  | 15:83762285  | -0.0778 | 0.00588 | 2.29E-39  |
| TM7SF3  | 12:27103588  | -0.0366 | 0.00569 | 1.39E-10  |

|          |              |         |         |           |
|----------|--------------|---------|---------|-----------|
| TM9SF1   | 14:24636025  | -0.0333 | 0.00476 | 2.72E-12  |
| TM9SF3   | 10:98357129  | 0.0323  | 0.00451 | 9.69E-13  |
| TM9SF4   | 20:30770988  | 0.0244  | 0.00305 | 1.39E-15  |
| TMA16    | 4:164418356  | 0.0795  | 0.00481 | 6.32E-60  |
| TMBIM1   | 2:219133137  | 0.0767  | 0.00364 | 8.37E-95  |
| TMBIM4   | 12:66510122  | 0.0314  | 0.00316 | 5.34E-23  |
| TMC4     | 19:54674742  | 0.0969  | 0.00646 | 8.77E-50  |
| TMC5     | 16:19486687  | 0.0347  | 0.00372 | 1.46E-20  |
| TMC8     | 17:76135412  | 0.0275  | 0.00392 | 2.58E-12  |
| TMCC3    | 12:95074582  | 0.0577  | 0.00629 | 6.33E-20  |
| TMCO3    | 13:114175004 | -0.0549 | 0.00408 | 1.26E-40  |
| TMED2    | 12:124080619 | -0.042  | 0.00409 | 1.89E-24  |
| TMED5    | 1:93673898   | 0.0288  | 0.00454 | 2.41E-10  |
| TMED6    | 16:69377553  | 0.0507  | 0.00577 | 2.00E-18  |
| TMEFF1   | 9:103189338  | 0.0351  | 0.00478 | 2.59E-13  |
| TMEM101  | 17:42071537  | 0.0641  | 0.00894 | 8.32E-13  |
| TMEM106B | 7:12257169   | -0.0904 | 0.00382 | 6.31E-118 |
| TMEM106C | 12:48358279  | -0.0601 | 0.00422 | 4.61E-45  |
| TMEM109  | 11:60667504  | -0.0325 | 0.00315 | 1.29E-24  |
| TMEM110  | 3:52871929   | -0.0469 | 0.00477 | 1.41E-22  |
| TMEM116  | 12:112446710 | -0.0842 | 0.00797 | 8.55E-26  |
| TMEM119  | 12:108987230 | -0.0971 | 0.0126  | 1.70E-14  |
| TMEM123  | 11:102322459 | -0.134  | 0.0207  | 8.87E-11  |
| TMEM127  | 2:96917588   | 0.0318  | 0.00331 | 1.09E-21  |
| TMEM135  | 11:86933855  | 0.0467  | 0.00755 | 6.71E-10  |
| TMEM140  | 7:134855725  | -0.0459 | 0.00546 | 5.56E-17  |
| TMEM144  | 4:159092633  | 0.242   | 0.00786 | 3.12E-191 |
| TMEM147  | 19:36038390  | 0.0345  | 0.00394 | 2.69E-18  |
| TMEM14A  | 6:52535274   | 0.0572  | 0.007   | 3.84E-16  |
| TMEM14E  | 3:152094201  | 0.0466  | 0.00519 | 3.58E-19  |
| TMEM154  | 4:153619325  | -0.146  | 0.0186  | 5.84E-15  |
| TMEM156  | 4:39036648   | 0.133   | 0.0117  | 1.19E-29  |
| TMEM158  | 3:45280071   | 0.0241  | 0.00391 | 7.25E-10  |
| TMEM159  | 16:21192098  | -0.0751 | 0.00618 | 1.58E-33  |
| TMEM163  | 2:135206340  | 0.0558  | 0.00825 | 1.53E-11  |
| TMEM165  | 4:56331332   | -0.0589 | 0.00401 | 6.35E-48  |
| TMEM169  | 2:216955910  | -0.0297 | 0.00437 | 1.19E-11  |
| TMEM170A | 16:75477714  | -0.0648 | 0.00764 | 3.02E-17  |
| TMEM171  | 5:72367166   | 0.0594  | 0.0066  | 3.01E-19  |

|          |              |         |         |           |
|----------|--------------|---------|---------|-----------|
| TMEM176A | 7:150457308  | -0.874  | 0.00868 | <1.0E-314 |
| TMEM176B | 7:150455295  | 0.664   | 0.0159  | <1.0E-314 |
| TMEM18   | 2:677213     | 0.0317  | 0.00419 | 4.66E-14  |
| TMEM180  | 10:104237007 | 0.0438  | 0.00262 | 6.58E-61  |
| TMEM184B | 22:38622598  | 0.048   | 0.0045  | 3.02E-26  |
| TMEM185B | 2:121012836  | -0.0534 | 0.00736 | 4.72E-13  |
| TMEM189  | 20:48757132  | 0.0212  | 0.00268 | 3.24E-15  |
| TMEM199  | 17:26670627  | 0.0563  | 0.00417 | 7.44E-41  |
| TMEM2    | 9:74377528   | -0.054  | 0.00698 | 1.17E-14  |
| TMEM204  | 16:1583634   | -0.15   | 0.00523 | 7.78E-169 |
| TMEM205  | 19:11431901  | -0.0975 | 0.0108  | 3.29E-19  |
| TMEM206  | 1:212521242  | -0.0304 | 0.00428 | 1.29E-12  |
| TMEM209  | 7:129861638  | 0.132   | 0.00857 | 3.79E-52  |
| TMEM216  | 11:61165280  | -0.0871 | 0.00653 | 6.67E-40  |
| TMEM220  | 17:10618661  | -0.115  | 0.00443 | 6.65E-141 |
| TMEM241  | 18:21043106  | -0.0236 | 0.00399 | 3.40E-09  |
| TMEM242  | 6:157707709  | -0.181  | 0.0129  | 2.84E-44  |
| TMEM245  | 9:111889172  | -0.102  | 0.00451 | 1.82E-107 |
| TMEM252  | 9:71175565   | -0.185  | 0.00816 | 5.21E-109 |
| TMEM254  | 10:81830894  | -0.0509 | 0.00556 | 7.38E-20  |
| TMEM258  | 11:61560081  | -0.186  | 0.00472 | 1.97E-298 |
| TMEM30A  | 6:76004562   | 0.0396  | 0.00394 | 1.20E-23  |
| TMEM33   | 4:41960607   | 0.0726  | 0.00749 | 4.73E-22  |
| TMEM43   | 3:14167761   | 0.0264  | 0.00391 | 1.53E-11  |
| TMEM45A  | 3:100211602  | 0.0502  | 0.00451 | 2.03E-28  |
| TMEM45B  | 11:129702471 | 0.281   | 0.0093  | 8.60E-185 |
| TMEM50B  | 21:34842725  | -0.127  | 0.00376 | 8.79E-225 |
| TMEM51   | 1:15462172   | -0.0718 | 0.00476 | 2.02E-50  |
| TMEM55A  | 8:91959989   | 0.0292  | 0.00494 | 3.66E-09  |
| TMEM60   | 7:77397379   | -0.064  | 0.00497 | 2.18E-37  |
| TMEM62   | 15:43510025  | 0.0441  | 0.00742 | 2.89E-09  |
| TMEM65   | 8:125287350  | -0.0351 | 0.00528 | 3.16E-11  |
| TMEM66   | 8:29927856   | -0.0471 | 0.00323 | 1.97E-47  |
| TMEM68   | 8:56660888   | 0.0325  | 0.00533 | 1.16E-09  |
| TMEM70   | 8:74888049   | 0.0263  | 0.00408 | 1.27E-10  |
| TMEM71   | 8:133715804  | -0.0835 | 0.00466 | 9.28E-70  |
| TMEM80   | 11:695842    | -0.118  | 0.00602 | 2.30E-82  |
| TMEM81   | 1:205039288  | 0.0435  | 0.00661 | 5.03E-11  |
| TMEM87B  | 2:112803111  | 0.116   | 0.00471 | 8.89E-126 |



|                |              |         |         |           |
|----------------|--------------|---------|---------|-----------|
| TMEM8A         | 16:430469    | 0.135   | 0.00479 | 7.43E-162 |
| TMEM9          | 1:201125326  | -0.032  | 0.00315 | 4.93E-24  |
| TMEM91         | 19:41888850  | 0.198   | 0.016   | 1.24E-34  |
| TMEM92         | 17:48360903  | 0.0844  | 0.012   | 2.32E-12  |
| TMEM97         | 17:26688663  | 0.0615  | 0.00569 | 5.80E-27  |
| TMEM98         | 17:31298330  | -0.0742 | 0.00759 | 2.11E-22  |
| TMEM99         | 17:39006842  | -0.0975 | 0.00701 | 2.89E-43  |
| TMEM9B         | 11:9010134   | 0.159   | 0.00838 | 3.95E-78  |
| TMOD2          | 15:52048251  | -0.118  | 0.00537 | 5.16E-103 |
| TMOD3          | 15:52076222  | 0.0698  | 0.00859 | 5.64E-16  |
| TMPRSS11D      | 4:68688583   | -0.315  | 0.0251  | 1.18E-35  |
| TMPRSS3        | 21:43824106  | 0.0258  | 0.00279 | 2.88E-20  |
| TMSB10         | 2:85133320   | 0.0742  | 0.00791 | 9.09E-21  |
| TMTC1          | 12:29905322  | -0.392  | 0.00708 | <1.0E-314 |
| TMTC2          | 12:83328642  | -0.043  | 0.00635 | 1.39E-11  |
| TMTC3          | 12:88639690  | -0.175  | 0.0201  | 4.66E-18  |
| TMTC4          | 13:101344407 | -0.109  | 0.00363 | 1.82E-181 |
| TMX1           | 14:51720038  | -0.0758 | 0.00469 | 2.09E-57  |
| TMX3           | 18:66391816  | -0.0596 | 0.00565 | 8.87E-26  |
| TMX4           | 20:7980390   | 0.0956  | 0.00496 | 4.09E-80  |
| TNF            | 6:31536224   | -0.0421 | 0.00393 | 1.35E-26  |
| TNFAIP2        | 14:103606468 | 0.0392  | 0.00539 | 3.85E-13  |
| TNFAIP6        | 2:152164587  | -0.292  | 0.0102  | 1.07E-168 |
| TNFAIP8        | 5:118717753  | 0.0599  | 0.00406 | 2.90E-48  |
| TNFRSF10A      | 8:23082971   | 0.0329  | 0.00497 | 4.13E-11  |
| TNFRSF10B      | 8:22941923   | -0.125  | 0.00396 | 1.05E-201 |
| TNFRSF10C      | 8:22957606   | 0.125   | 0.0068  | 7.35E-73  |
| TNFRSF13C      | 22:42337040  | -0.0521 | 0.00721 | 5.80E-13  |
| TNFRSF17       | 16:12071341  | 0.114   | 0.0129  | 1.52E-18  |
| TNFRSF1A       | 12:6445329   | 0.0712  | 0.00392 | 2.02E-71  |
| TNFRSF1B       | 1:12243654   | 0.0274  | 0.0039  | 2.52E-12  |
| TNFRSF9        | 1:8002098    | 0.108   | 0.0126  | 8.26E-18  |
| TNFSF12-TNFSF1 | 17:7460517   | -0.0551 | 0.00374 | 3.17E-48  |
| TNFSF13B       | 13:108916613 | 0.286   | 0.0334  | 1.59E-17  |
| TNFSF14        | 19:6669934   | -0.148  | 0.00889 | 1.49E-60  |
| TNFSF15        | 9:117568766  | -0.0523 | 0.00508 | 1.29E-24  |
| TNFSF4         | 1:173162218  | 0.178   | 0.00927 | 1.25E-79  |
| TNFSF8         | 9:117624799  | 0.0942  | 0.00592 | 1.12E-55  |
| TNIP1          | 5:150436158  | 0.0271  | 0.00397 | 9.47E-12  |

|          |              |         |         |           |
|----------|--------------|---------|---------|-----------|
| TNKS2    | 10:93650630  | -0.0386 | 0.00422 | 8.08E-20  |
| TNNC2    | 20:44423843  | -0.059  | 0.00539 | 1.26E-27  |
| TNNI3    | 19:55672784  | -0.0612 | 0.00942 | 8.95E-11  |
| TNNI3K   | 1:74689511   | -0.0272 | 0.00286 | 3.07E-21  |
| TNNT1    | 19:55690751  | -0.334  | 0.0206  | 1.14E-57  |
| TNNT3    | 11:1942575   | 0.0979  | 0.0063  | 2.30E-53  |
| TNPO1    | 5:72124610   | 0.0254  | 0.00404 | 3.62E-10  |
| TNPO3    | 7:128723327  | 0.0978  | 0.0038  | 1.03E-137 |
| TNRC6A   | 16:24842933  | 0.046   | 0.00596 | 1.32E-14  |
| TNS1     | 2:218710924  | -0.0394 | 0.0051  | 1.36E-14  |
| TNS3     | 7:47319723   | -0.0207 | 0.00249 | 9.23E-17  |
| TOB1     | 17:48973032  | 0.0503  | 0.00475 | 6.72E-26  |
| TOB2     | 22:41850500  | 0.0271  | 0.00408 | 3.65E-11  |
| TOM1     | 22:35707236  | 0.0736  | 0.00296 | 6.95E-129 |
| TOM1L2   | 17:17848602  | 0.0299  | 0.00445 | 2.00E-11  |
| TOMM34   | 20:43589041  | 0.109   | 0.00648 | 2.11E-61  |
| TOMM40L  | 1:161179877  | 0.0299  | 0.00411 | 3.86E-13  |
| TOMM7    | 7:22848987   | -0.0577 | 0.00413 | 1.31E-43  |
| TOP1MT   | 8:144404964  | 0.0579  | 0.00888 | 7.53E-11  |
| TOP3B    | 22:22301254  | 0.0342  | 0.00417 | 2.95E-16  |
| TOR1A    | 9:132557210  | 0.0524  | 0.00368 | 3.69E-45  |
| TOR1AIP1 | 1:179858333  | -0.0455 | 0.00346 | 7.24E-39  |
| TOR1B    | 9:132568500  | 0.173   | 0.00517 | 1.35E-223 |
| TOX      | 8:60078682   | -0.085  | 0.00766 | 2.73E-28  |
| TOX4     | 14:21946473  | -0.0368 | 0.00402 | 7.93E-20  |
| TP53BP2  | 1:223954617  | 0.0472  | 0.00545 | 5.85E-18  |
| TP53I3   | 2:24347093   | 0.0874  | 0.00539 | 7.60E-58  |
| TP53INP1 | 8:95966531   | -0.0351 | 0.00395 | 8.43E-19  |
| TPCN2    | 11:68863048  | 0.0287  | 0.00246 | 4.78E-31  |
| TPD52    | 8:81049437   | 0.0732  | 0.00488 | 8.88E-50  |
| TPGS2    | 18:34324376  | 0.139   | 0.00903 | 1.85E-52  |
| TPI1     | 12:7014962   | -0.252  | 0.0147  | 7.11E-64  |
| TPK1     | 7:144547618  | 0.113   | 0.0045  | 1.28E-131 |
| TPM1     | 15:63338457  | 0.157   | 0.00847 | 3.45E-74  |
| TPM2     | 9:35693121   | 0.208   | 0.00622 | 5.03E-222 |
| TPMT     | 6:18117868   | -0.068  | 0.00941 | 5.63E-13  |
| TPP2     | 13:103284767 | -0.0249 | 0.00308 | 7.96E-16  |
| TPRG1    | 3:188868715  | 0.15    | 0.0116  | 7.87E-38  |
| TPRG1L   | 1:3563428    | 0.101   | 0.00666 | 2.65E-51  |

|          |              |         |         |           |
|----------|--------------|---------|---------|-----------|
| TPST1    | 7:65823230   | 0.228   | 0.0103  | 2.99E-104 |
| TPST2    | 22:27033321  | 0.0249  | 0.0036  | 4.63E-12  |
| TPX2     | 20:30351560  | 0.0377  | 0.00427 | 1.57E-18  |
| TRABD    | 22:50619920  | -0.0427 | 0.00409 | 3.39E-25  |
| TRAF3    | 14:103243408 | 0.0356  | 0.00387 | 5.22E-20  |
| TRAF3IP1 | 2:239235857  | -0.0255 | 0.00381 | 2.27E-11  |
| TRAF3IP2 | 6:111904737  | 0.0254  | 0.0031  | 2.99E-16  |
| TRAF3IP3 | 1:209930585  | 0.0831  | 0.00379 | 2.64E-102 |
| TRAF5    | 1:211530044  | -0.0349 | 0.00456 | 2.54E-14  |
| TRAK1    | 3:42231638   | -0.0335 | 0.00361 | 2.87E-20  |
| TRAM1    | 8:71489682   | 0.0513  | 0.00381 | 9.16E-41  |
| TRAM2    | 6:52442880   | -0.0295 | 0.00407 | 4.58E-13  |
| TRAP1    | 16:3743046   | 0.0838  | 0.00347 | 2.44E-122 |
| TRAPPC10 | 21:45416953  | 0.0301  | 0.00427 | 2.08E-12  |
| TRAPPC11 | 4:184636217  | 0.0271  | 0.00324 | 7.23E-17  |
| TRAPPC12 | 2:3487331    | -0.0399 | 0.00497 | 1.10E-15  |
| TRAPPC2L | 16:88919457  | 0.0437  | 0.0052  | 5.81E-17  |
| TRAPPC4  | 11:118880668 | -0.113  | 0.00563 | 4.34E-87  |
| TRAPPC6B | 14:39587438  | 0.0433  | 0.00593 | 3.10E-13  |
| TRAPPC8  | 18:29432624  | 0.0291  | 0.00282 | 1.13E-24  |
| TRAPPC9  | 8:141488651  | 0.114   | 0.00584 | 1.08E-81  |
| TRAT1    | 3:108530225  | -0.0823 | 0.00981 | 6.24E-17  |
| TRDMT1   | 10:17237954  | 0.125   | 0.00544 | 6.78E-111 |
| TREM1    | 6:41239936   | 0.328   | 0.0113  | 2.75E-172 |
| TREML2   | 6:41163700   | -0.0342 | 0.00421 | 5.39E-16  |
| TREML4   | 6:41183349   | -0.447  | 0.00852 | <1.0E-314 |
| TRERF1   | 6:42190556   | -0.281  | 0.00842 | 2.95E-221 |
| TRIB2    | 2:12858078   | -0.0656 | 0.00538 | 9.03E-34  |
| TRIM10   | 6:30122657   | 0.0977  | 0.00869 | 5.47E-29  |
| TRIM13   | 13:50590291  | 0.0312  | 0.00499 | 4.27E-10  |
| TRIM14   | 9:100862339  | 0.0719  | 0.00653 | 6.60E-28  |
| TRIM2    | 4:154142936  | -0.0258 | 0.00401 | 1.34E-10  |
| TRIM21   | 11:4422642   | -0.0409 | 0.00525 | 7.53E-15  |
| TRIM22   | 11:5721286   | 0.0497  | 0.00736 | 1.53E-11  |
| TRIM26   | 6:30163955   | -0.0708 | 0.00368 | 9.52E-80  |
| TRIM27   | 6:28891458   | -0.0811 | 0.00307 | 1.55E-144 |
| TRIM32   | 9:119471408  | 0.04    | 0.00576 | 4.03E-12  |
| TRIM33   | 1:115084850  | -0.121  | 0.0147  | 2.16E-16  |
| TRIM35   | 8:27168902   | 0.0372  | 0.00278 | 4.53E-40  |

|              |              |         |         |           |
|--------------|--------------|---------|---------|-----------|
| TRIM36       | 5:114542108  | -0.0359 | 0.00365 | 1.36E-22  |
| TRIM37       | 17:57010225  | 0.131   | 0.00306 | <1.0E-314 |
| TRIM38       | 6:25953274   | -0.037  | 0.0046  | 1.02E-15  |
| TRIM4        | 7:99500911   | -0.0542 | 0.00378 | 7.17E-46  |
| TRIM41       | 5:180661980  | 0.0417  | 0.00672 | 6.01E-10  |
| TRIM5        | 11:5701001   | 0.0506  | 0.00605 | 8.26E-17  |
| TRIM52       | 5:180703001  | -0.0409 | 0.00532 | 1.85E-14  |
| TRIM58       | 1:248011866  | 0.123   | 0.00901 | 8.22E-42  |
| TRIM68       | 11:4621485   | 0.0857  | 0.0083  | 9.69E-25  |
| TRIM6-TRIM34 | 11:5664684   | -0.0695 | 0.00888 | 6.12E-15  |
| TRIM8        | 10:104421679 | -0.0291 | 0.00435 | 2.31E-11  |
| TRIM9        | 14:51528533  | -0.0662 | 0.00687 | 9.17E-22  |
| TRIOBP       | 22:38122462  | -0.0414 | 0.00313 | 2.34E-39  |
| TRIP11       | 14:92518233  | 0.123   | 0.0204  | 1.55E-09  |
| TRIP12       | 2:230826145  | -0.0513 | 0.00488 | 1.56E-25  |
| TRIT1        | 1:40295408   | -0.0869 | 0.00465 | 1.95E-75  |
| TRMT10A      | 4:100525934  | -0.0556 | 0.0059  | 6.44E-21  |
| TRMT10B      | 9:37756833   | 0.066   | 0.00595 | 2.84E-28  |
| TRMT112      | 11:64078943  | 0.154   | 0.0119  | 8.87E-38  |
| TRMT12       | 8:125461287  | 0.139   | 0.00425 | 3.96E-214 |
| TRMT1L       | 1:185125043  | 0.0418  | 0.00702 | 2.77E-09  |
| TRMT44       | 4:8454639    | -0.0305 | 0.00366 | 1.02E-16  |
| TRMU         | 22:46698662  | -0.0793 | 0.0119  | 3.22E-11  |
| TRNT1        | 3:3185386    | -0.0389 | 0.00356 | 1.95E-27  |
| TROVE2       | 1:193054154  | 0.0956  | 0.00469 | 7.28E-89  |
| TRPC1        | 3:142436807  | 0.07    | 0.00673 | 4.35E-25  |
| TRPC3        | 4:122899165  | -0.0452 | 0.00338 | 3.46E-40  |
| TRPC4AP      | 20:33584289  | -0.02   | 0.00269 | 1.14E-13  |
| TRPC6        | 11:101384612 | -0.078  | 0.00387 | 3.97E-87  |
| TRPM6        | 9:77486124   | 0.128   | 0.00566 | 1.57E-107 |
| TRPM7        | 15:50942452  | -0.0489 | 0.00293 | 4.22E-61  |
| TRPT1        | 11:63990302  | 0.0461  | 0.00646 | 1.08E-12  |
| TRRAP        | 7:98541261   | -0.0374 | 0.00506 | 1.63E-13  |
| TSEN15       | 1:184023529  | 0.0356  | 0.0049  | 4.31E-13  |
| TSEN2        | 3:12525656   | -0.0943 | 0.00644 | 1.21E-47  |
| TSEN34       | 19:54699252  | -0.0597 | 0.00753 | 2.63E-15  |
| TSGA10       | 2:99704273   | 0.24    | 0.00462 | <1.0E-314 |
| TSHR         | 14:81660997  | -0.0195 | 0.00279 | 2.93E-12  |
| TSHZ2        | 20:52130969  | -0.451  | 0.0278  | 1.04E-57  |

|         |              |         |         |           |
|---------|--------------|---------|---------|-----------|
| TSHZ3   | 19:31842495  | -0.0969 | 0.0113  | 1.24E-17  |
| TSPAN14 | 10:82277341  | -0.0331 | 0.00399 | 1.43E-16  |
| TSPAN15 | 10:71215799  | -0.0428 | 0.00409 | 2.36E-25  |
| TSPAN16 | 19:11431901  | 0.353   | 0.0126  | 1.13E-159 |
| TSPAN18 | 11:44835771  | -0.0389 | 0.00591 | 4.93E-11  |
| TSPAN2  | 1:115602498  | 0.142   | 0.0124  | 6.80E-30  |
| TSPAN3  | 15:77369520  | -0.175  | 0.00563 | 9.31E-195 |
| TSPAN33 | 7:128777461  | 0.0614  | 0.00892 | 6.47E-12  |
| TSPO    | 22:43559137  | -0.0656 | 0.00604 | 3.67E-27  |
| TSPYL1  | 6:116597724  | -0.0211 | 0.00273 | 1.21E-14  |
| TSPYL4  | 6:116530856  | 0.0226  | 0.00378 | 2.41E-09  |
| TSPYL5  | 8:98267908   | 0.103   | 0.0137  | 5.46E-14  |
| TSSC1   | 2:3188755    | -0.0458 | 0.00565 | 6.74E-16  |
| TST     | 22:37421469  | -0.054  | 0.00668 | 7.52E-16  |
| TTBK2   | 15:43241798  | 0.0263  | 0.00267 | 1.13E-22  |
| TTC12   | 11:113187949 | -0.139  | 0.00539 | 1.03E-137 |
| TTC13   | 1:231087722  | 0.0315  | 0.00262 | 1.04E-32  |
| TTC14   | 3:180272509  | -0.0417 | 0.00583 | 9.92E-13  |
| TTC17   | 11:43505707  | 0.0381  | 0.0037  | 1.09E-24  |
| TTC18   | 10:75092353  | 0.0428  | 0.00678 | 2.92E-10  |
| TTC19   | 17:15945608  | -0.024  | 0.00325 | 1.62E-13  |
| TTC21B  | 2:166727401  | -0.0689 | 0.00474 | 5.31E-47  |
| TTC23   | 15:99783965  | 0.0413  | 0.00303 | 1.08E-41  |
| TTC25   | 17:40046186  | 0.0717  | 0.00921 | 8.47E-15  |
| TTC26   | 7:138798004  | -0.0668 | 0.00545 | 4.44E-34  |
| TTC27   | 2:32903548   | 0.0548  | 0.0056  | 2.20E-22  |
| TTC3    | 21:38503126  | -0.121  | 0.00447 | 7.36E-152 |
| TTC33   | 5:40698397   | -0.0495 | 0.00591 | 6.41E-17  |
| TTC37   | 5:94841313   | -0.121  | 0.00586 | 1.01E-91  |
| TTC38   | 22:46685017  | -0.057  | 0.00862 | 3.93E-11  |
| TTC39B  | 9:15294667   | 0.218   | 0.00532 | <1.0E-314 |
| TTC39C  | 18:21620065  | -0.0521 | 0.00594 | 2.17E-18  |
| TTC4    | 1:55182300   | -0.11   | 0.00487 | 6.54E-108 |
| TTF2    | 1:117605336  | -0.224  | 0.00781 | 2.41E-168 |
| TTK     | 6:80741418   | -0.0199 | 0.00313 | 2.28E-10  |
| TLL1    | 22:43470175  | -0.04   | 0.00546 | 2.49E-13  |
| TLL11   | 9:124756264  | -0.0148 | 0.00228 | 9.76E-11  |
| TLL12   | 22:43553417  | -0.0177 | 0.00297 | 2.82E-09  |
| TLL2    | 6:167767152  | -0.0325 | 0.00478 | 1.28E-11  |

|         |              |         |         |           |
|---------|--------------|---------|---------|-----------|
| TTLL3   | 3:9871393    | 0.0263  | 0.00305 | 8.80E-18  |
| TTLL4   | 2:219634722  | -0.0654 | 0.00372 | 2.84E-67  |
| TTLL5   | 14:76151532  | 0.0454  | 0.00329 | 1.49E-42  |
| TUBA3FP | 22:21365474  | 0.0454  | 0.00457 | 5.10E-23  |
| TUBB    | 6:30690938   | 0.256   | 0.00948 | 2.73E-150 |
| TUBB2A  | 6:3111956    | 2.13    | 0.0476  | <1.0E-314 |
| TUBB6   | 18:12303726  | -0.133  | 0.00665 | 1.07E-85  |
| TUBD1   | 17:57932216  | 0.0981  | 0.00648 | 8.35E-51  |
| TUBE1   | 6:112414035  | 0.0266  | 0.0043  | 6.85E-10  |
| TUBG2   | 17:40786248  | -0.0432 | 0.00565 | 2.48E-14  |
| TUBGCP3 | 13:113198538 | 0.0657  | 0.00511 | 3.04E-37  |
| TUBGCP4 | 15:43680212  | 0.0741  | 0.00473 | 5.45E-54  |
| TUBGCP5 | 15:22804640  | 0.0358  | 0.00518 | 5.06E-12  |
| TUFM    | 16:28847246  | -0.139  | 0.00458 | 1.08E-185 |
| TUSC3   | 8:15524123   | -0.0759 | 0.00929 | 3.95E-16  |
| TVP23C  | 17:15389632  | -0.0553 | 0.00692 | 1.67E-15  |
| TWF1    | 12:44199961  | -0.0476 | 0.00746 | 2.02E-10  |
| TWISTNB | 7:19747915   | 0.0414  | 0.00539 | 1.88E-14  |
| TWSG1   | 18:9343958   | -0.288  | 0.0254  | 1.90E-29  |
| TXK     | 4:48089461   | 0.0959  | 0.00648 | 1.39E-48  |
| TXNDC12 | 1:52520858   | 0.251   | 0.0255  | 1.18E-22  |
| TXNDC15 | 5:134279940  | -0.167  | 0.00488 | 1.85E-231 |
| TXNL1   | 18:54281790  | 0.0918  | 0.00855 | 1.38E-26  |
| TXNL4A  | 18:77752801  | 0.187   | 0.00619 | 1.33E-185 |
| TXNRD1  | 12:104693089 | 0.0253  | 0.00322 | 4.78E-15  |
| TXNRD2  | 22:19881556  | 0.0222  | 0.00251 | 1.42E-18  |
| TYK2    | 19:10464687  | 0.0226  | 0.00304 | 1.42E-13  |
| TYMP    | 22:50978520  | -0.0568 | 0.00372 | 1.87E-51  |
| TYMS    | 18:672043    | -0.0707 | 0.00589 | 8.36E-33  |
| TYW1    | 7:66633428   | -0.214  | 0.022   | 3.62E-22  |
| TYW3    | 1:75220929   | 0.0589  | 0.00594 | 6.44E-23  |
| U2AF1   | 21:44508390  | 0.1     | 0.00474 | 7.86E-95  |
| U2AF1L4 | 19:36234489  | -0.33   | 0.0085  | 3.54E-290 |
| UACA    | 15:71038162  | -0.0731 | 0.00583 | 1.52E-35  |
| UAP1L1  | 9:139958583  | 0.0825  | 0.00542 | 3.76E-51  |
| UBA6    | 4:68556488   | 0.0445  | 0.00377 | 8.45E-32  |
| UBA7    | 3:49798920   | 0.0802  | 0.00384 | 4.67E-93  |
| UBAC2   | 13:99899478  | 0.0148  | 0.00219 | 1.55E-11  |
| UBALD2  | 17:74261677  | 0.0439  | 0.0042  | 2.98E-25  |

|           |              |         |         |           |
|-----------|--------------|---------|---------|-----------|
| UBASH3A   | 21:43855067  | -0.122  | 0.00413 | 1.10E-176 |
| UBASH3B   | 11:122583862 | -0.0342 | 0.00454 | 5.15E-14  |
| UBE2B     | 5:133672655  | 0.181   | 0.0215  | 4.53E-17  |
| UBE2D1    | 10:60144073  | -0.272  | 0.00578 | <1.0E-314 |
| UBE2D3    | 4:103683546  | -0.0444 | 0.0038  | 3.95E-31  |
| UBE2E2    | 3:23412528   | -0.0473 | 0.00509 | 2.32E-20  |
| UBE2F     | 2:238912478  | -0.132  | 0.00941 | 3.76E-44  |
| UBE2G2    | 21:46219184  | -0.0368 | 0.0047  | 6.37E-15  |
| UBE2I     | 16:1378788   | -0.0579 | 0.00527 | 8.01E-28  |
| UBE2K     | 4:39700173   | 0.0245  | 0.00352 | 3.44E-12  |
| UBE2L3    | 22:21938863  | -0.0422 | 0.00473 | 5.83E-19  |
| UBE2O     | 17:74461577  | -0.0777 | 0.0107  | 3.61E-13  |
| UBE2Z     | 17:47026431  | 0.0811  | 0.00392 | 2.00E-91  |
| UBE3B     | 12:109910798 | -0.104  | 0.00635 | 5.43E-59  |
| UBE3C     | 7:156935591  | 0.0372  | 0.00294 | 2.85E-36  |
| UBE4A     | 11:118230359 | -0.0612 | 0.00518 | 9.31E-32  |
| UBE4B     | 1:10174189   | 0.0577  | 0.00517 | 1.24E-28  |
| UBL3      | 13:30442076  | -0.0318 | 0.00486 | 6.64E-11  |
| UBLCP1    | 5:158726535  | -0.0465 | 0.00556 | 7.58E-17  |
| UBN1      | 16:4911239   | -0.0348 | 0.0033  | 8.44E-26  |
| UBQLN4    | 1:156007177  | 0.351   | 0.012   | 3.22E-175 |
| UBR1      | 15:43220785  | 0.0223  | 0.00292 | 2.50E-14  |
| UBR2      | 6:42537608   | 0.0605  | 0.00733 | 1.80E-16  |
| UBR3      | 2:170872617  | -0.0281 | 0.00332 | 3.15E-17  |
| UBXN2A    | 2:24126904   | -0.101  | 0.00616 | 2.07E-59  |
| UBXN6     | 19:4400925   | 0.1     | 0.0102  | 2.28E-22  |
| UCK1      | 9:134386425  | -0.0253 | 0.00403 | 3.74E-10  |
| UCP2      | 11:73686859  | 0.136   | 0.00484 | 5.93E-162 |
| UEVLD     | 11:18574323  | 0.0631  | 0.00593 | 3.42E-26  |
| UFC1      | 1:161128644  | -0.177  | 0.0275  | 1.49E-10  |
| UFM1      | 13:38926390  | -0.147  | 0.0118  | 2.17E-35  |
| UFSP2     | 4:186350063  | -0.0554 | 0.00508 | 2.26E-27  |
| UGDH      | 4:39518110   | 0.154   | 0.00458 | 4.03E-225 |
| UGGT2     | 13:96681165  | 0.204   | 0.00891 | 7.48E-111 |
| UGP2      | 2:64022346   | 0.0587  | 0.00835 | 2.42E-12  |
| UGT2B28   | 4:70123614   | 0.64    | 0.0366  | 9.87E-67  |
| UGT8      | 4:115519824  | -0.0532 | 0.00575 | 2.90E-20  |
| UHRF1BP1  | 6:34743432   | -0.1    | 0.00284 | 3.78E-244 |
| UHRF1BP1L | 12:100519182 | 0.164   | 0.00837 | 5.49E-83  |

|         |              |         |         |           |
|---------|--------------|---------|---------|-----------|
| UIMC1   | 5:176427377  | 0.0335  | 0.00529 | 2.40E-10  |
| ULK2    | 17:19697976  | 0.0344  | 0.00347 | 6.95E-23  |
| ULK3    | 15:75128501  | -0.0409 | 0.003   | 1.54E-41  |
| ULK4    | 3:41765955   | -0.162  | 0.00402 | <1.0E-314 |
| UMPS    | 3:124445764  | -0.0694 | 0.00438 | 2.69E-55  |
| UNC119B | 12:121149560 | 0.188   | 0.0255  | 1.82E-13  |
| UNG     | 12:109537423 | 0.0577  | 0.00476 | 2.34E-33  |
| UPB1    | 22:24885927  | -0.0492 | 0.00297 | 3.14E-60  |
| UPF2    | 10:12100781  | 0.0394  | 0.00446 | 1.42E-18  |
| UPF3A   | 13:115032817 | -0.0523 | 0.0049  | 2.82E-26  |
| UPK1B   | 3:118946797  | -0.133  | 0.00786 | 4.55E-63  |
| UPK3A   | 22:45679633  | -0.0401 | 0.00365 | 8.94E-28  |
| UPP1    | 7:48134719   | 0.0534  | 0.00354 | 3.12E-50  |
| UQCR10  | 22:30187702  | 0.0345  | 0.00446 | 1.29E-14  |
| UQCR11  | 19:1589064   | -0.0782 | 0.00668 | 3.06E-31  |
| UQCRC1  | 3:48636507   | -0.162  | 0.00855 | 1.48E-77  |
| UROD    | 1:45498181   | 0.0445  | 0.00482 | 3.65E-20  |
| UROS    | 10:127496359 | 0.119   | 0.00453 | 2.07E-143 |
| USB1    | 16:58027898  | -0.113  | 0.00624 | 3.72E-71  |
| USF1    | 1:161019040  | -0.0348 | 0.00335 | 4.82E-25  |
| USF2    | 19:35818609  | -0.0155 | 0.00265 | 5.09E-09  |
| USMG5   | 10:105125451 | -0.0528 | 0.00533 | 6.14E-23  |
| USO1    | 4:76643274   | 0.0548  | 0.00491 | 1.31E-28  |
| USP1    | 1:62891354   | -0.126  | 0.0179  | 2.26E-12  |
| USP10   | 16:84740884  | 0.0561  | 0.00492 | 7.78E-30  |
| USP12   | 13:27678791  | -0.0858 | 0.0105  | 4.81E-16  |
| USP15   | 12:62665787  | -0.0623 | 0.00397 | 3.43E-54  |
| USP16   | 21:30430978  | -0.0417 | 0.00582 | 9.33E-13  |
| USP20   | 9:132636601  | 0.0164  | 0.00213 | 1.83E-14  |
| USP24   | 1:55575670   | -0.0335 | 0.00416 | 1.00E-15  |
| USP3    | 15:63794279  | -0.0537 | 0.00319 | 5.62E-62  |
| USP30   | 12:109490601 | -0.0552 | 0.00506 | 2.07E-27  |
| USP33   | 1:78129593   | 0.0502  | 0.00634 | 3.25E-15  |
| USP34   | 2:61467379   | 0.017   | 0.00287 | 3.78E-09  |
| USP36   | 17:76785240  | -0.0467 | 0.00307 | 3.56E-51  |
| USP37   | 2:219328577  | -0.0252 | 0.0037  | 1.11E-11  |
| USP38   | 4:144163755  | 0.0319  | 0.00287 | 2.18E-28  |
| USP39   | 2:85860448   | 0.0966  | 0.00584 | 6.32E-60  |
| USP4    | 3:49326178   | 0.0431  | 0.00478 | 2.54E-19  |



|          |              |         |         |           |
|----------|--------------|---------|---------|-----------|
| USP44    | 12:95960102  | 0.0825  | 0.00758 | 2.36E-27  |
| USP45    | 6:99966805   | -0.0337 | 0.00469 | 8.08E-13  |
| USP47    | 11:11889754  | -0.0315 | 0.00421 | 8.87E-14  |
| USP48    | 1:22109370   | -0.026  | 0.00312 | 1.06E-16  |
| USP53    | 4:120106348  | -0.525  | 0.0111  | <1.0E-314 |
| USP6     | 17:5083228   | -0.104  | 0.0158  | 4.77E-11  |
| USP6NL   | 10:11697424  | 0.0656  | 0.00948 | 5.12E-12  |
| USP8     | 15:50734694  | 0.0761  | 0.00462 | 1.85E-59  |
| UST      | 6:149166343  | 0.0855  | 0.00839 | 3.71E-24  |
| UTS2     | 1:7911302    | -1.42   | 0.033   | <1.0E-314 |
| UVSSA    | 4:1332142    | -0.269  | 0.0205  | 1.26E-38  |
| UXS1     | 2:106810767  | -0.0422 | 0.007   | 1.70E-09  |
| VAMP1    | 12:6580066   | 0.0539  | 0.00405 | 7.45E-40  |
| VAMP2    | 17:8071352   | -0.089  | 0.00793 | 6.45E-29  |
| VAMP5    | 2:85801137   | 0.117   | 0.00838 | 9.21E-44  |
| VAMP8    | 2:85794297   | 0.147   | 0.00434 | 1.53E-226 |
| VAPA     | 18:9866979   | -0.0526 | 0.00379 | 4.15E-43  |
| VAPB     | 20:56955371  | -0.0471 | 0.00625 | 5.66E-14  |
| VASH1    | 14:77182302  | -0.116  | 0.00277 | <1.0E-314 |
| VASH2    | 1:213213567  | -0.0193 | 0.00256 | 4.78E-14  |
| VAV2     | 9:136651629  | -0.0286 | 0.00331 | 7.87E-18  |
| VAV3     | 1:108297209  | -0.0838 | 0.00613 | 7.36E-42  |
| VCP      | 9:35011279   | -0.041  | 0.00315 | 4.03E-38  |
| VDR      | 12:48347133  | -0.0222 | 0.00361 | 7.55E-10  |
| VEGFA    | 6:43710959   | -0.0644 | 0.00608 | 6.64E-26  |
| VEPH1    | 3:157261335  | -0.0409 | 0.00413 | 6.29E-23  |
| VEZT     | 12:95687486  | -0.154  | 0.00941 | 2.23E-58  |
| VIL1     | 2:219279673  | 0.0276  | 0.00329 | 6.76E-17  |
| VIM      | 10:17254832  | 0.031   | 0.00396 | 5.87E-15  |
| VIPR1    | 3:42531939   | 0.0437  | 0.0034  | 3.31E-37  |
| VKORC1L1 | 7:65337976   | -0.195  | 0.0132  | 7.64E-49  |
| VLDLR    | 9:2622278    | -0.138  | 0.00727 | 2.57E-78  |
| VN1R1    | 19:57961191  | -0.0616 | 0.00558 | 4.35E-28  |
| VNN1     | 6:133015662  | -0.364  | 0.00902 | <1.0E-314 |
| VNN2     | 6:133076489  | 0.175   | 0.00606 | 9.01E-171 |
| VNN3     | 6:133060195  | 0.247   | 0.0078  | 4.23E-201 |
| VOPP1    | 7:55610829   | 0.0436  | 0.00622 | 2.90E-12  |
| VPS11    | 11:118920453 | 0.0484  | 0.00432 | 7.28E-29  |
| VPS13A   | 9:79819030   | 0.0765  | 0.00701 | 1.92E-27  |

|         |              |         |         |           |
|---------|--------------|---------|---------|-----------|
| VPS13C  | 15:62352374  | -0.0618 | 0.00387 | 4.21E-56  |
| VPS26A  | 10:70885320  | 0.105   | 0.00492 | 1.07E-96  |
| VPS28   | 8:145635534  | -0.212  | 0.00972 | 2.72E-101 |
| VPS29   | 12:110939421 | -0.0642 | 0.00424 | 7.25E-51  |
| VPS33A  | 12:122679121 | 0.0295  | 0.00441 | 2.46E-11  |
| VPS33B  | 15:91557186  | 0.0414  | 0.00392 | 7.25E-26  |
| VPS36   | 13:52983981  | 0.0535  | 0.00337 | 1.19E-55  |
| VPS37B  | 12:123361501 | -0.0302 | 0.00481 | 3.72E-10  |
| VPS41   | 7:38758326   | -0.0473 | 0.0039  | 2.35E-33  |
| VPS53   | 17:618701    | 0.121   | 0.00419 | 1.61E-169 |
| VPS54   | 2:64139834   | 0.0369  | 0.00361 | 2.36E-24  |
| VPS8    | 3:184775860  | 0.166   | 0.0101  | 3.71E-59  |
| VRK1    | 14:97269197  | -0.12   | 0.00852 | 6.06E-44  |
| VRK2    | 2:58338086   | -0.057  | 0.00401 | 5.89E-45  |
| VRK3    | 19:50526994  | 0.0273  | 0.00344 | 2.27E-15  |
| VSIG10  | 12:118501598 | 0.0746  | 0.00682 | 1.44E-27  |
| VSTM1   | 19:54544575  | -0.872  | 0.0201  | <1.0E-314 |
| VWA5A   | 11:123943259 | 0.0606  | 0.00467 | 7.05E-38  |
| VWF     | 12:6205767   | -0.165  | 0.0155  | 2.31E-26  |
| WAC     | 10:28869729  | 0.0209  | 0.00321 | 8.80E-11  |
| WAPAL   | 10:88160039  | -0.0585 | 0.00626 | 1.33E-20  |
| WARS    | 14:100840596 | -0.288  | 0.0076  | 1.35E-277 |
| WARS2   | 1:119577837  | -0.0276 | 0.00389 | 1.36E-12  |
| WASF1   | 6:110500355  | 0.0448  | 0.00534 | 5.98E-17  |
| WASF3   | 13:27184184  | -0.0241 | 0.00348 | 4.50E-12  |
| WASL    | 7:123360007  | 0.0336  | 0.0034  | 8.38E-23  |
| WBP11   | 12:14979169  | 0.0466  | 0.0054  | 8.65E-18  |
| WBP2NL  | 22:42416987  | 0.032   | 0.00441 | 4.34E-13  |
| WBP4    | 13:41673457  | -0.0701 | 0.00772 | 1.52E-19  |
| WBSCR22 | 7:73114645   | -0.152  | 0.0106  | 6.33E-46  |
| WBSCR27 | 7:73242908   | -0.0228 | 0.00293 | 7.62E-15  |
| WDFY1   | 2:224787704  | 0.0569  | 0.00407 | 8.57E-44  |
| WDFY4   | 10:49933974  | -0.243  | 0.00753 | 1.61E-208 |
| WDPCP   | 2:63495875   | 0.0306  | 0.00346 | 1.14E-18  |
| WDR1    | 4:10100801   | -0.0947 | 0.00309 | 1.41E-190 |
| WDR11   | 10:122601203 | -0.14   | 0.00656 | 1.71E-96  |
| WDR17   | 4:177020806  | -0.151  | 0.0163  | 2.80E-20  |
| WDR19   | 4:39140277   | -0.0562 | 0.00371 | 9.41E-51  |
| WDR25   | 14:100825670 | -0.0315 | 0.00239 | 4.83E-39  |

|         |              |         |         |           |
|---------|--------------|---------|---------|-----------|
| WDR27   | 6:170063010  | -0.0534 | 0.00499 | 2.02E-26  |
| WDR3    | 1:118515496  | -0.0692 | 0.00954 | 4.45E-13  |
| WDR33   | 2:128414113  | 0.0341  | 0.00431 | 2.89E-15  |
| WDR35   | 2:20134248   | -0.0425 | 0.00688 | 7.40E-10  |
| WDR36   | 5:110467753  | -0.0256 | 0.00309 | 1.77E-16  |
| WDR37   | 10:1102796   | 0.0213  | 0.00264 | 8.62E-16  |
| WDR41   | 5:76780524   | 0.0911  | 0.00364 | 4.62E-131 |
| WDR52   | 3:113196702  | -0.0551 | 0.00409 | 8.58E-41  |
| WDR55   | 5:140079408  | 0.0238  | 0.00325 | 2.85E-13  |
| WDR5B   | 3:122163022  | -0.0793 | 0.00456 | 5.66E-66  |
| WDR6    | 3:49035885   | -0.0579 | 0.00338 | 5.49E-64  |
| WDR60   | 7:158676826  | 0.107   | 0.00766 | 7.85E-44  |
| WDR61   | 15:78606170  | -0.0549 | 0.00589 | 1.49E-20  |
| WDR63   | 1:85514841   | 0.0332  | 0.00268 | 5.77E-35  |
| WDR66   | 12:122400813 | -0.0286 | 0.00241 | 3.39E-32  |
| WDR67   | 8:124154275  | 0.0585  | 0.00564 | 6.37E-25  |
| WDR7    | 18:54319099  | 0.0412  | 0.00392 | 1.40E-25  |
| WDR73   | 15:85180319  | 0.0579  | 0.00443 | 2.31E-38  |
| WDR75   | 2:190319341  | 0.111   | 0.00961 | 1.15E-30  |
| WDR81   | 17:1690303   | 0.0147  | 0.00246 | 2.40E-09  |
| WDR83OS | 19:12780204  | 0.521   | 0.0558  | 1.29E-20  |
| WDR85   | 9:140453479  | 0.0249  | 0.0042  | 3.32E-09  |
| WDR91   | 7:134880884  | 0.0345  | 0.00286 | 4.86E-33  |
| WDR92   | 2:68426624   | 0.0511  | 0.00348 | 9.56E-48  |
| WDSUB1  | 2:160087815  | -0.087  | 0.00572 | 3.60E-51  |
| WDYHV1  | 8:124455097  | 0.052   | 0.00457 | 1.18E-29  |
| WEE1    | 11:9592477   | -0.0344 | 0.00509 | 1.63E-11  |
| WFDC3   | 20:44402869  | 0.0943  | 0.00466 | 8.24E-88  |
| WHSC1L1 | 8:38164650   | 0.0348  | 0.00429 | 6.29E-16  |
| WIPI1   | 17:66449844  | 0.15    | 0.00649 | 5.37E-112 |
| WIPI2   | 7:5253775    | 0.161   | 0.0124  | 5.43E-38  |
| WLS     | 1:68737383   | -0.493  | 0.0137  | 6.23E-254 |
| WNT4    | 1:22446108   | 0.0228  | 0.00308 | 1.44E-13  |
| WRB     | 21:40741846  | -0.28   | 0.00667 | <1.0E-314 |
| WRN     | 8:30957765   | 0.0362  | 0.00561 | 1.18E-10  |
| WRNIP1  | 6:2765697    | 0.0511  | 0.00274 | 3.85E-75  |
| WSB1    | 17:25647880  | 0.0753  | 0.00411 | 1.00E-72  |
| WSB2    | 12:118501598 | 0.0688  | 0.00734 | 9.69E-21  |
| WTAP    | 6:160182796  | -0.169  | 0.0107  | 1.69E-54  |

|          |              |         |         |           |
|----------|--------------|---------|---------|-----------|
| WWC2     | 4:184019859  | -0.106  | 0.0101  | 1.41E-25  |
| WVOX     | 16:78282458  | 0.0226  | 0.00297 | 2.60E-14  |
| WWP1     | 8:87446737   | 0.217   | 0.0198  | 1.74E-27  |
| WWP2     | 16:69978687  | -0.0766 | 0.00401 | 1.68E-78  |
| XBP1     | 22:29234593  | -0.0512 | 0.00384 | 6.82E-40  |
| XIRP2    | 2:167962531  | -0.0259 | 0.00413 | 3.77E-10  |
| XKR3     | 22:17233296  | -1.21   | 0.0267  | <1.0E-314 |
| XKR6     | 8:10964373   | 0.0885  | 0.00946 | 1.26E-20  |
| XKR8     | 1:28278138   | 0.0253  | 0.00347 | 3.36E-13  |
| XPNPEP1  | 10:111669132 | 0.0588  | 0.00616 | 1.98E-21  |
| XPO1     | 2:61763207   | 0.0262  | 0.00425 | 7.41E-10  |
| XPO4     | 13:21442321  | -0.0209 | 0.00339 | 8.02E-10  |
| XPO6     | 16:28241942  | -0.0487 | 0.00379 | 3.12E-37  |
| XPO7     | 8:21739832   | 0.067   | 0.0113  | 2.88E-09  |
| XRCC1    | 19:44011568  | 0.0442  | 0.00541 | 3.98E-16  |
| XRCC2    | 7:152337646  | -0.0762 | 0.00472 | 3.03E-57  |
| XRCC3    | 14:104131033 | 0.0309  | 0.00294 | 1.71E-25  |
| XRCC4    | 5:82637324   | 0.0553  | 0.00858 | 1.25E-10  |
| XRCC5    | 2:216980258  | 0.0257  | 0.00289 | 8.07E-19  |
| XRCC6BP1 | 12:58342196  | 0.0706  | 0.00403 | 7.66E-67  |
| XRN2     | 20:21258707  | 0.0261  | 0.00415 | 3.71E-10  |
| XRR1     | 11:74513449  | -0.227  | 0.00299 | <1.0E-314 |
| XYLB     | 3:38487802   | -0.0851 | 0.00304 | 5.71E-161 |
| XYLT1    | 16:17542995  | 0.0411  | 0.00365 | 5.16E-29  |
| YAF2     | 12:42637999  | 0.0313  | 0.00409 | 2.21E-14  |
| YEATS4   | 12:69732105  | 0.21    | 0.00487 | <1.0E-314 |
| YIF1B    | 19:38796578  | -0.0523 | 0.00398 | 8.19E-39  |
| YIPF1    | 1:54337886   | -0.0262 | 0.00414 | 2.46E-10  |
| YIPF3    | 6:43534399   | -0.0628 | 0.00891 | 1.95E-12  |
| YIPF5    | 5:143550217  | 0.124   | 0.00449 | 1.35E-156 |
| YME1L1   | 10:27392343  | 0.0316  | 0.00416 | 3.99E-14  |
| YPEL1    | 22:22055280  | -0.0842 | 0.00481 | 8.11E-67  |
| YPEL3    | 16:30118345  | -0.0944 | 0.00799 | 9.02E-32  |
| YTHDC2   | 5:112937962  | -0.0664 | 0.00316 | 4.69E-94  |
| YTHDF3   | 8:64084388   | 0.0754  | 0.00472 | 3.35E-56  |
| YWHAB    | 20:43520287  | 0.081   | 0.00408 | 1.38E-84  |
| YWHAH    | 22:32355011  | -0.0694 | 0.00603 | 2.52E-30  |
| ZACN     | 17:74077797  | 0.0293  | 0.00317 | 3.58E-20  |
| ZADH2    | 18:72910687  | 0.125   | 0.00381 | 7.57E-216 |

|          |              |         |         |           |
|----------|--------------|---------|---------|-----------|
| ZAK      | 2:174030566  | 0.0813  | 0.00573 | 6.84E-45  |
| ZBED4    | 22:50249677  | -0.0307 | 0.00424 | 5.33E-13  |
| ZBED5    | 11:10874594  | 0.148   | 0.00847 | 7.30E-67  |
| ZBTB20   | 3:114792654  | 0.146   | 0.00671 | 3.25E-100 |
| ZBTB25   | 14:64960631  | 0.046   | 0.00596 | 1.38E-14  |
| ZBTB39   | 12:57403340  | 0.101   | 0.0123  | 4.11E-16  |
| ZBTB40   | 1:22809338   | -0.0335 | 0.00313 | 2.36E-26  |
| ZBTB43   | 9:129575594  | 0.0359  | 0.00547 | 5.63E-11  |
| ZBTB49   | 4:4306263    | -0.0386 | 0.00351 | 7.33E-28  |
| ZBTB7B   | 1:154989595  | -0.0313 | 0.0043  | 3.69E-13  |
| ZC2HC1A  | 8:79555186   | 0.301   | 0.00692 | <1.0E-314 |
| ZC3H13   | 13:46641466  | -0.0358 | 0.00528 | 1.34E-11  |
| ZC3H15   | 2:187346255  | -0.029  | 0.00394 | 1.90E-13  |
| ZC3H18   | 16:88680855  | 0.0183  | 0.00298 | 8.13E-10  |
| ZC3H6    | 2:113007757  | 0.0646  | 0.00618 | 2.60E-25  |
| ZC3H7A   | 16:11878033  | -0.0313 | 0.00374 | 8.10E-17  |
| ZC3HAV1  | 7:138815913  | -0.0721 | 0.00818 | 1.54E-18  |
| ZC3HAV1L | 7:138724105  | -0.0446 | 0.00474 | 6.80E-21  |
| ZCCHC11  | 1:52964160   | -0.119  | 0.0136  | 2.67E-18  |
| ZCCHC14  | 16:87426667  | -0.033  | 0.00307 | 1.02E-26  |
| ZCCHC17  | 1:31755501   | 0.0543  | 0.00508 | 2.32E-26  |
| ZCCHC7   | 9:37362160   | 0.0429  | 0.00355 | 3.50E-33  |
| ZCCHC9   | 5:80575775   | -0.0253 | 0.00348 | 4.25E-13  |
| ZCRB1    | 12:42767121  | -0.0309 | 0.00475 | 8.00E-11  |
| ZDHHC13  | 11:19140053  | -0.0944 | 0.00536 | 1.62E-67  |
| ZDHHC14  | 6:157975829  | 0.0257  | 0.00416 | 6.54E-10  |
| ZDHHC17  | 12:77153644  | 0.133   | 0.0151  | 1.55E-18  |
| ZDHHC18  | 1:27104612   | -0.072  | 0.00744 | 5.54E-22  |
| ZDHHC2   | 8:17013199   | -0.209  | 0.00927 | 6.70E-108 |
| ZDHHC20  | 13:22009299  | 0.0752  | 0.00449 | 2.02E-61  |
| ZDHHC21  | 9:14694059   | -0.1    | 0.00564 | 8.77E-69  |
| ZDHHC4   | 7:6591041    | -0.0679 | 0.00391 | 9.61E-66  |
| ZDHHC6   | 10:114186157 | 0.0599  | 0.00514 | 5.48E-31  |
| ZDHHC7   | 16:85039732  | -0.0492 | 0.00444 | 3.16E-28  |
| ZFAND1   | 8:82613459   | 0.0521  | 0.00643 | 7.11E-16  |
| ZFAND2A  | 7:1199117    | 0.115   | 0.00427 | 1.10E-150 |
| ZFAND3   | 6:38136736   | -0.0514 | 0.00504 | 3.45E-24  |
| ZFAND4   | 10:46172739  | -0.12   | 0.00818 | 1.21E-47  |
| ZFAND5   | 9:75021526   | -0.0434 | 0.00477 | 1.22E-19  |

|          |              |         |         |           |
|----------|--------------|---------|---------|-----------|
| ZFAT     | 8:135613194  | 0.0309  | 0.00305 | 5.28E-24  |
| ZFP1     | 16:75187465  | 0.0547  | 0.00422 | 7.76E-38  |
| ZFP161   | 18:5278970   | 0.0459  | 0.00417 | 6.26E-28  |
| ZFP28    | 19:57092369  | 0.0833  | 0.00358 | 3.61E-114 |
| ZFP30    | 19:38132334  | -0.054  | 0.00376 | 7.12E-46  |
| ZFP36L1  | 14:69206887  | 0.0607  | 0.0082  | 1.49E-13  |
| ZFP36L2  | 2:43452793   | -0.0405 | 0.00598 | 1.43E-11  |
| ZFP82    | 19:36833798  | -0.0405 | 0.0055  | 2.14E-13  |
| ZFP90    | 16:68577567  | 0.178   | 0.00602 | 2.05E-177 |
| ZFP91    | 11:58346153  | -0.0281 | 0.00362 | 9.71E-15  |
| ZFYVE1   | 14:73455189  | 0.0252  | 0.00325 | 1.22E-14  |
| ZFYVE19  | 15:41112360  | 0.022   | 0.00258 | 2.33E-17  |
| ZFYVE27  | 10:99492671  | 0.0227  | 0.0035  | 9.46E-11  |
| ZG16B    | 16:2880614   | 0.0715  | 0.00423 | 1.80E-62  |
| ZKSCAN1  | 7:99608029   | -0.0288 | 0.00367 | 5.58E-15  |
| ZKSCAN3  | 6:28386739   | 0.0465  | 0.00496 | 9.79E-21  |
| ZKSCAN5  | 7:99102911   | 0.0683  | 0.00431 | 3.99E-55  |
| ZMAT2    | 5:140032947  | -0.0667 | 0.00743 | 3.54E-19  |
| ZMAT3    | 3:178777166  | 0.0268  | 0.00345 | 9.24E-15  |
| ZMAT4    | 8:40618018   | -0.131  | 0.00875 | 1.20E-49  |
| ZMPSTE24 | 1:40676406   | 0.0532  | 0.00819 | 8.98E-11  |
| ZMYM5    | 13:20376135  | 0.0824  | 0.00502 | 3.64E-59  |
| ZMYND12  | 1:42912305   | 0.0317  | 0.00373 | 2.54E-17  |
| ZNF10    | 12:133761543 | 0.043   | 0.00554 | 1.07E-14  |
| ZNF100   | 19:21873996  | -0.343  | 0.00738 | <1.0E-314 |
| ZNF107   | 7:64208563   | -0.136  | 0.0102  | 3.27E-40  |
| ZNF121   | 19:9688068   | 0.124   | 0.0136  | 7.00E-20  |
| ZNF124   | 1:247289279  | 0.0875  | 0.00484 | 5.20E-71  |
| ZNF131   | 5:43147919   | 0.0622  | 0.00796 | 6.71E-15  |
| ZNF132   | 19:58939389  | -0.0763 | 0.00442 | 3.98E-65  |
| ZNF134   | 19:58134272  | 0.0714  | 0.00901 | 2.86E-15  |
| ZNF137P  | 19:53092008  | 0.159   | 0.00943 | 3.49E-62  |
| ZNF138   | 7:64274517   | 0.238   | 0.00588 | <1.0E-314 |
| ZNF141   | 4:388013     | 0.061   | 0.00993 | 8.51E-10  |
| ZNF143   | 11:9497952   | -0.171  | 0.00708 | 2.84E-122 |
| ZNF146   | 19:36724666  | -0.048  | 0.0069  | 4.02E-12  |
| ZNF154   | 19:58230279  | -0.292  | 0.0277  | 1.12E-25  |
| ZNF155   | 19:44488352  | 0.337   | 0.00899 | 2.06E-272 |
| ZNF160   | 19:53589049  | 0.104   | 0.00563 | 6.13E-74  |

|         |             |         |         |           |
|---------|-------------|---------|---------|-----------|
| ZNF167  | 3:44592979  | -0.0563 | 0.00488 | 2.13E-30  |
| ZNF169  | 9:97033949  | -0.0384 | 0.0035  | 1.26E-27  |
| ZNF175  | 19:52056246 | 0.0706  | 0.00549 | 2.50E-37  |
| ZNF177  | 19:9434872  | 0.332   | 0.016   | 5.89E-92  |
| ZNF180  | 19:45004693 | 0.0446  | 0.0054  | 1.67E-16  |
| ZNF189  | 9:104161942 | -0.0489 | 0.00697 | 2.46E-12  |
| ZNF19   | 16:71558970 | -0.0388 | 0.00627 | 6.61E-10  |
| ZNF192  | 6:28084733  | -0.059  | 0.00685 | 8.94E-18  |
| ZNF193  | 6:28197493  | -0.165  | 0.0139  | 3.12E-32  |
| ZNF195  | 11:3378063  | 0.0709  | 0.00733 | 5.41E-22  |
| ZNF197  | 3:44737806  | -0.0663 | 0.00455 | 3.84E-47  |
| ZNF200  | 16:3310883  | 0.0475  | 0.0043  | 4.03E-28  |
| ZNF204P | 6:27377843  | -0.0362 | 0.00424 | 1.60E-17  |
| ZNF205  | 16:3168836  | -0.0162 | 0.00217 | 9.19E-14  |
| ZNF207  | 17:30692396 | 0.0415  | 0.00547 | 3.85E-14  |
| ZNF208  | 19:22161490 | -0.431  | 0.0176  | 3.32E-125 |
| ZNF211  | 19:58154473 | 0.0697  | 0.00649 | 1.30E-26  |
| ZNF213  | 16:3148130  | 0.0196  | 0.00215 | 1.22E-19  |
| ZNF215  | 11:6948139  | -0.107  | 0.00323 | 4.53E-218 |
| ZNF217  | 20:52186784 | -0.0402 | 0.00435 | 4.02E-20  |
| ZNF223  | 19:44567510 | -0.228  | 0.00816 | 6.31E-160 |
| ZNF226  | 19:44719996 | -0.0328 | 0.00444 | 1.74E-13  |
| ZNF227  | 19:44732658 | 0.123   | 0.0159  | 8.91E-15  |
| ZNF23   | 16:71436836 | -0.0352 | 0.00476 | 1.68E-13  |
| ZNF230  | 19:44510933 | 0.0851  | 0.00548 | 3.27E-53  |
| ZNF234  | 19:44645652 | 0.0477  | 0.00487 | 1.90E-22  |
| ZNF236  | 18:74568937 | 0.0199  | 0.00208 | 1.52E-21  |
| ZNF239  | 10:44038969 | 0.039   | 0.0051  | 2.21E-14  |
| ZNF24   | 18:32957283 | 0.0603  | 0.00338 | 2.70E-69  |
| ZNF248  | 10:38066592 | -0.0671 | 0.00837 | 1.24E-15  |
| ZNF253  | 19:19954714 | -0.0398 | 0.00659 | 1.61E-09  |
| ZNF260  | 19:36986063 | -0.0735 | 0.00573 | 4.42E-37  |
| ZNF266  | 19:9473201  | 0.265   | 0.00433 | <1.0E-314 |
| ZNF271  | 18:32905710 | -0.079  | 0.0054  | 1.74E-47  |
| ZNF273  | 7:64415252  | -0.0509 | 0.00761 | 2.51E-11  |
| ZNF280D | 15:57014578 | -0.0226 | 0.00317 | 1.14E-12  |
| ZNF281  | 1:200326810 | -0.0482 | 0.00393 | 4.50E-34  |
| ZNF286A | 17:15592879 | -0.843  | 0.0178  | <1.0E-314 |
| ZNF30   | 19:35455130 | 0.0568  | 0.00882 | 1.31E-10  |

|          |             |         |         |           |
|----------|-------------|---------|---------|-----------|
| ZNF300P1 | 5:150280562 | -0.0356 | 0.0052  | 8.42E-12  |
| ZNF302   | 19:35153457 | 0.166   | 0.00689 | 1.54E-121 |
| ZNF304   | 19:57909297 | 0.0483  | 0.00686 | 2.22E-12  |
| ZNF317   | 19:9259777  | -0.0383 | 0.0046  | 1.15E-16  |
| ZNF318   | 6:43385975  | -0.0783 | 0.00683 | 4.90E-30  |
| ZNF321P  | 19:53448098 | -0.064  | 0.00701 | 9.39E-20  |
| ZNF323   | 6:28325308  | -0.0215 | 0.00308 | 3.02E-12  |
| ZNF329   | 19:58605735 | -0.052  | 0.00704 | 1.77E-13  |
| ZNF331   | 19:54017032 | 0.0396  | 0.0066  | 2.10E-09  |
| ZNF333   | 19:14803329 | -0.0632 | 0.00262 | 2.25E-122 |
| ZNF337   | 20:25661716 | 0.0999  | 0.0101  | 4.98E-23  |
| ZNF33A   | 10:38336324 | -0.0665 | 0.00818 | 5.58E-16  |
| ZNF34    | 8:146017782 | -0.0225 | 0.00341 | 4.33E-11  |
| ZNF343   | 20:2488941  | 0.0333  | 0.00464 | 8.90E-13  |
| ZNF347   | 19:53667147 | 0.0418  | 0.00632 | 4.26E-11  |
| ZNF354A  | 5:178094484 | 0.279   | 0.00686 | <1.0E-314 |
| ZNF354B  | 5:178295339 | -0.0491 | 0.00795 | 6.96E-10  |
| ZNF354C  | 5:178447321 | -0.0346 | 0.00454 | 3.28E-14  |
| ZNF362   | 1:33723211  | 0.028   | 0.00331 | 3.91E-17  |
| ZNF37A   | 10:38461675 | -0.0651 | 0.00487 | 4.29E-40  |
| ZNF37BP  | 10:43095722 | -0.131  | 0.00855 | 3.63E-52  |
| ZNF395   | 8:28259089  | -0.0231 | 0.00381 | 1.57E-09  |
| ZNF415   | 19:53651845 | -0.183  | 0.0097  | 3.30E-77  |
| ZNF417   | 19:58447904 | -0.0594 | 0.00835 | 1.34E-12  |
| ZNF418   | 19:58464224 | -0.136  | 0.0105  | 8.89E-38  |
| ZNF425   | 7:148823366 | 0.059   | 0.00518 | 1.19E-29  |
| ZNF429   | 19:21664201 | 0.723   | 0.0178  | <1.0E-314 |
| ZNF438   | 10:31366929 | 0.048   | 0.00655 | 2.65E-13  |
| ZNF443   | 19:12534589 | 0.0674  | 0.00696 | 5.47E-22  |
| ZNF45    | 19:44380536 | -0.0377 | 0.00524 | 7.38E-13  |
| ZNF460   | 19:57798198 | -0.111  | 0.00499 | 1.68E-105 |
| ZNF467   | 7:149476324 | 0.0385  | 0.00587 | 5.81E-11  |
| ZNF468   | 19:53367338 | -0.147  | 0.0135  | 1.91E-27  |
| ZNF470   | 19:57092369 | 0.0641  | 0.00445 | 3.34E-46  |
| ZNF471   | 19:57060087 | -0.0478 | 0.00423 | 2.26E-29  |
| ZNF473   | 19:50529054 | -0.0258 | 0.00429 | 1.87E-09  |
| ZNF480   | 19:52826693 | 0.182   | 0.0273  | 3.32E-11  |
| ZNF483   | 9:114297244 | -0.0837 | 0.0114  | 2.33E-13  |
| ZNF487P  | 10:44024549 | 0.0399  | 0.00545 | 2.70E-13  |



|        |              |         |         |           |
|--------|--------------|---------|---------|-----------|
| ZNF493 | 19:21646167  | -0.0969 | 0.00411 | 6.80E-117 |
| ZNF501 | 3:44762830   | -0.0511 | 0.00674 | 3.83E-14  |
| ZNF502 | 3:44762830   | -0.153  | 0.00763 | 2.01E-86  |
| ZNF506 | 19:19887108  | 0.0639  | 0.0107  | 2.59E-09  |
| ZNF507 | 19:32829306  | -0.0582 | 0.00612 | 2.69E-21  |
| ZNF512 | 2:27848586   | -0.0283 | 0.00365 | 1.01E-14  |
| ZNF514 | 2:95822447   | 0.0919  | 0.0042  | 1.23E-101 |
| ZNF516 | 18:74253644  | 0.0457  | 0.00386 | 6.56E-32  |
| ZNF519 | 18:14133319  | -0.0649 | 0.00737 | 1.71E-18  |
| ZNF528 | 19:52923595  | 0.0817  | 0.00794 | 1.39E-24  |
| ZNF529 | 19:37115575  | -0.0563 | 0.00452 | 4.35E-35  |
| ZNF532 | 18:56656824  | -0.0449 | 0.00621 | 5.76E-13  |
| ZNF544 | 19:58791213  | -0.0468 | 0.0039  | 8.57E-33  |
| ZNF547 | 19:57871141  | -0.0374 | 0.00508 | 2.20E-13  |
| ZNF548 | 19:57924420  | -0.0683 | 0.00555 | 2.24E-34  |
| ZNF550 | 19:58113074  | -0.0506 | 0.00533 | 3.09E-21  |
| ZNF552 | 19:58291847  | -0.0794 | 0.00607 | 1.55E-38  |
| ZNF555 | 19:2863551   | -0.0567 | 0.00646 | 2.38E-18  |
| ZNF558 | 19:8910658   | 0.0395  | 0.00608 | 8.99E-11  |
| ZNF561 | 19:9757469   | 0.107   | 0.00855 | 4.16E-35  |
| ZNF566 | 19:36999787  | 0.0537  | 0.00636 | 3.81E-17  |
| ZNF577 | 19:52399559  | 0.0652  | 0.00705 | 3.08E-20  |
| ZNF584 | 19:58934457  | 0.23    | 0.036   | 1.88E-10  |
| ZNF586 | 19:58291847  | -0.0667 | 0.00379 | 1.90E-67  |
| ZNF587 | 19:58389384  | 0.149   | 0.00839 | 8.13E-69  |
| ZNF589 | 3:48276077   | -0.109  | 0.00402 | 5.11E-153 |
| ZNF592 | 15:85357727  | -0.0424 | 0.0035  | 3.39E-33  |
| ZNF593 | 1:26496370   | -0.0483 | 0.00418 | 1.80E-30  |
| ZNF595 | 4:72048      | -0.11   | 0.00705 | 7.91E-54  |
| ZNF596 | 8:197042     | 0.0467  | 0.00641 | 3.92E-13  |
| ZNF597 | 16:3488773   | -0.0522 | 0.00412 | 2.64E-36  |
| ZNF600 | 19:53280650  | -0.143  | 0.0106  | 1.17E-40  |
| ZNF605 | 12:133498857 | -0.188  | 0.0142  | 3.51E-39  |
| ZNF606 | 19:58484344  | -0.0343 | 0.00482 | 1.34E-12  |
| ZNF607 | 19:38150755  | 0.0318  | 0.00343 | 2.76E-20  |
| ZNF613 | 19:52430739  | 0.049   | 0.00595 | 2.04E-16  |
| ZNF614 | 19:52517520  | 0.0941  | 0.00533 | 9.07E-68  |
| ZNF615 | 19:52500769  | -0.0494 | 0.00569 | 4.72E-18  |
| ZNF622 | 5:16512469   | 0.0252  | 0.00385 | 6.09E-11  |

|         |              |         |         |           |
|---------|--------------|---------|---------|-----------|
| ZNF623  | 8:144725063  | 0.0418  | 0.00378 | 3.83E-28  |
| ZNF624  | 17:16587287  | 0.171   | 0.0126  | 3.19E-41  |
| ZNF625  | 19:12274521  | 0.0304  | 0.00462 | 5.31E-11  |
| ZNF638  | 2:71651939   | 0.0578  | 0.00294 | 5.78E-83  |
| ZNF639  | 3:179048224  | 0.0595  | 0.006   | 5.60E-23  |
| ZNF641  | 12:48757856  | -0.227  | 0.00599 | 6.85E-278 |
| ZNF646  | 16:31082025  | 0.0336  | 0.00258 | 3.34E-38  |
| ZNF649  | 19:52402357  | -0.048  | 0.00665 | 6.41E-13  |
| ZNF664  | 12:124430812 | 0.0226  | 0.00249 | 1.64E-19  |
| ZNF665  | 19:53682988  | 0.103   | 0.00715 | 5.40E-46  |
| ZNF669  | 1:247267668  | -0.0348 | 0.0041  | 3.00E-17  |
| ZNF670  | 1:247227819  | -0.0978 | 0.0101  | 8.64E-22  |
| ZNF671  | 19:58286522  | -0.0538 | 0.0063  | 1.72E-17  |
| ZNF675  | 19:23870110  | -0.168  | 0.0278  | 1.52E-09  |
| ZNF677  | 19:53770764  | 0.0729  | 0.00867 | 5.48E-17  |
| ZNF682  | 19:20101950  | -0.136  | 0.0203  | 2.40E-11  |
| ZNF683  | 1:26696636   | 0.0303  | 0.00497 | 1.11E-09  |
| ZNF695  | 1:247134691  | -0.0207 | 0.0032  | 1.18E-10  |
| ZNF7    | 8:146045454  | 0.0208  | 0.00309 | 2.02E-11  |
| ZNF700  | 19:12069427  | 0.1     | 0.0138  | 5.37E-13  |
| ZNF701  | 19:53083020  | 0.19    | 0.0171  | 1.83E-28  |
| ZNF702P | 19:53497662  | -0.0852 | 0.00865 | 1.08E-22  |
| ZNF713  | 7:55964292   | -0.233  | 0.0113  | 2.89E-90  |
| ZNF718  | 4:146963     | 0.216   | 0.00601 | 7.47E-254 |
| ZNF720  | 16:31711742  | -0.079  | 0.00592 | 4.59E-40  |
| ZNF721  | 4:438538     | 0.301   | 0.015   | 3.16E-86  |
| ZNF737  | 19:20774421  | 0.278   | 0.045   | 6.57E-10  |
| ZNF738  | 19:21518961  | 0.0811  | 0.00681 | 2.84E-32  |
| ZNF740  | 12:53554283  | -0.0622 | 0.00501 | 7.05E-35  |
| ZNF75A  | 16:3364867   | 0.0718  | 0.0054  | 1.03E-39  |
| ZNF76   | 6:35202883   | 0.0197  | 0.00287 | 6.81E-12  |
| ZNF761  | 19:53944732  | -0.0965 | 0.0108  | 5.88E-19  |
| ZNF765  | 19:53916008  | -0.0384 | 0.00651 | 3.81E-09  |
| ZNF767  | 7:149311533  | 0.107   | 0.00406 | 7.91E-144 |
| ZNF768  | 16:30548565  | 0.038   | 0.00435 | 3.35E-18  |
| ZNF77   | 19:2933030   | -0.0832 | 0.0134  | 5.23E-10  |
| ZNF770  | 15:35272173  | 0.124   | 0.0165  | 6.40E-14  |
| ZNF781  | 19:38141758  | -0.04   | 0.00374 | 1.86E-26  |
| ZNF792  | 19:35451330  | -0.0337 | 0.00436 | 1.22E-14  |

|         |              |         |         |           |
|---------|--------------|---------|---------|-----------|
| ZNF793  | 19:38017173  | -0.0449 | 0.00462 | 3.81E-22  |
| ZNF80   | 3:113970906  | -0.0783 | 0.00727 | 8.28E-27  |
| ZNF800  | 7:126962488  | 0.027   | 0.00346 | 6.70E-15  |
| ZNF808  | 19:53067279  | 0.261   | 0.0147  | 1.10E-68  |
| ZNF818P | 19:53713328  | 0.287   | 0.0141  | 7.80E-89  |
| ZNF83   | 19:53134276  | 0.261   | 0.00742 | 2.12E-243 |
| ZNF830  | 17:33260938  | -0.0399 | 0.00425 | 9.56E-21  |
| ZNF839  | 14:102831817 | 0.0285  | 0.00424 | 2.03E-11  |
| ZNF84   | 12:133688942 | -0.0463 | 0.00559 | 1.53E-16  |
| ZNF85   | 19:21145434  | 0.0467  | 0.00586 | 1.83E-15  |
| ZNF91   | 19:23572701  | -0.167  | 0.0125  | 5.66E-40  |
| ZNF92   | 7:64895194   | 0.119   | 0.00806 | 1.43E-48  |
| ZNFX1   | 20:47849216  | 0.0615  | 0.00557 | 5.39E-28  |
| ZNHIT1  | 7:100860636  | -0.0395 | 0.00453 | 3.60E-18  |
| ZNHIT3  | 17:34866915  | 0.0626  | 0.00408 | 4.11E-52  |
| ZNHIT6  | 1:86074379   | -0.0724 | 0.00885 | 3.48E-16  |
| ZNRD1   | 6:29998062   | -0.113  | 0.0103  | 5.85E-28  |
| ZNRF1   | 16:75031931  | -0.0238 | 0.00271 | 2.32E-18  |
| ZP3     | 7:76036380   | -0.0337 | 0.00401 | 5.96E-17  |
| ZRANB1  | 10:126680467 | 0.102   | 0.00948 | 1.22E-26  |
| ZRANB2  | 1:71596192   | -0.0259 | 0.00373 | 4.44E-12  |
| ZRANB3  | 2:135943900  | 0.037   | 0.00475 | 8.34E-15  |
| ZSCAN18 | 19:58598784  | 0.0193  | 0.00318 | 1.41E-09  |
| ZSCAN2  | 15:85170583  | -0.0212 | 0.00316 | 2.13E-11  |
| ZSCAN29 | 15:43617264  | 0.0887  | 0.00462 | 1.65E-79  |
| ZUFSP   | 6:117011380  | 0.0388  | 0.00498 | 7.81E-15  |
| ZXDC    | 3:126170695  | 0.0268  | 0.00277 | 5.47E-22  |
| ZYG11B  | 1:53180716   | 0.0674  | 0.00481 | 7.90E-44  |
| ZYX     | 7:143081942  | 0.0976  | 0.00586 | 8.82E-61  |
| ZZEF1   | 17:3922255   | 0.0256  | 0.00304 | 4.28E-17  |
| ZZZ3    | 1:78070458   | 0.0261  | 0.00423 | 7.33E-10  |

| ROSMAP (brain) eQTLs |           |          |             |                   |          |           |           |             | ROSM.             |
|----------------------|-----------|----------|-------------|-------------------|----------|-----------|-----------|-------------|-------------------|
| Beta                 | Std Error | P-value  | Gene        | Top eSNP Position | Beta     | Std Error | P-value   | Gene        | Top eSNP Position |
| 2.73                 | 0.416     | 5.29E-11 | AADAACL4    | 1:121141967       | -0.0391  | 0.00578   | 1.34E-11  | AADAACL4    | 1:121365903       |
| -3.29                | 0.439     | 6.67E-14 | AADAT       | 4:171060635       | -0.124   | 0.0159    | 6.25E-15  | ABCA6       | 17:67067705       |
| -9.31                | 0.903     | 6.35E-25 | AARD        | 8:117952068       | 0.106    | 0.0118    | 2.63E-19  | ABHD10      | 3:111274523       |
| 8.62                 | 0.833     | 4.27E-25 | ABCA4       | 1:94525623        | -0.124   | 0.0149    | 8.64E-17  | ABHD17B     | 9:74601777        |
| 9.47                 | 1.37      | 4.76E-12 | ABCA6       | 17:67142616       | 0.324    | 0.023     | 4.57E-45  | ABI1        | 10:26675370       |
| -6.35                | 0.913     | 3.52E-12 | ABCA8       | 17:66879927       | 0.506    | 0.07      | 4.88E-13  | ABRA        | 8:107749502       |
| -0.757               | 0.0681    | 1.05E-28 | ABCC6       | 16:16515295       | 0.122    | 0.017     | 7.15E-13  | AC002472.13 | 22:21400619       |
| 0.872                | 0.0682    | 1.97E-37 | ABL2        | 1:179098770       | 0.0901   | 0.011     | 2.59E-16  | AC008686.1  | 19:14325845       |
| 0.702                | 0.0933    | 5.31E-14 | ABLIM3      | 5:148601243       | -0.158   | 0.0125    | 1.27E-36  | AC008686.1  | 19:13964816       |
| -2.93                | 0.463     | 2.48E-10 | AC002472.13 | 22:21400282       | 0.208    | 0.0133    | 3.94E-55  | AC008686.1  | 19:14274633       |
| -0.291               | 0.0279    | 1.81E-25 | AC008060.7  | 7:155195759       | 0.128    | 0.0129    | 3.32E-23  | AC008686.1  | 19:14259846       |
| -0.585               | 0.0831    | 1.93E-12 | AC009065.1  | 16:33048628       | -0.125   | 0.0162    | 1.20E-14  | AC009065.1  | 16:32849619       |
| -0.272               | 0.0293    | 1.64E-20 | AC010536.1  | 16:87764267       | 0.0576   | 0.00752   | 1.87E-14  | AC011239.1  | 2:241449578       |
| 2.44                 | 0.321     | 2.93E-14 | AC015688.3  | 17:25303954       | -0.213   | 0.00944   | 9.88E-113 | AC011239.1  | 2:235165520       |
| 3.22                 | 0.51      | 2.72E-10 | AC021218.2  | 7:155753306       | -0.00578 | 0.000875  | 3.96E-11  | AC015688.3  | 17:25303954       |
| -0.418               | 0.0495    | 3.05E-17 | AC021860.1  | 4:38612708        | -0.235   | 0.0344    | 8.41E-12  | AC015688.3  | 17:25303954       |
| -0.991               | 0.144     | 5.90E-12 | AC022498.1  | 3:187898523       | 0.287    | 0.0112    | 8.03E-145 | AC015688.3  | 17:25303954       |
| -1.47                | 0.201     | 2.60E-13 | AC022532.1  | 10:72209538       | 0.113    | 0.0149    | 3.35E-14  | AC015688.3  | 17:25303954       |
| 0.272                | 0.0369    | 1.69E-13 | AC104667.3  | 2:238499997       | 0.0233   | 0.00268   | 3.50E-18  | AC015688.3  | 17:25303954       |
| -0.149               | 0.0156    | 1.28E-21 | AC135178.1  | 17:8277215        | 0.175    | 0.0163    | 6.88E-27  | AC022498.1  | 3:187898523       |
| -0.754               | 0.109     | 4.60E-12 | AC142381.1  | 16:32157698       | -0.141   | 0.0092    | 5.12E-53  | AC022498.1  | 3:187898523       |
| -0.18                | 0.0251    | 7.43E-13 | ACACA       | 17:35845916       | 0.0697   | 0.00995   | 2.47E-12  | AC023469.1  | 2:151781053       |
| 6.52                 | 0.847     | 1.38E-14 | ACAP2       | 3:195076877       | -0.105   | 0.0136    | 1.16E-14  | AC090186.1  | 8:5217941         |
| -3.59                | 0.431     | 8.12E-17 | ACBD3       | 1:226352498       | -0.0811  | 0.0104    | 6.29E-15  | AC114783.1  | 2:127505482       |
| -4.21                | 0.677     | 5.02E-10 | ACCS        | 11:44096238       | 0.275    | 0.0301    | 6.47E-20  | AC136604.1  | 5:178945856       |
| -1.79                | 0.229     | 5.43E-15 | ACOT1       | 14:74006855       | -0.75    | 0.0442    | 1.41E-64  | AC140481.2  | 2:130853936       |
| 0.193                | 0.0219    | 1.22E-18 | ACOT2       | 14:73972535       | -0.18    | 0.0193    | 1.10E-20  | AC142381.1  | 16:33047273       |
| 2.27                 | 0.297     | 2.12E-14 | ACOT4       | 14:74073492       | 0.116    | 0.015     | 1.05E-14  | AC142381.1  | 16:33047273       |
| -0.208               | 0.0315    | 4.02E-11 | ACOT6       | 14:74095256       | -0.144   | 0.0145    | 3.05E-23  | AC142381.1  | 16:33047273       |
| -0.845               | 0.104     | 4.47E-16 | ACPP        | 3:132057834       | 0.179    | 0.0191    | 7.14E-21  | AC142381.1  | 16:33047273       |
| -0.747               | 0.11      | 1.11E-11 | ACSM2A      | 16:20420488       | 0.0217   | 0.00306   | 1.33E-12  | AC142381.1  | 16:33047273       |
| -3.24                | 0.333     | 2.25E-22 | ACTR3C      | 7:149963399       | -0.216   | 0.0256    | 3.24E-17  | AC145676.2  | 7:100937654       |
| -1.39                | 0.176     | 2.84E-15 | ACY3        | 11:67414828       | 0.345    | 0.0483    | 9.14E-13  | AC145676.2  | 7:120266824       |
| -0.124               | 0.0159    | 6.25E-15 | ADAD2       | 16:84208891       | -0.262   | 0.0343    | 2.20E-14  | AC145676.2  | 7:100937654       |
| 0.211                | 0.0309    | 8.58E-12 | ADAL        | 15:43629310       | -0.265   | 0.0198    | 7.52E-41  | ACBD3       | 1:226327483       |

|        |        |          |            |              |         |         |           |            |              |
|--------|--------|----------|------------|--------------|---------|---------|-----------|------------|--------------|
| 3.31   | 0.451  | 2.15E-13 | ADAMTS13   | 9:136218590  | -0.172  | 0.0224  | 1.61E-14  | ACCSL      | 11:44270522  |
| -0.203 | 0.0296 | 6.98E-12 | ADAMTS14   | 10:72423243  | 0.268   | 0.0236  | 6.93E-30  | ACCSL      | 11:44340570  |
| -0.725 | 0.0621 | 1.72E-31 | ADAMTS18   | 16:77390128  | -0.187  | 0.00905 | 7.46E-95  | ACCSL      | 11:44270522  |
| -1.32  | 0.104  | 6.52E-37 | ADAT1      | 16:75572713  | 0.117   | 0.0156  | 6.38E-14  | ACOT1      | 14:73972289  |
| -1.01  | 0.157  | 1.25E-10 | ADCY4      | 14:24775846  | -0.22   | 0.0323  | 9.68E-12  | ACP1       | 2:100182584  |
| -0.219 | 0.0309 | 1.37E-12 | ADHFE1     | 8:67378564   | 0.248   | 0.0331  | 6.76E-14  | ACSF3      | 16:90158184  |
| -2.28  | 0.214  | 1.67E-26 | ADORA2B    | 17:15876655  | -0.228  | 0.0311  | 2.28E-13  | ACSF3      | 16:90158184  |
| 1.76   | 0.177  | 2.69E-23 | AEBP1      | 7:44143124   | -0.447  | 0.0517  | 5.33E-18  | ADAM2      | 8:39233892   |
| 3.61   | 0.413  | 2.31E-18 | AGA        | 4:178363378  | 0.181   | 0.0182  | 2.65E-23  | ADAMTS18   | 16:77392867  |
| 4.98   | 0.726  | 6.91E-12 | AGAP10     | 10:48235892  | -0.592  | 0.0307  | 7.41E-83  | ADAMTS18   | 16:77390996  |
| -0.364 | 0.0477 | 2.33E-14 | AGAP4      | 10:46320813  | -0.799  | 0.0275  | 1.35E-185 | ADRB3      | 8:3881249    |
| 0.203  | 0.0327 | 5.37E-10 | AGAP7      | 10:51346756  | 1.26    | 0.0613  | 6.99E-94  | AFMID      | 17:75535140  |
| 0.242  | 0.0341 | 1.28E-12 | AGAP9      | 10:48235892  | -0.419  | 0.0378  | 1.49E-28  | AGAP10     | 10:48235892  |
| -0.14  | 0.0218 | 1.34E-10 | AHI1       | 6:135623833  | -0.306  | 0.0329  | 1.39E-20  | AGAP4      | 10:46308566  |
| 0.217  | 0.024  | 1.54E-19 | AHSP       | 16:32105098  | 1.5     | 0.205   | 2.53E-13  | AGAP4      | 10:46320813  |
| -0.234 | 0.0321 | 3.11E-13 | AIDA       | 1:222825088  | 0.149   | 0.0168  | 7.38E-19  | AGAP4      | 10:46320813  |
| -0.155 | 0.0244 | 2.12E-10 | AIFM2      | 10:71900246  | -0.184  | 0.0159  | 5.69E-31  | AGAP7      | 10:51223750  |
| -1.57  | 0.244  | 1.24E-10 | AK5        | 1:78025230   | -0.187  | 0.0257  | 3.43E-13  | AGAP7      | 10:51570152  |
| 0.508  | 0.0798 | 1.94E-10 | AK8        | 9:135713638  | 0.184   | 0.0269  | 7.91E-12  | AGAP7      | 10:51541635  |
| -1.21  | 0.189  | 1.53E-10 | AKR1C1     | 10:4982779   | 0.344   | 0.0371  | 1.82E-20  | AGBL3      | 7:135017101  |
| -2.19  | 0.33   | 3.22E-11 | AKR1CL1    | 10:42602860  | -0.204  | 0.0284  | 6.81E-13  | AGMAT      | 1:149594238  |
| 1.58   | 0.235  | 1.78E-11 | AL049840.1 | 14:104083434 | 0.083   | 0.0107  | 8.70E-15  | AHR        | 7:17247167   |
| 2.37   | 0.38   | 4.46E-10 | AL050302.1 | 21:14472722  | -0.324  | 0.0257  | 1.93E-36  | AHR        | 7:18284237   |
| -2.03  | 0.299  | 1.13E-11 | AL139099.1 | 14:50066542  | -0.108  | 0.0139  | 7.86E-15  | AHSP       | 16:32138743  |
| -0.622 | 0.0958 | 8.43E-11 | AL353791.1 | 9:40585357   | 0.152   | 0.0193  | 3.39E-15  | AICDA      | 12:85427047  |
| -3.3   | 0.509  | 8.97E-11 | AL445665.1 | 9:70570952   | 0.508   | 0.0185  | 5.36E-166 | AICDA      | 12:78330     |
| -4.3   | 0.661  | 7.75E-11 | AL590822.1 | 1:121113600  | -0.826  | 0.107   | 1.17E-14  | AIPL1      | 17:55555888  |
| -0.193 | 0.0277 | 3.23E-12 | AL592284.1 | 1:144521099  | -0.197  | 0.0166  | 1.75E-32  | AIPL1      | 17:62990309  |
| 0.728  | 0.0458 | 6.84E-57 | ALDH8A1    | 6:135320063  | -0.315  | 0.0194  | 2.76E-59  | AKIP1      | 11:94860472  |
| 1.11   | 0.134  | 1.20E-16 | ALG1L      | 3:125733081  | -0.469  | 0.0296  | 1.53E-56  | AKIP1      | 11:89709864  |
| 1.43   | 0.199  | 6.68E-13 | ALLC       | 2:3624799    | 0.679   | 0.017   | <1.0E-314 | AKR1CL1    | 10:42602860  |
| 1.15   | 0.142  | 5.56E-16 | ALOX12     | 17:6903944   | -0.0411 | 0.00578 | 1.15E-12  | AKR1CL1    | 10:42602860  |
| -0.652 | 0.104  | 3.63E-10 | ALPK3      | 15:85264067  | 0.0579  | 0.00846 | 7.70E-12  | AKR1CL1    | 10:42602860  |
| -0.853 | 0.0592 | 4.56E-47 | ALS2CL     | 3:46719486   | 0.218   | 0.0235  | 1.75E-20  | AKR1CL1    | 10:42602860  |
| -0.713 | 0.107  | 2.67E-11 | AMACR      | 5:34004707   | 0.228   | 0.0177  | 5.73E-38  | AKR1CL1    | 10:42602860  |
| -0.763 | 0.113  | 1.46E-11 | ANAPC4     | 4:25374371   | -0.104  | 0.0151  | 5.68E-12  | AKT1       | 14:106128340 |
| -4.38  | 0.474  | 2.45E-20 | ANGPTL7    | 1:11088781   | 0.243   | 0.0187  | 1.31E-38  | AKT1       | 14:106128340 |
| 3.38   | 0.386  | 2.01E-18 | ANKK1      | 11:113187949 | 0.214   | 0.0144  | 5.89E-50  | AL050302.1 | 21:14472722  |
| 5.29   | 0.662  | 1.34E-15 | ANKRD20A4  | 9:69476094   | 0.498   | 0.0203  | 6.73E-133 | AL050302.1 | 21:14472722  |

|        |        |           |             |              |         |         |          |            |              |
|--------|--------|-----------|-------------|--------------|---------|---------|----------|------------|--------------|
| 7.85   | 1.24   | 2.44E-10  | ANKRD30BL   | 2:133018360  | -0.415  | 0.0451  | 3.52E-20 | AL050302.1 | 21:14566779  |
| 0.362  | 0.052  | 3.37E-12  | ANKRD36     | 2:98166631   | 0.163   | 0.0231  | 1.71E-12 | AL138764.1 | 10:135460942 |
| 0.174  | 0.0266 | 6.10E-11  | ANKS1A      | 6:35009196   | -0.105  | 0.0143  | 2.09E-13 | AL138764.1 | 10:135474118 |
| 0.159  | 0.0203 | 4.78E-15  | ANKS3       | 16:46483083  | -2.15   | 0.314   | 7.53E-12 | AL138764.1 | 10:135456218 |
| 0.532  | 0.0629 | 2.72E-17  | ANO7        | 2:242157087  | 0.423   | 0.0236  | 7.70E-72 | AL354898.1 | 9:133003291  |
| 0.398  | 0.0317 | 3.72E-36  | ANXA9       | 1:150945607  | -0.0959 | 0.0112  | 1.10E-17 | AL354898.1 | 9:133038642  |
| 0.769  | 0.0966 | 1.71E-15  | AP000350.4  | 22:24266726  | 0.125   | 0.00757 | 2.98E-61 | AL354993.1 | 20:51661874  |
| -0.194 | 0.0268 | 4.53E-13  | AP003068.23 | 11:64944182  | -0.243  | 0.0153  | 8.40E-57 | AL354993.1 | 20:51661874  |
| 3.1    | 0.475  | 6.74E-11  | AP3D1       | 19:2106333   | -0.142  | 0.0141  | 7.43E-24 | AL359878.1 | 10:17859923  |
| -2.15  | 0.205  | 9.83E-26  | APOA1BP     | 1:156552711  | -0.186  | 0.0164  | 8.18E-30 | AL359878.1 | 10:18111461  |
| -1.64  | 0.0669 | 1.04E-132 | APOL2       | 22:36635756  | -0.141  | 0.0213  | 3.60E-11 | AL445665.1 | 9:70570952   |
| -2.3   | 0.234  | 8.44E-23  | ARHGAP25    | 2:68962137   | -0.221  | 0.0185  | 6.82E-33 | AL445665.1 | 9:70570952   |
| -2.35  | 0.295  | 1.64E-15  | ARHGAP26    | 5:142604421  | -0.129  | 0.0181  | 1.03E-12 | AL445665.1 | 9:68777951   |
| -2.26  | 0.199  | 6.86E-30  | ARHGEF16    | 1:3353890    | -0.233  | 0.0357  | 6.73E-11 | AL445989.1 | 13:65314986  |
| -3.42  | 0.283  | 1.27E-33  | ARHGEF3     | 3:56767673   | 0.206   | 0.0293  | 2.05E-12 | AL590822.1 | 1:121113600  |
| 0.543  | 0.0704 | 1.23E-14  | ARHGEF35    | 7:143870422  | -0.0582 | 0.00657 | 8.11E-19 | AL590822.1 | 1:121113600  |
| -5.44  | 0.862  | 2.77E-10  | ARID3C      | 9:34623718   | 0.125   | 0.0148  | 3.02E-17 | AL590822.1 | 1:121113600  |
| -0.79  | 0.0989 | 1.37E-15  | ARL16       | 17:79649515  | -0.255  | 0.0262  | 2.18E-22 | AL590822.1 | 1:145247557  |
| 1.51   | 0.168  | 2.52E-19  | ARL17A      | 17:44173215  | 0.503   | 0.0343  | 1.08E-48 | AL590822.1 | 1:121113600  |
| 2.02   | 0.27   | 7.35E-14  | ARL17B      | 17:44443036  | -0.461  | 0.0353  | 5.61E-39 | ALG1L      | 3:125765603  |
| -0.804 | 0.126  | 1.76E-10  | ARL8B       | 3:5201615    | -0.122  | 0.0115  | 2.72E-26 | ALLC       | 2:3624799    |
| 0.234  | 0.0298 | 4.08E-15  | ARSB        | 5:78160933   | -0.0859 | 0.0122  | 1.91E-12 | ALLC       | 2:3624799    |
| -0.271 | 0.0336 | 7.30E-16  | ART4        | 12:158028    | -0.208  | 0.0309  | 1.68E-11 | ALLC       | 2:3624799    |
| -0.625 | 0.0975 | 1.45E-10  | ART5        | 11:3663220   | 0.0979  | 0.00967 | 4.32E-24 | ALPI       | 2:233291956  |
| -0.254 | 0.0364 | 2.99E-12  | ARTN        | 1:44394983   | -0.185  | 0.0206  | 2.69E-19 | ALPK2      | 18:56311186  |
| -0.793 | 0.0641 | 3.74E-35  | AS3MT       | 10:104611764 | -0.268  | 0.0253  | 3.22E-26 | AMACR      | 5:34004707   |
| 1.11   | 0.166  | 2.28E-11  | ASB1        | 2:239345394  | -0.205  | 0.0212  | 4.05E-22 | ANKLE2     | 12:133833832 |
| -1.45  | 0.23   | 2.89E-10  | ASB5        | 4:177155788  | 0.0585  | 0.00854 | 7.38E-12 | ANKRD20A4  | 9:69476094   |
| 1.72   | 0.226  | 2.73E-14  | ASB8        | 12:48548342  | 0.0848  | 0.0128  | 3.47E-11 | ANKRD20A4  | 9:69482227   |
| 7.86   | 0.975  | 7.53E-16  | ASRGL1      | 11:62162389  | 0.27    | 0.0337  | 1.13E-15 | ANKS3      | 16:46465847  |
| 1.04   | 0.138  | 4.84E-14  | ATF6        | 1:161926569  | -0.117  | 0.0104  | 2.32E-29 | ANKS3      | 16:46483083  |
| -0.285 | 0.0439 | 8.47E-11  | ATG16L1     | 2:234207828  | -0.133  | 0.0158  | 3.84E-17 | ANKS3      | 16:46483083  |
| -1.18  | 0.182  | 8.96E-11  | ATP10B      | 5:160244938  | -0.207  | 0.0255  | 4.75E-16 | ANKS3      | 16:46483083  |
| 0.843  | 0.121  | 3.24E-12  | ATP5S       | 14:50783898  | -0.181  | 0.0175  | 4.51E-25 | ANKS3      | 16:46483083  |
| -6.31  | 0.964  | 5.92E-11  | ATP6V0B     | 1:44443874   | -0.437  | 0.0394  | 1.38E-28 | AP3D1      | 19:24531262  |
| 0.19   | 0.0238 | 1.43E-15  | ATP6V1E2    | 2:46760263   | -0.121  | 0.0152  | 1.71E-15 | AP3D1      | 19:27829622  |
| 2.51   | 0.394  | 1.88E-10  | ATRIP       | 3:48487795   | -0.115  | 0.0161  | 9.14E-13 | AP3D1      | 19:27829622  |
| 0.384  | 0.0501 | 1.79E-14  | ATRN        | 20:3622772   | -0.0974 | 0.0126  | 1.07E-14 | APBA3      | 19:35742760  |
| -2.33  | 0.371  | 3.38E-10  | ATXN7L3B    | 12:74934945  | -0.207  | 0.0174  | 1.23E-32 | APOF       | 12:56657216  |

|        |        |           |            |              |         |         |          |          |              |
|--------|--------|-----------|------------|--------------|---------|---------|----------|----------|--------------|
| 0.163  | 0.0216 | 4.48E-14  | AVP        | 20:25835641  | -2.83   | 0.286   | 4.37E-23 | APOF     | 12:56747778  |
| -0.6   | 0.0768 | 5.61E-15  | B3GNTL1    | 17:81009636  | -0.234  | 0.03    | 6.19E-15 | APOH     | 17:63933653  |
| -0.287 | 0.0231 | 1.93E-35  | B4GALT7    | 5:177032050  | -0.201  | 0.0178  | 1.44E-29 | APOH     | 17:64405875  |
| -2.32  | 0.306  | 3.41E-14  | BAALC      | 8:104129424  | 0.14    | 0.0209  | 2.10E-11 | AQP10    | 1:154835734  |
| 0.563  | 0.0846 | 2.84E-11  | BAAT       | 9:104146951  | -0.156  | 0.0175  | 4.91E-19 | AQP10    | 1:15509852   |
| 0.17   | 0.0202 | 3.90E-17  | BATF3      | 1:212873074  | 0.244   | 0.0351  | 3.61E-12 | AQP10    | 1:154835734  |
| -1.73  | 0.273  | 2.34E-10  | BBS9       | 7:33194826   | -0.093  | 0.0142  | 5.78E-11 | ARL17B   | 17:44409787  |
| -0.387 | 0.0549 | 1.80E-12  | BCR        | 22:23652201  | -0.239  | 0.0176  | 5.30E-42 | ARMC10   | 7:102217297  |
| -0.221 | 0.0303 | 3.01E-13  | BHLHA9     | 17:21526192  | -1.58   | 0.209   | 4.04E-14 | ARMC10   | 7:102217297  |
| -0.599 | 0.0405 | 1.70E-49  | BHMT       | 5:78411324   | -0.144  | 0.0123  | 1.17E-31 | ART4     | 12:158028    |
| -0.846 | 0.126  | 1.89E-11  | BIN3       | 8:22525980   | -0.129  | 0.0148  | 2.88E-18 | ART4     | 12:158028    |
| 1.25   | 0.116  | 4.48E-27  | BIRC7      | 20:61870075  | 0.108   | 0.0134  | 7.65E-16 | ART4     | 12:158028    |
| 1.26   | 0.192  | 5.29E-11  | BIVM       | 13:103477485 | 0.0737  | 0.0109  | 1.37E-11 | ART4     | 12:158028    |
| -0.192 | 0.0157 | 2.17E-34  | BLMH       | 17:28588401  | -0.104  | 0.0103  | 5.69E-24 | AS3MT    | 10:104623053 |
| -0.432 | 0.0536 | 7.65E-16  | BLOC1S2    | 10:101908193 | -0.337  | 0.0319  | 4.36E-26 | ASB16    | 17:41382047  |
| -0.313 | 0.0451 | 3.92E-12  | BLVRA      | 7:43823125   | -0.0884 | 0.0131  | 1.50E-11 | ASB16    | 17:41463753  |
| 0.557  | 0.0637 | 2.25E-18  | BNIP1      | 5:172591337  | -0.152  | 0.018   | 3.05E-17 | ATG14    | 14:56654212  |
| -0.256 | 0.041  | 4.27E-10  | BPHL       | 6:3138194    | 0.165   | 0.0184  | 3.04E-19 | ATXN7L3B | 12:75271460  |
| 0.35   | 0.0495 | 1.54E-12  | BSND       | 1:55468040   | 0.0241  | 0.00283 | 1.65E-17 | ATXN7L3B | 12:74934945  |
| -1.34  | 0.135  | 3.21E-23  | BSPRY      | 9:116085602  | 0.237   | 0.0152  | 8.24E-55 | AUH      | 9:93180398   |
| -1.07  | 0.0437 | 2.13E-132 | BTBD1      | 15:83792713  | -0.214  | 0.0171  | 6.21E-36 | AVP      | 20:25835641  |
| -0.89  | 0.135  | 4.32E-11  | BTN2A2     | 6:26384669   | 0.189   | 0.0266  | 1.20E-12 | AVP      | 20:25835641  |
| -1.25  | 0.2    | 4.10E-10  | BTNL3      | 5:180430797  | 0.0846  | 0.00413 | 2.97E-93 | AVP      | 20:25835641  |
| -2.2   | 0.191  | 1.07E-30  | BTNL9      | 5:180485949  | 0.256   | 0.0378  | 1.27E-11 | AVP      | 20:25835641  |
| -1.14  | 0.135  | 3.05E-17  | BX255923.1 | 9:68711007   | -0.262  | 0.0399  | 5.15E-11 | AVP      | 20:25835641  |
| -0.893 | 0.133  | 1.89E-11  | C10orf107  | 10:63422876  | 0.434   | 0.0282  | 1.91E-53 | BCCIP    | 10:127583983 |
| -0.756 | 0.0463 | 6.21E-60  | C10orf82   | 10:118429887 | -0.106  | 0.0137  | 1.02E-14 | BCR      | 22:23660893  |
| -1.24  | 0.192  | 1.06E-10  | C12orf60   | 12:14965332  | -0.152  | 0.0131  | 3.98E-31 | BCR      | 22:23661565  |
| -1.02  | 0.132  | 1.10E-14  | C12orf73   | 12:104385191 | -0.155  | 0.021   | 1.57E-13 | BHLHA9   | 17:21526192  |
| -0.521 | 0.0808 | 1.13E-10  | C14orf166  | 14:52471263  | -0.218  | 0.0259  | 3.86E-17 | BHLHA9   | 17:21526192  |
| -0.408 | 0.0621 | 5.03E-11  | C14orf178  | 14:78124797  | 0.138   | 0.0173  | 1.50E-15 | BHLHA9   | 17:21526192  |
| -0.185 | 0.0212 | 2.63E-18  | C15orf38   | 15:90448376  | 0.11    | 0.0171  | 1.25E-10 | BHLHA9   | 17:21526192  |
| -0.42  | 0.0643 | 6.49E-11  | C15orf57   | 15:40930449  | 0.115   | 0.0125  | 3.58E-20 | BHLHA9   | 17:21526192  |
| -0.312 | 0.0458 | 9.61E-12  | C16orf3    | 16:90103087  | 0.0154  | 0.00225 | 7.68E-12 | BHLHE23  | 20:61925237  |
| -0.529 | 0.0354 | 1.72E-50  | C16orf59   | 16:33941694  | -2.8    | 0.357   | 4.39E-15 | BLOC1S2  | 10:101908193 |
| -0.732 | 0.108  | 1.22E-11  | C16orf93   | 16:30747191  | -0.212  | 0.0274  | 1.02E-14 | BLOC1S5  | 6:7457640    |
| -0.14  | 0.0207 | 1.35E-11  | C17orf50   | 17:34091078  | 0.0999  | 0.0143  | 2.83E-12 | BLOC1S5  | 6:90595698   |
| -10.5  | 1.42   | 1.42E-13  | C17orf67   | 17:54911028  | 0.332   | 0.031   | 9.17E-27 | BPIFC    | 22:32894025  |
| -0.941 | 0.0924 | 2.34E-24  | C17orf70   | 17:79506890  | -0.168  | 0.0232  | 4.44E-13 | BPIFC    | 22:32894025  |

|        |        |          |           |             |         |         |           |                 |             |
|--------|--------|----------|-----------|-------------|---------|---------|-----------|-----------------|-------------|
| 1.06   | 0.0918 | 7.66E-31 | C19orf53  | 19:13884469 | -0.138  | 0.021   | 4.98E-11  | BPNT1           | 1:220133673 |
| 1.16   | 0.124  | 8.37E-21 | C19orf83  | 19:46145025 | -0.054  | 0.00817 | 3.85E-11  | BTNL3           | 5:180430797 |
| 9      | 1.38   | 6.95E-11 | C19orf84  | 19:51894327 | 0.0872  | 0.00985 | 8.54E-19  | BTNL3           | 5:180455372 |
| -5.85  | 0.722  | 5.38E-16 | C1orf194  | 1:109645420 | -0.439  | 0.0559  | 4.05E-15  | BVES            | 6:104902232 |
| -0.136 | 0.0207 | 5.03E-11 | C1orf195  | 1:145312917 | 0.156   | 0.0192  | 4.47E-16  | BX255923.1      | 9:68711007  |
| -0.22  | 0.0319 | 5.33E-12 | C1orf204  | 1:159823363 | -0.136  | 0.0171  | 1.82E-15  | C14orf1         | 14:75861238 |
| 0.636  | 0.0917 | 4.04E-12 | C1QTNF6   | 22:37580334 | -0.238  | 0.027   | 1.20E-18  | C14orf178       | 14:78156031 |
| -2.65  | 0.318  | 7.86E-17 | C1QTNF9B  | 13:24514619 | 0.3     | 0.0268  | 4.36E-29  | C14orf178       | 14:78121942 |
| 2.28   | 0.324  | 1.96E-12 | C21orf128 | 21:43519470 | 0.331   | 0.0213  | 1.86E-54  | C16orf59        | 16:33941694 |
| -0.707 | 0.114  | 5.58E-10 | C22orf34  | 22:50033362 | 0.21    | 0.0217  | 3.76E-22  | C16orf59        | 16:33941694 |
| -3.22  | 0.422  | 2.34E-14 | C2orf27B  | 2:133011215 | -0.432  | 0.0644  | 1.97E-11  | C16orf59        | 16:33941694 |
| 2.96   | 0.413  | 7.66E-13 | C2orf40   | 2:106687456 | -0.261  | 0.0293  | 5.20E-19  | C16orf59        | 16:33991563 |
| 1.42   | 0.106  | 6.36E-41 | C2orf74   | 2:61379625  | 0.469   | 0.0165  | 1.01E-177 | C16orf59        | 16:33991563 |
| -0.126 | 0.0178 | 1.46E-12 | C2orf82   | 2:233735693 | 0.612   | 0.0426  | 8.43E-47  | C16orf87        | 16:46402985 |
| -0.402 | 0.0424 | 2.52E-21 | C4orf6    | 4:49242504  | -0.121  | 0.0158  | 1.89E-14  | C16orf87        | 16:46402985 |
| -3.57  | 0.488  | 2.56E-13 | C5orf17   | 5:24091732  | 0.304   | 0.0224  | 5.92E-42  | C16orf87        | 16:46402985 |
| -5.85  | 0.877  | 2.55E-11 | C6orf195  | 6:2614822   | 0.046   | 0.00533 | 6.11E-18  | C16orf92        | 16:29065793 |
| -0.371 | 0.0403 | 3.39E-20 | C6orf229  | 6:25647375  | -0.4    | 0.0568  | 1.89E-12  | C16orf92        | 16:29065793 |
| 0.246  | 0.0306 | 9.04E-16 | C6orf57   | 6:71291014  | -0.224  | 0.0347  | 1.08E-10  | C17orf105       | 17:41382047 |
| 1.05   | 0.132  | 1.80E-15 | C7orf13   | 7:156429648 | -0.267  | 0.0145  | 1.02E-75  | C17orf61-PLSCR3 | 17:81131315 |
| 0.932  | 0.123  | 3.53E-14 | C7orf73   | 7:135349273 | 0.151   | 0.0206  | 2.30E-13  | C17orf80        | 17:71333186 |
| 0.25   | 0.036  | 3.80E-12 | C8orf31   | 8:144125300 | 0.258   | 0.0344  | 6.38E-14  | C1orf100        | 1:245201465 |
| -0.613 | 0.0952 | 1.20E-10 | C8orf58   | 8:22457804  | 0.109   | 0.0162  | 1.72E-11  | C1orf174        | 1:3578444   |
| -0.303 | 0.0346 | 2.00E-18 | C9orf142  | 9:139883948 | 0.147   | 0.0228  | 1.14E-10  | C1orf195        | 1:148849427 |
| -0.245 | 0.028  | 2.13E-18 | C9orf152  | 9:113007289 | -0.0295 | 0.00372 | 2.19E-15  | C1orf195        | 1:148849427 |
| -0.271 | 0.0294 | 3.04E-20 | C9orf72   | 9:27565936  | -0.148  | 0.0177  | 6.19E-17  | C1orf195        | 1:148849427 |
| 0.296  | 0.0451 | 5.27E-11 | C9orf89   | 9:95875575  | 0.168   | 0.0186  | 1.68E-19  | C1orf195        | 1:148849427 |
| -0.794 | 0.106  | 6.86E-14 | CA12      | 15:63682331 | 0.817   | 0.0648  | 1.91E-36  | C1orf195        | 1:149024078 |
| -0.181 | 0.0284 | 1.85E-10 | CA5A      | 16:87935184 | 0.107   | 0.0145  | 1.59E-13  | C20orf196       | 20:59849622 |
| 0.221  | 0.0312 | 1.41E-12 | CA9       | 9:35884027  | -2.02   | 0.314   | 1.25E-10  | C21orf128       | 21:43526509 |
| -1.49  | 0.175  | 1.68E-17 | CAB39L    | 13:49945410 | 0.214   | 0.0193  | 1.43E-28  | C21orf128       | 21:43529428 |
| 1.63   | 0.169  | 5.16E-22 | CABYR     | 18:21760784 | 0.141   | 0.022   | 1.46E-10  | C2orf27B        | 2:132797395 |
| 2.44   | 0.369  | 3.78E-11 | CACNG6    | 19:54514785 | 0.148   | 0.0148  | 1.52E-23  | C2orf27B        | 2:133015374 |
| -0.257 | 0.0311 | 1.41E-16 | CAMLG     | 5:134005332 | 0.444   | 0.0282  | 7.47E-56  | C2orf27B        | 2:133018682 |
| 2.56   | 0.412  | 5.18E-10 | CAPN11    | 6:44134581  | 0.0459  | 0.00613 | 7.01E-14  | C2orf27B        | 2:133015374 |
| -0.615 | 0.0831 | 1.35E-13 | CAPN8     | 1:223812933 | -0.154  | 0.0169  | 8.06E-20  | C2orf27B        | 2:133021477 |
| 0.269  | 0.0416 | 1.00E-10 | CAPN9     | 1:230891248 | 0.161   | 0.015   | 7.10E-27  | C2orf74         | 2:61400816  |
| -0.134 | 0.0145 | 2.43E-20 | CASP16    | 16:34015836 | 0.321   | 0.0449  | 8.73E-13  | C2orf74         | 2:61385100  |
| -4.21  | 0.519  | 4.99E-16 | CASQ1     | 1:160162959 | -0.329  | 0.0251  | 2.98E-39  | C2orf82         | 2:233735693 |



|        |        |          |               |              |         |         |           |          |             |
|--------|--------|----------|---------------|--------------|---------|---------|-----------|----------|-------------|
| -4.56  | 0.359  | 5.77E-37 | CAT           | 11:34459717  | 0.185   | 0.0285  | 8.51E-11  | C3orf65  | 3:186339617 |
| 5.35   | 0.364  | 6.66E-49 | CBLN3         | 14:24899473  | 0.544   | 0.0314  | 3.06E-67  | C3orf65  | 3:186339617 |
| 3.23   | 0.271  | 9.44E-33 | CBR3          | 21:37513596  | -0.183  | 0.028   | 6.33E-11  | C4orf6   | 4:49242504  |
| -1.77  | 0.281  | 3.00E-10 | CBWD2         | 2:114207406  | -0.185  | 0.0165  | 3.56E-29  | C4orf6   | 4:49242504  |
| 7.31   | 0.774  | 3.57E-21 | CCBL2         | 1:89426277   | -0.301  | 0.0223  | 1.61E-41  | C4orf6   | 4:49242504  |
| -0.264 | 0.0309 | 1.30E-17 | CCDC103       | 17:42916399  | 0.27    | 0.0286  | 3.71E-21  | C4orf6   | 4:49242504  |
| -0.463 | 0.0712 | 7.88E-11 | CCDC110       | 4:186401223  | -0.144  | 0.0191  | 4.73E-14  | C4orf6   | 4:49242504  |
| 2.18   | 0.301  | 4.40E-13 | CCDC13        | 3:42814668   | 0.174   | 0.0205  | 2.11E-17  | C6orf201 | 6:45545843  |
| -2.18  | 0.301  | 4.40E-13 | CCDC144NL     | 17:20827039  | 0.0894  | 0.00939 | 1.72E-21  | C6orf229 | 6:25647375  |
| 0.165  | 0.0214 | 1.26E-14 | CCDC163P      | 1:45969036   | -0.576  | 0.0225  | 1.53E-144 | C6orf229 | 6:25647375  |
| -0.124 | 0.0199 | 4.63E-10 | CCDC169-SOHLF | 13:36802672  | 0.016   | 0.00198 | 6.43E-16  | C6orf229 | 6:25647375  |
| -0.162 | 0.0202 | 1.06E-15 | CCDC170       | 6:151815864  | 0.123   | 0.019   | 9.56E-11  | C6orf229 | 6:25647375  |
| 0.554  | 0.0609 | 9.30E-20 | CCDC173       | 2:170463156  | -0.621  | 0.0304  | 9.50E-93  | C6orf229 | 6:25647375  |
| 0.183  | 0.0265 | 5.00E-12 | CCDC181       | 1:169373833  | -0.203  | 0.0268  | 3.60E-14  | C6orf47  | 6:31421567  |
| -0.597 | 0.0778 | 1.67E-14 | CCDC23        | 1:43233484   | 0.2     | 0.0186  | 5.76E-27  | C7orf13  | 7:156429648 |
| -0.12  | 0.0184 | 6.95E-11 | CCDC25        | 8:27617390   | 0.144   | 0.0208  | 4.42E-12  | C7orf34  | 7:142459962 |
| 0.473  | 0.0622 | 2.86E-14 | CCDC40        | 17:78021037  | 0.442   | 0.0208  | 3.30E-100 | C7orf34  | 7:142461940 |
| -0.721 | 0.109  | 3.72E-11 | CCDC66        | 3:56579538   | -0.133  | 0.0146  | 8.27E-20  | C8orf86  | 8:38470006  |
| -0.383 | 0.0528 | 4.05E-13 | CCDC8         | 19:46938483  | -0.17   | 0.0229  | 1.14E-13  | C9orf171 | 9:136370017 |
| -2.16  | 0.314  | 6.03E-12 | CCDC82        | 11:96108105  | 0.177   | 0.0227  | 6.32E-15  | CACTIN   | 19:27866520 |
| -0.489 | 0.0415 | 4.77E-32 | CCL3L3        | 17:34728537  | 0.906   | 0.0404  | 2.21E-111 | CACTIN   | 19:27866520 |
| -0.947 | 0.145  | 6.53E-11 | CCNO          | 5:54498792   | -0.318  | 0.0395  | 8.24E-16  | CACTIN   | 19:27866520 |
| -1.36  | 0.215  | 2.52E-10 | CCZ1          | 7:6884764    | 0.324   | 0.0143  | 1.18E-113 | CADM2    | 3:84159305  |
| 0.71   | 0.109  | 7.33E-11 | CD274         | 9:5460801    | -0.0942 | 0.014   | 1.71E-11  | CALML5   | 10:46946870 |
| 1.05   | 0.163  | 1.18E-10 | CD52          | 1:26645666   | -0.483  | 0.0477  | 4.25E-24  | CAMLG    | 5:134005332 |
| -0.693 | 0.0898 | 1.19E-14 | CD6           | 11:60776209  | -0.31   | 0.0137  | 2.31E-113 | CAMLG    | 5:133916719 |
| -0.541 | 0.0263 | 5.06E-94 | CD82          | 11:44626461  | 0.238   | 0.0365  | 7.01E-11  | CASP16   | 16:34015836 |
| -0.637 | 0.0812 | 4.34E-15 | CDA           | 1:20934283   | 0.349   | 0.0341  | 1.39E-24  | CASP16   | 16:34015836 |
| 0.315  | 0.0433 | 3.47E-13 | CDC25B        | 20:3792226   | 0.0874  | 0.0128  | 8.60E-12  | CASP16   | 16:34015836 |
| 5.08   | 0.673  | 4.41E-14 | CDC37L1       | 9:45769289   | 1.24    | 0.186   | 2.62E-11  | CASP16   | 16:34015836 |
| 2.8    | 0.366  | 2.01E-14 | CDC7          | 1:92021650   | -0.137  | 0.0162  | 2.75E-17  | CASP16   | 16:34015836 |
| -3.4   | 0.493  | 5.33E-12 | CDH9          | 5:26978780   | -0.228  | 0.0257  | 7.21E-19  | CBLN3    | 14:24899473 |
| -0.353 | 0.0545 | 9.35E-11 | CDHR1         | 10:85954220  | 0.331   | 0.0168  | 2.06E-86  | CBWD2    | 2:114264918 |
| -0.199 | 0.0311 | 1.57E-10 | CDHR3         | 7:105545505  | 0.126   | 0.0162  | 7.38E-15  | CCDC163P | 1:45976587  |
| -0.528 | 0.034  | 2.19E-54 | CDK10         | 16:89744756  | 0.188   | 0.0257  | 2.57E-13  | CCDC163P | 1:45969036  |
| -0.676 | 0.101  | 2.19E-11 | CDK13         | 7:40060751   | 0.0872  | 0.0135  | 1.05E-10  | CCDC163P | 1:45999773  |
| 0.62   | 0.0997 | 5.01E-10 | CDK19         | 6:111038433  | 0.132   | 0.0174  | 3.29E-14  | CCDC163P | 1:45976263  |
| -2.22  | 0.343  | 9.65E-11 | CDON          | 11:125843140 | 0.165   | 0.0106  | 1.24E-54  | CCDC173  | 2:170528009 |
| -1.31  | 0.149  | 1.47E-18 | CEACAM19      | 19:45165912  | 0.261   | 0.0329  | 2.14E-15  | CCDC173  | 2:170519369 |

|        |        |          |            |              |         |         |          |         |             |
|--------|--------|----------|------------|--------------|---------|---------|----------|---------|-------------|
| -0.878 | 0.0474 | 1.34E-76 | CELA2A     | 1:149026684  | 0.193   | 0.0279  | 4.59E-12 | CCDC40  | 17:78021037 |
| -0.909 | 0.136  | 2.33E-11 | CELA2B     | 1:149735408  | -0.232  | 0.0316  | 2.11E-13 | CCDC40  | 17:78007062 |
| -1.47  | 0.229  | 1.37E-10 | CENPM      | 22:42333330  | 0.304   | 0.0275  | 2.08E-28 | CCDC71L | 7:106538478 |
| -1.5   | 0.139  | 3.78E-27 | CENPP      | 9:94966486   | 0.211   | 0.0108  | 5.32E-85 | CCDC79  | 16:65792665 |
| 0.393  | 0.0579 | 1.14E-11 | CENPV      | 17:16248906  | 0.179   | 0.0218  | 2.19E-16 | CCDC79  | 16:66080024 |
| -1.08  | 0.149  | 4.22E-13 | CEP19      | 3:196433623  | -0.139  | 0.0194  | 7.78E-13 | CCL20   | 2:229374659 |
| -0.508 | 0.0489 | 2.80E-25 | CEP250     | 20:34111861  | -0.112  | 0.016   | 2.56E-12 | CCL20   | 2:228463878 |
| -1.12  | 0.156  | 7.00E-13 | CERS5      | 12:50570127  | -0.163  | 0.0182  | 3.37E-19 | CCL22   | 16:57937788 |
| -0.974 | 0.146  | 2.54E-11 | CES1       | 16:55866900  | 0.586   | 0.0339  | 5.98E-67 | CCL25   | 19:81769    |
| -2.31  | 0.203  | 5.30E-30 | CGB2       | 19:49550077  | 0.059   | 0.0085  | 3.89E-12 | CCL3    | 17:34591375 |
| -0.15  | 0.0219 | 7.42E-12 | CGB8       | 19:49558509  | 0.0501  | 0.00461 | 1.64E-27 | CCL3L3  | 17:34729655 |
| -0.969 | 0.138  | 2.19E-12 | CHAD       | 17:48553916  | 0.457   | 0.0262  | 3.91E-68 | CCL3L3  | 17:34729655 |
| -0.346 | 0.0409 | 2.68E-17 | CHAF1A     | 19:4393294   | -0.173  | 0.0189  | 5.51E-20 | CCL4    | 17:34762804 |
| -0.683 | 0.103  | 3.33E-11 | CHCHD2     | 7:56155219   | -0.129  | 0.0145  | 5.76E-19 | CCL8    | 17:3188133  |
| -0.857 | 0.137  | 3.96E-10 | CHIT1      | 1:203189634  | -0.203  | 0.0239  | 2.00E-17 | CCR4    | 3:33130780  |
| -0.225 | 0.0302 | 9.31E-14 | CHKB-CPT1B | 22:51021599  | 0.141   | 0.0214  | 4.43E-11 | CCZ1    | 7:6884764   |
| 2.22   | 0.356  | 4.49E-10 | CHRM5      | 15:34276895  | 0.264   | 0.0151  | 1.92E-68 | CCZ1    | 7:6877519   |
| -5.6   | 0.772  | 4.05E-13 | CHRNA1     | 2:175615590  | 0.11    | 0.0118  | 1.14E-20 | CD274   | 9:4537048   |
| -6.48  | 0.837  | 9.79E-15 | CHRNA5     | 15:78842239  | -0.185  | 0.0101  | 6.07E-75 | CD34    | 1:207904445 |
| -0.323 | 0.0434 | 9.89E-14 | CHRNE      | 17:4802317   | 0.307   | 0.0153  | 1.48E-89 | CD48    | 1:160667203 |
| 2.14   | 0.19   | 1.99E-29 | CHST12     | 7:152104360  | 1.54    | 0.221   | 3.21E-12 | CD48    | 1:160667203 |
| 0.166  | 0.0228 | 3.32E-13 | CHST13     | 3:126242669  | -0.0767 | 0.01    | 1.72E-14 | CD48    | 1:160666685 |
| -0.486 | 0.0592 | 2.22E-16 | CIB2       | 15:78423596  | 0.245   | 0.0196  | 7.47E-36 | CD48    | 1:160667203 |
| 0.174  | 0.021  | 1.17E-16 | CINP       | 14:102809559 | -0.188  | 0.0149  | 1.69E-36 | CD6     | 11:60776781 |
| -1.48  | 0.0782 | 6.99E-80 | CISD2      | 4:103685471  | -0.125  | 0.0117  | 1.21E-26 | CD6     | 11:60776781 |
| -7.04  | 1.06   | 3.10E-11 | CKS2       | 9:91926088   | -0.67   | 0.0596  | 2.55E-29 | CD6     | 11:60776209 |
| 0.497  | 0.0647 | 1.57E-14 | CLDN9      | 16:3059480   | -0.274  | 0.0277  | 4.52E-23 | CD68    | 17:72248980 |
| 0.56   | 0.0873 | 1.41E-10 | CLEC18A    | 16:70115781  | -0.185  | 0.0223  | 1.08E-16 | CD7     | 17:79317035 |
| -0.306 | 0.0344 | 5.82E-19 | CLEC18C    | 16:70077720  | 0.189   | 0.0169  | 4.92E-29 | CDA     | 1:20934283  |
| -7.68  | 0.951  | 6.71E-16 | CLHC1      | 2:55427398   | 0.136   | 0.0212  | 1.41E-10 | CDC37L1 | 9:45769289  |
| 6.63   | 0.746  | 6.26E-19 | CLPSL1     | 6:35764570   | 0.294   | 0.0298  | 5.86E-23 | CDC37L1 | 9:45769289  |
| 8.94   | 1.19   | 5.80E-14 | CLPSL2     | 6:35744303   | 0.125   | 0.0174  | 6.77E-13 | CDC37L1 | 9:45769289  |
| -1.52  | 0.188  | 6.21E-16 | CLTCL1     | 22:19277809  | 0.474   | 0.0361  | 2.21E-39 | CDC42   | 1:21790318  |
| 2.11   | 0.2    | 5.08E-26 | CNDP2      | 18:72164097  | 0.0999  | 0.0129  | 9.62E-15 | CDC42   | 1:21790318  |
| -0.65  | 0.0805 | 6.77E-16 | CNGA1      | 4:48013316   | 0.122   | 0.0121  | 6.59E-24 | CDC42   | 1:21790318  |
| 2.52   | 0.38   | 3.32E-11 | CNR2       | 1:248601069  | -0.0712 | 0.00917 | 8.20E-15 | CDCP1   | 3:45194509  |
| -1.22  | 0.123  | 3.45E-23 | COA6       | 1:234507977  | 0.141   | 0.0153  | 3.09E-20 | CDH16   | 16:66348814 |
| -1.94  | 0.295  | 4.82E-11 | COCH       | 14:31343494  | 0.184   | 0.0229  | 9.36E-16 | CDH16   | 16:66348814 |
| -3.2   | 0.411  | 6.92E-15 | COL18A1    | 21:46825723  | 0.168   | 0.0235  | 8.75E-13 | CDHR1   | 10:85954220 |

|         |        |          |               |              |         |         |           |         |             |
|---------|--------|----------|---------------|--------------|---------|---------|-----------|---------|-------------|
| -6.43   | 0.978  | 4.88E-11 | COL24A1       | 1:86619342   | 0.256   | 0.0324  | 2.76E-15  | CDHR1   | 10:85954220 |
| -0.388  | 0.0607 | 1.64E-10 | COL28A1       | 7:7572215    | 0.186   | 0.0181  | 9.02E-25  | CDKAL1  | 6:22176923  |
| -2.38   | 0.341  | 2.96E-12 | COL6A1        | 21:47419012  | 0.205   | 0.0218  | 5.27E-21  | CELA2A  | 1:148671016 |
| 0.172   | 0.0255 | 1.53E-11 | COMTD1        | 10:76962774  | -0.285  | 0.0433  | 4.64E-11  | CELA2A  | 1:149026684 |
| 0.346   | 0.0411 | 3.81E-17 | COQ5          | 12:120930798 | 0.0779  | 0.0113  | 5.43E-12  | CELA2A  | 1:149026684 |
| 0.3     | 0.0313 | 9.28E-22 | CORO7         | 16:4460049   | 0.195   | 0.021   | 1.61E-20  | CELA2A  | 1:149026684 |
| -2.13   | 0.281  | 3.45E-14 | CORO7-PAM16   | 16:33941694  | -3.14   | 0.402   | 5.68E-15  | CELA2A  | 1:149026684 |
| 2.39    | 0.295  | 5.42E-16 | CPT1B         | 22:51017082  | 0.207   | 0.0265  | 5.66E-15  | CELA2B  | 1:148671016 |
| -1.1    | 0.175  | 3.26E-10 | CPVL          | 7:29188870   | -0.302  | 0.0331  | 7.25E-20  | CELA2B  | 1:149735408 |
| -0.329  | 0.0209 | 7.84E-56 | CR1           | 1:207684192  | -0.096  | 0.00692 | 9.25E-44  | CELA2B  | 1:149735408 |
| 6.78    | 1.04   | 7.07E-11 | CRABP1        | 15:78633870  | 0.326   | 0.0321  | 3.12E-24  | CELA2B  | 1:149735408 |
| 0.448   | 0.0681 | 4.75E-11 | CRIPT         | 2:46858321   | 0.135   | 0.0129  | 1.25E-25  | CELA2B  | 1:149735408 |
| -0.769  | 0.0977 | 3.52E-15 | CRLF3         | 17:29064135  | -0.208  | 0.0241  | 6.10E-18  | CENPL   | 1:173077158 |
| -1.81   | 0.253  | 8.42E-13 | CRYBG3        | 3:97495510   | -0.133  | 0.0189  | 1.96E-12  | CENPP   | 9:95117419  |
| -2.61   | 0.335  | 6.65E-15 | CRYGA         | 2:209030050  | 0.155   | 0.0155  | 1.52E-23  | CENPP   | 9:94966486  |
| 3.24    | 0.376  | 6.87E-18 | CRYGD         | 2:208985903  | 0.134   | 0.0203  | 4.08E-11  | CEP104  | 1:3577254   |
| 5.52    | 0.755  | 2.65E-13 | CRYZ          | 1:75167477   | -0.532  | 0.0565  | 4.69E-21  | CHAD    | 17:48553916 |
| -2.29   | 0.242  | 3.00E-21 | CSGALNACT1    | 8:19315034   | 0.206   | 0.0186  | 1.65E-28  | CHMP1B  | 18:11882    |
| 2.61    | 0.307  | 1.87E-17 | CSGALNACT2    | 10:43640013  | -0.206  | 0.0176  | 1.21E-31  | CHP1    | 15:40526383 |
| 3.16    | 0.458  | 5.22E-12 | CSRP2         | 12:77437382  | -0.197  | 0.0264  | 8.51E-14  | CHP1    | 15:40531147 |
| 4.07    | 0.653  | 4.58E-10 | CTAGE8        | 7:143952243  | -0.0321 | 0.00493 | 7.46E-11  | CHRNA5  | 15:78843051 |
| -0.0992 | 0.0158 | 3.42E-10 | CTD-2162K18.4 | 19:37263878  | -0.158  | 0.0186  | 1.99E-17  | CHRN1   | 17:80989217 |
| 0.314   | 0.0445 | 1.71E-12 | CTD-2210P24.4 | 11:45830198  | -0.252  | 0.0361  | 2.94E-12  | CHRNE   | 17:4770443  |
| 0.215   | 0.0317 | 1.18E-11 | CTD-2368P22.1 | 19:58513807  | 0.196   | 0.0208  | 4.38E-21  | CHST12  | 7:152104360 |
| -3.67   | 0.56   | 5.62E-11 | CTDNEP1       | 17:7145981   | -0.0909 | 0.0135  | 1.66E-11  | CHST12  | 7:152104360 |
| 0.248   | 0.0248 | 1.52E-23 | CTIF          | 18:46384073  | -0.229  | 0.029   | 2.87E-15  | CHST12  | 7:152104360 |
| -0.371  | 0.032  | 4.43E-31 | CTNS          | 17:3564687   | -0.241  | 0.02    | 1.94E-33  | CHST12  | 7:152104360 |
| -0.459  | 0.0618 | 1.11E-13 | CTRB1         | 16:75268120  | -0.0617 | 0.00669 | 2.90E-20  | CHST12  | 7:152104360 |
| 0.139   | 0.0206 | 1.50E-11 | CTSH          | 15:79263141  | 0.376   | 0.0557  | 1.47E-11  | CIAO1   | 2:96308288  |
| 0.446   | 0.0579 | 1.33E-14 | CWH43         | 4:49225999   | -0.247  | 0.019   | 1.22E-38  | CIAO1   | 2:97202490  |
| -0.443  | 0.0597 | 1.17E-13 | CYB561        | 17:61518005  | -0.436  | 0.0194  | 7.42E-112 | CLEC5A  | 7:142143328 |
| 0.156   | 0.0217 | 6.53E-13 | CYP21A2       | 6:31914935   | 0.247   | 0.0348  | 1.27E-12  | CNEP1R1 | 16:50241875 |
| -3.23   | 0.498  | 8.82E-11 | CYP24A1       | 20:52789743  | -0.0813 | 0.00887 | 4.92E-20  | CNEP1R1 | 16:49558966 |
| -1.68   | 0.18   | 1.03E-20 | CYP2D6        | 22:42485671  | 0.479   | 0.0233  | 6.53E-94  | CNOT2   | 12:69986    |
| -0.411  | 0.0445 | 2.56E-20 | CYP4B1        | 1:47308949   | -0.152  | 0.0231  | 4.70E-11  | CNOT2   | 12:69986    |
| -3.56   | 0.545  | 6.48E-11 | CYSTM1        | 5:139543379  | -0.155  | 0.0237  | 6.15E-11  | CNR2    | 1:248601069 |
| -0.298  | 0.0441 | 1.41E-11 | DBH           | 9:136500515  | 0.217   | 0.0157  | 1.89E-43  | CNR2    | 1:235844    |
| -2.56   | 0.294  | 3.11E-18 | DCAKD         | 17:43128906  | 0.127   | 0.019   | 2.32E-11  | CNR2    | 1:248601069 |
| 2.22    | 0.269  | 1.55E-16 | DCBLD2        | 3:98515161   | -0.098  | 0.0124  | 2.72E-15  | CNTF    | 11:58450609 |

|        |        |           |         |              |         |         |           |               |              |
|--------|--------|-----------|---------|--------------|---------|---------|-----------|---------------|--------------|
| 2.52   | 0.391  | 1.16E-10  | DDRGK1  | 20:26102364  | -1.76   | 0.213   | 1.42E-16  | COL6A5        | 3:129235558  |
| -3.82  | 0.482  | 2.28E-15  | DDT     | 22:24266726  | 0.165   | 0.0146  | 1.29E-29  | COL6A5        | 3:129235558  |
| -2.11  | 0.147  | 1.01E-46  | DDTL    | 22:24266954  | -0.36   | 0.0111  | 9.58E-231 | COPB1         | 11:134855811 |
| 0.179  | 0.0265 | 1.43E-11  | DDX11   | 12:31225474  | -0.594  | 0.0172  | 2.40E-261 | COPZ1         | 12:54462997  |
| 0.774  | 0.0936 | 1.35E-16  | DDX24   | 14:94518415  | -0.166  | 0.025   | 3.14E-11  | COPZ1         | 12:54507057  |
| 8.57   | 1.12   | 1.98E-14  | DDX51   | 12:132610313 | -0.191  | 0.0256  | 8.59E-14  | COQ10B        | 2:19858623   |
| -2.55  | 0.333  | 1.89E-14  | DEFA5   | 8:7544824    | 0.22    | 0.0307  | 7.72E-13  | CORO7-PAM16   | 16:33991563  |
| 3.57   | 0.556  | 1.36E-10  | DEFB119 | 20:29617870  | -0.152  | 0.00711 | 2.13E-101 | CORO7-PAM16   | 16:33941694  |
| 0.348  | 0.0353 | 6.31E-23  | DEFB121 | 20:29422202  | -0.143  | 0.0112  | 2.48E-37  | CORO7-PAM16   | 16:33941694  |
| 0.3    | 0.0363 | 1.40E-16  | DEFB135 | 8:12406084   | 0.0909  | 0.0127  | 8.22E-13  | CORO7-PAM16   | 16:33941694  |
| 0.763  | 0.0696 | 5.78E-28  | DFFB    | 1:3791533    | 0.204   | 0.022   | 1.81E-20  | CORO7-PAM16   | 16:33941694  |
| 1.38   | 0.197  | 2.47E-12  | DFNA5   | 7:24749429   | 0.176   | 0.0143  | 8.23E-35  | COX6B1        | 19:36635239  |
| 0.248  | 0.0374 | 3.33E-11  | DHFR    | 5:79951133   | 0.419   | 0.0208  | 3.02E-90  | COX6B1        | 19:36159808  |
| 0.579  | 0.076  | 2.57E-14  | DHODH   | 16:72042682  | -0.114  | 0.0151  | 4.36E-14  | COX8A         | 11:64729109  |
| -0.18  | 0.0253 | 1.12E-12  | DHRS1   | 14:24790465  | -0.168  | 0.022   | 2.23E-14  | CR1L          | 1:207907085  |
| 0.391  | 0.0368 | 2.28E-26  | DHRS11  | 17:34913982  | -0.217  | 0.0299  | 3.94E-13  | CRBN          | 3:24291336   |
| -0.845 | 0.125  | 1.38E-11  | DHRS4L2 | 14:24433294  | -0.424  | 0.0408  | 2.69E-25  | CRCP          | 7:6526147    |
| 4.14   | 0.666  | 5.09E-10  | DHX33   | 17:5351791   | -0.101  | 0.0111  | 9.11E-20  | CRCP          | 7:6526147    |
| -0.204 | 0.0323 | 2.69E-10  | DIRC3   | 2:218150948  | -0.0622 | 0.00826 | 5.06E-14  | CRLF3         | 17:28843496  |
| -0.967 | 0.143  | 1.36E-11  | DNAH3   | 16:21203042  | 0.032   | 0.00348 | 3.74E-20  | CSHL1         | 17:61018091  |
| -0.172 | 0.0227 | 3.53E-14  | DNAJC15 | 13:43598707  | -0.273  | 0.0168  | 2.23E-59  | CSHL1         | 17:61018091  |
| -1.6   | 0.254  | 2.99E-10  | DND1    | 5:140030306  | -0.115  | 0.0157  | 2.39E-13  | CSHL1         | 17:61018091  |
| 1.65   | 0.266  | 5.54E-10  | DNLZ    | 9:139239807  | 0.381   | 0.053   | 6.54E-13  | CSNK1D        | 17:80989217  |
| -0.585 | 0.0849 | 5.56E-12  | DPM2    | 9:130724828  | -0.21   | 0.0227  | 2.22E-20  | CTC-512J12.6  | 19:44211098  |
| 0.339  | 0.049  | 4.57E-12  | DPY19L2 | 12:64072856  | 0.121   | 0.0182  | 2.96E-11  | CTD-2132N18.3 | 17:39606109  |
| -0.527 | 0.0583 | 1.57E-19  | DPYSL5  | 2:27097194   | -0.28   | 0.0188  | 3.63E-50  | CTD-2600O9.1  | 16:58696420  |
| -1.38  | 0.184  | 6.38E-14  | DRAXIN  | 1:121113600  | -1.6    | 0.222   | 5.71E-13  | CTD-2600O9.1  | 16:58515425  |
| -1.74  | 0.232  | 6.38E-14  | DRD2    | 11:113566207 | -0.0914 | 0.0136  | 1.81E-11  | CTSG          | 14:25405621  |
| 11.8   | 1.76   | 2.02E-11  | DSC1    | 18:28749716  | 0.0884  | 0.0062  | 3.99E-46  | CTSG          | 14:25405621  |
| -0.327 | 0.041  | 1.52E-15  | DSCC1   | 8:120868138  | -0.295  | 0.0141  | 3.38E-97  | CTSG          | 14:24231601  |
| -0.585 | 0.0936 | 4.10E-10  | DST     | 6:57447737   | 2.48    | 0.234   | 3.03E-26  | CWC15         | 11:94860472  |
| -2.04  | 0.233  | 2.03E-18  | DUSP14  | 17:35744215  | 0.171   | 0.0191  | 3.46E-19  | CWC15         | 11:94860472  |
| 0.377  | 0.0421 | 3.40E-19  | DUX4L2  | 4:190897129  | -0.194  | 0.0214  | 1.24E-19  | CWH43         | 4:49245680   |
| 0.424  | 0.0389 | 1.16E-27  | DYDC2   | 10:82195219  | -0.168  | 0.0254  | 3.74E-11  | CWH43         | 4:49245680   |
| 1.11   | 0.174  | 1.78E-10  | ECE2    | 3:183999801  | -0.172  | 0.0206  | 6.85E-17  | CWH43         | 4:49245680   |
| -0.28  | 0.0411 | 9.58E-12  | ECHDC3  | 10:11784320  | 0.252   | 0.0181  | 4.61E-44  | CWH43         | 4:49245680   |
| -5.51  | 0.25   | 1.19E-107 | EFCAB13 | 17:45385012  | 0.118   | 0.0108  | 8.67E-28  | CWH43         | 4:49245680   |
| -6.11  | 0.709  | 6.83E-18  | EFCAB2  | 1:245133662  | -0.251  | 0.0184  | 2.27E-42  | CXCL10        | 4:76024963   |
| -2.7   | 0.415  | 7.72E-11  | EFEMP1  | 2:56193418   | -0.302  | 0.0466  | 9.13E-11  | CXCL10        | 4:77471246   |

|        |        |           |         |             |         |         |           |          |              |
|--------|--------|-----------|---------|-------------|---------|---------|-----------|----------|--------------|
| -4.07  | 0.377  | 3.60E-27  | EFHB    | 3:19987539  | 0.441   | 0.0199  | 8.21E-109 | CXCL3    | 4:75316056   |
| -7.12  | 0.335  | 3.04E-100 | EIF2A   | 3:150292771 | 0.283   | 0.0252  | 2.90E-29  | CXCL5    | 4:7540518    |
| -11.6  | 1.03   | 2.02E-29  | EIF3C   | 16:28414341 | 0.263   | 0.0282  | 1.10E-20  | CXCL5    | 4:74601312   |
| -7.66  | 0.994  | 1.30E-14  | EIF3M   | 11:32753984 | 0.0882  | 0.0124  | 1.14E-12  | CXCL6    | 4:74601312   |
| -0.618 | 0.0906 | 9.03E-12  | EME1    | 17:48462239 | -0.165  | 0.016   | 6.19E-25  | CXCL6    | 4:74601312   |
| 0.262  | 0.0391 | 2.07E-11  | ENDOG   | 9:131575642 | 0.229   | 0.0252  | 1.02E-19  | CXCL9    | 4:7614727    |
| -0.325 | 0.0307 | 3.45E-26  | EPCAM   | 2:47596853  | 0.923   | 0.0317  | 2.21E-186 | CXCL9    | 4:77822371   |
| -0.896 | 0.129  | 3.76E-12  | EPG5    | 18:43468947 | -0.0646 | 0.00862 | 6.67E-14  | CXCR5    | 11:119083378 |
| -1.05  | 0.0914 | 1.52E-30  | EPHB6   | 7:142562736 | -0.412  | 0.0526  | 4.78E-15  | CYB561   | 17:61518005  |
| -1.52  | 0.193  | 3.39E-15  | EPPK1   | 8:144953999 | -0.0243 | 0.00318 | 2.15E-14  | CYB561   | 17:61518005  |
| 1.64   | 0.195  | 4.09E-17  | ERAP2   | 5:96252432  | 0.548   | 0.0163  | 8.67E-248 | CYP2D6   | 22:42539720  |
| 4.53   | 0.678  | 2.37E-11  | ERCC3   | 2:128015367 | 0.101   | 0.0113  | 3.96E-19  | CYP2D6   | 22:42540551  |
| -1.14  | 0.13   | 1.80E-18  | ERMAP   | 1:43303365  | -0.187  | 0.0188  | 2.60E-23  | DCDC2    | 6:23623830   |
| -0.567 | 0.0439 | 3.67E-38  | ERV3-1  | 7:64427532  | 0.18    | 0.0172  | 1.25E-25  | DDR GK1  | 20:26102364  |
| -0.817 | 0.128  | 1.74E-10  | ESPNL   | 2:239008067 | 0.135   | 0.0121  | 6.62E-29  | DDR GK1  | 20:26102364  |
| 4.31   | 0.683  | 2.78E-10  | ESRRB   | 14:76624026 | 0.0369  | 0.00552 | 2.31E-11  | DDR GK1  | 20:26102364  |
| -4.56  | 0.642  | 1.22E-12  | ETFDH   | 4:159601676 | 0.187   | 0.0225  | 9.48E-17  | DDR GK1  | 20:26102364  |
| 5.8    | 0.799  | 3.90E-13  | ETS2    | 21:40211235 | -0.141  | 0.0205  | 6.07E-12  | DDR GK1  | 20:26102364  |
| 4.85   | 0.724  | 2.10E-11  | ETV7    | 6:36354213  | 0.14    | 0.0148  | 3.10E-21  | DDT      | 22:25056085  |
| -0.287 | 0.0407 | 1.77E-12  | EVPL    | 17:73985074 | 0.107   | 0.0162  | 3.98E-11  | DDTL     | 22:24295217  |
| -1.14  | 0.17   | 2.00E-11  | EXOSC10 | 1:121113600 | -4.38   | 0.282   | 2.11E-54  | DDTL     | 22:24267047  |
| 1.97   | 0.308  | 1.59E-10  | EXOSC6  | 16:70297568 | -0.23   | 0.0229  | 9.80E-24  | DDTL     | 22:24266954  |
| -1.94  | 0.302  | 1.33E-10  | EYA3    | 1:28306250  | 0.0804  | 0.0103  | 5.91E-15  | DDX11    | 12:31213631  |
| 1.45   | 0.226  | 1.40E-10  | F11     | 4:187153511 | 0.15    | 0.0152  | 5.71E-23  | DDX11    | 12:31225474  |
| -3.3   | 0.384  | 8.42E-18  | F2RL1   | 5:76108739  | -0.0566 | 0.0071  | 1.56E-15  | DDX11    | 12:31230300  |
| 7.15   | 0.701  | 1.99E-24  | F5      | 1:169533346 | 0.117   | 0.0177  | 3.84E-11  | DDX19A   | 16:70563271  |
| 7.54   | 1.09   | 4.60E-12  | FABP1   | 2:88436001  | -0.358  | 0.0234  | 7.75E-53  | DEFA1    | 8:7756576    |
| -1.82  | 0.271  | 1.87E-11  | FADD    | 11:70051966 | -0.117  | 0.014   | 6.43E-17  | DEFA1B   | 8:74106526   |
| -0.397 | 0.0526 | 4.44E-14  | FAH     | 15:80478587 | -0.386  | 0.0362  | 1.52E-26  | DEFA3    | 8:7756576    |
| 2.56   | 0.347  | 1.61E-13  | FAIM    | 3:138328016 | 0.159   | 0.0172  | 2.37E-20  | DEFA4    | 8:7756576    |
| -3.17  | 0.42   | 4.43E-14  | FAM118A | 22:45728978 | -1.46   | 0.0541  | 2.10E-160 | DEFA4    | 8:7756550    |
| -1.68  | 0.243  | 4.73E-12  | FAM131C | 1:16391056  | 0.145   | 0.0211  | 6.33E-12  | DEFA4    | 8:7756576    |
| 1.44   | 0.205  | 2.15E-12  | FAM13A  | 4:89624853  | -0.129  | 0.0199  | 9.03E-11  | DEFA6    | 8:7132385    |
| -1.53  | 0.213  | 6.81E-13  | FAM149A | 4:187098581 | 0.189   | 0.0188  | 8.89E-24  | DEFA6    | 8:7457281    |
| 0.149  | 0.0204 | 2.79E-13  | FAM153A | 5:177181107 | 0.522   | 0.0318  | 1.49E-60  | DEFB103A | 8:6942954    |
| -0.364 | 0.0285 | 2.35E-37  | FAM153C | 5:177431923 | 0.212   | 0.0308  | 5.86E-12  | DEFB103A | 8:86768114   |
| -0.63  | 0.0833 | 3.94E-14  | FAM154B | 15:82595566 | 0.322   | 0.0313  | 8.02E-25  | DEFB103B | 8:64062283   |
| 0.355  | 0.0412 | 6.90E-18  | FAM163A | 1:179732402 | 0.211   | 0.0285  | 1.33E-13  | DEFB103B | 8:75220404   |
| -0.26  | 0.0379 | 6.88E-12  | FAM170A | 5:118795690 | 0.0524  | 0.00577 | 1.07E-19  | DEFB104A | 8:74323571   |

|        |        |          |          |              |         |         |           |          |              |
|--------|--------|----------|----------|--------------|---------|---------|-----------|----------|--------------|
| -0.386 | 0.0517 | 8.26E-14 | FAM178B  | 2:97572798   | -0.276  | 0.0355  | 7.57E-15  | DEFB104B | 8:74323571   |
| -0.901 | 0.135  | 2.49E-11 | FAM184B  | 4:17645710   | -0.092  | 0.0106  | 3.98E-18  | DEFB119  | 20:29617870  |
| -3.8   | 0.536  | 1.35E-12 | FAM187A  | 17:42937171  | 0.26    | 0.0202  | 6.53E-38  | DEFB119  | 20:29617870  |
| -0.183 | 0.0271 | 1.45E-11 | FAM193A  | 4:3597137    | 1.12    | 0.152   | 1.73E-13  | DEFB119  | 20:29617870  |
| -1.37  | 0.217  | 2.73E-10 | FAM19A4  | 3:68796156   | -0.0756 | 0.0111  | 9.71E-12  | DEFB119  | 20:29617870  |
| 2.24   | 0.348  | 1.22E-10 | FAM211A  | 17:16390287  | -0.189  | 0.0281  | 1.74E-11  | DEFB119  | 20:29617870  |
| -0.366 | 0.0275 | 2.05E-40 | FAM21B   | 10:47917064  | -2.18   | 0.0501  | <1.0E-314 | DEFB121  | 20:29611261  |
| -0.593 | 0.0937 | 2.47E-10 | FAM21D   | 10:51190471  | -0.375  | 0.0395  | 2.23E-21  | DEFB121  | 20:29422202  |
| -0.919 | 0.118  | 6.80E-15 | FAM221A  | 7:23719322   | 0.22    | 0.0134  | 1.42E-60  | DEFB121  | 20:29422202  |
| 0.807  | 0.124  | 7.61E-11 | FAM26F   | 6:116770217  | 0.185   | 0.0269  | 6.10E-12  | DEFB121  | 20:29422202  |
| 0.638  | 0.0411 | 2.42E-54 | FAM27B   | 9:67785194   | -0.52   | 0.0592  | 1.58E-18  | DEFB121  | 20:29422202  |
| 0.877  | 0.119  | 1.71E-13 | FAM27C   | 9:44990610   | -0.268  | 0.0409  | 5.66E-11  | DEFB127  | 20:10372984  |
| 0.772  | 0.124  | 4.79E-10 | FAM27E2  | 9:45730241   | -0.567  | 0.0437  | 1.70E-38  | DEFB130  | 8:127658728  |
| -0.326 | 0.0414 | 3.42E-15 | FAM27E3  | 9:68400922   | -4.95   | 0.371   | 1.31E-40  | DEFB130  | 8:127658728  |
| 0.288  | 0.0334 | 6.54E-18 | FAM3B    | 21:42697714  | 0.0683  | 0.00842 | 4.99E-16  | DEFB135  | 8:11873610   |
| 0.629  | 0.0986 | 1.78E-10 | FAM49A   | 2:16718894   | -0.129  | 0.0198  | 7.26E-11  | DEFB135  | 8:11873610   |
| -0.255 | 0.0374 | 9.22E-12 | FAM83H   | 8:144822591  | -0.133  | 0.0173  | 1.50E-14  | DEFB135  | 8:11873610   |
| 0.325  | 0.0433 | 6.11E-14 | FAM86B2  | 8:11950424   | 0.0622  | 0.00746 | 7.57E-17  | DEFB135  | 8:11873610   |
| -0.193 | 0.0234 | 1.61E-16 | FAM89A   | 1:231170389  | 0.355   | 0.0331  | 7.76E-27  | DEGS1    | 1:223491775  |
| -1.17  | 0.186  | 3.17E-10 | FANK1    | 10:127680215 | 0.146   | 0.0224  | 7.13E-11  | DEGS1    | 1:223491775  |
| 3.33   | 0.432  | 1.27E-14 | FAS      | 10:90752018  | 0.287   | 0.0256  | 3.60E-29  | DENND6A  | 3:58624750   |
| 1.85   | 0.26   | 1.12E-12 | FBN2     | 5:127873114  | 0.032   | 0.00419 | 2.22E-14  | DESI1    | 22:42445693  |
| 0.562  | 0.0886 | 2.25E-10 | FBXL18   | 7:61821630   | -2.64   | 0.312   | 2.64E-17  | DESI1    | 22:42445693  |
| -0.155 | 0.0229 | 1.30E-11 | FBXO6    | 1:121113600  | -1.75   | 0.228   | 1.65E-14  | DFNA5    | 7:24757660   |
| -0.252 | 0.0234 | 4.81E-27 | FBXW10   | 17:18669817  | -0.0327 | 0.00385 | 2.00E-17  | DHFR     | 5:79951133   |
| 1.05   | 0.0614 | 1.46E-65 | FCER1A   | 1:159222847  | 0.125   | 0.0108  | 5.58E-31  | DHTKD1   | 10:127583983 |
| 1.42   | 0.198  | 7.41E-13 | FCRLB    | 1:161696900  | -0.172  | 0.0195  | 1.14E-18  | DLEU7    | 13:51847622  |
| -0.268 | 0.0336 | 1.51E-15 | FDCSP    | 4:70249195   | -0.136  | 0.0209  | 7.66E-11  | DNAJA2   | 16:46402985  |
| -0.383 | 0.036  | 1.96E-26 | FEM1A    | 19:4795647   | -0.173  | 0.0105  | 5.44E-61  | DNAJA3   | 16:46402985  |
| -1.16  | 0.155  | 7.22E-14 | FEZ2     | 2:36781138   | -0.233  | 0.0119  | 2.30E-85  | DNAJC15  | 13:43608939  |
| 0.271  | 0.031  | 2.29E-18 | FFAR1    | 19:35837428  | -0.0903 | 0.0135  | 2.25E-11  | DNAJC16  | 1:149582977  |
| 0.194  | 0.02   | 3.01E-22 | FGF6     | 12:37876563  | -0.0994 | 0.0118  | 3.65E-17  | DNAJC16  | 1:148851853  |
| 0.561  | 0.0846 | 3.33E-11 | FGFR4    | 5:176509971  | -0.161  | 0.0229  | 2.06E-12  | DNAJC16  | 1:149582977  |
| -3.16  | 0.382  | 1.31E-16 | FGGY     | 1:60228310   | -0.374  | 0.0267  | 1.40E-44  | DPPA5    | 6:74062263   |
| -0.883 | 0.135  | 6.12E-11 | FHIT     | 3:59735965   | -0.129  | 0.0186  | 4.05E-12  | DRAXIN   | 1:120154679  |
| -0.257 | 0.031  | 1.13E-16 | FIGNL1   | 7:50485073   | 0.16    | 0.0114  | 9.51E-45  | DRAXIN   | 1:121113265  |
| -0.492 | 0.0486 | 4.35E-24 | FKBP11   | 12:49365838  | 0.205   | 0.0227  | 1.70E-19  | DRAXIN   | 1:121113600  |
| -0.946 | 0.146  | 9.21E-11 | FKBP2    | 11:64088562  | -0.271  | 0.0288  | 4.97E-21  | DRAXIN   | 1:121113600  |
| -0.253 | 0.0325 | 6.99E-15 | FLJ00104 | 16:87764267  | 0.0914  | 0.0107  | 1.32E-17  | DRAXIN   | 1:121113600  |

|        |        |          |          |              |         |         |          |         |              |
|--------|--------|----------|----------|--------------|---------|---------|----------|---------|--------------|
| -1.1   | 0.145  | 3.29E-14 | FLT3     | 13:28598262  | 0.313   | 0.0197  | 7.63E-57 | DSCC1   | 8:120868138  |
| 8.77   | 1.28   | 7.30E-12 | FLYWCH1  | 16:2987074   | 0.245   | 0.0156  | 1.39E-55 | DSCC1   | 8:120868138  |
| 0.284  | 0.0336 | 2.85E-17 | FMO2     | 1:171167157  | -0.0976 | 0.0117  | 7.31E-17 | DSG3    | 18:29794353  |
| 0.227  | 0.0241 | 4.55E-21 | FOPNL    | 16:15963922  | -0.0936 | 0.013   | 6.02E-13 | DSG3    | 18:29899067  |
| -5.61  | 0.897  | 4.00E-10 | FOXD4    | 9:110586     | -0.138  | 0.0161  | 1.02E-17 | DST     | 6:57447737   |
| -0.214 | 0.0297 | 5.79E-13 | FOXD4L1  | 2:114203158  | -0.118  | 0.0112  | 5.91E-26 | DST     | 6:57447737   |
| 1.67   | 0.239  | 2.80E-12 | FOXD4L2  | 9:41947473   | 0.0804  | 0.0109  | 1.63E-13 | DST     | 6:57447737   |
| 4.66   | 0.658  | 1.42E-12 | FOXD4L4  | 9:70499939   | -0.0538 | 0.00758 | 1.27E-12 | DST     | 6:57447737   |
| 0.13   | 0.0207 | 3.38E-10 | FOXD4L6  | 9:68412651   | 0.317   | 0.0384  | 1.52E-16 | DST     | 6:57447737   |
| 0.227  | 0.0265 | 1.07E-17 | FOXRED1  | 11:126093217 | -0.144  | 0.0186  | 9.79E-15 | DUX4L2  | 4:190897129  |
| 0.868  | 0.106  | 2.64E-16 | FOXRED2  | 22:36795584  | 0.273   | 0.0345  | 2.51E-15 | DUX4L2  | 4:190897129  |
| 2.43   | 0.372  | 6.48E-11 | FP15737  | 8:23435117   | 0.426   | 0.036   | 2.63E-32 | DUX4L2  | 4:190611445  |
| 4.29   | 0.633  | 1.22E-11 | FRA10AC1 | 10:95460373  | 0.481   | 0.0279  | 1.33E-66 | DUX4L2  | 4:190897129  |
| -0.118 | 0.0161 | 2.32E-13 | FREM2    | 13:39331723  | -0.11   | 0.00622 | 5.48E-70 | DUX4L2  | 4:190611445  |
| 0.166  | 0.0267 | 5.06E-10 | FTCD     | 21:47593484  | 0.496   | 0.0463  | 8.87E-27 | DYTN    | 2:20692947   |
| -1.91  | 0.284  | 1.75E-11 | FTCDNL1  | 2:200620763  | -0.271  | 0.0158  | 6.08E-66 | ECHDC3  | 10:11784320  |
| -1.52  | 0.208  | 2.72E-13 | FUT2     | 19:49199804  | -0.329  | 0.0326  | 5.99E-24 | ECHS1   | 10:135446672 |
| 0.258  | 0.0227 | 6.20E-30 | FXN      | 9:71698978   | -0.177  | 0.0149  | 1.52E-32 | EFCAB2  | 1:245159567  |
| -0.802 | 0.0576 | 4.55E-44 | FZD3     | 8:28396329   | -0.124  | 0.0146  | 2.01E-17 | EFHB    | 3:19987539   |
| -0.253 | 0.024  | 5.55E-26 | GAA      | 17:78075228  | -0.137  | 0.0202  | 1.18E-11 | ENTHD1  | 22:40403443  |
| -0.586 | 0.0702 | 6.97E-17 | GAB4     | 22:17384102  | -0.134  | 0.0146  | 4.39E-20 | ENTHD1  | 22:40403443  |
| -0.732 | 0.1    | 2.48E-13 | GAL      | 11:68451973  | -0.282  | 0.0314  | 2.69E-19 | EPCAM   | 2:47596853   |
| -2.6   | 0.36   | 5.11E-13 | GAL3ST2  | 2:242703183  | 0.0625  | 0.00851 | 2.07E-13 | EPCAM   | 2:47611644   |
| -4.16  | 0.592  | 2.11E-12 | GALC     | 14:88496080  | -0.132  | 0.0192  | 6.20E-12 | EPCAM   | 2:47596853   |
| 0.189  | 0.0272 | 3.69E-12 | GALM     | 2:38887407   | 0.399   | 0.032   | 1.11E-35 | ERAP2   | 5:96252432   |
| -0.654 | 0.0979 | 2.38E-11 | GALNT3   | 2:166734933  | 0.084   | 0.0116  | 4.44E-13 | ERAP2   | 5:96274720   |
| 0.454  | 0.0724 | 3.59E-10 | GALNT8   | 12:4958152   | -0.348  | 0.0282  | 5.49E-35 | ERLEC1  | 2:54642871   |
| 0.217  | 0.0333 | 7.20E-11 | GAR1     | 4:110760941  | 0.137   | 0.016   | 1.10E-17 | ERLEC1  | 2:54642871   |
| -0.167 | 0.0217 | 1.41E-14 | GAS8     | 16:90093075  | 0.367   | 0.0348  | 5.30E-26 | ESCO2   | 8:27601280   |
| -0.185 | 0.026  | 1.12E-12 | GATAD2B  | 1:153773240  | -0.082  | 0.00825 | 2.81E-23 | ESCO2   | 8:27601280   |
| 0.212  | 0.0326 | 7.87E-11 | GATC     | 12:121015907 | 0.264   | 0.029   | 8.75E-20 | ESPL1   | 12:54564783  |
| -0.285 | 0.0453 | 3.15E-10 | GBP3     | 1:89455980   | -0.361  | 0.0329  | 5.17E-28 | ESPNL   | 2:239008067  |
| -0.293 | 0.0327 | 3.24E-19 | GCK      | 7:44183187   | -0.179  | 0.0255  | 2.22E-12 | EVC     | 4:49209318   |
| -0.179 | 0.0227 | 3.13E-15 | GCLM     | 1:94351328   | -0.0933 | 0.0128  | 3.12E-13 | EVC     | 4:49209318   |
| -0.435 | 0.0688 | 2.57E-10 | GDF5     | 20:34022387  | 0.0431  | 0.00636 | 1.23E-11 | EXOC1   | 4:56126095   |
| -0.489 | 0.0787 | 5.18E-10 | GDF9     | 5:132201793  | 0.0736  | 0.0106  | 3.83E-12 | EXOSC10 | 1:121113600  |
| -0.2   | 0.0261 | 1.82E-14 | GEMIN7   | 19:45594170  | -0.161  | 0.018   | 3.74E-19 | EXOSC10 | 1:121113600  |
| -0.132 | 0.0134 | 6.80E-23 | GEN1     | 2:17923343   | 0.102   | 0.0151  | 1.43E-11 | EXOSC10 | 1:121113600  |
| -0.252 | 0.0406 | 5.40E-10 | GFRA4    | 20:3609652   | 0.0731  | 0.009   | 4.58E-16 | EXOSC10 | 1:121113600  |

|        |        |          |           |              |         |         |           |         |             |
|--------|--------|----------|-----------|--------------|---------|---------|-----------|---------|-------------|
| -25.8  | 1.65   | 4.12E-55 | GGNBP2    | 17:34905455  | 0.0929  | 0.0129  | 5.95E-13  | EXOSC10 | 1:121113600 |
| -6.05  | 0.845  | 8.08E-13 | GGTLC3    | 22:20378593  | -0.171  | 0.0223  | 1.74E-14  | EXOSC6  | 16:70563271 |
| 2.83   | 0.329  | 7.85E-18 | GIMAP5    | 7:150437927  | 0.223   | 0.0347  | 1.31E-10  | FABP1   | 2:88449963  |
| 6.21   | 0.864  | 6.60E-13 | GINS1     | 20:25904151  | -2.32   | 0.152   | 1.35E-52  | FABP1   | 2:88438050  |
| -11.1  | 0.797  | 4.33E-44 | GLIPR1L2  | 12:75811234  | -0.479  | 0.0164  | 1.57E-187 | FAM118A | 22:45728978 |
| -26.7  | 2.06   | 2.03E-38 | GLT8D2    | 12:104549512 | 0.221   | 0.0291  | 3.09E-14  | FAM118A | 22:45756081 |
| 16.7   | 1.06   | 6.37E-56 | GMPPB     | 3:49813935   | 0.179   | 0.0229  | 5.43E-15  | FAM134C | 17:41382047 |
| 2.17   | 0.347  | 4.01E-10 | GNA15     | 19:3149990   | -0.318  | 0.0219  | 8.98E-48  | FAM185A | 7:102217297 |
| -2.45  | 0.386  | 2.19E-10 | GNAQ      | 9:80349435   | 0.0781  | 0.0109  | 7.77E-13  | FAM185A | 7:102217297 |
| -4.35  | 0.692  | 3.25E-10 | GNB3      | 12:6949026   | -0.313  | 0.0261  | 3.90E-33  | FAM186A | 12:51788748 |
| -4.78  | 0.478  | 1.52E-23 | GNL3      | 3:52626443   | -0.095  | 0.0106  | 3.18E-19  | FAM186A | 12:50290056 |
| 4.3    | 0.453  | 2.26E-21 | GNLY      | 2:85922860   | -0.463  | 0.037   | 6.30E-36  | FAM193A | 4:3597137   |
| 7.22   | 0.805  | 2.99E-19 | GNMT      | 6:42928758   | -0.505  | 0.0173  | 2.54E-187 | FAM193A | 4:3597137   |
| -0.184 | 0.0195 | 3.88E-21 | GOLGA4    | 3:37440726   | 0.123   | 0.0169  | 3.39E-13  | FAM193A | 4:3597137   |
| -0.216 | 0.0263 | 2.16E-16 | GOLGA6L10 | 15:82736362  | 0.164   | 0.0194  | 2.82E-17  | FAM193A | 4:3597137   |
| 0.228  | 0.0301 | 3.60E-14 | GOLGA6L19 | 15:83003791  | 0.221   | 0.0248  | 5.04E-19  | FAM193A | 4:3597137   |
| 0.144  | 0.0223 | 1.07E-10 | GOLGA6L20 | 15:82581264  | 0.224   | 0.0185  | 9.57E-34  | FAM20B  | 1:179982938 |
| 1.17   | 0.168  | 3.30E-12 | GOLGA6L6  | 15:20058655  | -0.109  | 0.0168  | 8.69E-11  | FAM20B  | 1:179861829 |
| 0.283  | 0.0428 | 3.79E-11 | GOLGA6L9  | 15:83410535  | 0.428   | 0.0256  | 9.57E-63  | FAM21B  | 10:47917284 |
| -1.71  | 0.156  | 5.85E-28 | GOLGA8H   | 15:30782439  | 0.0775  | 0.00652 | 1.39E-32  | FAM21B  | 10:47917284 |
| -0.144 | 0.0213 | 1.37E-11 | GOLGA8O   | 15:32899868  | 0.218   | 0.0214  | 2.27E-24  | FAM21B  | 10:47917284 |
| -2.36  | 0.32   | 1.64E-13 | GOSR1     | 17:28771703  | -0.0844 | 0.0101  | 6.46E-17  | FAM221A | 7:23719322  |
| 1.62   | 0.226  | 7.60E-13 | GP6       | 19:55500273  | -0.168  | 0.0187  | 2.61E-19  | FAM230A | 22:21584355 |
| -1.04  | 0.11   | 3.24E-21 | GPA33     | 1:167035924  | -0.0423 | 0.00572 | 1.41E-13  | FAM230A | 22:21584355 |
| -0.773 | 0.0366 | 5.19E-99 | GPAT2     | 2:96748054   | -0.39   | 0.0574  | 1.09E-11  | FAM27C  | 9:45367737  |
| -1.27  | 0.112  | 8.38E-30 | GPIHBP1   | 8:144295782  | 0.255   | 0.0398  | 1.48E-10  | FAM27C  | 9:45367737  |
| -0.821 | 0.108  | 2.92E-14 | GPNMB     | 7:23276785   | -0.55   | 0.0383  | 9.18E-47  | FAM27C  | 9:45367737  |
| -1.24  | 0.157  | 2.83E-15 | GPR115    | 6:47632111   | 0.019   | 0.0028  | 1.16E-11  | FAM27C  | 9:45766038  |
| 2.09   | 0.316  | 3.74E-11 | GPR161    | 1:168090767  | -0.11   | 0.0121  | 9.82E-20  | FAM27C  | 9:45786830  |
| -2.25  | 0.268  | 4.64E-17 | GPR35     | 2:241561088  | -0.217  | 0.0216  | 9.54E-24  | FAM27D1 | 9:46457567  |
| 0.387  | 0.0558 | 4.05E-12 | GPR39     | 2:133089144  | 0.13    | 0.0131  | 3.28E-23  | FAM27D1 | 9:46279477  |
| 0.856  | 0.109  | 4.06E-15 | GPR55     | 2:231795391  | -0.286  | 0.0185  | 6.51E-54  | FAM27E1 | 9:47175594  |
| 0.198  | 0.031  | 1.69E-10 | GPX1      | 3:49317727   | -0.171  | 0.018   | 2.10E-21  | FAM27E1 | 9:47058326  |
| 1.09   | 0.149  | 2.57E-13 | GREB1     | 2:11751261   | -0.172  | 0.0215  | 1.24E-15  | FAM27E2 | 9:44973508  |
| -0.258 | 0.023  | 3.35E-29 | GREM2     | 1:240699814  | -0.18   | 0.0248  | 3.93E-13  | FAM27E3 | 9:68400922  |
| -0.311 | 0.0443 | 2.21E-12 | GRID2IP   | 7:6585477    | 0.141   | 0.0155  | 9.31E-20  | FAM27E3 | 9:68400922  |
| 0.16   | 0.0221 | 4.49E-13 | GRK7      | 3:141549404  | 0.0421  | 0.00572 | 1.84E-13  | FAM27E3 | 9:68400922  |
| 3.44   | 0.538  | 1.62E-10 | GSKIP     | 14:96836973  | -0.186  | 0.0269  | 4.70E-12  | FAM27E3 | 9:68400922  |
| 0.233  | 0.037  | 3.03E-10 | GSR       | 8:30536581   | -0.0873 | 0.0128  | 9.08E-12  | FAM27E3 | 9:68400922  |



|          |          |          |           |              |         |         |           |         |             |
|----------|----------|----------|-----------|--------------|---------|---------|-----------|---------|-------------|
| -0.262   | 0.0256   | 1.39E-24 | GSTA1     | 6:52663866   | -0.207  | 0.015   | 2.55E-43  | FBP2    | 9:96374277  |
| -0.542   | 0.0849   | 1.73E-10 | GSTM3     | 1:110260742  | 0.545   | 0.0286  | 5.86E-81  | FBXL18  | 7:61821630  |
| 0.303    | 0.0468   | 9.52E-11 | GSTT1     | 22:24334948  | -2.36   | 0.0869  | 2.06E-162 | FBXL18  | 7:61821560  |
| -0.267   | 0.0316   | 2.93E-17 | GSTT2     | 22:24267047  | -0.782  | 0.0365  | 7.87E-102 | FBXL18  | 7:61821560  |
| -3.92    | 0.435    | 2.03E-19 | GSTT2B    | 22:24267995  | -0.859  | 0.047   | 1.27E-74  | FBXL18  | 7:61821560  |
| 3.99     | 0.46     | 4.18E-18 | GTF2A1L   | 2:48822381   | 0.0409  | 0.00623 | 5.20E-11  | FBXL18  | 7:61821630  |
| 6.77     | 0.704    | 6.81E-22 | GTF2IRD2  | 7:74350606   | 0.178   | 0.0262  | 1.09E-11  | FBXL5   | 4:156014023 |
| -4.32    | 0.695    | 5.11E-10 | GTSF1     | 12:54845050  | 0.261   | 0.0329  | 2.14E-15  | FBXL5   | 4:149003618 |
| 0.241    | 0.0321   | 6.01E-14 | GUCA1A    | 6:42152050   | 0.319   | 0.0254  | 3.55E-36  | FBXO6   | 1:121113600 |
| 2.40E-15 | 2.03E-16 | 2.98E-32 | GUCA1B    | 6:42176743   | 0.253   | 0.0189  | 7.28E-41  | FBXO6   | 1:121113600 |
| 0.261    | 0.021    | 1.83E-35 | GUCA1C    | 3:108441584  | 0.12    | 0.0125  | 7.99E-22  | FBXO6   | 1:121113600 |
| 0.381    | 0.0614   | 5.46E-10 | GUF1      | 4:44667338   | -0.264  | 0.0166  | 5.98E-57  | FBXO6   | 1:120570084 |
| 0.473    | 0.0617   | 1.77E-14 | GVQW1     | 9:32571346   | -0.102  | 0.0128  | 1.60E-15  | FBXO6   | 1:120570084 |
| -1.68    | 0.223    | 4.93E-14 | H3F3A     | 1:226271290  | -0.185  | 0.0213  | 3.77E-18  | FDCSP   | 4:70249195  |
| -0.609   | 0.0697   | 2.38E-18 | HACE1     | 6:105231257  | -0.0996 | 0.0153  | 7.52E-11  | FDCSP   | 4:70249195  |
| -0.332   | 0.024    | 1.60E-43 | HAUS3     | 4:190653610  | 2.74    | 0.197   | 5.61E-44  | FDCSP   | 4:70249195  |
| -0.691   | 0.0727   | 2.00E-21 | HAUS4     | 14:23461583  | 0.166   | 0.024   | 4.62E-12  | FEM1A   | 19:4797319  |
| -0.671   | 0.099    | 1.22E-11 | HBE1      | 11:5270343   | 0.0927  | 0.0108  | 9.22E-18  | FEZ2    | 2:36781138  |
| -0.903   | 0.103    | 1.84E-18 | HBS1L     | 6:135325918  | -0.0975 | 0.0134  | 3.44E-13  | FEZ2    | 2:36779655  |
| -0.492   | 0.0793   | 5.49E-10 | HDHD3     | 9:116106910  | 0.107   | 0.0162  | 3.98E-11  | FEZ2    | 2:36781138  |
| -0.311   | 0.0282   | 2.79E-28 | HEATR3    | 16:50099747  | -0.172  | 0.0169  | 2.50E-24  | FGF6    | 12:37878521 |
| -0.838   | 0.111    | 4.37E-14 | HEXDC     | 17:80389045  | 0.145   | 0.0215  | 1.54E-11  | FGGY    | 1:60228310  |
| 0.138    | 0.0167   | 1.41E-16 | HHLA3     | 1:70821757   | -0.218  | 0.0248  | 1.49E-18  | FGGY    | 1:60228310  |
| 0.998    | 0.118    | 2.73E-17 | HIATL1    | 9:97095226   | -0.187  | 0.0172  | 1.57E-27  | FITM2   | 20:4268744  |
| 0.125    | 0.0144   | 3.94E-18 | HIBCH     | 2:191189558  | 0.174   | 0.0203  | 1.02E-17  | FITM2   | 20:4268744  |
| -1.15    | 0.126    | 7.04E-20 | HIGD1A    | 3:42832466   | -0.139  | 0.02    | 3.65E-12  | FKBP11  | 12:50005454 |
| -0.754   | 0.119    | 2.36E-10 | HIST1H2BA | 6:25647151   | -0.044  | 0.00539 | 3.26E-16  | FKBP14  | 7:29426843  |
| 0.343    | 0.0531   | 1.05E-10 | HIST1H3E  | 6:26208269   | 0.149   | 0.018   | 1.25E-16  | FKBP15  | 9:115401368 |
| -0.249   | 0.0354   | 2.01E-12 | HIST1H4C  | 6:26102708   | -0.406  | 0.0363  | 4.85E-29  | FLT3    | 13:28603277 |
| 10.2     | 1.46     | 2.82E-12 | HIST1H4F  | 6:26254160   | 0.232   | 0.0253  | 4.73E-20  | FLYWCH1 | 16:2982341  |
| -0.746   | 0.118    | 2.58E-10 | HLA-A     | 6:29910286   | -0.546  | 0.0454  | 2.58E-33  | FOPNL   | 16:16470091 |
| -2.95    | 0.407    | 4.22E-13 | HLA-DOB   | 6:32796857   | 1.11    | 0.0359  | 6.59E-210 | FP15737 | 8:23435117  |
| -0.135   | 0.0187   | 5.23E-13 | HLA-DQA2  | 6:32609453   | 0.0742  | 0.00562 | 8.45E-40  | FTCDNL1 | 2:200620763 |
| -0.547   | 0.05     | 7.42E-28 | HLA-DQB2  | 6:32729014   | 0.102   | 0.00635 | 4.64E-58  | FTCDNL1 | 2:200625581 |
| 0.791    | 0.0728   | 1.69E-27 | HLA-DRB1  | 6:32538959   | -2.05   | 0.0582  | 8.78E-272 | FUT6    | 19:55907840 |
| -3.81    | 0.559    | 9.38E-12 | HLA-DRB5  | 6:32367017   | -2.78   | 0.0702  | <1.0E-314 | FUT6    | 19:51493113 |
| -0.23    | 0.0336   | 7.63E-12 | HMBS      | 11:118950217 | 0.166   | 0.0154  | 4.32E-27  | FZR1    | 19:27829622 |
| -0.181   | 0.0279   | 8.73E-11 | HMGCLL1   | 6:55299220   | 0.14    | 0.021   | 2.62E-11  | FZR1    | 19:27829622 |
| -0.114   | 0.0169   | 1.52E-11 | HNRNPA1L2 | 13:53159256  | -0.123  | 0.0158  | 6.98E-15  | GAB4    | 22:17384102 |

|        |        |          |              |              |         |         |           |          |              |
|--------|--------|----------|--------------|--------------|---------|---------|-----------|----------|--------------|
| 2.22   | 0.338  | 5.10E-11 | HNRNPCL1     | 1:13182567   | 0.186   | 0.00822 | 2.31E-113 | GAB4     | 22:17384102  |
| -0.978 | 0.136  | 6.42E-13 | HOMER2       | 15:83503678  | -0.183  | 0.0253  | 4.72E-13  | GAB4     | 22:17387674  |
| 0.176  | 0.0216 | 3.70E-16 | HP           | 16:72108093  | 1.2     | 0.0404  | 7.03E-194 | GAB4     | 22:17384102  |
| -0.793 | 0.115  | 5.36E-12 | HPR          | 16:72108093  | 1.3     | 0.0512  | 3.20E-142 | GABRR1   | 6:89146001   |
| -0.236 | 0.0247 | 1.24E-21 | HRCT1        | 9:35906471   | -0.334  | 0.0447  | 7.90E-14  | GALNT5   | 2:157816254  |
| 0.177  | 0.0248 | 9.53E-13 | HS2ST1       | 1:87521319   | -0.149  | 0.023   | 9.28E-11  | GBP5     | 1:90218376   |
| 2.68   | 0.413  | 8.63E-11 | hsa-mir-1199 | 19:14183577  | 0.197   | 0.021   | 6.54E-21  | GFAP     | 17:42003548  |
| -1.85  | 0.223  | 1.08E-16 | HSBP1L1      | 18:77748525  | -0.244  | 0.0242  | 6.59E-24  | GFER     | 16:29086987  |
| -0.351 | 0.0531 | 3.84E-11 | HSD17B12     | 11:43877934  | -0.207  | 0.0254  | 3.65E-16  | GFER     | 16:16602943  |
| -0.245 | 0.0322 | 2.77E-14 | HSD17B13     | 4:88231392   | 0.22    | 0.0154  | 2.69E-46  | GGT6     | 17:41466688  |
| 0.383  | 0.0504 | 2.98E-14 | HSD17B6      | 12:57219622  | 0.35    | 0.0542  | 1.06E-10  | GINS1    | 20:26109209  |
| 0.232  | 0.0337 | 5.81E-12 | HSD3B1       | 1:120688329  | -0.0742 | 0.00704 | 5.66E-26  | GINS1    | 20:26109209  |
| -0.301 | 0.0413 | 3.14E-13 | HSPB7        | 1:16360316   | -0.161  | 0.0237  | 1.10E-11  | GINS1    | 20:26109209  |
| -0.347 | 0.0505 | 6.36E-12 | HTATIP2      | 11:20385606  | 0.142   | 0.0148  | 8.42E-22  | GINS1    | 20:26109209  |
| -1.35  | 0.217  | 4.93E-10 | HYAL3        | 3:50332697   | -0.206  | 0.0202  | 2.02E-24  | GINS1    | 20:26109209  |
| -3.2   | 0.509  | 3.24E-10 | HYI          | 1:43911162   | -0.126  | 0.0194  | 8.31E-11  | GJA8     | 1:146471769  |
| -0.781 | 0.0746 | 1.20E-25 | IBSP         | 4:88732692   | 0.0427  | 0.00445 | 8.35E-22  | GJA8     | 1:148346958  |
| 0.636  | 0.0758 | 4.84E-17 | IDUA         | 4:190653610  | 2.39    | 0.368   | 8.33E-11  | GJA8     | 1:148346958  |
| 2.64   | 0.32   | 1.58E-16 | IFI27        | 14:94582130  | -0.268  | 0.0373  | 6.72E-13  | GLB1L3   | 11:134855811 |
| 0.684  | 0.0905 | 4.09E-14 | IFI27L1      | 14:94568638  | 0.157   | 0.0222  | 1.53E-12  | GLIPR1L2 | 12:75802773  |
| -0.152 | 0.0221 | 6.08E-12 | IFI27L2      | 14:94595989  | -0.164  | 0.0247  | 3.14E-11  | GLIPR1L2 | 12:75845789  |
| 0.283  | 0.0284 | 2.17E-23 | IFIT5        | 10:91142586  | -0.129  | 0.015   | 7.97E-18  | GLIPR1L2 | 12:75853939  |
| -0.671 | 0.0878 | 2.13E-14 | IFNL3        | 19:39037400  | 0.936   | 0.0965  | 3.03E-22  | GLT6D1   | 9:13861065   |
| -0.301 | 0.0301 | 1.52E-23 | IFT122       | 3:129240437  | -0.176  | 0.0254  | 4.23E-12  | GLT6D1   | 9:13907613   |
| -0.62  | 0.0975 | 2.03E-10 | IFT46        | 11:118453483 | -0.147  | 0.02    | 1.98E-13  | GLYAT    | 11:5794626   |
| -1.62  | 0.246  | 4.54E-11 | IGFLR1       | 19:36254702  | -0.297  | 0.0455  | 6.69E-11  | GNA11    | 19:23912867  |
| 1.86   | 0.273  | 9.55E-12 | IL10RB       | 21:34640788  | 0.247   | 0.0219  | 1.68E-29  | GNA15    | 19:3149990   |
| -0.189 | 0.019  | 2.59E-23 | IL18R1       | 2:102921783  | -0.323  | 0.02    | 1.14E-58  | GNMT     | 6:42928758   |
| 1.71   | 0.262  | 6.72E-11 | IL1RL1       | 2:102951798  | -1.07   | 0.0732  | 2.17E-48  | GNMT     | 6:42928758   |
| -2.38  | 0.233  | 1.71E-24 | IL27         | 16:28620120  | 0.101   | 0.0143  | 1.63E-12  | GNPAT    | 1:232068442  |
| 2.65   | 0.221  | 3.96E-33 | IL32         | 16:3106003   | -0.578  | 0.0854  | 1.30E-11  | GOLGA6L9 | 15:83410535  |
| 3.14   | 0.364  | 6.33E-18 | IL4          | 5:132424046  | 0.0133  | 0.00192 | 4.30E-12  | GP2      | 16:20180187  |
| -0.433 | 0.035  | 3.73E-35 | INO80D       | 2:206970519  | 0.156   | 0.0107  | 3.80E-48  | GP5      | 3:193749905  |
| -0.738 | 0.0966 | 2.18E-14 | INPP1        | 2:191231503  | 0.162   | 0.0153  | 3.38E-26  | GP5      | 3:193749905  |
| 0.263  | 0.0418 | 3.14E-10 | INPP5E       | 9:139322503  | -0.126  | 0.0133  | 2.70E-21  | GPR19    | 12:118275451 |
| -2.03  | 0.261  | 7.38E-15 | IPMK         | 10:60006922  | -0.0782 | 0.0111  | 1.85E-12  | GPR55    | 2:231798099  |
| 1.74   | 0.26   | 2.20E-11 | IPP          | 1:46222493   | -0.141  | 0.0179  | 3.35E-15  | GPR87    | 3:1502342    |
| -0.512 | 0.0768 | 2.62E-11 | IQCB1        | 3:121480038  | 0.266   | 0.0214  | 1.80E-35  | GPRIN2   | 10:4734320   |
| -0.306 | 0.0314 | 1.93E-22 | IQCG         | 3:197635749  | 0.144   | 0.0154  | 8.71E-21  | GPRIN2   | 10:4734320   |

|           |          |          |          |              |         |         |           |           |             |
|-----------|----------|----------|----------|--------------|---------|---------|-----------|-----------|-------------|
| -1.12     | 0.0944   | 1.81E-32 | IQCJ     | 3:159003145  | 0.164   | 0.0186  | 1.17E-18  | GREB1     | 2:113172822 |
| 5.27      | 0.742    | 1.23E-12 | IQGAP1   | 15:90952049  | 0.209   | 0.0317  | 4.31E-11  | GRM6      | 5:1777840   |
| -0.866    | 0.092    | 4.82E-21 | IRF5     | 7:128589427  | 0.204   | 0.0226  | 1.77E-19  | GSTM3     | 1:110260742 |
| 0.876     | 0.0975   | 2.60E-19 | IRX1     | 5:29451631   | -0.216  | 0.0302  | 8.53E-13  | GSTT1     | 22:24334948 |
| 4.31      | 0.68     | 2.32E-10 | IRX6     | 16:55317598  | 0.0163  | 0.00217 | 5.84E-14  | GSTT1     | 22:24334948 |
| -1.48     | 0.206    | 6.75E-13 | ISCU     | 12:108949283 | -0.172  | 0.0193  | 5.02E-19  | GSTT2     | 22:24267047 |
| 0.128     | 0.0176   | 3.52E-13 | ISG15    | 1:144599782  | -4.39   | 0.656   | 2.20E-11  | GSTT2     | 22:24399364 |
| -2.62     | 0.272    | 5.84E-22 | ITGB2    | 21:46328099  | -0.755  | 0.0644  | 9.65E-32  | GSTT2B    | 22:24295103 |
| 2.57      | 0.257    | 1.52E-23 | ITGB3BP  | 1:63851551   | -0.41   | 0.0224  | 7.75E-75  | GUF1      | 4:44687401  |
| -0.592    | 0.0573   | 5.07E-25 | ITGB6    | 2:161126732  | -0.219  | 0.0149  | 6.64E-49  | HAUS3     | 4:190653610 |
| 0.199     | 0.0273   | 3.11E-13 | ITIH4    | 3:52849493   | -0.314  | 0.0431  | 3.21E-13  | HAUS3     | 4:190653610 |
| 1.36      | 0.202    | 1.67E-11 | ITPRIPL1 | 2:96769883   | -0.0654 | 0.0098  | 2.50E-11  | HAUS3     | 4:190653610 |
| 3.79      | 0.601    | 2.86E-10 | JAKMIP3  | 10:133955427 | 0.283   | 0.0158  | 9.61E-72  | HAUS3     | 4:190653610 |
| 0.305     | 0.0269   | 8.48E-30 | KANK4    | 1:62739198   | 0.106   | 0.0103  | 7.72E-25  | HAUS3     | 4:190653610 |
| 0.828     | 0.124    | 2.43E-11 | KANSL2   | 12:49036033  | 0.119   | 0.016   | 1.03E-13  | HES2      | 1:5735297   |
| -1.55     | 0.1      | 3.47E-54 | KATNAL2  | 18:44612975  | -0.174  | 0.0248  | 2.28E-12  | HES2      | 1:60244994  |
| -0.229    | 0.0214   | 1.01E-26 | KCTD20   | 6:36458320   | -0.132  | 0.0129  | 1.42E-24  | HIATL1    | 9:97097081  |
| -2.19     | 0.241    | 1.02E-19 | KCTD21   | 11:77864179  | -0.118  | 0.0143  | 1.56E-16  | HIATL1    | 9:97135769  |
| 3.57      | 0.393    | 1.05E-19 | KDM7A    | 7:139887354  | -0.0816 | 0.0122  | 2.25E-11  | HIGD2A    | 5:175655452 |
| 2.8       | 0.39     | 7.00E-13 | KHDC1L   | 6:73952377   | 0.195   | 0.022   | 7.74E-19  | HIST1H2BA | 6:25647151  |
| -0.568    | 0.084    | 1.36E-11 | KIAA1430 | 4:186125487  | 0.143   | 0.0144  | 3.07E-23  | HIST1H2BA | 6:25647151  |
| 0.131     | 0.015    | 2.47E-18 | KIAA1586 | 6:57408345   | 1.33    | 0.201   | 3.67E-11  | HIST3H3   | 1:229161    |
| 0.458     | 0.0494   | 1.84E-20 | KIAA1614 | 1:180905694  | -0.151  | 0.0221  | 8.34E-12  | HIST3H3   | 1:228156857 |
| 0.887     | 0.112    | 2.38E-15 | KIAA1841 | 2:61379944   | 0.125   | 0.0176  | 1.23E-12  | HLA-DOB   | 6:32796857  |
| -3.33     | 0.446    | 8.24E-14 | KIAA1875 | 8:145164518  | 0.799   | 0.0309  | 2.00E-147 | HLA-DOB   | 6:32796857  |
| 2.08      | 0.303    | 6.66E-12 | KIAA2013 | 1:121113600  | -1.87   | 0.167   | 4.19E-29  | HLA-DRB1  | 6:32538512  |
| -6.6      | 0.892    | 1.37E-13 | KIF25    | 6:168398761  | 0.788   | 0.055   | 1.48E-46  | HLA-DRB1  | 6:32538570  |
| -0.218    | 0.0222   | 9.25E-23 | KIF6     | 6:39693193   | 0.254   | 0.033   | 1.39E-14  | HLA-DRB1  | 6:32542924  |
| 0.26      | 0.024    | 2.39E-27 | KLC3     | 19:45844650  | -0.142  | 0.0144  | 6.14E-23  | HLA-DRB5  | 6:32553446  |
| 6.18      | 0.98     | 2.86E-10 | KLHDC4   | 16:87764267  | 0.256   | 0.0252  | 3.03E-24  | HLA-DRB5  | 6:32497655  |
| -2.56     | 0.369    | 3.99E-12 | KLHL18   | 3:47380499   | -0.271  | 0.0202  | 4.88E-41  | HLA-DRB5  | 6:32497655  |
| -0.471    | 0.0644   | 2.60E-13 | KLKB1    | 4:187119285  | 0.395   | 0.0297  | 2.33E-40  | HNRNPCL1  | 1:13182567  |
| 0.841     | 0.0594   | 1.66E-45 | KLRG2    | 7:139168560  | 0.0283  | 0.00431 | 5.16E-11  | HNRNPCL1  | 1:13182567  |
| 1.11      | 0.155    | 7.99E-13 | KNG1     | 3:186433574  | -0.187  | 0.0119  | 1.21E-55  | HNRNPCL1  | 1:13182567  |
| -0.755    | 0.082    | 3.34E-20 | KNOP1    | 16:19713315  | 0.55    | 0.0306  | 3.12E-72  | HNRNPCL1  | 1:13182567  |
| -1.88E-16 | 2.09E-17 | 2.36E-19 | KRAS     | 12:25379637  | -0.113  | 0.0109  | 3.50E-25  | HNRNPCL1  | 1:13182567  |
| 13.1      | 2.1      | 4.43E-10 | KRBA2    | 17:8279324   | 0.128   | 0.0157  | 3.55E-16  | HOXB9     | 17:47180447 |
| -3.46     | 0.334    | 3.80E-25 | KREMEN2  | 16:33955968  | -1.01   | 0.12    | 3.87E-17  | HP        | 16:72108093 |
| 2.04      | 0.232    | 1.45E-18 | KRR1     | 12:75884876  | 0.167   | 0.0219  | 2.43E-14  | HP        | 16:72108093 |

|        |        |           |          |              |         |         |           |         |              |
|--------|--------|-----------|----------|--------------|---------|---------|-----------|---------|--------------|
| 3.03   | 0.389  | 6.74E-15  | KRT31    | 17:39541804  | 0.268   | 0.0266  | 7.11E-24  | HPR     | 16:72108093  |
| 0.25   | 0.0252 | 3.39E-23  | KRT80    | 12:52595026  | 0.0384  | 0.00326 | 5.00E-32  | HPR     | 16:72108093  |
| 0.86   | 0.128  | 1.83E-11  | KRT81    | 12:52711776  | 0.0924  | 0.0107  | 5.85E-18  | HS2ST1  | 1:87761387   |
| 0.179  | 0.0218 | 2.19E-16  | KRT83    | 12:52702463  | 0.238   | 0.0192  | 2.75E-35  | HSD3B1  | 1:120695304  |
| 6.2    | 0.999  | 5.43E-10  | KRTAP5-7 | 11:71203436  | -0.133  | 0.0204  | 7.05E-11  | HSD3B1  | 1:120692572  |
| -0.248 | 0.0237 | 1.26E-25  | KRTAP5-9 | 11:71238453  | 0.174   | 0.0207  | 4.25E-17  | HSD3B1  | 1:120688329  |
| 4.24   | 0.451  | 5.39E-21  | L3HYPDH  | 14:59953981  | -0.225  | 0.0177  | 5.08E-37  | HSD3B1  | 1:120688329  |
| 2.31   | 0.245  | 4.16E-21  | L3MBTL2  | 22:41492653  | 0.0845  | 0.0117  | 5.11E-13  | IBSP    | 4:88718619   |
| -2.27  | 0.329  | 5.21E-12  | L3MBTL3  | 6:130374461  | -0.101  | 0.0154  | 5.44E-11  | ID2     | 2:87644591   |
| 0.787  | 0.113  | 3.29E-12  | LACTB    | 15:63429062  | 0.0785  | 0.0118  | 2.88E-11  | ID2     | 2:90446736   |
| 0.217  | 0.0338 | 1.36E-10  | LAMC2    | 1:183155305  | 0.0428  | 0.00358 | 6.09E-33  | ID2     | 2:91850402   |
| -0.273 | 0.0311 | 1.66E-18  | LARS2    | 3:45508718   | 0.144   | 0.0172  | 5.66E-17  | IDO1    | 8:40533909   |
| -2.3   | 0.347  | 3.40E-11  | LAYN     | 11:111415800 | -0.166  | 0.0257  | 1.05E-10  | IDUA    | 4:190653610  |
| 0.181  | 0.0234 | 1.03E-14  | LCN1     | 9:138415201  | 0.407   | 0.0174  | 5.30E-121 | IFNA7   | 9:2150504    |
| 0.355  | 0.0347 | 1.45E-24  | LCN15    | 9:139663458  | -0.565  | 0.0344  | 1.28E-60  | IFNAR1  | 21:34370749  |
| -0.346 | 0.0316 | 6.69E-28  | LCN8     | 9:139652080  | -0.126  | 0.0146  | 6.13E-18  | IFNL3   | 19:39037400  |
| 0.154  | 0.0229 | 1.76E-11  | LCN9     | 9:138551902  | 0.078   | 0.0113  | 5.10E-12  | IFNL3   | 19:39037400  |
| -2.45  | 0.209  | 9.78E-32  | LDHAL6A  | 11:18461054  | -0.0825 | 0.00719 | 1.78E-30  | IFNL3   | 19:39037400  |
| -2.7   | 0.0705 | <1.0E-314 | LDHC     | 11:18417583  | 0.445   | 0.0116  | <1.0E-314 | IFNL3   | 19:39037400  |
| -3.34  | 0.219  | 1.62E-52  | LEFTY1   | 1:226099895  | -0.229  | 0.0291  | 3.56E-15  | IFNL3   | 19:39037400  |
| -4.81  | 0.302  | 4.11E-57  | LENG9    | 19:54951059  | -0.0881 | 0.0135  | 6.76E-11  | IFNLR1  | 1:248601069  |
| -3.08  | 0.303  | 2.84E-24  | LGR6     | 1:202185979  | -0.0988 | 0.0121  | 3.21E-16  | IL11    | 19:55325816  |
| -2.76  | 0.21   | 1.87E-39  | LHFPL5   | 6:35787417   | -0.13   | 0.0164  | 2.25E-15  | IL17REL | 22:49594239  |
| -3.45  | 0.307  | 2.66E-29  | LIG3     | 17:33356907  | -0.117  | 0.0109  | 7.05E-27  | IL17REL | 22:49594239  |
| 5.3    | 0.818  | 9.22E-11  | LILRB1   | 19:55125147  | -0.236  | 0.0344  | 6.86E-12  | IL18R1  | 2:102953067  |
| -3.95  | 0.572  | 5.00E-12  | LIMD1    | 3:45700125   | -0.132  | 0.0177  | 8.81E-14  | IL1A    | 2:114152801  |
| -2.22  | 0.317  | 2.50E-12  | LIX1L    | 1:145194076  | -2.37   | 0.336   | 1.74E-12  | IL1RL1  | 2:102930147  |
| 1.18   | 0.159  | 1.16E-13  | LNPEP    | 5:96223833   | -0.0742 | 0.0102  | 3.48E-13  | IL1RN   | 2:114152801  |
| 0.493  | 0.0753 | 5.86E-11  | LOH12CR1 | 12:12619047  | -0.207  | 0.026   | 1.70E-15  | IL20    | 1:206698786  |
| -0.295 | 0.0226 | 6.10E-39  | LONP1    | 19:5691987   | -0.201  | 0.0178  | 1.44E-29  | IL20    | 1:206698786  |
| 0.523  | 0.0625 | 5.86E-17  | LPIN1    | 2:11937158   | 0.233   | 0.0165  | 2.81E-45  | IL20    | 1:207907085  |
| -0.195 | 0.0271 | 6.22E-13  | LPIN2    | 18:2944556   | -0.0887 | 0.0136  | 6.93E-11  | IL37    | 2:114343879  |
| -1.4   | 0.195  | 7.00E-13  | LRCH3    | 3:197609400  | 0.146   | 0.0212  | 5.71E-12  | IL37    | 2:114343879  |
| 0.77   | 0.12   | 1.39E-10  | LRP2BP   | 4:186310213  | -0.248  | 0.0334  | 1.13E-13  | IL4     | 5:132654801  |
| -2.46  | 0.369  | 2.62E-11  | LRPAP1   | 4:3505162    | 0.186   | 0.0194  | 9.01E-22  | IL4     | 5:132424046  |
| 0.0885 | 0.0134 | 3.99E-11  | LRRC2    | 3:46596094   | -0.241  | 0.0236  | 1.75E-24  | INADL   | 1:633277     |
| 0.37   | 0.0587 | 2.91E-10  | LRRC27   | 10:134146084 | 0.243   | 0.0231  | 7.03E-26  | INHBE   | 12:57901422  |
| 6.79   | 1.01   | 1.78E-11  | LRRC37A2 | 17:44314261  | 1.21    | 0.0375  | 2.05E-228 | INMT    | 7:29918301   |
| 0.172  | 0.0249 | 4.93E-12  | LRRC37A3 | 17:62909742  | 0.321   | 0.0296  | 2.12E-27  | INS     | 11:123253755 |

|           |          |          |          |              |         |         |           |           |             |
|-----------|----------|----------|----------|--------------|---------|---------|-----------|-----------|-------------|
| 0.235     | 0.0324   | 4.07E-13 | LRRC55   | 11:56473109  | -2.86   | 0.279   | 1.17E-24  | IQCF6     | 3:51286778  |
| -3.04     | 0.457    | 2.89E-11 | LRRC61   | 7:150037660  | 0.244   | 0.0236  | 4.69E-25  | IREB2     | 15:79257278 |
| -0.55     | 0.0864   | 1.94E-10 | LRRCC1   | 8:86055093   | 0.128   | 0.0182  | 2.02E-12  | IRG1      | 13:76567705 |
| -0.178    | 0.0269   | 3.66E-11 | LRRIQ3   | 1:74663709   | -0.0919 | 0.00745 | 5.83E-35  | IRX1      | 5:29451631  |
| -9.94E-17 | 1.20E-17 | 1.20E-16 | LSG1     | 3:194369579  | 0.299   | 0.0137  | 1.35E-105 | IRX1      | 5:29451631  |
| 11.9      | 1.08     | 3.11E-28 | LURAP1L  | 9:12744670   | 0.19    | 0.0163  | 2.13E-31  | IRX1      | 5:29451631  |
| 9.31      | 1.39     | 2.12E-11 | LXN      | 3:158403318  | 0.142   | 0.0216  | 4.90E-11  | IRX2      | 5:29451631  |
| -5        | 0.8      | 4.10E-10 | LY6D     | 8:143877091  | -0.397  | 0.0244  | 1.60E-59  | IRX2      | 5:29451631  |
| 0.19      | 0.0182   | 1.64E-25 | LY6G6C   | 6:31741659   | 0.0775  | 0.00866 | 3.58E-19  | IRX2      | 5:29451631  |
| 0.181     | 0.0261   | 4.07E-12 | LY6K     | 8:143792357  | 0.159   | 0.0207  | 1.58E-14  | ISG15     | 1:142618462 |
| 4.92      | 0.506    | 2.40E-22 | LYPD1    | 2:133346781  | 0.34    | 0.0417  | 3.54E-16  | ISG15     | 1:144599782 |
| 2.18      | 0.247    | 1.09E-18 | LYPD8    | 1:248818466  | -0.471  | 0.058   | 4.64E-16  | ISG15     | 1:144599782 |
| 0.806     | 0.109    | 1.42E-13 | LYRM2    | 6:90342049   | 0.164   | 0.0147  | 6.66E-29  | ITGB2     | 21:46328099 |
| -3.33     | 0.397    | 4.95E-17 | MADD     | 11:47875178  | -0.204  | 0.0314  | 8.20E-11  | ITGB2     | 21:46328099 |
| 3.27      | 0.404    | 5.77E-16 | MAEL     | 1:166955312  | -0.225  | 0.0184  | 2.20E-34  | ITGB3BP   | 1:63851551  |
| -1.05E-15 | 1.31E-16 | 1.10E-15 | MAN2B2   | 4:6611238    | -0.115  | 0.0126  | 7.04E-20  | ITGB3BP   | 1:63941202  |
| 5.13E-17  | 7.92E-18 | 9.34E-11 | MANBA    | 4:103680984  | -0.185  | 0.0136  | 3.85E-42  | ITK       | 5:156521293 |
| 0.193     | 0.0284   | 1.08E-11 | MAP1LC3A | 20:33136296  | -0.228  | 0.0261  | 2.42E-18  | IYD       | 6:151694262 |
| -0.387    | 0.0376   | 7.61E-25 | MAPK12   | 22:50695270  | -0.248  | 0.0195  | 4.70E-37  | IYD       | 6:151694265 |
| -0.829    | 0.121    | 7.32E-12 | MAPT     | 17:43666385  | -0.134  | 0.0199  | 1.65E-11  | JPH2      | 20:41861625 |
| 1.76      | 0.16     | 3.82E-28 | MB       | 22:36001569  | 0.0928  | 0.0124  | 7.22E-14  | KATNBL1   | 15:34099057 |
| -0.838    | 0.114    | 1.97E-13 | MCFD2    | 2:47136950   | -0.179  | 0.0139  | 6.01E-38  | KCNA7     | 19:49129486 |
| -1.07     | 0.161    | 3.01E-11 | MCM8     | 20:5961458   | -0.126  | 0.0145  | 3.64E-18  | KCNK6     | 19:39490978 |
| -2.82     | 0.389    | 4.19E-13 | MCOLN2   | 1:85474400   | 0.097   | 0.01    | 3.01E-22  | KCTD13    | 16:29961344 |
| 2.21      | 0.341    | 9.12E-11 | MCPH1    | 8:6302154    | 0.12    | 0.0182  | 4.30E-11  | KCTD7     | 7:6526147   |
| -0.23     | 0.0298   | 1.18E-14 | MDH1B    | 2:207645464  | 0.145   | 0.0167  | 3.87E-18  | KIAA0232  | 4:6761192   |
| 0.196     | 0.0271   | 4.74E-13 | MEFV     | 16:33941694  | -1.6    | 0.122   | 2.71E-39  | KIAA0232  | 4:77694232  |
| -2.66     | 0.381    | 2.92E-12 | MEI1     | 22:42193741  | 0.258   | 0.0295  | 2.22E-18  | KIAA1143  | 3:44126376  |
| -0.2      | 0.0293   | 8.74E-12 | METTL18  | 1:169758564  | -0.284  | 0.0236  | 2.36E-33  | KIAA1143  | 3:44126376  |
| 1.77      | 0.251    | 1.77E-12 | METTL21B | 12:58188696  | 0.146   | 0.0158  | 2.45E-20  | KIAA1586  | 6:57408345  |
| -1.97     | 0.239    | 1.68E-16 | MGC10955 | 2:74347525   | 0.436   | 0.016   | 1.66E-163 | KIAA1586  | 6:57447737  |
| -2.38     | 0.256    | 1.45E-20 | MGLL     | 3:127394280  | 0.114   | 0.0153  | 9.26E-14  | KIAA1875  | 8:145164518 |
| 1.88      | 0.224    | 4.74E-17 | MGMT     | 10:131265545 | -0.498  | 0.0381  | 4.83E-39  | KIAA1875  | 8:145175529 |
| 7.47      | 0.793    | 4.51E-21 | MGRN1    | 16:4737383   | 0.0969  | 0.0142  | 8.86E-12  | KIAA2013  | 1:121113600 |
| -6.76     | 1.08     | 3.87E-10 | MICB     | 6:31474000   | 0.116   | 0.0167  | 3.76E-12  | KIAA2013  | 1:121113600 |
| -0.157    | 0.0217   | 4.65E-13 | MIIP     | 1:121113600  | -3.75   | 0.403   | 1.34E-20  | KIAA2013  | 1:121113600 |
| -0.266    | 0.0294   | 1.46E-19 | MLANA    | 9:68457329   | -0.176  | 0.00742 | 2.26E-124 | KIAA2013  | 1:121113600 |
| -3.34     | 0.529    | 2.72E-10 | MLH3     | 14:75463848  | -0.152  | 0.0152  | 1.52E-23  | KIAA2013  | 1:121113600 |
| -1.66     | 0.26     | 1.72E-10 | MLK4     | 1:233529472  | 0.327   | 0.0163  | 1.61E-89  | KIDINS220 | 2:90446736  |

|           |          |          |          |              |         |         |          |           |             |
|-----------|----------|----------|----------|--------------|---------|---------|----------|-----------|-------------|
| 0.293     | 0.0427   | 6.80E-12 | MMP26    | 11:51577085  | -0.0374 | 0.0046  | 4.28E-16 | KIDINS220 | 2:90446736  |
| -1.27     | 0.168    | 4.05E-14 | MMP7     | 11:102401633 | 0.0315  | 0.00473 | 2.75E-11 | KIF25     | 6:168391579 |
| 2.65      | 0.393    | 1.55E-11 | MMRN1    | 4:90811007   | 0.311   | 0.0288  | 3.49E-27 | KLB       | 4:3860612   |
| -4.35     | 0.545    | 1.44E-15 | MOCS2    | 5:52399688   | -0.24   | 0.0214  | 3.44E-29 | KLB       | 4:40436032  |
| -0.19     | 0.0276   | 5.82E-12 | MON1B    | 16:77232746  | -0.0889 | 0.013   | 8.00E-12 | KLB       | 4:40436032  |
| -2.82     | 0.423    | 2.62E-11 | MPC2     | 1:167923678  | -0.156  | 0.0236  | 3.84E-11 | KRBA2     | 17:80989217 |
| -3.99     | 0.581    | 6.54E-12 | MPHOSPH6 | 16:82184200  | -0.314  | 0.0184  | 2.69E-65 | KRBA2     | 17:77160151 |
| 0.224     | 0.0314   | 9.77E-13 | MPI      | 15:75206225  | 0.104   | 0.0146  | 1.05E-12 | KRCC1     | 2:87644591  |
| 0.291     | 0.0393   | 1.32E-13 | MPPE1    | 18:11905953  | -0.177  | 0.0128  | 1.72E-43 | KREMEN2   | 16:33533441 |
| 7.36      | 1.16     | 2.23E-10 | MRC1     | 10:18229566  | -0.112  | 0.00752 | 3.63E-50 | KREMEN2   | 16:32104335 |
| -1.24     | 0.173    | 7.63E-13 | MRC1L1   | 10:18249664  | 0.0941  | 0.0101  | 1.20E-20 | KREMEN2   | 16:33533441 |
| -1.52     | 0.236    | 1.19E-10 | MRFAP1L1 | 4:6709687    | -0.128  | 0.00962 | 2.15E-40 | KREMEN2   | 16:34015761 |
| -0.723    | 0.105    | 5.75E-12 | MRI1     | 19:13871830  | -0.225  | 0.0231  | 2.03E-22 | KREMEN2   | 16:34190292 |
| -0.536    | 0.0463   | 5.41E-31 | MRM1     | 17:34963333  | -0.121  | 0.0172  | 1.99E-12 | KRT27     | 17:38642290 |
| 0.541     | 0.0845   | 1.53E-10 | MRPL10   | 17:45890898  | -0.144  | 0.0122  | 3.75E-32 | KRT75     | 12:52492131 |
| 0.139     | 0.0212   | 5.50E-11 | MRPL18   | 6:160211445  | -0.188  | 0.02    | 5.46E-21 | KRT75     | 12:52613830 |
| 0.72      | 0.112    | 1.29E-10 | MRPL19   | 2:75878511   | -0.247  | 0.0186  | 3.04E-40 | KRT83     | 12:52720482 |
| 0.213     | 0.0265   | 9.15E-16 | MRPL21   | 11:68669496  | -0.301  | 0.0215  | 1.56E-44 | KRT84     | 12:53343231 |
| -4.14     | 0.662    | 4.01E-10 | MRPL24   | 1:156699977  | -0.294  | 0.0386  | 2.60E-14 | KRTAP10-2 | 21:46872370 |
| -9.12E-15 | 9.54E-16 | 1.18E-21 | MRPL53   | 2:74678921   | -0.158  | 0.0216  | 2.58E-13 | KRTAP1-4  | 17:39968701 |
| -2.43     | 0.39     | 4.64E-10 | MRPS10   | 6:42191176   | 0.162   | 0.014   | 5.75E-31 | KRTAP19-2 | 21:31730168 |
| -2.74     | 0.249    | 3.65E-28 | MRPS17   | 7:56008918   | -0.107  | 0.0133  | 8.62E-16 | KRTAP19-6 | 21:31193155 |
| 4.89      | 0.717    | 9.10E-12 | MRPS26   | 20:25904151  | -1.36   | 0.175   | 7.76E-15 | KRTAP22-2 | 21:32471803 |
| 4.04      | 0.553    | 2.76E-13 | MRTO4    | 1:19579312   | -0.194  | 0.0271  | 8.15E-13 | KRTAP22-2 | 21:31562202 |
| -4.3      | 0.526    | 2.96E-16 | MS4A5    | 11:59988193  | 0.0109  | 0.00165 | 3.95E-11 | KTN1      | 14:56654212 |
| -5.7      | 0.883    | 1.08E-10 | MSH3     | 5:79960955   | -0.0833 | 0.00944 | 1.10E-18 | L1TD1     | 1:633277    |
| 0.291     | 0.0393   | 1.32E-13 | MSH4     | 1:76258518   | 0.0454  | 0.0062  | 2.43E-13 | L3HYPDH   | 14:60018584 |
| 1.62      | 0.218    | 1.08E-13 | MTFR1L   | 1:26143704   | -0.0743 | 0.0111  | 2.18E-11 | LAMC2     | 1:183155305 |
| 2.54      | 0.337    | 4.81E-14 | MTHFR    | 1:121113600  | -4.43   | 0.323   | 8.24E-43 | LAPTM4A   | 2:194495397 |
| -0.23     | 0.0334   | 5.73E-12 | MTHFS    | 15:80121160  | 0.125   | 0.0171  | 2.67E-13 | LAPTM4A   | 2:194495397 |
| -0.165    | 0.0262   | 3.02E-10 | MTOR     | 1:121113600  | 1.74    | 0.162   | 6.55E-27 | LBP       | 20:36447486 |
| -0.124    | 0.017    | 3.01E-13 | MTRNR2L4 | 16:33941694  | -0.179  | 0.0241  | 1.11E-13 | LBP       | 20:36920560 |
| -1.46     | 0.222    | 4.81E-11 | MTRR     | 5:7862381    | -0.14   | 0.0138  | 3.49E-24 | LCE1E     | 1:153555057 |
| 0.978     | 0.157    | 4.69E-10 | MUC4     | 3:195671091  | -0.175  | 0.0174  | 8.52E-24 | LCE2B     | 1:153602096 |
| -0.567    | 0.0653   | 3.85E-18 | MUL1     | 1:20826782   | -0.15   | 0.0124  | 1.10E-33 | LCE2D     | 1:152823789 |
| -16.8     | 2.41     | 3.15E-12 | MXD3     | 5:176740244  | -0.211  | 0.0271  | 6.92E-15 | LCE3A     | 1:152784023 |
| -2.15     | 0.153    | 7.46E-45 | MXRA7    | 17:74706380  | -0.115  | 0.0104  | 2.01E-28 | LCE3C     | 1:153485794 |
| -2.99     | 0.462    | 9.68E-11 | MYADML2  | 17:79898644  | -0.252  | 0.0235  | 7.90E-27 | LCE3E     | 1:152770613 |
| -3.75     | 0.438    | 1.11E-17 | MYLK4    | 6:2774052    | 0.0569  | 0.00743 | 1.89E-14 | LCN1      | 9:138415201 |

|        |        |          |           |              |         |         |           |          |             |
|--------|--------|----------|-----------|--------------|---------|---------|-----------|----------|-------------|
| 0.178  | 0.0256 | 3.57E-12 | MZT2A     | 2:132235137  | -0.434  | 0.0366  | 1.96E-32  | LCN1     | 9:138415201 |
| -0.127 | 0.0161 | 3.07E-15 | N6AMT1    | 21:30207782  | -0.164  | 0.015   | 7.99E-28  | LCN1     | 9:138415201 |
| -0.983 | 0.149  | 4.19E-11 | NAGS      | 17:42088389  | -0.32   | 0.0295  | 2.05E-27  | LDHAL6A  | 11:18417583 |
| 0.447  | 0.0507 | 1.18E-18 | NAIP      | 5:70429598   | 0.483   | 0.0392  | 6.95E-35  | LDHC     | 11:18432033 |
| 0.219  | 0.0339 | 1.05E-10 | NAPRT1    | 8:144676862  | 0.838   | 0.0349  | 2.11E-127 | LDHC     | 11:18421237 |
| 2.55   | 0.389  | 5.55E-11 | NARS2     | 11:78282632  | 0.17    | 0.0201  | 2.73E-17  | LDHC     | 11:18432033 |
| -0.553 | 0.0697 | 2.12E-15 | NBPF12    | 1:146391234  | -0.423  | 0.0375  | 1.65E-29  | LEPROTL1 | 8:2958662   |
| -0.302 | 0.0359 | 4.02E-17 | NBPF16    | 1:148531065  | 0.304   | 0.0284  | 9.72E-27  | LGALS9B  | 17:21200341 |
| -2.04  | 0.256  | 1.60E-15 | NCBP2     | 3:196574607  | -0.0884 | 0.0117  | 4.17E-14  | LGALS9B  | 17:21326832 |
| -0.441 | 0.0434 | 2.95E-24 | NCKIPSD   | 3:48744484   | 0.176   | 0.0211  | 7.35E-17  | LIAS     | 4:4019330   |
| -2.57  | 0.35   | 2.09E-13 | NDUFAP1   | 15:41626148  | -0.183  | 0.0126  | 8.56E-48  | LIAS     | 4:4019330   |
| -9.2   | 1.48   | 5.09E-10 | NFKBIB    | 19:39398416  | 0.125   | 0.0159  | 3.79E-15  | LILRA3   | 19:5407203  |
| -0.227 | 0.0171 | 3.24E-40 | NHLH2     | 1:116372092  | -0.108  | 0.014   | 1.22E-14  | LIX1L    | 1:145194076 |
| 0.229  | 0.0281 | 3.66E-16 | NINJ1     | 9:95882901   | -0.174  | 0.0261  | 2.62E-11  | LIX1L    | 1:145194076 |
| 0.186  | 0.0276 | 1.59E-11 | NIPSNAP3A | 9:107519449  | -0.153  | 0.0197  | 8.07E-15  | LIX1L    | 1:145194076 |
| 0.314  | 0.0373 | 3.82E-17 | NKAIN1    | 1:31678626   | 0.345   | 0.02    | 1.12E-66  | LIX1L    | 1:145194076 |
| 0.25   | 0.0314 | 1.70E-15 | NKAIN4    | 20:61881911  | 0.577   | 0.0664  | 3.63E-18  | LIX1L    | 1:145194076 |
| 0.441  | 0.054  | 3.17E-16 | NLGN2     | 17:7322440   | -0.106  | 0.0137  | 1.02E-14  | LMCD1    | 3:77832420  |
| 1.17   | 0.137  | 1.34E-17 | NLRP2     | 19:55474210  | 0.495   | 0.0303  | 5.42E-60  | LOXHD1   | 18:4491075  |
| 0.284  | 0.0403 | 1.83E-12 | NME5      | 5:137546642  | -0.363  | 0.0509  | 9.92E-13  | LRRC37A2 | 17:43678071 |
| 0.584  | 0.0673 | 4.04E-18 | NME9      | 3:138033181  | 0.138   | 0.0184  | 6.38E-14  | LRRC37A2 | 17:43666385 |
| 1.69   | 0.248  | 9.46E-12 | NMRK1     | 9:77707300   | -0.399  | 0.0153  | 6.41E-150 | LRRC37A2 | 17:43687268 |
| -0.227 | 0.0171 | 3.24E-40 | NMUR1     | 2:232379712  | -0.0286 | 0.00428 | 2.35E-11  | LRRC47   | 1:39284122  |
| 0.229  | 0.0281 | 3.66E-16 | NMUR2     | 5:151841898  | -0.0815 | 0.0105  | 8.37E-15  | LRRC55   | 11:56473109 |
| 0.186  | 0.0276 | 1.59E-11 | NOB1      | 16:69782855  | 0.0783  | 0.0114  | 6.49E-12  | LRRC55   | 11:56473109 |
| 0.314  | 0.0373 | 3.82E-17 | NODAL     | 10:72155879  | 0.0901  | 0.0108  | 7.27E-17  | LRRC55   | 11:56473109 |
| 0.25   | 0.0314 | 1.70E-15 | NOMO2     | 16:18433187  | -0.27   | 0.0409  | 4.07E-11  | LRRC55   | 11:56473109 |
| 0.441  | 0.054  | 3.17E-16 | NOP10     | 15:34632686  | -0.295  | 0.0312  | 3.23E-21  | LRRC55   | 11:56473109 |
| 1.17   | 0.137  | 1.34E-17 | NOP14     | 4:3597137    | -2.4    | 0.189   | 6.03E-37  | LRRN4CL  | 11:62226112 |
| 0.284  | 0.0403 | 1.83E-12 | NOS1      | 12:117902158 | -0.0949 | 0.0137  | 4.30E-12  | LSG1     | 3:194369579 |
| 0.584  | 0.0673 | 4.04E-18 | NOTCH4    | 6:32178773   | -0.127  | 0.0193  | 4.69E-11  | LSG1     | 3:194369579 |
| 1.69   | 0.248  | 9.46E-12 | NOXRED1   | 14:77863091  | -0.0425 | 0.00553 | 1.53E-14  | MAP1LC3C | 1:242657380 |
|        |        |          | NPHP3     | 3:132438099  | -0.372  | 0.0284  | 3.35E-39  | MBNL2    | 13:97373613 |
|        |        |          | NPIPA1    | 16:15129940  | -0.189  | 0.0267  | 1.46E-12  | MDM4     | 1:204094781 |
|        |        |          | NPIPA2    | 16:15220753  | 0.836   | 0.0412  | 1.54E-91  | MEFV     | 16:33991563 |
|        |        |          | NPIPA5    | 16:15045766  | 1.06    | 0.0714  | 7.39E-50  | MEFV     | 16:33941694 |
|        |        |          | NPIPA8    | 16:18441762  | 1.09    | 0.0735  | 9.38E-50  | MEFV     | 16:33941694 |
|        |        |          | NPIP6     | 16:28708127  | 0.132   | 0.0184  | 7.29E-13  | MEFV     | 16:33941694 |
|        |        |          | NPIP7     | 16:28495752  | -0.375  | 0.0255  | 5.91E-49  | MEFV     | 16:33941694 |

|         |             |         |         |           |          |              |
|---------|-------------|---------|---------|-----------|----------|--------------|
| NPIPB9  | 16:28823755 | -0.19   | 0.0277  | 6.92E-12  | MESDC1   | 15:80955534  |
| NPM1    | 5:170808238 | -0.179  | 0.0113  | 1.63E-56  | MGC10955 | 2:74344685   |
| NPSR1   | 7:34718523  | 0.0295  | 0.00386 | 2.13E-14  | MGC10955 | 2:74342260   |
| NPY2R   | 4:156084560 | 0.342   | 0.0178  | 2.85E-82  | MICALCL  | 11:123453335 |
| NRBF2   | 10:64914518 | -0.177  | 0.0175  | 4.77E-24  | MICALCL  | 11:123784212 |
| NRG4    | 15:76308132 | 0.435   | 0.0256  | 9.38E-65  | MIF      | 22:25056098  |
| NSA2    | 5:74155991  | 0.475   | 0.0288  | 4.12E-61  | MIIP     | 1:121113600  |
| NSUN2   | 5:6618323   | -0.517  | 0.0164  | 4.02E-218 | MIIP     | 1:121113600  |
| NSUN6   | 10:18939070 | 0.109   | 0.0162  | 1.72E-11  | MIIP     | 1:121113600  |
| NUP107  | 12:69077497 | -0.12   | 0.0183  | 5.48E-11  | MIIP     | 1:121113600  |
| NUP210L | 1:153666248 | 0.115   | 0.00897 | 1.26E-37  | MIIP     | 1:121113600  |
| NUP85   | 17:73192415 | -0.201  | 0.0176  | 3.31E-30  | MKRN1    | 7:139713109  |
| NUPL2   | 7:23224367  | -0.163  | 0.0148  | 3.29E-28  | MKRN1    | 7:139713109  |
| NUPR1L  | 7:56104688  | 0.38    | 0.0342  | 1.11E-28  | MLANA    | 9:68457329   |
| NUSAP1  | 15:41642036 | 0.158   | 0.0146  | 2.71E-27  | MLANA    | 9:68457329   |
| NWD1    | 19:16829435 | -0.315  | 0.0389  | 5.60E-16  | MLANA    | 9:68457329   |
| OBP2A   | 9:138436299 | -0.106  | 0.0098  | 2.88E-27  | MLANA    | 9:68457329   |
| OCLN    | 5:69783228  | -0.112  | 0.0173  | 9.54E-11  | MLANA    | 9:68457329   |
| OPA3    | 19:46056620 | -0.124  | 0.0152  | 3.41E-16  | MLK4     | 1:233514934  |
| OPN1SW  | 7:128479367 | 0.146   | 0.0205  | 1.06E-12  | MLK4     | 1:233529472  |
| OPN4    | 10:88381941 | -0.329  | 0.0203  | 4.51E-59  | MMP1     | 11:103154832 |
| OR10H5  | 19:15885942 | 0.0457  | 0.0046  | 2.94E-23  | MMP1     | 11:103154832 |
| OR11H1  | 22:16880695 | -0.0685 | 0.0102  | 1.87E-11  | MMP26    | 11:51577085  |
| OR1A2   | 17:21210337 | -0.129  | 0.0201  | 1.38E-10  | MPDU1    | 17:80989217  |
| OR1D2   | 17:21538565 | -0.0447 | 0.00693 | 1.12E-10  | MPHOSPH6 | 16:82186383  |
| OR1D5   | 17:25335635 | -0.0935 | 0.0108  | 4.83E-18  | MPHOSPH6 | 16:82167073  |
| OR2L13  | 1:248128929 | 0.331   | 0.0251  | 1.04E-39  | MPHOSPH6 | 16:82167278  |
| OR2L2   | 1:248128929 | 0.0874  | 0.00934 | 8.16E-21  | MPPE1    | 18:11905953  |
| OR4A47  | 11:48388105 | -0.107  | 0.0139  | 1.38E-14  | MRFAP1L1 | 4:6709687    |
| OR51A7  | 11:51575314 | -0.07   | 0.0105  | 2.62E-11  | MRGPRX3  | 11:1902983   |
| OR51B4  | 11:48356870 | -0.184  | 0.0212  | 3.98E-18  | MRGPRX3  | 11:1902983   |
| OR51E2  | 11:4755611  | 0.0845  | 0.00543 | 1.33E-54  | MRPL10   | 17:45936427  |
| OR51I1  | 11:48355553 | -0.133  | 0.0183  | 3.65E-13  | MRPL14   | 6:44207850   |
| OR51I2  | 11:61862695 | 0.209   | 0.0183  | 3.29E-30  | MRPL21   | 11:68681769  |
| OR52B6  | 11:56470894 | -0.0606 | 0.00814 | 9.72E-14  | MRPS10   | 6:42164270   |
| OR52E6  | 11:51577359 | -0.0828 | 0.00981 | 3.16E-17  | MRPS33   | 7:140367431  |
| OR52K2  | 11:48350545 | -0.0935 | 0.0141  | 3.33E-11  | MS4A3    | 11:58985363  |
| OR52N5  | 11:48373976 | -0.122  | 0.0163  | 7.17E-14  | MS4A5    | 11:59988193  |
| OR56A1  | 11:56470865 | -0.0834 | 0.011   | 3.41E-14  | MT1B     | 16:57156709  |



|          |              |         |         |           |          |             |
|----------|--------------|---------|---------|-----------|----------|-------------|
| OR5I1    | 11:55044296  | -0.0238 | 0.00347 | 6.94E-12  | MTFMT    | 15:64345880 |
| OR6B3    | 2:240988851  | 0.14    | 0.00756 | 1.46E-76  | MTHFR    | 1:121113600 |
| OR6V1    | 7:142116439  | -0.124  | 0.00911 | 3.43E-42  | MTHFR    | 1:121113600 |
| OR7C1    | 19:14932957  | 0.0671  | 0.0101  | 3.06E-11  | MTHFR    | 1:121113600 |
| ORC6     | 16:46402985  | 0.962   | 0.144   | 2.38E-11  | MTHFR    | 1:121113600 |
| OSBPL11  | 3:125467425  | 0.22    | 0.0336  | 5.85E-11  | MTHFR    | 1:121113600 |
| OSBPL5   | 11:3109284   | -0.14   | 0.0166  | 3.35E-17  | MTMR12   | 5:3127233   |
| OSCP1    | 1:36886117   | 0.206   | 0.0245  | 4.16E-17  | MTOR     | 1:121113600 |
| OTUD3    | 1:20233086   | 0.365   | 0.0328  | 9.16E-29  | MTOR     | 1:121113600 |
| OVGP1    | 1:111933638  | -0.166  | 0.0237  | 2.48E-12  | MTOR     | 1:121113600 |
| OVOL1    | 11:65551648  | 0.0559  | 0.00552 | 4.20E-24  | MTOR     | 1:121113600 |
| OXGR1    | 13:97647188  | -0.0948 | 0.0142  | 2.45E-11  | MTOR     | 1:121113600 |
| OXTR     | 3:8811646    | 0.352   | 0.0351  | 1.14E-23  | MTRNR2L4 | 16:33941694 |
| PAAF1    | 11:73622667  | -0.244  | 0.0327  | 8.54E-14  | MTRNR2L4 | 16:33941694 |
| PACRG    | 6:163037975  | 0.26    | 0.0256  | 3.11E-24  | MTRNR2L4 | 16:33941694 |
| PADI4    | 1:17673102   | 0.538   | 0.0188  | 4.13E-180 | MTRNR2L4 | 16:33941694 |
| PAH      | 12:103351826 | 0.177   | 0.0214  | 1.33E-16  | MTRNR2L4 | 16:33941694 |
| PAOX     | 10:135196301 | 0.128   | 0.0195  | 5.23E-11  | MUC4     | 3:195412486 |
| PAX8     | 2:113978650  | -0.277  | 0.016   | 3.79E-67  | MUC4     | 3:195670876 |
| PCDHA10  | 5:140266942  | -0.512  | 0.0381  | 3.61E-41  | MUC4     | 3:195344123 |
| PCDHA13  | 5:140239423  | -0.253  | 0.0151  | 5.21E-63  | MUC4     | 3:195344161 |
| PCDHA7   | 5:140120733  | -0.0804 | 0.012   | 2.08E-11  | MUC6     | 11:13767506 |
| PCDHA9   | 5:140229368  | -0.0735 | 0.00735 | 1.52E-23  | MUL1     | 1:21790318  |
| PCDHAC1  | 5:140242479  | 0.102   | 0.0126  | 5.72E-16  | MYBL2    | 20:41863339 |
| PCDHB10  | 5:140522829  | -0.0835 | 0.0121  | 5.17E-12  | MYBPH    | 1:203714629 |
| PCDHB12  | 5:140565046  | -0.0847 | 0.0109  | 7.81E-15  | MYL12B   | 18:33443    |
| PCDHB2   | 5:140464559  | 0.142   | 0.017   | 6.66E-17  | MYL12B   | 18:29937076 |
| PCDHB3   | 5:140502343  | 0.0805  | 0.0119  | 1.34E-11  | MYLK3    | 16:46464024 |
| PCDHB8   | 5:140539727  | 0.127   | 0.012   | 3.56E-26  | NAMPTL   | 10:36973081 |
| PCDHGA6  | 5:140737947  | -0.286  | 0.0429  | 2.62E-11  | NANOG    | 12:73094439 |
| PCNXL4   | 14:60477929  | 0.121   | 0.0188  | 1.23E-10  | NANP     | 20:25904151 |
| PCSK9    | 1:55505668   | -0.0516 | 0.00797 | 9.53E-11  | NANP     | 20:25904151 |
| PDCD1LG2 | 9:5509678    | 0.0389  | 0.00516 | 4.74E-14  | NANP     | 20:25904151 |
| PDHB     | 3:58380465   | 0.0935  | 0.012   | 6.61E-15  | NANP     | 20:25904151 |
| PDLIM5   | 4:95576397   | 0.172   | 0.024   | 7.68E-13  | NAPRT1   | 8:144676862 |
| PDPR     | 16:70195967  | 0.573   | 0.0441  | 1.34E-38  | NAPRT1   | 8:144683934 |
| PDXDC1   | 16:15399294  | 0.106   | 0.0154  | 5.86E-12  | NAPRT1   | 8:144683934 |
| PDZK1IP1 | 1:47655816   | 0.159   | 0.0238  | 2.38E-11  | NCF1     | 7:73549837  |
| PDZRN4   | 12:41832683  | 0.182   | 0.018   | 4.93E-24  | NDUFA8   | 9:124891476 |

|            |              |         |         |          |          |             |
|------------|--------------|---------|---------|----------|----------|-------------|
| PEBP4      | 8:22570783   | -0.297  | 0.0311  | 1.30E-21 | NDUFAF1  | 15:41648737 |
| PEX6       | 6:42925683   | 0.238   | 0.0202  | 4.82E-32 | NDUFC1   | 4:139948061 |
| PGA3       | 11:60961842  | -0.099  | 0.0149  | 3.05E-11 | NDUFC1   | 4:139948055 |
| PHLDA2     | 11:2988587   | 0.301   | 0.0354  | 1.85E-17 | NFATC2IP | 16:29092297 |
| PI4K2B     | 4:25159390   | -0.272  | 0.0301  | 1.62E-19 | NKAIN1   | 1:31678626  |
| PIF1       | 15:65136471  | -0.179  | 0.0191  | 7.14E-21 | NLRP6    | 11:1018012  |
| PIGH       | 14:68066559  | -0.0899 | 0.0112  | 1.00E-15 | NLRP6    | 11:12087993 |
| PIGN       | 18:59734744  | -0.0853 | 0.0124  | 6.03E-12 | NMRK1    | 9:77701908  |
| PIGZ       | 3:196675994  | 0.15    | 0.0162  | 2.06E-20 | NMRK1    | 9:77707300  |
| PISD       | 22:32015162  | 0.142   | 0.0216  | 4.90E-11 | NOL7     | 6:145416470 |
| PKMYT1     | 16:3057622   | 0.135   | 0.0186  | 3.93E-13 | NOL7     | 6:127760380 |
| PKP1       | 1:201208962  | -0.117  | 0.0159  | 1.86E-13 | NOL9     | 1:5735297   |
| PLCD1      | 3:38053206   | -0.258  | 0.038   | 1.13E-11 | NOL9     | 1:5735297   |
| PLEKHH2    | 2:43881850   | 0.176   | 0.0257  | 7.48E-12 | NOP14    | 4:3597137   |
| PLXNA2     | 1:208372139  | -0.128  | 0.0161  | 1.86E-15 | NOP14    | 4:3597137   |
| PM20D1     | 1:205767885  | -0.0598 | 0.00447 | 8.12E-41 | NOP14    | 4:3597137   |
| PMF1-BGLAP | 1:156307593  | -0.257  | 0.0386  | 2.78E-11 | NOP14    | 4:3597137   |
| POLE3      | 9:116210763  | -0.177  | 0.0229  | 1.08E-14 | NOP14    | 4:3597137   |
| POLM       | 7:44111189   | 0.196   | 0.0267  | 2.12E-13 | NPIPA2   | 16:15220753 |
| POLR1B     | 2:113305424  | 0.16    | 0.0162  | 5.26E-23 | NPIPA2   | 16:15211229 |
| POLR1D     | 13:28196033  | 0.176   | 0.0216  | 3.70E-16 | NPIPA5   | 16:15045766 |
| POLR1E     | 9:37489064   | -0.109  | 0.0146  | 8.28E-14 | NPIP7    | 16:28539293 |
| POLR2C     | 16:57439588  | 0.0899  | 0.0128  | 2.16E-12 | NPM1     | 5:170803458 |
| POLR2J     | 7:102114424  | 0.453   | 0.0232  | 6.62E-85 | NPY2R    | 4:156084560 |
| POM121C    | 7:75081418   | 0.116   | 0.0103  | 2.02E-29 | NRG4     | 15:76308132 |
| POM121L2   | 6:27454446   | 0.0323  | 0.00444 | 3.47E-13 | NSA2     | 5:74002438  |
| POMC       | 2:25384456   | 0.987   | 0.0584  | 4.45E-64 | NSUN2    | 5:6619733   |
| POMGNT2    | 3:43111239   | 0.109   | 0.0164  | 3.00E-11 | NSUN2    | 5:6619733   |
| POP5       | 12:120912240 | 0.119   | 0.0162  | 2.05E-13 | NSUN2    | 5:6619733   |
| POTEC      | 18:14535287  | 0.00901 | 0.00129 | 2.86E-12 | NTN3     | 16:32117785 |
| POTEM      | 14:19011416  | -0.099  | 0.0134  | 1.49E-13 | NTN3     | 16:32601856 |
| PPA2       | 4:106286947  | 0.249   | 0.016   | 1.31E-54 | NTN3     | 16:32117769 |
| PPFIA1     | 11:70156584  | -0.0977 | 0.0147  | 3.01E-11 | NTN3     | 16:33941694 |
| PPIL3      | 2:201754063  | -0.283  | 0.0184  | 2.21E-53 | NUBPL    | 14:31747848 |
| PPM1M      | 3:52341215   | -0.165  | 0.0189  | 2.54E-18 | NUDT19   | 19:32801840 |
| PPM1N      | 19:46006212  | -0.164  | 0.02    | 2.40E-16 | NUDT19   | 19:32815142 |
| PPP2R1B    | 11:111648809 | -0.199  | 0.0216  | 3.17E-20 | NUDT19   | 19:32454194 |
| PPP2R3C    | 14:35625068  | -0.133  | 0.0183  | 3.65E-13 | NUGGC    | 8:27601280  |
| PPP3CC     | 8:22337996   | -0.11   | 0.0105  | 1.11E-25 | NUGGC    | 8:27710767  |

|          |             |         |         |           |         |              |
|----------|-------------|---------|---------|-----------|---------|--------------|
| PPP4C    | 16:30092048 | -0.0881 | 0.0129  | 8.52E-12  | NUP210L | 1:153666248  |
| PRAMEF12 | 1:121363032 | -0.0219 | 0.00334 | 5.49E-11  | NXPE1   | 11:114003674 |
| PRAMEF26 | 1:12908500  | -0.0308 | 0.00355 | 4.10E-18  | NXPE1   | 11:114003674 |
| PRAMEF6  | 1:121141536 | -0.0466 | 0.00579 | 8.39E-16  | OARD1   | 6:405873     |
| PRB2     | 12:11592075 | 0.258   | 0.0272  | 2.42E-21  | OAT     | 10:126677160 |
| PRDM15   | 21:43296188 | 0.119   | 0.0169  | 1.90E-12  | OCIAD2  | 4:49566198   |
| PRPH2    | 6:42672434  | 0.401   | 0.0186  | 4.35E-103 | OCIAD2  | 4:49209318   |
| PRR23D1  | 8:7640939   | 0.0417  | 0.00394 | 3.54E-26  | OCIAD2  | 4:49209318   |
| PRR23D2  | 8:7640939   | 0.0417  | 0.00394 | 3.54E-26  | OPA1    | 3:193749905  |
| PRSS1    | 7:142461921 | -0.182  | 0.0169  | 4.81E-27  | OR10A6  | 11:7835477   |
| PRSS33   | 16:33941694 | -0.528  | 0.0507  | 2.14E-25  | OR11H1  | 22:16880695  |
| PRSS36   | 16:31154146 | -0.0998 | 0.0154  | 9.14E-11  | OR11H1  | 22:16880695  |
| PSCA     | 8:143773166 | 0.185   | 0.018   | 8.88E-25  | OR11H1  | 22:16934964  |
| PSORS1C1 | 6:31117075  | 0.213   | 0.0245  | 3.50E-18  | OR11H1  | 22:16892695  |
| PTGR1    | 9:114357659 | -0.192  | 0.0192  | 1.52E-23  | OR1A1   | 17:22249643  |
| PTPN20A  | 10:46590033 | -0.358  | 0.0208  | 2.18E-66  | OR1D2   | 17:22260458  |
| PTPN20B  | 10:48984205 | -0.159  | 0.0221  | 6.27E-13  | OR1D5   | 17:25335635  |
| PTPRCAP  | 11:67205978 | -0.303  | 0.0253  | 4.73E-33  | OR1D5   | 17:25335635  |
| PTPRN2   | 7:158380436 | -0.18   | 0.0253  | 1.12E-12  | OR1D5   | 17:25335635  |
| QRSL1    | 6:107077502 | -0.127  | 0.01    | 5.91E-37  | OR1D5   | 17:25335635  |
| QSOX2    | 9:139098514 | -0.145  | 0.0194  | 7.77E-14  | OR1D5   | 17:25335635  |
| RAB17    | 2:238491258 | 0.189   | 0.0233  | 5.00E-16  | OR2B2   | 6:27954826   |
| RAB27A   | 15:55608051 | 0.246   | 0.0267  | 3.16E-20  | OR2J2   | 6:2970312    |
| RAB6C    | 2:130694072 | 0.145   | 0.0106  | 1.35E-42  | OR2J2   | 6:2970312    |
| RABEP1   | 17:5290703  | -0.0732 | 0.00998 | 2.22E-13  | OR2J2   | 6:2970312    |
| RAC1     | 7:61821560  | 2.61    | 0.293   | 5.20E-19  | OR2T12  | 1:248907328  |
| RAD51C   | 17:56526096 | -0.156  | 0.0182  | 1.02E-17  | OR2T27  | 1:248814415  |
| RAD9A    | 11:66899619 | 0.337   | 0.0405  | 8.72E-17  | OR2T29  | 1:249205928  |
| RADIL    | 7:4809336   | 0.343   | 0.0433  | 2.35E-15  | OR2T5   | 1:249205928  |
| RANBP6   | 9:68400922  | 1.52    | 0.178   | 1.35E-17  | OR3A1   | 17:22246520  |
| RARRES1  | 3:158450417 | 0.139   | 0.014   | 3.13E-23  | OR3A1   | 17:22246520  |
| RARS     | 5:168021502 | -0.0826 | 0.0129  | 1.52E-10  | OR4A47  | 11:48388105  |
| RASGRP3  | 2:33754336  | 0.371   | 0.0419  | 8.41E-19  | OR4A47  | 11:48388105  |
| RAX2     | 19:27878681 | 1.07    | 0.113   | 2.82E-21  | OR4A47  | 11:48388105  |
| RBBP8NL  | 20:60992402 | 0.209   | 0.0147  | 7.12E-46  | OR4A47  | 11:48388105  |
| RBL2     | 16:53523947 | -0.201  | 0.0202  | 2.51E-23  | OR4A47  | 11:48388105  |
| RBPM52   | 15:64828504 | 0.423   | 0.0376  | 2.32E-29  | OR4F15  | 15:102507456 |
| RCBTB1   | 13:50101073 | -0.126  | 0.0173  | 3.26E-13  | OR4F15  | 15:102506525 |
| RCHY1    | 4:76408064  | 0.205   | 0.0178  | 1.09E-30  | OR4F4   | 15:102506525 |

|               |              |         |         |           |        |             |
|---------------|--------------|---------|---------|-----------|--------|-------------|
| RECK          | 9:36070025   | 0.0779  | 0.012   | 8.49E-11  | OR4X2  | 11:48354957 |
| RESP18        | 2:220191861  | -0.573  | 0.0228  | 2.25E-139 | OR51A7 | 11:48351005 |
| REV3L         | 6:111593029  | -0.127  | 0.0154  | 1.63E-16  | OR51A7 | 11:51575314 |
| RFPL3         | 22:32582654  | 0.0807  | 0.00625 | 3.85E-38  | OR51A7 | 11:51575314 |
| RFPL3S        | 22:32786217  | -0.196  | 0.0199  | 6.91E-23  | OR51A7 | 11:51575314 |
| RFWD3         | 16:74548007  | -0.108  | 0.0136  | 2.00E-15  | OR51B4 | 11:48356870 |
| RGPD8         | 2:113114004  | -0.195  | 0.024   | 4.47E-16  | OR51B4 | 11:48356870 |
| RGR           | 10:86004238  | 0.709   | 0.0543  | 5.79E-39  | OR51B4 | 11:48356870 |
| RGS14         | 5:176798040  | -0.31   | 0.0272  | 4.32E-30  | OR51B4 | 11:48356870 |
| RHOD          | 11:66824261  | -0.415  | 0.0412  | 7.29E-24  | OR51B4 | 11:48356870 |
| RIBC2         | 22:45833924  | -0.195  | 0.0114  | 1.36E-65  | OR51I1 | 11:48355553 |
| RIC3          | 11:8129023   | -0.17   | 0.0254  | 2.19E-11  | OR51I1 | 11:48355553 |
| RIIAD1        | 1:151699416  | -0.301  | 0.0381  | 2.78E-15  | OR51I1 | 11:48355553 |
| RIMS2         | 8:105262561  | 0.167   | 0.0166  | 8.28E-24  | OR51I1 | 11:48355553 |
| RLBP1         | 15:89763535  | 0.241   | 0.0325  | 1.21E-13  | OR51I1 | 11:48355553 |
| RMDN1         | 8:87338452   | 0.263   | 0.0205  | 1.12E-37  | OR51I2 | 11:61862695 |
| RMI2          | 16:11439303  | -0.404  | 0.0177  | 2.60E-115 | OR51I2 | 11:61862695 |
| RNASEL        | 1:182567440  | 0.0975  | 0.0122  | 1.33E-15  | OR51I2 | 11:61862695 |
| RNF149        | 2:101922360  | 0.14    | 0.02    | 2.56E-12  | OR51I2 | 11:61862695 |
| RNF166        | 16:88797926  | 0.189   | 0.0292  | 9.63E-11  | OR51I2 | 11:61862695 |
| RNF186        | 1:206514654  | -0.54   | 0.0433  | 1.07E-35  | OR51J1 | 11:56468554 |
| RNF213        | 17:78239532  | 0.144   | 0.022   | 5.93E-11  | OR51J1 | 11:56468403 |
| RNF39         | 6:29859804   | 0.0759  | 0.00485 | 3.35E-55  | OR52B4 | 11:51160886 |
| RNF4          | 4:3597137    | -1.66   | 0.165   | 8.25E-24  | OR52B6 | 11:51578565 |
| RNPEP         | 1:201968263  | -0.132  | 0.0166  | 1.84E-15  | OR52B6 | 11:56470894 |
| RORA          | 15:61468065  | -0.23   | 0.019   | 9.91E-34  | OR52B6 | 11:56470894 |
| RP11-1026M7.1 | 5:177218594  | 0.747   | 0.0255  | 1.23E-188 | OR52B6 | 11:56470716 |
| RP11-166B2.1  | 16:12070422  | -0.198  | 0.0285  | 3.72E-12  | OR52B6 | 11:56472983 |
| RP11-176H8.1  | 14:31910733  | 0.227   | 0.0297  | 2.12E-14  | OR52D1 | 11:48340727 |
| RP11-195B21.3 | 9:67836868   | 0.302   | 0.0409  | 1.54E-13  | OR52D1 | 11:48340727 |
| RP11-298I3.5  | 14:23371964  | -0.28   | 0.0411  | 9.58E-12  | OR52D1 | 11:60813114 |
| RP11-345J4.5  | 16:30321064  | -0.348  | 0.0247  | 4.43E-45  | OR52D1 | 11:60813114 |
| RP11-45M22.4  | 17:17151664  | 0.157   | 0.0243  | 1.04E-10  | OR52E6 | 11:51577359 |
| RP11-507M3.1  | 2:24401315   | -0.0635 | 0.00661 | 7.49E-22  | OR52E6 | 11:51577359 |
| RP11-514P8.6  | 7:102314422  | 0.258   | 0.027   | 1.23E-21  | OR52E6 | 11:51577359 |
| RP11-644F5.1C | 12:56115585  | -0.211  | 0.017   | 2.26E-35  | OR52E6 | 11:51577359 |
| RP11-712L6.5  | 11:126163124 | 0.18    | 0.0244  | 1.62E-13  | OR52E6 | 11:51577359 |
| RP11-826N14.1 | 5:175446487  | -0.312  | 0.0276  | 1.25E-29  | OR52K2 | 11:48385372 |
| RP1-66C13.4   | 17:26206414  | -0.0634 | 0.00933 | 1.08E-11  | OR52K2 | 11:48385372 |

|          |             |         |         |           |               |              |
|----------|-------------|---------|---------|-----------|---------------|--------------|
| RP9      | 7:32953216  | 0.177   | 0.0223  | 2.07E-15  | OR52K2        | 11:48350545  |
| RPA2     | 1:28241083  | 0.458   | 0.0282  | 2.58E-59  | OR52N5        | 11:56470579  |
| RPL11    | 1:248601069 | 0.757   | 0.107   | 1.50E-12  | OR52N5        | 11:48373976  |
| RPL12    | 9:130221698 | 0.137   | 0.019   | 5.57E-13  | OR52N5        | 11:48373976  |
| RPL22L1  | 3:170578721 | -0.197  | 0.0273  | 5.35E-13  | OR52N5        | 11:48373976  |
| RPL36AL  | 14:50095335 | 0.145   | 0.0189  | 1.69E-14  | OR52N5        | 11:48388105  |
| RPL9     | 4:39446549  | -2.16   | 0.048   | <1.0E-314 | OR56A1        | 11:56470865  |
| RPP21    | 6:30230518  | -0.338  | 0.0401  | 3.49E-17  | OR56A1        | 11:56470865  |
| RPRD2    | 1:150374447 | 0.239   | 0.0168  | 6.30E-46  | OR56A1        | 11:56470865  |
| RPS27L   | 15:63441057 | -0.415  | 0.0373  | 9.37E-29  | OR56A1        | 11:56470865  |
| RPS9     | 19:54709377 | -0.131  | 0.0189  | 4.17E-12  | OR56A1        | 11:56470865  |
| RRP1B    | 21:45112939 | -0.0731 | 0.00988 | 1.37E-13  | OR5A1         | 11:58221171  |
| RRP7A    | 22:42942809 | 0.311   | 0.0263  | 2.90E-32  | OR5I1         | 11:55044296  |
| RSPH10B2 | 7:61821630  | -1.91   | 0.199   | 8.15E-22  | OR5I1         | 11:55044296  |
| RSPO4    | 20:1000072  | -0.199  | 0.0197  | 5.44E-24  | OR5I1         | 11:54774691  |
| RTN4     | 2:55204028  | -0.187  | 0.0152  | 8.77E-35  | OR5K1         | 3:9891365    |
| RWDD2B   | 21:30378191 | -0.426  | 0.0203  | 8.95E-98  | OR6S1         | 14:20763161  |
| RWDD3    | 1:95674384  | -0.235  | 0.0364  | 1.07E-10  | OR6V1         | 7:142116439  |
| RXRB     | 6:33088084  | -0.106  | 0.0156  | 1.08E-11  | OR6V1         | 7:142116439  |
| S100A7   | 1:153430249 | -0.171  | 0.0215  | 1.81E-15  | OR6V1         | 7:142116439  |
| SAAL1    | 11:18101078 | -0.131  | 0.0176  | 9.83E-14  | OR6V1         | 7:142116439  |
| SAT2     | 17:7525548  | 0.175   | 0.0173  | 4.71E-24  | OR6V1         | 7:142116439  |
| SCGB3A1  | 5:179997625 | 0.372   | 0.0286  | 1.12E-38  | OR7A10        | 19:15128250  |
| SCIMP    | 17:5126207  | -0.102  | 0.0139  | 2.17E-13  | OR8D1         | 11:123784212 |
| SCLY     | 2:238990388 | -0.0904 | 0.0118  | 1.84E-14  | OR8D1         | 11:123784212 |
| SCN11A   | 3:39073029  | 0.0537  | 0.00759 | 1.49E-12  | ORC6          | 16:46402985  |
| SCN7A    | 2:167331064 | -0.049  | 0.00726 | 1.49E-11  | ORC6          | 16:46465847  |
| SEC14L4  | 22:30879710 | -0.0749 | 0.011   | 9.82E-12  | ORC6          | 16:46402985  |
| SELL     | 1:169637078 | -0.19   | 0.0253  | 5.92E-14  | P2RX3         | 11:56474191  |
| SELM     | 22:31476288 | -0.213  | 0.033   | 1.09E-10  | P2RX5-TAX1BP3 | 17:41382047  |
| SEMA5B   | 3:122642724 | -0.203  | 0.0274  | 1.27E-13  | P2RX5-TAX1BP3 | 17:28843496  |
| SENP2    | 3:185349425 | -0.0699 | 0.0109  | 1.43E-10  | PADI4         | 1:17673102   |
| SEPT1    | 16:30376959 | -0.189  | 0.0208  | 1.02E-19  | PADI4         | 1:17673102   |
| SEPT12   | 16:4846533  | 0.47    | 0.0221  | 2.30E-100 | PADI4         | 1:17673102   |
| SEPT15   | 1:87368095  | 0.0993  | 0.0155  | 1.49E-10  | PADI4         | 1:17673102   |
| SERF1B   | 5:69298177  | 0.352   | 0.0395  | 5.04E-19  | PAOX          | 10:135446144 |
| SERPINC1 | 1:173893805 | 0.0863  | 0.00982 | 1.52E-18  | PCNA          | 20:55294708  |
| SETD4    | 21:37366582 | -0.0956 | 0.0141  | 1.20E-11  | PDZK1IP1      | 1:47392596   |
| SGCA     | 17:48243736 | -0.316  | 0.0165  | 9.40E-82  | PDZK1IP1      | 1:47419215   |

|            |              |          |          |          |          |              |
|------------|--------------|----------|----------|----------|----------|--------------|
| SGK2       | 20:42197892  | 0.464    | 0.0483   | 7.50E-22 | PEX11B   | 1:145247557  |
| SGTB       | 5:64910392   | -0.178   | 0.0251   | 1.33E-12 | PEX11B   | 1:145194076  |
| SH2B2      | 7:101928495  | -0.288   | 0.0255   | 1.40E-29 | PFAS     | 17:80989217  |
| SH3BGR     | 21:40842460  | 0.142    | 0.0206   | 5.45E-12 | PGAM5    | 12:133838700 |
| SHC3       | 9:91628082   | 0.294    | 0.0211   | 3.96E-44 | PHF5A    | 22:42445693  |
| SHISA3     | 4:42412405   | 0.162    | 0.0224   | 4.75E-13 | PI3      | 20:4391341   |
| SHISA4     | 1:201805751  | -0.184   | 0.0171   | 5.30E-27 | PI3      | 20:4391341   |
| SHPK       | 17:3509158   | 0.358    | 0.0201   | 5.81E-71 | PIBF1    | 13:73979274  |
| SIDT1      | 3:113321199  | 0.282    | 0.0326   | 5.14E-18 | PIGX     | 3:197315059  |
| SIGLEC1    | 20:29589323  | -1.49    | 0.185    | 8.01E-16 | PIGX     | 3:197315059  |
| SLC13A3    | 20:45191364  | -0.239   | 0.0255   | 7.08E-21 | PJA2     | 5:10909104   |
| SLC18A1    | 8:20033107   | 0.0195   | 0.003    | 8.03E-11 | PLA2G2A  | 1:206698786  |
| SLC1A7     | 1:53600889   | 0.836    | 0.0526   | 7.03E-57 | PLA2G2A  | 1:206698786  |
| SLC22A18   | 11:2940492   | -0.744   | 0.0536   | 8.30E-44 | PLA2G2A  | 1:207907085  |
| SLC22A18AS | 11:2924850   | -0.267   | 0.0267   | 1.52E-23 | PLEKHB2  | 2:133047399  |
| SLC22A3    | 6:160850273  | 0.113    | 0.0112   | 6.16E-24 | PLEKHB2  | 2:133047399  |
| SLC25A1    | 22:19206499  | -0.273   | 0.0197   | 1.14E-43 | PLEKHS1  | 10:115115136 |
| SLC25A2    | 5:140681648  | 0.0668   | 0.00605  | 2.41E-28 | PNLIP    | 10:118840388 |
| SLC25A24   | 1:108740419  | -0.121   | 0.0145   | 7.13E-17 | PNO1     | 2:67891593   |
| SLC25A34   | 1:16058698   | -0.272   | 0.023    | 2.86E-32 | POLH     | 6:43729267   |
| SLC25A51   | 9:37880134   | 0.196    | 0.0209   | 6.72E-21 | POLR2J   | 7:102114424  |
| SLC26A8    | 6:35976778   | -0.173   | 0.0222   | 6.55E-15 | POLR2J   | 7:102102164  |
| SLC27A6    | 5:128302850  | -0.0466  | 0.00727  | 1.46E-10 | POMC     | 2:25384456   |
| SLC2A14    | 12:8082367   | 0.0948   | 0.00756  | 4.53E-36 | POTEC    | 18:15403165  |
| SLC35A1    | 6:88181046   | -0.209   | 0.0197   | 2.70E-26 | POTEH    | 22:16880695  |
| SLC35G5    | 8:11188532   | -0.152   | 0.017    | 3.85E-19 | POTEM    | 14:19011416  |
| SLC37A3    | 7:140034294  | -0.089   | 0.0125   | 1.08E-12 | POTEM    | 14:19011416  |
| SLC38A8    | 16:84074978  | -0.556   | 0.0305   | 3.01E-74 | POTEM    | 14:19011416  |
| SLC39A10   | 2:196703028  | -0.203   | 0.0251   | 6.08E-16 | POTEM    | 14:19011416  |
| SLC39A2    | 14:21466781  | -0.0808  | 0.00593  | 2.82E-42 | POTEM    | 14:19011416  |
| SLC44A3    | 1:95302957   | -0.327   | 0.0504   | 8.69E-11 | PPA2     | 4:106288220  |
| SLC5A4     | 22:32747715  | 0.238    | 0.0172   | 1.52E-43 | PPA2     | 4:106286465  |
| SLC5A7     | 2:108603628  | -0.00708 | 0.000947 | 7.65E-14 | PPA2     | 4:106288220  |
| SLC7A9     | 19:33366829  | -0.316   | 0.0258   | 1.72E-34 | PPA2     | 4:106286947  |
| SLCO4C1    | 5:101625154  | -0.0413  | 0.00601  | 6.34E-12 | PPIA     | 7:45392654   |
| SLFN5      | 17:33544766  | 0.0898   | 0.00932  | 5.68E-22 | PPP1R9A  | 7:95467086   |
| SLN        | 11:107593050 | -0.267   | 0.0341   | 4.88E-15 | PRAMEF12 | 1:121363032  |
| SLX1B      | 16:30166626  | -0.448   | 0.0404   | 1.42E-28 | PRAMEF26 | 1:12908500   |
| SLX4       | 16:33941694  | -2.29    | 0.239    | 9.56E-22 | PRAMEF26 | 1:12908500   |

|              |              |         |         |           |          |              |
|--------------|--------------|---------|---------|-----------|----------|--------------|
| SMAD9        | 13:37489555  | 0.169   | 0.0254  | 2.86E-11  | PRAMEF26 | 1:12919505   |
| SMARCB1      | 22:24164598  | -0.153  | 0.0195  | 4.29E-15  | PRAMEF26 | 1:12919505   |
| SMC1B        | 22:45833924  | -0.0189 | 0.00217 | 3.05E-18  | PRAMEF6  | 1:121141553  |
| SMC2         | 9:106856910  | -0.171  | 0.0141  | 7.54E-34  | PRH1     | 12:118819493 |
| SMIM22       | 16:4845532   | -0.143  | 0.0137  | 1.66E-25  | PRM1     | 16:10613536  |
| SMOC2        | 6:169016615  | 0.22    | 0.028   | 3.93E-15  | PROL1    | 4:7132371    |
| SNED1        | 2:241979264  | 0.182   | 0.0273  | 2.62E-11  | PRPF18   | 10:135446144 |
| SNUPN        | 15:75750425  | -0.105  | 0.0117  | 2.85E-19  | PRRC2C   | 1:17229951   |
| SNX17        | 2:27648590   | 0.13    | 0.0119  | 8.82E-28  | PRSS1    | 7:142461940  |
| SNX19        | 11:130786592 | -0.201  | 0.0188  | 1.12E-26  | PRSS1    | 7:142461921  |
| SNX31        | 8:101676363  | 0.0882  | 0.0136  | 8.86E-11  | PRSS1    | 7:142461921  |
| SNX32        | 11:65595697  | 0.33    | 0.0351  | 5.37E-21  | PRSS1    | 7:142461910  |
| SNX8         | 7:142116439  | -2.21   | 0.254   | 3.30E-18  | PRSS1    | 7:142461921  |
| SOHLH2       | 13:36799495  | 0.238   | 0.0103  | 3.96E-118 | PRSS33   | 16:33941694  |
| SPAG11B      | 8:8018749    | 0.0224  | 0.00332 | 1.51E-11  | PRSS33   | 16:33941694  |
| SPAG7        | 17:4914028   | 0.189   | 0.0295  | 1.49E-10  | PRSS33   | 16:33941694  |
| SPATA33      | 16:89710378  | -0.149  | 0.0153  | 2.06E-22  | PRSS33   | 16:33941694  |
| SPATA5L1     | 15:45652926  | 0.115   | 0.0179  | 1.32E-10  | PRSS33   | 16:33941694  |
| SPATA7       | 14:88862529  | -0.237  | 0.0213  | 9.30E-29  | PRSS58   | 7:142113650  |
| SPATC1L      | 21:48028060  | -0.734  | 0.0507  | 1.69E-47  | PRSS58   | 7:142113650  |
| SPECC1       | 17:20311541  | 0.126   | 0.0115  | 6.18E-28  | PSMB2    | 1:3577254    |
| SPEF2        | 5:35682606   | 0.178   | 0.0147  | 9.48E-34  | PSMB7    | 9:12739598   |
| SPG21        | 15:65315211  | -0.099  | 0.011   | 2.26E-19  | PSMC2    | 7:102217297  |
| SPINK2       | 4:57692773   | 0.326   | 0.0402  | 5.08E-16  | PSPH     | 7:57093614   |
| SPINK9       | 5:147733045  | 0.136   | 0.0191  | 1.08E-12  | PTX3     | 3:156184172  |
| SPPL3        | 12:121198299 | -0.0941 | 0.00897 | 9.55E-26  | PUM2     | 2:215147863  |
| SPRY1        | 4:124325753  | -0.159  | 0.0215  | 1.41E-13  | PURB     | 7:45392654   |
| SPRYD4       | 12:56863770  | 0.155   | 0.0147  | 5.40E-26  | PURB     | 7:45392654   |
| SPSB2        | 12:6987335   | 0.466   | 0.0208  | 3.61E-111 | QTRTD1   | 3:113652214  |
| SSR1         | 6:7292674    | -0.0962 | 0.0121  | 1.86E-15  | RAB28    | 4:138803729  |
| ST20         | 15:80206511  | -0.179  | 0.0218  | 2.19E-16  | RAB2B    | 14:21981216  |
| ST6GALNAC2   | 17:74574103  | 0.095   | 0.0145  | 5.69E-11  | RAB2B    | 14:21072431  |
| STEAP1B      | 7:22542138   | 0.18    | 0.0269  | 2.21E-11  | RAB33B   | 4:139948061  |
| STMN4        | 8:27103024   | -0.182  | 0.0269  | 1.33E-11  | RAB33B   | 4:139948061  |
| STON1        | 2:48812387   | 0.102   | 0.0121  | 3.46E-17  | RAC1     | 7:61821560   |
| STRA13       | 17:79980756  | 0.184   | 0.0135  | 2.67E-42  | RAC1     | 7:61821560   |
| STRA6        | 15:74493886  | 0.102   | 0.0106  | 6.42E-22  | RAC1     | 7:61821560   |
| STRC         | 15:43995789  | 0.209   | 0.0285  | 2.24E-13  | RAC1     | 7:61821560   |
| STX16-NPEPL1 | 20:57263778  | 0.238   | 0.032   | 1.03E-13  | RAC1     | 7:61821560   |

|         |              |         |         |           |               |             |
|---------|--------------|---------|---------|-----------|---------------|-------------|
| STX18   | 4:4435741    | -0.105  | 0.0163  | 1.18E-10  | RALY          | 20:31877204 |
| STX6    | 1:180950126  | 0.0762  | 0.0102  | 7.98E-14  | RANBP6        | 9:68400922  |
| STXBP6  | 14:25414148  | -0.124  | 0.0193  | 1.32E-10  | RANBP6        | 9:68400922  |
| STYXL1  | 7:75677216   | 0.262   | 0.0337  | 7.58E-15  | RANBP6        | 9:68400922  |
| SULT1A1 | 16:28626741  | -0.208  | 0.0259  | 9.68E-16  | RANBP6        | 9:68400922  |
| SULT1C2 | 2:108913012  | 0.265   | 0.0101  | 9.90E-152 | RANBP6        | 9:68400922  |
| SUMF1   | 3:4403537    | -0.186  | 0.0126  | 2.58E-49  | RANBP9        | 6:145394013 |
| SUPT3H  | 6:44774597   | 0.144   | 0.0137  | 7.69E-26  | RAX           | 18:573269   |
| SUPT4H1 | 17:56447952  | -0.114  | 0.0177  | 1.19E-10  | RAX2          | 19:27851743 |
| SURF1   | 9:136268084  | 0.426   | 0.0235  | 1.93E-73  | RAX2          | 19:27851743 |
| SURF6   | 9:136196161  | -0.215  | 0.0264  | 3.83E-16  | RAX2          | 19:27851743 |
| SUSD1   | 9:114927849  | 0.142   | 0.0189  | 5.77E-14  | RAX2          | 19:27851743 |
| SUSD2   | 22:24435954  | -0.283  | 0.0283  | 1.52E-23  | RAX2          | 19:27851743 |
| SYCE1L  | 16:77233338  | 0.323   | 0.0316  | 1.59E-24  | RBBP8NL       | 20:60996368 |
| SYCE3   | 22:51001271  | 0.859   | 0.0534  | 3.19E-58  | RBBP9         | 20:1917479  |
| TACR3   | 4:104847521  | 0.0209  | 0.00302 | 4.50E-12  | REG4          | 1:121128139 |
| TAF1A   | 1:222731523  | -0.103  | 0.0144  | 8.50E-13  | RELB          | 19:45670248 |
| TAF1C   | 16:84213965  | -0.234  | 0.0168  | 4.25E-44  | RESP18        | 2:220184857 |
| TAP2    | 6:32796480   | 0.27    | 0.0269  | 1.05E-23  | RESP18        | 2:220193396 |
| TAS2R4  | 7:141455077  | 0.159   | 0.0142  | 4.21E-29  | RESP18        | 2:220184857 |
| TAS2R43 | 12:11218634  | -0.017  | 0.00226 | 5.39E-14  | RIBC2         | 22:45830097 |
| TAS2R60 | 7:142172531  | -0.0691 | 0.00969 | 9.96E-13  | RIMS2         | 8:105215989 |
| TBC1D24 | 16:33941694  | -1.64   | 0.226   | 3.97E-13  | RMI2          | 16:11439303 |
| TBC1D26 | 17:15618623  | 0.244   | 0.0235  | 2.96E-25  | RMI2          | 16:11439303 |
| TBC1D3  | 17:36412149  | -0.424  | 0.043   | 6.18E-23  | RMND1         | 6:151694262 |
| TBC1D3C | 17:34732888  | 0.905   | 0.0643  | 5.44E-45  | RNASE12       | 14:21981216 |
| TBC1D3F | 17:36350337  | 1.65    | 0.188   | 1.68E-18  | RNASE12       | 14:21981216 |
| TBC1D3H | 17:34732888  | 0.52    | 0.0429  | 8.15E-34  | RNF125        | 18:29789212 |
| TBC1D9B | 5:179334857  | 0.182   | 0.0182  | 1.52E-23  | RNF186        | 1:206514654 |
| TBX5    | 12:114699538 | 0.0516  | 0.00775 | 2.77E-11  | RNF186        | 1:206514654 |
| TBX6    | 16:30078492  | 0.139   | 0.0198  | 2.22E-12  | RNF186        | 1:206514654 |
| TC2N    | 14:92286857  | -0.146  | 0.01    | 2.81E-48  | RNF39         | 6:29864630  |
| TCEA3   | 1:23751140   | 0.294   | 0.0232  | 8.41E-37  | RNF4          | 4:3597137   |
| TCEB2   | 16:2821988   | -0.342  | 0.0229  | 1.97E-50  | RNF4          | 4:3597137   |
| TCF19   | 6:31223601   | 0.215   | 0.025   | 7.97E-18  | RNF4          | 4:3597137   |
| TCFL5   | 20:61500478  | -0.139  | 0.0202  | 5.94E-12  | RNF4          | 4:3597137   |
| TDGF1   | 3:46619238   | 0.368   | 0.0226  | 1.30E-59  | RNF4          | 4:3597137   |
| TDO2    | 4:156752651  | -0.208  | 0.0287  | 4.25E-13  | RNF6          | 13:26551751 |
| TDRD5   | 1:179560718  | 0.182   | 0.0125  | 5.05E-48  | RP11-1026M7.2 | 5:177221743 |



|           |              |         |         |           |                |              |
|-----------|--------------|---------|---------|-----------|----------------|--------------|
| TDRD6     | 6:46624656   | -0.145  | 0.0121  | 4.34E-33  | RP11-1026M7.2  | 5:177221743  |
| TECPR1    | 7:97849648   | 0.138   | 0.0181  | 2.45E-14  | RP11-1099M24.7 | 17:78603090  |
| TECTB     | 10:113984760 | 0.0682  | 0.00868 | 3.93E-15  | RP11-1099M24.7 | 17:78603090  |
| TEN1      | 17:74015354  | 0.172   | 0.0232  | 1.23E-13  | RP11-169F17.1  | 18:69918736  |
| TESK2     | 1:45826272   | 0.16    | 0.0197  | 4.59E-16  | RP11-196G11.1  | 16:31670496  |
| TEX29     | 13:111980150 | 0.526   | 0.0356  | 2.11E-49  | RP11-196G11.1  | 16:31670496  |
| TEX40     | 11:64048912  | 0.403   | 0.0352  | 2.38E-30  | RP11-196G11.1  | 16:31203669  |
| TFB1M     | 6:155635637  | -0.111  | 0.0134  | 1.20E-16  | RP11-297N6.4   | 8:12452575   |
| TGM1      | 14:24734645  | 0.204   | 0.025   | 3.35E-16  | RP11-318A15.7  | 17:74926652  |
| TGM3      | 20:2217291   | 0.0403  | 0.00606 | 2.93E-11  | RP11-318A15.7  | 17:74586504  |
| THEM4     | 1:151920862  | -0.125  | 0.0166  | 5.07E-14  | RP11-385D13.1  | 17:15588     |
| THG1L     | 5:157156103  | 0.11    | 0.0123  | 3.78E-19  | RP11-529K1.3   | 16:70001611  |
| THNSL2    | 2:88469863   | 0.959   | 0.0436  | 3.19E-107 | RP11-536G4.1   | 12:97166022  |
| THOC3     | 5:175389016  | -0.493  | 0.0353  | 2.51E-44  | RP11-644F5.10  | 12:56115585  |
| TIMM10    | 11:57283988  | -0.314  | 0.0187  | 2.82E-63  | RP11-664I21.6  | 11:124737216 |
| TIMM21    | 18:71718499  | -0.21   | 0.0205  | 1.26E-24  | RP11-664I21.6  | 11:12400992  |
| TIPIN     | 15:66744369  | 0.319   | 0.0311  | 1.10E-24  | RP11-738G5.2   | 8:49889797   |
| TIPRL     | 1:168166616  | -0.152  | 0.0129  | 4.78E-32  | RP11-826N14.2  | 5:175446487  |
| TIRAP     | 11:126151761 | -0.14   | 0.0179  | 5.23E-15  | RP11-977G19.10 | 12:56952013  |
| TMC2      | 20:25904151  | -1.11   | 0.113   | 8.96E-23  | RP11-998D10.1  | 14:22483999  |
| TMEM11    | 17:21526192  | 1.63    | 0.22    | 1.27E-13  | RPAIN          | 17:45384410  |
| TMEM121   | 14:105993258 | -0.144  | 0.0218  | 3.96E-11  | RPGRIP1L       | 16:54239414  |
| TMEM126A  | 11:85347415  | -0.125  | 0.0189  | 3.75E-11  | RPGRIP1L       | 16:54604728  |
| TMEM132E  | 17:32887254  | -0.167  | 0.0222  | 5.37E-14  | RPL11          | 1:248601069  |
| TMEM156   | 4:39025844   | 0.126   | 0.018   | 2.56E-12  | RPL11          | 1:235844     |
| TMEM17    | 2:62731754   | -0.148  | 0.0203  | 3.08E-13  | RPL22          | 1:5735297    |
| TMEM171   | 5:72412602   | 0.185   | 0.0134  | 2.35E-43  | RPL26          | 17:75535140  |
| TMEM200B  | 1:29414108   | -0.148  | 0.0176  | 4.13E-17  | RPL26          | 17:80989217  |
| TMEM213   | 7:138029183  | -0.0379 | 0.0056  | 1.31E-11  | RPL27          | 17:41382047  |
| TMEM215   | 9:32904965   | 0.125   | 0.00937 | 1.35E-40  | RPL27A         | 11:94860472  |
| TMEM236   | 10:17812604  | 0.012   | 0.00177 | 1.20E-11  | RPL27A         | 11:77155274  |
| TMEM244   | 6:130157007  | -0.0829 | 0.00871 | 1.77E-21  | RPL32          | 3:125567571  |
| TMEM245   | 9:111772918  | -0.111  | 0.0119  | 1.08E-20  | RPL32          | 3:129058118  |
| TMEM255B  | 13:114502416 | 0.199   | 0.023   | 5.05E-18  | RPL9           | 4:39446549   |
| TMOD3     | 15:52189201  | -0.218  | 0.015   | 7.45E-48  | RPL9           | 4:39446549   |
| TMPRSS5   | 11:113582504 | 0.628   | 0.0356  | 1.20E-69  | RPL9           | 4:39455378   |
| TMPRSS7   | 3:111731195  | -0.0227 | 0.00321 | 1.53E-12  | RPRD2          | 1:149582977  |
| TMPRSS9   | 19:23936403  | -1.4    | 0.0919  | 2.10E-52  | RPS18          | 6:32485527   |
| TNFRSF10C | 8:22941873   | 0.286   | 0.0228  | 4.30E-36  | RPS27L         | 15:63441057  |

|           |              |         |         |          |          |             |
|-----------|--------------|---------|---------|----------|----------|-------------|
| TNFRSF13C | 22:42338152  | 0.114   | 0.0162  | 1.96E-12 | RSPH10B2 | 7:61821630  |
| TNN       | 1:175062557  | 0.0286  | 0.00288 | 3.07E-23 | RSPH10B2 | 7:61821630  |
| TNNI3     | 19:55681833  | 0.391   | 0.0335  | 1.78E-31 | RSPH10B2 | 7:61821630  |
| TNPO3     | 7:128595149  | -0.091  | 0.0131  | 3.74E-12 | RSPH10B2 | 7:61821630  |
| TOM1L1    | 17:53009971  | -0.138  | 0.0171  | 7.02E-16 | RSPH10B2 | 7:61821630  |
| TOMM40    | 19:45398264  | -0.12   | 0.0169  | 1.24E-12 | RTFDC1   | 20:55514750 |
| TOMM7     | 7:22861038   | -0.167  | 0.0164  | 2.36E-24 | RUNDC1   | 17:41382433 |
| TOP3B     | 22:22290670  | -0.226  | 0.0265  | 1.49E-17 | RWDD2B   | 21:30400110 |
| TP53TG3   | 16:33395983  | -0.118  | 0.0181  | 7.06E-11 | RWDD2B   | 21:30378191 |
| TP53TG3D  | 16:32411542  | -0.179  | 0.0248  | 5.29E-13 | SAA1     | 11:18141982 |
| TPTE2     | 13:19947076  | 0.0812  | 0.00915 | 7.04E-19 | SAA1     | 11:18141982 |
| TRAM2     | 6:52245945   | -0.0707 | 0.0105  | 1.66E-11 | SAA2     | 11:1902983  |
| TRAPPC4   | 11:118893878 | 0.163   | 0.0148  | 3.29E-28 | SAA2     | 11:1902983  |
| TREML4    | 6:41196104   | -0.0206 | 0.0022  | 7.70E-21 | SAA2     | 11:19218770 |
| TREX1     | 3:48508585   | -0.313  | 0.0263  | 1.17E-32 | SAA4     | 11:1902983  |
| TRIM35    | 8:27167942   | -0.0818 | 0.0124  | 4.20E-11 | SAA4     | 11:1902983  |
| TRIM43    | 2:96603973   | -0.0589 | 0.00775 | 2.96E-14 | SAFB     | 19:52486363 |
| TRIM49B   | 11:48363026  | -0.139  | 0.0114  | 3.39E-34 | SAFB     | 19:55683246 |
| TRIM58    | 1:248011866  | 0.138   | 0.0171  | 7.02E-16 | SCGB1C1  | 11:1017968  |
| TRIM63    | 1:26580790   | 0.124   | 0.0129  | 7.09E-22 | SCGB3A1  | 5:179997625 |
| TRIM69    | 15:45021766  | -0.213  | 0.0286  | 9.51E-14 | SCNN1A   | 12:69986    |
| TRIML1    | 4:189058364  | 0.0477  | 0.00381 | 5.83E-36 | SCNN1A   | 12:73752709 |
| TRMT5     | 14:61579863  | -0.0593 | 0.00905 | 5.66E-11 | SENP5    | 3:197315059 |
| TRPM1     | 15:31394868  | -0.127  | 0.00879 | 2.57E-47 | SENP5    | 3:197387516 |
| TRPV2     | 17:16318932  | -0.446  | 0.0283  | 5.89E-56 | SEPT12   | 16:4847524  |
| TRPV3     | 17:3447317   | 0.125   | 0.018   | 3.80E-12 | SEPT12   | 16:4846533  |
| TSPAN11   | 12:31049763  | 0.518   | 0.0328  | 3.49E-56 | SETD6    | 16:58525490 |
| TSTD1     | 1:161008535  | 0.255   | 0.0367  | 3.70E-12 | SETD6    | 16:58515425 |
| TTC21B    | 2:166714095  | -0.154  | 0.0168  | 4.88E-20 | SF3B14   | 2:241659876 |
| TTC32     | 2:20090677   | 0.433   | 0.0383  | 1.23E-29 | SF3B14   | 2:241659876 |
| TTC5      | 14:20767618  | -0.228  | 0.0163  | 1.85E-44 | SF3B4    | 1:149582977 |
| TTI1      | 20:36628578  | -0.0755 | 0.0114  | 3.52E-11 | SF3B4    | 1:149582977 |
| TTLL6     | 17:47045862  | 0.123   | 0.0164  | 6.38E-14 | SF3B5    | 6:145416470 |
| TUBA3D    | 2:132234986  | -0.255  | 0.0345  | 1.45E-13 | SF3B5    | 6:145416470 |
| TVP23C    | 17:15406661  | -0.239  | 0.0259  | 2.76E-20 | SGCA     | 17:48243736 |
| TYW5      | 2:200850402  | 0.0691  | 0.00986 | 2.42E-12 | SGCA     | 17:48243736 |
| UBALD2    | 17:74273165  | -0.24   | 0.0228  | 6.53E-26 | SHC3     | 9:91628082  |
| UBE2R2    | 9:33914412   | -0.123  | 0.0149  | 1.52E-16 | SHPK     | 17:3514598  |
| UBOX5     | 20:25904151  | -1.02   | 0.145   | 2.00E-12 | SHPK     | 17:3509158  |

|               |              |         |         |           |          |             |
|---------------|--------------|---------|---------|-----------|----------|-------------|
| UBQLN3        | 11:48346090  | -0.104  | 0.015   | 4.11E-12  | SI       | 3:16435640  |
| UFSP2         | 4:186347055  | 0.136   | 0.0141  | 5.14E-22  | SI       | 3:163950899 |
| UGT2B17       | 4:69534622   | 0.0299  | 0.00338 | 9.06E-19  | SI       | 3:16435640  |
| UGT2B4        | 4:70249082   | -0.096  | 0.0135  | 1.15E-12  | SIGLEC1  | 20:29439122 |
| UHRF1BP1      | 6:34745703   | 0.0867  | 0.00843 | 8.26E-25  | SIGLEC1  | 20:29612969 |
| ULBP2         | 6:150183737  | 0.114   | 0.0152  | 6.38E-14  | SIGLEC1  | 20:29611972 |
| ULK4          | 3:41971728   | 0.239   | 0.0223  | 8.43E-27  | SIGLEC1  | 20:29637426 |
| UPK1A         | 19:36177001  | 0.126   | 0.012   | 8.64E-26  | SKI      | 1:145247557 |
| UPK3B         | 7:76124685   | 0.289   | 0.0161  | 4.77E-72  | SLC15A5  | 12:16903899 |
| UPK3BL        | 7:102319015  | 0.767   | 0.0731  | 9.35E-26  | SLC1A1   | 9:44898183  |
| URB1          | 21:33681770  | 0.127   | 0.0165  | 1.39E-14  | SLC1A1   | 9:44898183  |
| USP22         | 17:21526192  | -1.44   | 0.181   | 1.78E-15  | SLC1A1   | 9:44898183  |
| USP6          | 17:4980987   | 0.179   | 0.0134  | 1.06E-40  | SLC1A1   | 9:44898183  |
| UST           | 6:149239806  | 0.162   | 0.0197  | 1.98E-16  | SLC1A7   | 1:53600889  |
| UTP15         | 5:72862984   | -0.0987 | 0.0152  | 8.39E-11  | SLC22A10 | 11:62226112 |
| UTP18         | 17:49340101  | 0.0788  | 0.0114  | 4.77E-12  | SLC23A2  | 20:51909434 |
| VCPKMT        | 14:50540085  | -0.13   | 0.02    | 8.03E-11  | SLC27A6  | 5:129134418 |
| VILL          | 3:38036807   | -0.458  | 0.0304  | 2.72E-51  | SLC28A2  | 15:46058456 |
| VN1R1         | 19:57993074  | -0.274  | 0.0167  | 1.70E-60  | SLC28A2  | 15:46058456 |
| VPREB3        | 22:24102408  | 0.446   | 0.0439  | 3.01E-24  | SLC30A6  | 2:31540296  |
| VWA5B2        | 3:183976694  | -0.22   | 0.032   | 6.20E-12  | SLC38A8  | 16:84074978 |
| VWDE          | 7:12406186   | 0.157   | 0.0118  | 2.16E-40  | SLX4     | 16:33941694 |
| WARS2         | 1:119577837  | -0.0902 | 0.0107  | 3.46E-17  | SLX4     | 16:33991563 |
| WBP2NL        | 22:42402399  | -0.136  | 0.0199  | 8.25E-12  | SLX4     | 16:33941694 |
| WBSCR27       | 7:73246461   | -0.537  | 0.0245  | 1.74E-106 | SLX4     | 16:33941694 |
| WDR27         | 6:170073543  | -0.191  | 0.0165  | 5.47E-31  | SLX4     | 16:33941694 |
| WDR48         | 3:39125293   | -0.0778 | 0.012   | 8.97E-11  | SMARCD3  | 7:15082341  |
| WDR52         | 3:113262057  | -0.118  | 0.0168  | 2.16E-12  | SMIM20   | 4:2524559   |
| WDR60         | 7:158676289  | -0.337  | 0.0253  | 1.77E-40  | SMU1     | 9:33383540  |
| WDR88         | 19:33635043  | 0.0898  | 0.0124  | 4.42E-13  | SNRPD3   | 22:25056098 |
| WDR96         | 10:105933138 | 0.116   | 0.0165  | 2.06E-12  | SNRPD3   | 22:25056128 |
| WDSUB1        | 2:160144140  | -0.131  | 0.0203  | 1.10E-10  | SNRPD3   | 22:25056128 |
| WDYHV1        | 8:124446796  | -0.148  | 0.0162  | 6.49E-20  | SNRPE    | 1:204092502 |
| WFDC3         | 20:44402115  | 0.436   | 0.0209  | 1.20E-96  | SNX24    | 5:122109100 |
| WI2-3308P17.1 | 1:120576209  | -0.185  | 0.0114  | 3.19E-59  | SNX8     | 7:142116439 |
| WIPI1         | 17:66441651  | -0.219  | 0.025   | 1.95E-18  | SNX8     | 7:142116439 |
| WNT3          | 17:44908263  | -1.49   | 0.0306  | <1.0E-314 | SNX8     | 7:142116439 |
| WT1           | 11:32502239  | 0.0985  | 0.00832 | 2.46E-32  | SNX8     | 7:142116439 |
| WVOX          | 16:78124987  | -0.133  | 0.0166  | 1.13E-15  | SNX8     | 7:142116439 |

|          |              |         |         |           |           |              |
|----------|--------------|---------|---------|-----------|-----------|--------------|
| XKR3     | 22:17235076  | -0.0803 | 0.0113  | 1.19E-12  | SOHLH2    | 13:36792650  |
| XKR9     | 8:71677839   | 0.13    | 0.0128  | 3.11E-24  | SPAG11B   | 8:7913884    |
| XRCC2    | 7:152104360  | 2.12    | 0.13    | 8.70E-60  | SPAG11B   | 8:7370143    |
| XRCC6BP1 | 12:58337132  | -0.225  | 0.0166  | 7.48E-42  | SPAG11B   | 8:8018749    |
| XRRA1    | 11:74618865  | 0.687   | 0.0215  | 4.83E-224 | SPAG11B   | 8:8018749    |
| YBEY     | 21:47726332  | -0.461  | 0.0294  | 2.06E-55  | SPATA2L   | 16:90158184  |
| YBX2     | 17:7193255   | -0.13   | 0.0199  | 6.46E-11  | SPATA31A1 | 9:39377268   |
| YEATS4   | 12:69658161  | 0.341   | 0.0353  | 4.46E-22  | SPATA31A2 | 9:39944249   |
| YWHAB    | 20:43534903  | -0.254  | 0.022   | 7.78E-31  | SPATA31A5 | 9:41915956   |
| ZADH2    | 18:72912469  | -0.107  | 0.0115  | 1.35E-20  | SPCS3     | 4:178212874  |
| ZAP70    | 2:98277804   | -0.14   | 0.0153  | 5.68E-20  | SPCS3     | 4:17740708   |
| ZBED6CL  | 7:150033882  | -0.0908 | 0.01    | 1.09E-19  | SPEF2     | 5:35647998   |
| ZDHHC17  | 12:77230119  | -0.126  | 0.0119  | 3.38E-26  | SPHAR     | 1:228842933  |
| ZDHHC4   | 7:61821560   | 1.38    | 0.208   | 3.25E-11  | SPIRE2    | 16:90158184  |
| ZFP57    | 6:29643877   | 0.103   | 0.00478 | 5.51E-103 | SPIRE2    | 16:90158184  |
| ZFP69    | 1:41026035   | -0.135  | 0.0132  | 1.50E-24  | SPIRE2    | 16:90158184  |
| ZFP82    | 19:36853523  | -0.129  | 0.0111  | 3.20E-31  | SPRR2F    | 1:15375046   |
| ZMAT3    | 3:178758174  | -0.293  | 0.0244  | 3.22E-33  | SPSB2     | 12:6987335   |
| ZMYND12  | 1:42932991   | -0.186  | 0.0269  | 4.70E-12  | SPSB2     | 12:6987981   |
| ZNF12    | 7:61821560   | -1.91   | 0.147   | 1.34E-38  | SRCAP     | 16:29961344  |
| ZNF148   | 3:125076251  | -0.134  | 0.0188  | 1.02E-12  | SRFBP1    | 5:120768765  |
| ZNF155   | 19:44488352  | -0.199  | 0.0245  | 4.57E-16  | SRP14     | 15:40446718  |
| ZNF180   | 19:44995037  | -0.0965 | 0.0126  | 1.88E-14  | STARD3NL  | 7:37881065   |
| ZNF200   | 16:33941694  | -2      | 0.17    | 5.93E-32  | STX2      | 12:130689914 |
| ZNF202   | 11:123610548 | -0.0801 | 0.0117  | 7.59E-12  | SULT1C2   | 2:108904340  |
| ZNF232   | 17:5154016   | 0.331   | 0.0259  | 2.12E-37  | SULT1C2   | 2:108904340  |
| ZNF253   | 19:19995472  | -0.169  | 0.0231  | 2.55E-13  | SUMO2     | 17:7264899   |
| ZNF263   | 16:33941694  | -2.14   | 0.203   | 5.54E-26  | SURF1     | 9:136212369  |
| ZNF268   | 12:133729259 | 0.199   | 0.0176  | 1.21E-29  | SURF1     | 9:136218590  |
| ZNF276   | 16:89802965  | 0.119   | 0.0157  | 3.47E-14  | SYNRG     | 17:36306936  |
| ZNF286A  | 17:15594107  | 0.118   | 0.0152  | 8.28E-15  | TADA2A    | 17:36306936  |
| ZNF354C  | 5:178504338  | -0.0714 | 0.0103  | 4.15E-12  | TAF1C     | 16:84215314  |
| ZNF391   | 6:27353197   | 0.124   | 0.0159  | 6.25E-15  | TAF8      | 6:421206     |
| ZNF404   | 19:44371210  | -0.273  | 0.0206  | 4.37E-40  | TAOK2     | 16:29086987  |
| ZNF439   | 19:11977572  | -0.124  | 0.0153  | 5.29E-16  | TAS2R41   | 7:142460203  |
| ZNF467   | 7:149472112  | -0.323  | 0.0297  | 1.51E-27  | TAS2R41   | 7:142460216  |
| ZNF471   | 19:57042178  | -0.117  | 0.017   | 5.89E-12  | TAS2R41   | 7:142460203  |
| ZNF500   | 16:46402985  | 1.2     | 0.173   | 4.02E-12  | TAS2R60   | 7:142143328  |
| ZNF501   | 3:44883971   | 0.177   | 0.0196  | 1.71E-19  | TAS2R60   | 7:142172531  |

|         |              |         |        |           |          |             |
|---------|--------------|---------|--------|-----------|----------|-------------|
| ZNF502  | 3:44762830   | 0.2     | 0.0159 | 2.77E-36  | TAS2R60  | 7:142172531 |
| ZNF514  | 2:95901265   | 0.183   | 0.0199 | 3.72E-20  | TAS2R60  | 7:142172531 |
| ZNF534  | 19:52928725  | 0.437   | 0.0335 | 6.81E-39  | TAS2R60  | 7:142172531 |
| ZNF577  | 19:52358593  | -0.366  | 0.0222 | 4.59E-61  | TBC1D15  | 12:73304072 |
| ZNF580  | 19:56211995  | 0.248   | 0.0255 | 2.35E-22  | TBC1D20  | 20:142909   |
| ZNF593  | 1:26497340   | -0.289  | 0.0213 | 6.19E-42  | TBC1D20  | 20:10945743 |
| ZNF660  | 3:44651120   | -0.121  | 0.0158 | 1.89E-14  | TBC1D24  | 16:33941694 |
| ZNF670  | 1:247192182  | -0.0949 | 0.0104 | 7.17E-20  | TBC1D24  | 16:33941694 |
| ZNF717  | 3:75270860   | 1.46    | 0.186  | 4.18E-15  | TBC1D24  | 16:33941694 |
| ZNF786  | 7:148799125  | 0.223   | 0.0155 | 6.24E-47  | TBC1D24  | 16:33991563 |
| ZNF787  | 19:56606584  | -0.188  | 0.0234 | 9.42E-16  | TBC1D24  | 16:33991563 |
| ZNF839  | 14:102902709 | -0.15   | 0.0171 | 1.76E-18  | TBC1D3C  | 17:34732888 |
| ZNHIT6  | 1:86253805   | -0.0901 | 0.0115 | 4.70E-15  | TBC1D9B  | 5:179352982 |
| ZNRD1   | 6:29872510   | 0.289   | 0.0356 | 4.74E-16  | TCEB2    | 16:2821988  |
| ZP3     | 7:76303260   | 1.59    | 0.066  | 3.11E-128 | TCL1A    | 14:95313195 |
| ZSCAN31 | 6:28193786   | 0.374   | 0.0288 | 1.47E-38  | TCL1A    | 14:96355146 |
| ZSWIM7  | 17:15879910  | -0.442  | 0.0147 | 1.27E-198 | TCN1     | 11:60114141 |
| ZXDC    | 3:126179492  | 0.146   | 0.0158 | 2.45E-20  | TFF1     | 21:44199048 |
|         |              |         |        |           | THNSL2   | 2:88469863  |
|         |              |         |        |           | THNSL2   | 2:88469863  |
|         |              |         |        |           | THOC3    | 5:175386586 |
|         |              |         |        |           | THRAP3   | 1:3577254   |
|         |              |         |        |           | TIMM10   | 11:57283988 |
|         |              |         |        |           | TIMM10B  | 11:64831013 |
|         |              |         |        |           | TM4SF4   | 3:15004731  |
|         |              |         |        |           | TMC2     | 20:26109209 |
|         |              |         |        |           | TMC2     | 20:26109209 |
|         |              |         |        |           | TMC2     | 20:26109209 |
|         |              |         |        |           | TMC2     | 20:26109209 |
|         |              |         |        |           | TMC2     | 20:26109209 |
|         |              |         |        |           | TMED4    | 7:45392654  |
|         |              |         |        |           | TMED4    | 7:45392654  |
|         |              |         |        |           | TMEM105  | 17:78340119 |
|         |              |         |        |           | TMEM11   | 17:21526192 |
|         |              |         |        |           | TMEM11   | 17:21526192 |
|         |              |         |        |           | TMEM11   | 17:21526192 |
|         |              |         |        |           | TMEM11   | 17:21526192 |
|         |              |         |        |           | TMEM11   | 17:21526192 |
|         |              |         |        |           | TMEM126B | 11:85577403 |

|          |              |
|----------|--------------|
| TMEM184C | 4:149032159  |
| TMEM184C | 4:149003618  |
| TMEM213  | 7:138029144  |
| TMEM213  | 7:138029183  |
| TMEM213  | 7:138029261  |
| TMEM213  | 7:138029261  |
| TMEM230  | 20:52788792  |
| TMEM230  | 20:54638409  |
| TMEM82   | 1:17007206   |
| TMOD3    | 15:52252799  |
| TMOD3    | 15:52252799  |
| TMPRSS15 | 21:18951008  |
| TMPRSS15 | 21:18951008  |
| TMPRSS4  | 11:117368158 |
| TMPRSS5  | 11:113582504 |
| TMPRSS9  | 19:23936403  |
| TMPRSS9  | 19:23936403  |
| TMPRSS9  | 19:23936403  |
| TMPRSS9  | 19:23936403  |
| TMPRSS9  | 19:23936403  |
| TNF      | 6:32440603   |
| TNFAIP2  | 14:102639116 |
| TNFAIP6  | 2:152640075  |
| TNFRSF9  | 1:89457587   |
| TNIP1    | 5:149501688  |
| TNIP3    | 4:12264899   |
| TNN      | 1:175062557  |
| TNRC18   | 7:57613015   |
| TNRC18   | 7:57613015   |
| TOMM6    | 6:421206     |
| TOMM6    | 6:412236     |
| TOP2B    | 3:24995765   |
| TOP2B    | 3:24995765   |
| TPST2    | 22:27773148  |
| TREML4   | 6:40921531   |
| TRIM43   | 2:96613853   |
| TRIM49B  | 11:48363026  |
| TRIM49B  | 11:48363026  |
| TRIM49B  | 11:48363026  |

|         |             |
|---------|-------------|
| TRIM49B | 11:48379997 |
| TRIM49B | 11:49817445 |
| TRIM72  | 16:31203669 |
| TRIM72  | 16:30943214 |
| TRIML1  | 4:189065574 |
| TRIML1  | 4:189058364 |
| TRMT10B | 9:38568     |
| TRPM1   | 15:31394868 |
| TRPV2   | 17:16318932 |
| TSPAN11 | 12:31049763 |
| TSPAN3  | 15:77310726 |
| TTC26   | 7:138604993 |
| TUFM    | 16:29086987 |
| TXNDC15 | 5:135053175 |
| TXNDC15 | 5:134643060 |
| UBD     | 6:2870553   |
| UBD     | 6:28894987  |
| UBQLN3  | 11:48346090 |
| UBQLN3  | 11:48346090 |
| UBQLN3  | 11:48346090 |
| UBQLN3  | 11:48346090 |
| UBQLN3  | 11:48346090 |
| UBQLN3  | 11:48346090 |
| UBXN2A  | 2:235239010 |
| UBXN2A  | 2:237950969 |
| UGT2B11 | 4:70246843  |
| UGT2B11 | 4:70246843  |
| UGT2B4  | 4:70249082  |
| UGT2B4  | 4:70249082  |
| UGT2B4  | 4:70249082  |
| UGT2B4  | 4:70249082  |
| UGT2B4  | 4:70249082  |
| UGT2B4  | 4:70249082  |
| UPK3B   | 7:76127071  |
| UPK3B   | 7:76129758  |
| USH2A   | 1:216910011 |
| USP22   | 17:21526192 |
| USP22   | 17:21526192 |
| USP22   | 17:21526192 |
| USP22   | 17:21526192 |
| USP22   | 17:21526192 |

|               |             |
|---------------|-------------|
| USP41         | 22:21483262 |
| UTP11L        | 1:39284122  |
| VILL          | 3:38038329  |
| VILL          | 3:38044143  |
| VMAC          | 19:55325816 |
| VMAC          | 19:55683246 |
| VN1R1         | 19:57999713 |
| VN1R1         | 19:58060538 |
| VPS35         | 16:46402985 |
| VWDE          | 7:12386207  |
| WDR45B        | 17:80989217 |
| WDR45B        | 17:80989217 |
| WDR60         | 7:158674521 |
| WFDC12        | 20:44056352 |
| WFDC12        | 20:44729409 |
| WFDC3         | 20:44438974 |
| WFDC3         | 20:44413410 |
| WHAMM         | 15:82996209 |
| WI2-3308P17.2 | 1:120576209 |
| WI2-3308P17.2 | 1:120576209 |
| WI2-3308P17.2 | 1:120576209 |
| WI2-3308P17.2 | 1:120576209 |
| WI2-3308P17.2 | 1:120576209 |
| WNT1          | 12:49470128 |
| WNT3          | 17:44908263 |
| WNT3          | 17:44908263 |
| WNT3          | 17:44908263 |
| WNT3          | 17:44908263 |
| XCL2          | 1:16914503  |
| XKR3          | 22:16854249 |
| XKR3          | 22:17235076 |
| XKR3          | 22:17235076 |
| XKR3          | 22:17235076 |
| XKR3          | 22:17235076 |
| XKR9          | 8:7066735   |
| XRCC2         | 7:152104360 |
| XRCC2         | 7:152104360 |
| XRCC2         | 7:152104360 |
| XRCC2         | 7:152104360 |
| XRCC2         | 7:152104360 |



|          |             |
|----------|-------------|
| XRCC5    | 2:217092097 |
| XRR1     | 11:74618865 |
| XRR1     | 11:74618865 |
| XRR1     | 11:74618865 |
| YBEY     | 21:47622981 |
| ZC3HAV1L | 7:139713109 |
| ZC3HAV1L | 7:138899843 |
| ZDHHC4   | 7:61821560  |
| ZDHHC4   | 7:61821630  |
| ZDHHC4   | 7:61821630  |
| ZDHHC4   | 7:61821630  |
| ZFAND6   | 15:81387204 |
| ZFP30    | 19:3861116  |
| ZFP57    | 6:29642978  |
| ZFYVE20  | 3:141720388 |
| ZMYM4    | 1:3577254   |
| ZNF101   | 19:19096834 |
| ZNF101   | 19:19714991 |
| ZNF12    | 7:61821560  |
| ZNF12    | 7:61821560  |
| ZNF12    | 7:61821560  |
| ZNF12    | 7:61821560  |
| ZNF12    | 7:61821560  |
| ZNF200   | 16:33941694 |
| ZNF200   | 16:33991563 |
| ZNF200   | 16:33941694 |
| ZNF200   | 16:33941694 |
| ZNF200   | 16:33941694 |
| ZNF212   | 7:148086823 |
| ZNF253   | 19:19714991 |
| ZNF263   | 16:33991563 |
| ZNF263   | 16:33941694 |
| ZNF263   | 16:33941694 |
| ZNF263   | 16:33941694 |
| ZNF263   | 16:33941694 |
| ZNF282   | 7:148086823 |
| ZNF282   | 7:148645341 |
| ZNF346   | 5:177157240 |
| ZNF346   | 5:177239304 |

|        |             |
|--------|-------------|
| ZNF383 | 19:3861116  |
| ZNF492 | 19:23818728 |
| ZNF492 | 19:23649063 |
| ZNF500 | 16:46402985 |
| ZNF500 | 16:46402985 |
| ZNF500 | 16:46402985 |
| ZNF527 | 19:3861116  |
| ZNF529 | 19:36635239 |
| ZNF529 | 19:36170821 |
| ZNF534 | 19:52925539 |
| ZNF554 | 19:24533045 |
| ZNF554 | 19:27866520 |
| ZNF554 | 19:27866520 |
| ZNF555 | 19:27866520 |
| ZNF555 | 19:24531262 |
| ZNF566 | 19:36635239 |
| ZNF577 | 19:52352006 |
| ZNF681 | 19:24533491 |
| ZNF70  | 22:25056098 |
| ZNF70  | 22:25056098 |
| ZNF70  | 22:25056098 |
| ZNF709 | 19:119541   |
| ZNF717 | 3:75270860  |
| ZNF717 | 3:75270860  |
| ZNF717 | 3:75270860  |
| ZNF717 | 3:75270860  |
| ZNF717 | 3:75270860  |
| ZNF721 | 4:103860868 |
| ZNF74  | 22:21522286 |
| ZNF74  | 22:21522286 |
| ZNF747 | 16:29961344 |
| ZNF747 | 16:30943214 |
| ZNF783 | 7:148086823 |
| ZNF783 | 7:148592640 |
| ZNF785 | 16:29961344 |
| ZNF785 | 16:31203669 |
| ZNF785 | 16:31203669 |
| ZNF786 | 7:148869277 |
| ZNF829 | 19:36635239 |

|        |             |
|--------|-------------|
| ZNF829 | 19:36635239 |
| ZNF843 | 16:32364540 |
| ZNF843 | 16:31203669 |
| ZNF850 | 19:36635239 |
| ZNF850 | 19:36635239 |
| ZP3    | 7:76060232  |
| ZP3    | 7:76060232  |
| ZP3    | 7:76060232  |
| ZSWIM7 | 17:15879910 |
| ZSWIM7 | 17:15879344 |
| ZSWIM7 | 17:15879910 |



































































































































































































































































**AP (brain) ct-eQTLs**

| <b>Cell-type</b>  | <b>Beta</b> | <b>Std Error</b> | <b>P-value</b> |
|-------------------|-------------|------------------|----------------|
| Neurons           | -0.181      | 0.0263           | 5.90E-12       |
| Microglia         | -0.473      | 0.0694           | 9.39E-12       |
| Endothelial cells | 2.18        | 0.287            | 3.06E-14       |
| Endothelial cells | 1.1         | 0.155            | 1.28E-12       |
| Endothelial cells | -1.1        | 0.163            | 1.49E-11       |
| Microglia         | -0.18       | 0.0258           | 3.02E-12       |
| Microglia         | 0.299       | 0.0353           | 2.45E-17       |
| Microglia         | 0.0372      | 0.00393          | 2.92E-21       |
| Endothelial cells | 0.0573      | 0.00645          | 6.47E-19       |
| Neurons           | 0.0314      | 0.00374          | 4.63E-17       |
| Oligodendroglia   | 0.102       | 0.0124           | 1.94E-16       |
| Endothelial cells | -1.88       | 0.271            | 4.00E-12       |
| Microglia         | -0.0862     | 0.01             | 6.70E-18       |
| Oligodendroglia   | 0.294       | 0.0366           | 9.53E-16       |
| Oligodendroglia   | -0.214      | 0.00941          | 1.73E-114      |
| Astrocytes        | -0.214      | 0.00942          | 3.00E-114      |
| Microglia         | -0.213      | 0.00941          | 1.94E-113      |
| Endothelial cells | -0.214      | 0.00948          | 7.83E-113      |
| Neurons           | -0.213      | 0.00945          | 1.70E-112      |
| Neurons           | 0.36        | 0.0284           | 8.03E-37       |
| Microglia         | 0.32        | 0.0279           | 1.88E-30       |
| Microglia         | -0.0339     | 0.00434          | 5.67E-15       |
| Astrocytes        | 0.0916      | 0.0122           | 5.99E-14       |
| Neurons           | -0.0307     | 0.0046           | 2.49E-11       |
| Microglia         | -0.168      | 0.0239           | 2.08E-12       |
| Endothelial cells | -0.153      | 0.0229           | 2.37E-11       |
| Microglia         | -0.401      | 0.0123           | 3.89E-233      |
| Astrocytes        | -1.91       | 0.0629           | 1.56E-202      |
| Endothelial cells | -0.81       | 0.0409           | 2.73E-87       |
| Oligodendroglia   | -1.64       | 0.0854           | 3.44E-82       |
| Neurons           | -0.344      | 0.0242           | 7.41E-46       |
| Oligodendroglia   | -7.69       | 0.733            | 9.49E-26       |
| Microglia         | -0.265      | 0.0317           | 6.29E-17       |
| Endothelial cells | -1.89       | 0.265            | 9.89E-13       |
| Neurons           | -0.187      | 0.0267           | 2.49E-12       |

|                   |        |         |           |
|-------------------|--------|---------|-----------|
| Astrocytes        | 0.542  | 0.0483  | 3.20E-29  |
| Oligodendroglia   | -0.227 | 0.0309  | 2.04E-13  |
| Neurons           | 0.0595 | 0.00868 | 7.14E-12  |
| Neurons           | -0.851 | 0.103   | 1.43E-16  |
| Endothelial cells | -0.756 | 0.101   | 7.15E-14  |
| Neurons           | -2.14  | 0.304   | 1.93E-12  |
| Endothelial cells | -3.82  | 0.565   | 1.37E-11  |
| Astrocytes        | -0.749 | 0.0601  | 1.19E-35  |
| Microglia         | -0.202 | 0.0238  | 2.11E-17  |
| Neurons           | -0.195 | 0.0237  | 1.91E-16  |
| Endothelial cells | 0.425  | 0.0423  | 9.44E-24  |
| Neurons           | 0.694  | 0.0978  | 1.28E-12  |
| Neurons           | -0.595 | 0.086   | 4.56E-12  |
| Microglia         | -0.841 | 0.0733  | 1.79E-30  |
| Neurons           | -0.741 | 0.0711  | 1.97E-25  |
| Endothelial cells | -0.802 | 0.12    | 2.34E-11  |
| Microglia         | 1.05   | 0.123   | 1.38E-17  |
| Neurons           | 0.864  | 0.127   | 1.02E-11  |
| Endothelial cells | 2.17   | 0.324   | 2.12E-11  |
| Endothelial cells | 0.673  | 0.098   | 6.54E-12  |
| Neurons           | -0.721 | 0.101   | 9.43E-13  |
| Endothelial cells | 1.18   | 0.137   | 7.11E-18  |
| Neurons           | -0.662 | 0.094   | 1.89E-12  |
| Microglia         | -2.51  | 0.366   | 6.99E-12  |
| Endothelial cells | 0.0772 | 0.00856 | 1.90E-19  |
| Neurons           | -0.101 | 0.0137  | 1.68E-13  |
| Endothelial cells | 0.23   | 0.0329  | 2.73E-12  |
| Neurons           | 0.164  | 0.0235  | 2.98E-12  |
| Endothelial cells | 1.09   | 0.14    | 6.93E-15  |
| Neurons           | 0.627  | 0.0865  | 4.21E-13  |
| Neurons           | -0.206 | 0.0285  | 4.90E-13  |
| Microglia         | -0.204 | 0.0284  | 6.81E-13  |
| Astrocytes        | -0.204 | 0.0285  | 8.19E-13  |
| Oligodendroglia   | -0.204 | 0.0285  | 8.19E-13  |
| Endothelial cells | -0.203 | 0.0285  | 1.06E-12  |
| Neurons           | -2.34  | 0.249   | 5.58E-21  |
| Endothelial cells | -2.82  | 0.337   | 5.86E-17  |
| Neurons           | -1.06  | 0.0323  | 3.33E-236 |
| Microglia         | -0.89  | 0.0397  | 2.62E-111 |



|                   |         |         |          |
|-------------------|---------|---------|----------|
| Oligodendroglia   | 0.548   | 0.0612  | 3.42E-19 |
| Microglia         | -0.433  | 0.0589  | 1.96E-13 |
| Astrocytes        | -2.48   | 0.341   | 3.52E-13 |
| Oligodendroglia   | 1.81    | 0.262   | 4.90E-12 |
| Endothelial cells | 0.524   | 0.0549  | 1.37E-21 |
| Neurons           | 0.258   | 0.0311  | 1.08E-16 |
| Endothelial cells | 0.167   | 0.0125  | 1.04E-40 |
| Neurons           | -0.0671 | 0.00872 | 1.42E-14 |
| Neurons           | 0.337   | 0.0404  | 7.33E-17 |
| Endothelial cells | 0.48    | 0.0646  | 1.08E-13 |
| Neurons           | 0.475   | 0.0454  | 1.28E-25 |
| Microglia         | 0.534   | 0.0571  | 8.60E-21 |
| Oligodendroglia   | 1.89    | 0.256   | 1.55E-13 |
| Oligodendroglia   | 0.134   | 0.0195  | 6.34E-12 |
| Microglia         | -0.831  | 0.105   | 2.49E-15 |
| Astrocytes        | -0.827  | 0.107   | 1.08E-14 |
| Oligodendroglia   | -0.823  | 0.107   | 1.45E-14 |
| Neurons           | -1      | 0.13    | 1.45E-14 |
| Endothelial cells | -0.826  | 0.108   | 2.04E-14 |
| Microglia         | 0.628   | 0.0788  | 1.59E-15 |
| Microglia         | 0.833   | 0.0441  | 1.41E-79 |
| Neurons           | 0.741   | 0.0441  | 2.33E-63 |
| Endothelial cells | 0.682   | 0.0756  | 1.86E-19 |
| Endothelial cells | 0.26    | 0.0308  | 3.13E-17 |
| Oligodendroglia   | 0.134   | 0.0201  | 2.62E-11 |
| Microglia         | 0.349   | 0.0441  | 2.50E-15 |
| Endothelial cells | 0.63    | 0.0869  | 4.18E-13 |
| Neurons           | 0.651   | 0.0524  | 1.94E-35 |
| Microglia         | 0.854   | 0.0846  | 5.84E-24 |
| Neurons           | -1.5    | 0.211   | 1.17E-12 |
| Oligodendroglia   | -2.17   | 0.313   | 4.12E-12 |
| Endothelial cells | -2.12   | 0.309   | 6.85E-12 |
| Astrocytes        | -2.14   | 0.315   | 1.09E-11 |
| Microglia         | -2.03   | 0.3     | 1.32E-11 |
| Endothelial cells | 2.09    | 0.279   | 6.83E-14 |
| Microglia         | -2.25   | 0.313   | 6.55E-13 |
| Neurons           | -2.05   | 0.289   | 1.31E-12 |
| Endothelial cells | 1.02    | 0.151   | 1.43E-11 |
| Microglia         | -0.04   | 0.00449 | 5.16E-19 |

|                   |        |         |          |
|-------------------|--------|---------|----------|
| Neurons           | 0.0493 | 0.00561 | 1.52E-18 |
| Neurons           | 0.115  | 0.0135  | 1.62E-17 |
| Oligodendroglia   | -0.326 | 0.0466  | 2.64E-12 |
| Endothelial cells | -0.585 | 0.0746  | 4.44E-15 |
| Microglia         | 0.277  | 0.0362  | 1.98E-14 |
| Neurons           | 0.289  | 0.0427  | 1.30E-11 |
| Neurons           | -0.679 | 0.093   | 2.85E-13 |
| Endothelial cells | -1.62  | 0.175   | 2.10E-20 |
| Neurons           | -0.715 | 0.107   | 2.35E-11 |
| Astrocytes        | -0.207 | 0.0306  | 1.34E-11 |
| Microglia         | -0.208 | 0.0309  | 1.68E-11 |
| Neurons           | -0.208 | 0.0309  | 1.68E-11 |
| Oligodendroglia   | -0.205 | 0.0308  | 2.82E-11 |
| Neurons           | -0.46  | 0.0654  | 2.01E-12 |
| Endothelial cells | 1.94   | 0.199   | 1.87E-22 |
| Neurons           | 0.691  | 0.0897  | 1.32E-14 |
| Endothelial cells | 0.819  | 0.118   | 3.90E-12 |
| Endothelial cells | -1.05  | 0.141   | 9.56E-14 |
| Neurons           | -0.306 | 0.0451  | 1.16E-11 |
| Neurons           | -1.09  | 0.154   | 1.46E-12 |
| Neurons           | -2.96  | 0.284   | 1.96E-25 |
| Endothelial cells | -2.88  | 0.284   | 3.64E-24 |
| Oligodendroglia   | -2.9   | 0.287   | 5.27E-24 |
| Microglia         | -2.85  | 0.284   | 1.07E-23 |
| Astrocytes        | -2.83  | 0.286   | 4.37E-23 |
| Endothelial cells | 1.83   | 0.231   | 2.34E-15 |
| Neurons           | -0.378 | 0.0492  | 1.55E-14 |
| Microglia         | -0.36  | 0.0524  | 6.41E-12 |
| Microglia         | -1.6   | 0.196   | 3.26E-16 |
| Astrocytes        | -1.57  | 0.199   | 3.04E-15 |
| Oligodendroglia   | -1.6   | 0.203   | 3.23E-15 |
| Neurons           | -1.62  | 0.211   | 1.62E-14 |
| Endothelial cells | -1.42  | 0.203   | 2.65E-12 |
| Endothelial cells | 0.0811 | 0.00995 | 3.62E-16 |
| Neurons           | -0.652 | 0.0798  | 3.07E-16 |
| Endothelial cells | -0.832 | 0.12    | 4.11E-12 |
| Neurons           | 0.488  | 0.0714  | 8.22E-12 |
| Microglia         | -0.134 | 0.0144  | 1.33E-20 |
| Neurons           | 0.117  | 0.0176  | 2.98E-11 |

|                   |        |        |          |
|-------------------|--------|--------|----------|
| Endothelial cells | 1.55   | 0.223  | 3.64E-12 |
| Neurons           | 0.121  | 0.0104 | 2.75E-31 |
| Microglia         | 0.0936 | 0.0119 | 3.67E-15 |
| Endothelial cells | 0.828  | 0.107  | 1.01E-14 |
| Oligodendroglia   | -0.265 | 0.0397 | 2.47E-11 |
| Endothelial cells | -0.973 | 0.13   | 7.18E-14 |
| Neurons           | 0.411  | 0.0532 | 1.11E-14 |
| Endothelial cells | 0.625  | 0.0917 | 9.38E-12 |
| Microglia         | -2.84  | 0.318  | 4.23E-19 |
| Oligodendroglia   | -2.82  | 0.352  | 1.13E-15 |
| Astrocytes        | -2.79  | 0.349  | 1.30E-15 |
| Neurons           | 3.69   | 0.467  | 2.76E-15 |
| Endothelial cells | 8.96   | 1.17   | 1.89E-14 |
| Endothelial cells | 4.55   | 0.398  | 2.89E-30 |
| Neurons           | 1.44   | 0.183  | 3.58E-15 |
| Astrocytes        | 61.2   | 8.18   | 7.34E-14 |
| Microglia         | -0.137 | 0.0161 | 1.75E-17 |
| Oligodendroglia   | -0.394 | 0.0586 | 1.77E-11 |
| Endothelial cells | 0.456  | 0.0641 | 1.13E-12 |
| Astrocytes        | -1.43  | 0.189  | 3.84E-14 |
| Endothelial cells | -0.511 | 0.0748 | 8.40E-12 |
| Astrocytes        | 0.146  | 0.0203 | 6.38E-13 |
| Endothelial cells | 0.934  | 0.114  | 2.55E-16 |
| Oligodendroglia   | -13    | 0.991  | 2.59E-39 |
| Neurons           | 1.35   | 0.129  | 1.25E-25 |
| Microglia         | -2.91  | 0.311  | 8.21E-21 |
| Endothelial cells | 4.02   | 0.534  | 5.15E-14 |
| Astrocytes        | -0.24  | 0.0338 | 1.24E-12 |
| Endothelial cells | 2.37   | 0.319  | 1.09E-13 |
| Neurons           | 0.423  | 0.0544 | 7.50E-15 |
| Microglia         | 0.452  | 0.0641 | 1.77E-12 |
| Astrocytes        | 7.56   | 0.808  | 8.25E-21 |
| Microglia         | -6.64  | 0.83   | 1.24E-15 |
| Endothelial cells | -4.09  | 0.525  | 6.68E-15 |
| Neurons           | 381    | 50.9   | 7.14E-14 |
| Oligodendroglia   | -8.14  | 1.16   | 2.26E-12 |
| Microglia         | 0.49   | 0.0448 | 7.63E-28 |
| Neurons           | 0.427  | 0.0431 | 3.87E-23 |
| Neurons           | 0.732  | 0.109  | 1.87E-11 |

|                   |         |         |          |
|-------------------|---------|---------|----------|
| Astrocytes        | 0.159   | 0.02    | 1.87E-15 |
| Neurons           | 0.0312  | 0.004   | 6.19E-15 |
| Endothelial cells | -1.46   | 0.158   | 2.45E-20 |
| Astrocytes        | -1.71   | 0.189   | 1.46E-19 |
| Oligodendroglia   | -4.7    | 0.542   | 4.26E-18 |
| Microglia         | 2.72    | 0.334   | 3.83E-16 |
| Neurons           | 0.737   | 0.101   | 2.94E-13 |
| Microglia         | -0.0331 | 0.00487 | 1.07E-11 |
| Astrocytes        | -0.4    | 0.0569  | 2.07E-12 |
| Endothelial cells | -0.399  | 0.0569  | 2.34E-12 |
| Neurons           | -0.397  | 0.0568  | 2.76E-12 |
| Microglia         | -0.396  | 0.0568  | 3.13E-12 |
| Oligodendroglia   | -0.388  | 0.0574  | 1.38E-11 |
| Endothelial cells | 0.786   | 0.111   | 1.43E-12 |
| Microglia         | -0.274  | 0.039   | 2.13E-12 |
| Neurons           | -0.366  | 0.0276  | 3.90E-40 |
| Microglia         | 0.278   | 0.0302  | 3.41E-20 |
| Endothelial cells | 0.267   | 0.0375  | 1.08E-12 |
| Astrocytes        | 0.476   | 0.0564  | 3.18E-17 |
| Endothelial cells | -2.71   | 0.349   | 8.16E-15 |
| Neurons           | -1.73   | 0.235   | 1.82E-13 |
| Microglia         | 1.91    | 0.287   | 2.83E-11 |
| Endothelial cells | -0.763  | 0.104   | 2.19E-13 |
| Endothelial cells | -1.32   | 0.193   | 7.95E-12 |
| Neurons           | 0.472   | 0.0593  | 1.73E-15 |
| Microglia         | 0.516   | 0.0652  | 2.49E-15 |
| Endothelial cells | 0.323   | 0.0448  | 5.60E-13 |
| Astrocytes        | 0.322   | 0.0449  | 7.42E-13 |
| Oligodendroglia   | 0.322   | 0.045   | 8.33E-13 |
| Neurons           | 0.321   | 0.045   | 9.80E-13 |
| Microglia         | 0.313   | 0.0449  | 3.15E-12 |
| Microglia         | 0.668   | 0.0877  | 2.60E-14 |
| Microglia         | -0.341  | 0.0474  | 6.29E-13 |
| Neurons           | -0.537  | 0.0607  | 9.01E-19 |
| Microglia         | -0.543  | 0.0616  | 1.20E-18 |
| Endothelial cells | -0.802  | 0.101   | 2.01E-15 |
| Oligodendroglia   | -1.23   | 0.183   | 1.80E-11 |
| Neurons           | -0.606  | 0.0758  | 1.30E-15 |
| Microglia         | -0.58   | 0.0759  | 2.14E-14 |

|                   |           |          |          |
|-------------------|-----------|----------|----------|
| Neurons           | 0.497     | 0.0564   | 1.23E-18 |
| Microglia         | 0.393     | 0.0569   | 4.96E-12 |
| Microglia         | -0.44     | 0.0652   | 1.49E-11 |
| Neurons           | 0.346     | 0.0438   | 2.80E-15 |
| Endothelial cells | 0.401     | 0.0543   | 1.53E-13 |
| Oligodendroglia   | 2.43      | 0.21     | 5.75E-31 |
| Endothelial cells | 1.59      | 0.239    | 2.88E-11 |
| Microglia         | -0.153    | 0.0175   | 2.27E-18 |
| Oligodendroglia   | -7.28     | 1.04     | 2.56E-12 |
| Oligodendroglia   | 3.61      | 0.497    | 3.77E-13 |
| Microglia         | 0.811     | 0.111    | 2.75E-13 |
| Neurons           | 0.693     | 0.102    | 1.09E-11 |
| Oligodendroglia   | 3.71      | 0.536    | 4.46E-12 |
| Oligodendroglia   | 1.35      | 0.143    | 3.71E-21 |
| Astrocytes        | -0.151    | 0.0211   | 8.28E-13 |
| Neurons           | 0.374     | 0.0368   | 2.90E-24 |
| Microglia         | 0.384     | 0.0419   | 4.97E-20 |
| Oligodendroglia   | 1.71      | 0.175    | 1.49E-22 |
| Endothelial cells | -3.54E-15 | 3.98E-16 | 5.87E-19 |
| Endothelial cells | -7.1      | 0.659    | 4.57E-27 |
| Oligodendroglia   | -5.09     | 0.507    | 1.02E-23 |
| Microglia         | 1.23      | 0.143    | 7.88E-18 |
| Astrocytes        | 26.3      | 3.72     | 1.55E-12 |
| Microglia         | -0.336    | 0.0374   | 2.61E-19 |
| Neurons           | -0.272    | 0.036    | 4.17E-14 |
| Endothelial cells | -0.43     | 0.0609   | 1.66E-12 |
| Microglia         | -4.43E-17 | 5.20E-18 | 1.61E-17 |
| Oligodendroglia   | 1.97      | 0.255    | 1.11E-14 |
| Neurons           | 0.604     | 0.0893   | 1.34E-11 |
| Endothelial cells | 1.2       | 0.171    | 2.26E-12 |
| Astrocytes        | 1.24      | 0.18     | 5.62E-12 |
| Microglia         | 1.26      | 0.188    | 2.05E-11 |
| Neurons           | 3         | 0.257    | 1.75E-31 |
| Endothelial cells | 4.32      | 0.398    | 1.90E-27 |
| Astrocytes        | 12.8      | 1.71     | 7.13E-14 |
| Oligodendroglia   | 0.65      | 0.0813   | 1.29E-15 |
| Oligodendroglia   | 0.353     | 0.0368   | 8.61E-22 |
| Microglia         | -0.0943   | 0.0102   | 2.35E-20 |
| Microglia         | 0.343     | 0.0413   | 9.97E-17 |

|                   |        |        |          |
|-------------------|--------|--------|----------|
| Neurons           | 0.32   | 0.0429 | 8.70E-14 |
| Endothelial cells | 0.699  | 0.105  | 2.79E-11 |
| Microglia         | -0.303 | 0.0404 | 6.38E-14 |
| Oligodendroglia   | 0.193  | 0.028  | 5.47E-12 |
| Endothelial cells | 0.193  | 0.0281 | 6.50E-12 |
| Neurons           | 0.192  | 0.028  | 7.03E-12 |
| Astrocytes        | 0.191  | 0.0281 | 1.07E-11 |
| Microglia         | -0.385 | 0.0458 | 4.24E-17 |
| Endothelial cells | -0.234 | 0.0317 | 1.56E-13 |
| Neurons           | -0.233 | 0.0317 | 1.98E-13 |
| Astrocytes        | -0.232 | 0.0316 | 2.11E-13 |
| Oligodendroglia   | -0.232 | 0.0316 | 2.11E-13 |
| Endothelial cells | 0.62   | 0.0887 | 2.75E-12 |
| Microglia         | 0.222  | 0.0287 | 1.03E-14 |
| Neurons           | 0.208  | 0.0278 | 7.32E-14 |
| Endothelial cells | 1.2    | 0.153  | 4.39E-15 |
| Neurons           | 0.461  | 0.0669 | 5.54E-12 |
| Endothelial cells | 1.22   | 0.171  | 9.71E-13 |
| Neurons           | 0.468  | 0.0569 | 1.95E-16 |
| Endothelial cells | 0.61   | 0.0876 | 3.32E-12 |
| Microglia         | 0.227  | 0.0273 | 9.17E-17 |
| Endothelial cells | 1.29   | 0.188  | 6.80E-12 |
| Neurons           | 0.304  | 0.0349 | 3.02E-18 |
| Endothelial cells | 1.66   | 0.219  | 3.46E-14 |
| Astrocytes        | 1.55   | 0.218  | 1.16E-12 |
| Oligodendroglia   | 1.52   | 0.214  | 1.22E-12 |
| Microglia         | 1.54   | 0.221  | 3.21E-12 |
| Neurons           | 1.5    | 0.223  | 1.74E-11 |
| Endothelial cells | 0.691  | 0.0875 | 2.85E-15 |
| Neurons           | 0.416  | 0.0534 | 6.69E-15 |
| Oligodendroglia   | -6.49  | 0.889  | 2.87E-13 |
| Endothelial cells | 1.01   | 0.104  | 2.69E-22 |
| Neurons           | -0.529 | 0.0591 | 3.52E-19 |
| Neurons           | 1.26   | 0.152  | 1.14E-16 |
| Endothelial cells | 2.23   | 0.288  | 9.71E-15 |
| Endothelial cells | -0.529 | 0.0291 | 7.61E-74 |
| Neurons           | -0.183 | 0.0159 | 1.18E-30 |
| Microglia         | 0.212  | 0.0281 | 4.54E-14 |
| Oligodendroglia   | 1.07   | 0.151  | 1.38E-12 |

|                   |         |         |          |
|-------------------|---------|---------|----------|
| Oligodendroglia   | 0.129   | 0.0113  | 3.48E-30 |
| Microglia         | -0.0361 | 0.00367 | 7.84E-23 |
| Endothelial cells | -0.663  | 0.0972  | 9.04E-12 |
| Endothelial cells | -0.859  | 0.0933  | 3.36E-20 |
| Neurons           | 1.09    | 0.13    | 5.09E-17 |
| Neurons           | 0.361   | 0.0488  | 1.39E-13 |
| Neurons           | 3.98    | 0.482   | 1.49E-16 |
| Astrocytes        | -3.16   | 0.397   | 1.72E-15 |
| Microglia         | -3.15   | 0.401   | 3.99E-15 |
| Oligodendroglia   | -3.13   | 0.4     | 5.08E-15 |
| Endothelial cells | -3.08   | 0.405   | 2.85E-14 |
| Endothelial cells | -1.51   | 0.188   | 9.60E-16 |
| Neurons           | -0.668  | 0.0983  | 1.08E-11 |
| Neurons           | -0.581  | 0.0781  | 1.01E-13 |
| Oligodendroglia   | 1.64    | 0.194   | 2.82E-17 |
| Neurons           | -0.362  | 0.0519  | 3.06E-12 |
| Endothelial cells | 1.41    | 0.163   | 5.14E-18 |
| Neurons           | 0.652   | 0.0974  | 2.17E-11 |
| Endothelial cells | 1.09    | 0.14    | 6.93E-15 |
| Oligodendroglia   | 0.0786  | 0.00815 | 5.20E-22 |
| Microglia         | -0.0242 | 0.00278 | 3.17E-18 |
| Astrocytes        | -0.126  | 0.0175  | 6.02E-13 |
| Endothelial cells | 0.77    | 0.109   | 1.62E-12 |
| Neurons           | -0.0404 | 0.00386 | 1.23E-25 |
| Endothelial cells | 0.17    | 0.0245  | 3.96E-12 |
| Neurons           | 0.173   | 0.0197  | 1.61E-18 |
| Endothelial cells | -0.251  | 0.0304  | 1.50E-16 |
| Oligodendroglia   | 0.367   | 0.0405  | 1.28E-19 |
| Endothelial cells | 0.174   | 0.0193  | 1.96E-19 |
| Microglia         | 0.0937  | 0.0139  | 1.57E-11 |
| Endothelial cells | -0.866  | 0.109   | 1.94E-15 |
| Neurons           | -0.562  | 0.0786  | 8.67E-13 |
| Neurons           | -0.247  | 0.0293  | 3.46E-17 |
| Oligodendroglia   | -0.247  | 0.0295  | 5.62E-17 |
| Astrocytes        | -0.246  | 0.0294  | 5.89E-17 |
| Endothelial cells | -0.245  | 0.0293  | 6.18E-17 |
| Microglia         | -0.245  | 0.0294  | 7.86E-17 |
| Oligodendroglia   | 5.39    | 0.618   | 2.74E-18 |
| Microglia         | -2.14   | 0.28    | 2.12E-14 |

|                   |        |         |          |
|-------------------|--------|---------|----------|
| Oligodendroglia   | 5.28   | 0.539   | 1.17E-22 |
| Oligodendroglia   | -1.92  | 0.189   | 3.03E-24 |
| Microglia         | -0.344 | 0.0464  | 1.23E-13 |
| Oligodendroglia   | 0.972  | 0.0866  | 3.11E-29 |
| Microglia         | -0.185 | 0.0259  | 9.14E-13 |
| Oligodendroglia   | 1.94   | 0.183   | 2.95E-26 |
| Microglia         | -0.462 | 0.0579  | 1.47E-15 |
| Oligodendroglia   | 0.12   | 0.0156  | 1.45E-14 |
| Microglia         | -0.552 | 0.0476  | 4.29E-31 |
| Neurons           | -0.451 | 0.05    | 1.88E-19 |
| Microglia         | -0.591 | 0.062   | 1.54E-21 |
| Neurons           | -0.482 | 0.0613  | 3.75E-15 |
| Endothelial cells | 0.75   | 0.094   | 1.48E-15 |
| Oligodendroglia   | -1.77  | 0.212   | 6.88E-17 |
| Microglia         | -1.77  | 0.213   | 9.58E-17 |
| Endothelial cells | -1.76  | 0.212   | 1.02E-16 |
| Astrocytes        | -1.77  | 0.214   | 1.33E-16 |
| Neurons           | -1.76  | 0.213   | 1.42E-16 |
| Endothelial cells | 2.25   | 0.33    | 9.22E-12 |
| Neurons           | -0.372 | 0.0272  | 1.40E-42 |
| Microglia         | -0.35  | 0.0295  | 1.81E-32 |
| Endothelial cells | -0.513 | 0.0487  | 6.03E-26 |
| Neurons           | -0.598 | 0.0451  | 3.98E-40 |
| Microglia         | -0.588 | 0.0471  | 9.12E-36 |
| Endothelial cells | -0.605 | 0.0737  | 2.23E-16 |
| Endothelial cells | 0.599  | 0.071   | 3.27E-17 |
| Endothelial cells | 3.56   | 0.478   | 9.50E-14 |
| Oligodendroglia   | -0.429 | 0.0509  | 3.51E-17 |
| Endothelial cells | 2.04   | 0.275   | 1.19E-13 |
| Endothelial cells | 0.581  | 0.0464  | 5.69E-36 |
| Oligodendroglia   | 0.948  | 0.094   | 6.43E-24 |
| Microglia         | 0.258  | 0.0351  | 1.98E-13 |
| Endothelial cells | 0.098  | 0.0113  | 4.22E-18 |
| Oligodendroglia   | -0.152 | 0.018   | 3.05E-17 |
| Neurons           | 0.0324 | 0.00403 | 9.01E-16 |
| Microglia         | 0.0229 | 0.0032  | 8.29E-13 |
| Neurons           | -0.105 | 0.00896 | 1.02E-31 |
| Microglia         | 0.0319 | 0.00467 | 8.44E-12 |
| Microglia         | 0.0486 | 0.00409 | 1.46E-32 |



|                   |         |          |           |
|-------------------|---------|----------|-----------|
| Microglia         | 0.0486  | 0.00409  | 1.46E-32  |
| Astrocytes        | 89.1    | 2.60E-10 | <1.0E-314 |
| Endothelial cells | -2.93   | 2.70E-13 | <1.0E-314 |
| Microglia         | -0.377  | 3.51E-15 | <1.0E-314 |
| Neurons           | -0.739  | 1.51E-14 | <1.0E-314 |
| Oligodendroglia   | -5.08   | 8.36E-13 | <1.0E-314 |
| Neurons           | -0.833  | 0.0467   | 3.63E-71  |
| Endothelial cells | -1.98   | 0.117    | 3.04E-64  |
| Oligodendroglia   | -4.07   | 0.248    | 1.59E-60  |
| Microglia         | -7.42   | 0.46     | 1.56E-58  |
| Astrocytes        | -23.5   | 1.48     | 8.95E-57  |
| Neurons           | 0.0347  | 0.0051   | 1.02E-11  |
| Astrocytes        | -0.176  | 0.0166   | 2.90E-26  |
| Microglia         | -0.0297 | 0.00332  | 3.69E-19  |
| Oligodendroglia   | -1.27   | 0.0809   | 1.55E-55  |
| Endothelial cells | -0.907  | 0.0627   | 2.00E-47  |
| Astrocytes        | 4.24    | 0.301    | 4.61E-45  |
| Neurons           | -0.621  | 0.073    | 1.79E-17  |
| Endothelial cells | 1       | 0.101    | 4.12E-23  |
| Neurons           | 0.51    | 0.0623   | 2.70E-16  |
| Endothelial cells | 1.17    | 0.127    | 3.18E-20  |
| Endothelial cells | 1.27    | 0.101    | 2.93E-36  |
| Neurons           | 0.437   | 0.0544   | 9.50E-16  |
| Microglia         | 0.26    | 0.0386   | 1.63E-11  |
| Neurons           | 0.387   | 0.0551   | 2.16E-12  |
| Endothelial cells | -2.5    | 0.376    | 2.95E-11  |
| Endothelial cells | 1.05    | 0.154    | 9.22E-12  |
| Endothelial cells | -4.11   | 0.434    | 2.80E-21  |
| Endothelial cells | 2.64    | 0.314    | 4.18E-17  |
| Microglia         | -0.287  | 0.0429   | 2.23E-11  |
| Endothelial cells | -3.05   | 0.248    | 9.24E-35  |
| Neurons           | -2.18   | 0.186    | 1.00E-31  |
| Microglia         | 1.97    | 0.239    | 1.68E-16  |
| Endothelial cells | -0.0491 | 0.00717  | 7.49E-12  |
| Oligodendroglia   | 1.95    | 0.209    | 1.06E-20  |
| Neurons           | -1.96   | 0.257    | 2.41E-14  |
| Astrocytes        | -1.61   | 0.217    | 1.18E-13  |
| Microglia         | -1.6    | 0.22     | 3.52E-13  |
| Endothelial cells | -1.59   | 0.225    | 1.59E-12  |

|                   |         |         |          |
|-------------------|---------|---------|----------|
| Microglia         | -0.326  | 0.0372  | 1.89E-18 |
| Neurons           | -0.258  | 0.0372  | 4.05E-12 |
| Endothelial cells | 0.726   | 0.0745  | 1.94E-22 |
| Neurons           | 0.291   | 0.0407  | 8.69E-13 |
| Astrocytes        | 2.46    | 0.205   | 3.55E-33 |
| Microglia         | 2.5     | 0.221   | 1.14E-29 |
| Oligodendroglia   | 2.5     | 0.225   | 1.11E-28 |
| Neurons           | 2.52    | 0.236   | 1.29E-26 |
| Endothelial cells | 2.28    | 0.225   | 3.93E-24 |
| Endothelial cells | -5.75   | 0.523   | 4.07E-28 |
| Oligodendroglia   | -19.3   | 1.8     | 8.01E-27 |
| Microglia         | -0.447  | 0.0454  | 7.15E-23 |
| Astrocytes        | 1.61    | 0.172   | 7.94E-21 |
| Neurons           | -0.781  | 0.0892  | 2.03E-18 |
| Oligodendroglia   | 0.276   | 0.039   | 1.47E-12 |
| Neurons           | 0.328   | 0.045   | 3.13E-13 |
| Endothelial cells | -1.94   | 0.286   | 1.18E-11 |
| Microglia         | -0.341  | 0.0501  | 1.00E-11 |
| Microglia         | 0.436   | 0.0544  | 1.10E-15 |
| Microglia         | -0.0267 | 0.00247 | 3.10E-27 |
| Oligodendroglia   | 0.0961  | 0.0107  | 2.68E-19 |
| Microglia         | 1.06    | 0.0818  | 2.10E-38 |
| Endothelial cells | 1.23    | 0.177   | 3.67E-12 |
| Neurons           | 0.538   | 0.0793  | 1.17E-11 |
| Neurons           | 0.51    | 0.0425  | 3.55E-33 |
| Microglia         | 0.386   | 0.0399  | 3.88E-22 |
| Neurons           | 0.793   | 0.0927  | 1.18E-17 |
| Endothelial cells | 1.25    | 0.154   | 4.78E-16 |
| Endothelial cells | 0.546   | 0.0544  | 1.05E-23 |
| Neurons           | 0.218   | 0.031   | 2.03E-12 |
| Oligodendroglia   | 0.399   | 0.0583  | 7.71E-12 |
| Neurons           | 0.206   | 0.0308  | 2.26E-11 |
| Astrocytes        | 11.2    | 1.54    | 3.52E-13 |
| Oligodendroglia   | 8.67    | 1.23    | 1.80E-12 |
| Endothelial cells | -0.764  | 0.11    | 3.77E-12 |
| Microglia         | -4.39   | 0.276   | 5.78E-57 |
| Astrocytes        | -4.39   | 0.277   | 1.44E-56 |
| Oligodendroglia   | -4.37   | 0.282   | 3.67E-54 |
| Endothelial cells | -4.4    | 0.285   | 9.00E-54 |

|                   |         |         |          |
|-------------------|---------|---------|----------|
| Neurons           | -4.28   | 0.282   | 5.00E-52 |
| Endothelial cells | 1.18    | 0.174   | 1.19E-11 |
| Neurons           | 0.73    | 0.0966  | 4.13E-14 |
| Microglia         | -0.445  | 0.0651  | 8.16E-12 |
| Microglia         | -1.59   | 0.146   | 1.28E-27 |
| Neurons           | -1.65   | 0.169   | 1.62E-22 |
| Endothelial cells | 1.54    | 0.221   | 3.21E-12 |
| Endothelial cells | -2.43   | 0.279   | 3.05E-18 |
| Neurons           | -1.16   | 0.166   | 2.79E-12 |
| Oligodendroglia   | 0.0844  | 0.00683 | 4.45E-35 |
| Microglia         | -0.0245 | 0.00215 | 4.41E-30 |
| Astrocytes        | 1.12    | 0.148   | 3.80E-14 |
| Oligodendroglia   | 1.13    | 0.151   | 7.24E-14 |
| Microglia         | 1.13    | 0.152   | 1.05E-13 |
| Neurons           | 1.13    | 0.153   | 1.52E-13 |
| Endothelial cells | 1.07    | 0.152   | 1.93E-12 |
| Endothelial cells | 1.24    | 0.127   | 1.61E-22 |
| Neurons           | 0.52    | 0.0691  | 5.26E-14 |
| Microglia         | -2.21   | 0.118   | 2.88E-78 |
| Neurons           | -1.99   | 0.116   | 5.75E-66 |
| Endothelial cells | -2.4    | 0.199   | 1.71E-33 |
| Neurons           | 0.262   | 0.0348  | 5.12E-14 |
| Microglia         | -0.195  | 0.0231  | 3.13E-17 |
| Neurons           | -0.167  | 0.0213  | 4.49E-15 |
| Oligodendroglia   | -1.53   | 0.129   | 1.90E-32 |
| Microglia         | -0.801  | 0.0738  | 1.92E-27 |
| Neurons           | -0.403  | 0.0405  | 2.51E-23 |
| Astrocytes        | -2.16   | 0.239   | 1.60E-19 |
| Endothelial cells | -0.653  | 0.0803  | 4.22E-16 |
| Neurons           | 0.132   | 0.0122  | 2.78E-27 |
| Endothelial cells | -0.33   | 0.0315  | 1.11E-25 |
| Endothelial cells | -1.91   | 0.22    | 3.89E-18 |
| Neurons           | 0.675   | 0.0791  | 1.42E-17 |
| Endothelial cells | -4.4    | 0.555   | 2.23E-15 |
| Astrocytes        | -4.96   | 0.367   | 1.28E-41 |
| Oligodendroglia   | -4.96   | 0.371   | 9.14E-41 |
| Neurons           | -4.99   | 0.374   | 1.31E-40 |
| Microglia         | -4.95   | 0.372   | 2.12E-40 |
| Endothelial cells | -4.79   | 0.371   | 3.90E-38 |

|                   |        |        |          |
|-------------------|--------|--------|----------|
| Endothelial cells | -0.132 | 0.0131 | 7.03E-24 |
| Neurons           | -2.71  | 0.314  | 6.10E-18 |
| Microglia         | -2.65  | 0.308  | 7.71E-18 |
| Oligodendroglia   | -2.65  | 0.31   | 1.25E-17 |
| Astrocytes        | -2.63  | 0.311  | 2.75E-17 |
| Endothelial cells | -2.44  | 0.307  | 1.90E-15 |
| Endothelial cells | -0.985 | 0.123  | 1.16E-15 |
| Neurons           | -0.463 | 0.0693 | 2.37E-11 |
| Astrocytes        | -1.76  | 0.223  | 2.96E-15 |
| Oligodendroglia   | -1.75  | 0.227  | 1.27E-14 |
| Microglia         | -1.75  | 0.228  | 1.65E-14 |
| Neurons           | -2.19  | 0.289  | 3.51E-14 |
| Endothelial cells | -3.98  | 0.542  | 2.09E-13 |
| Oligodendroglia   | -2.11  | 0.101  | 6.45E-97 |
| Astrocytes        | 2.31   | 0.21   | 3.82E-28 |
| Microglia         | 0.335  | 0.0348 | 6.18E-22 |
| Neurons           | -0.188 | 0.0275 | 8.12E-12 |
| Neurons           | -0.267 | 0.0305 | 2.06E-18 |
| Endothelial cells | -0.436 | 0.0589 | 1.34E-13 |
| Microglia         | -0.216 | 0.032  | 1.48E-11 |
| Oligodendroglia   | 0.927  | 0.115  | 7.58E-16 |
| Neurons           | -0.498 | 0.0683 | 3.07E-13 |
| Microglia         | -0.448 | 0.0653 | 6.86E-12 |
| Endothelial cells | 0.932  | 0.129  | 5.02E-13 |
| Neurons           | 0.481  | 0.0721 | 2.54E-11 |
| Endothelial cells | -2.02  | 0.287  | 1.95E-12 |
| Endothelial cells | -0.832 | 0.118  | 1.78E-12 |
| Endothelial cells | -0.55  | 0.0819 | 1.87E-11 |
| Microglia         | 0.409  | 0.0478 | 1.16E-17 |
| Neurons           | 0.363  | 0.0403 | 2.11E-19 |
| Endothelial cells | 0.822  | 0.106  | 8.85E-15 |
| Neurons           | 0.826  | 0.0881 | 6.87E-21 |
| Microglia         | -0.322 | 0.0428 | 5.34E-14 |
| Neurons           | -0.273 | 0.0401 | 9.90E-12 |
| Microglia         | -0.134 | 0.0147 | 7.82E-20 |
| Neurons           | 0.129  | 0.0148 | 2.88E-18 |
| Microglia         | -2.5   | 0.325  | 1.45E-14 |
| Neurons           | -2.27  | 0.308  | 1.70E-13 |
| Endothelial cells | -1.05  | 0.0675 | 1.46E-54 |

|                   |           |          |          |
|-------------------|-----------|----------|----------|
| Astrocytes        | -2.53     | 0.231    | 6.47E-28 |
| Microglia         | 0.458     | 0.0604   | 3.38E-14 |
| Neurons           | 0.479     | 0.0643   | 9.37E-14 |
| Astrocytes        | 0.224     | 0.029    | 1.13E-14 |
| Endothelial cells | 0.0626    | 0.00674  | 1.57E-20 |
| Oligodendroglia   | 1.25      | 0.141    | 7.63E-19 |
| Astrocytes        | -6.21E-16 | 9.11E-17 | 9.32E-12 |
| Endothelial cells | 1.15      | 0.145    | 2.17E-15 |
| Neurons           | 0.507     | 0.0685   | 1.35E-13 |
| Microglia         | 0.15      | 0.0205   | 2.53E-13 |
| Neurons           | -4.54     | 0.231    | 5.38E-86 |
| Endothelial cells | -6.39     | 0.343    | 1.84E-77 |
| Microglia         | -33.2     | 2.06     | 1.95E-58 |
| Oligodendroglia   | -3090     | 202      | 8.00E-53 |
| Astrocytes        | 201       | 13.4     | 7.34E-51 |
| Astrocytes        | -0.259    | 0.0299   | 4.63E-18 |
| Endothelial cells | -0.241    | 0.0301   | 1.18E-15 |
| Oligodendroglia   | -0.297    | 0.0432   | 6.20E-12 |
| Endothelial cells | 1.58      | 0.191    | 1.31E-16 |
| Neurons           | -0.578    | 0.043    | 3.44E-41 |
| Microglia         | -0.51     | 0.0465   | 5.46E-28 |
| Endothelial cells | -0.693    | 0.0734   | 3.68E-21 |
| Neurons           | 0.106     | 0.0115   | 3.04E-20 |
| Microglia         | -0.068    | 0.00979  | 3.76E-12 |
| Microglia         | 0.111     | 0.0146   | 2.90E-14 |
| Endothelial cells | 1         | 0.137    | 2.89E-13 |
| Microglia         | -0.441    | 0.0563   | 4.76E-15 |
| Microglia         | -0.593    | 0.0454   | 5.45E-39 |
| Neurons           | -0.492    | 0.0442   | 8.84E-29 |
| Neurons           | -0.407    | 0.0593   | 6.72E-12 |
| Neurons           | 0.541     | 0.0671   | 7.47E-16 |
| Astrocytes        | -0.205    | 0.0272   | 4.82E-14 |
| Neurons           | 0.109     | 0.0139   | 4.44E-15 |
| Endothelial cells | 0.157     | 0.0219   | 7.56E-13 |
| Endothelial cells | -1.19     | 0.168    | 1.41E-12 |
| Microglia         | -0.346    | 0.0506   | 8.03E-12 |
| Oligodendroglia   | 0.243     | 0.0284   | 1.17E-17 |
| Endothelial cells | -0.399    | 0.0554   | 5.93E-13 |
| Neurons           | -0.246    | 0.0346   | 1.16E-12 |

|                   |         |         |           |
|-------------------|---------|---------|-----------|
| Endothelial cells | -2.82   | 0.393   | 7.20E-13  |
| Microglia         | 0.053   | 0.00725 | 2.66E-13  |
| Microglia         | 0.552   | 0.0811  | 1.00E-11  |
| Neurons           | -2.19   | 0.217   | 5.98E-24  |
| Microglia         | -2.2    | 0.233   | 3.66E-21  |
| Microglia         | -0.81   | 0.0966  | 5.07E-17  |
| Endothelial cells | -1.28   | 0.164   | 5.96E-15  |
| Endothelial cells | -1.2    | 0.167   | 6.69E-13  |
| Neurons           | 0.399   | 0.0429  | 1.40E-20  |
| Endothelial cells | 2.88    | 0.194   | 7.46E-50  |
| Oligodendroglia   | 2.72    | 0.185   | 6.19E-49  |
| Astrocytes        | 2.75    | 0.191   | 5.33E-47  |
| Microglia         | 2.74    | 0.197   | 5.61E-44  |
| Neurons           | 2.76    | 0.199   | 9.72E-44  |
| Endothelial cells | -2.1    | 0.158   | 2.61E-40  |
| Neurons           | 0.248   | 0.0315  | 3.46E-15  |
| Neurons           | -0.345  | 0.0429  | 8.84E-16  |
| Microglia         | -0.308  | 0.044   | 2.56E-12  |
| Neurons           | -0.471  | 0.0661  | 1.04E-12  |
| Astrocytes        | 1.08    | 0.0777  | 6.37E-44  |
| Microglia         | 0.149   | 0.0145  | 9.05E-25  |
| Astrocytes        | -0.172  | 0.021   | 2.60E-16  |
| Microglia         | -0.0431 | 0.00537 | 1.01E-15  |
| Microglia         | 1.19    | 0.0835  | 4.39E-46  |
| Neurons           | 0.954   | 0.0961  | 3.17E-23  |
| Microglia         | -2.13   | 0.125   | 4.15E-65  |
| Neurons           | -2.21   | 0.153   | 2.72E-47  |
| Endothelial cells | -2.25   | 0.243   | 2.06E-20  |
| Neurons           | -2.52   | 0.137   | 1.46E-75  |
| Microglia         | -1.9    | 0.137   | 9.82E-44  |
| Endothelial cells | -2.41   | 0.22    | 6.32E-28  |
| Neurons           | 0.185   | 0.00808 | 5.09E-116 |
| Endothelial cells | 0.186   | 0.0082  | 6.60E-114 |
| Astrocytes        | 0.186   | 0.00822 | 2.31E-113 |
| Microglia         | 0.186   | 0.00823 | 4.31E-113 |
| Oligodendroglia   | 0.186   | 0.00823 | 4.31E-113 |
| Astrocytes        | 0.458   | 0.0486  | 4.35E-21  |
| Neurons           | 1.49    | 0.111   | 4.41E-41  |
| Microglia         | 1.58    | 0.119   | 3.13E-40  |

|                   |        |         |          |
|-------------------|--------|---------|----------|
| Neurons           | 1.39   | 0.142   | 1.26E-22 |
| Microglia         | 1.34   | 0.153   | 1.98E-18 |
| Endothelial cells | 0.963  | 0.135   | 9.80E-13 |
| Neurons           | 0.136  | 0.0108  | 2.32E-36 |
| Endothelial cells | 0.282  | 0.0259  | 1.31E-27 |
| Oligodendroglia   | 0.382  | 0.0409  | 9.65E-21 |
| Astrocytes        | -0.696 | 0.0995  | 2.65E-12 |
| Endothelial cells | 0.135  | 0.0192  | 2.05E-12 |
| Endothelial cells | -6.46  | 0.548   | 4.48E-32 |
| Neurons           | -4.46  | 0.417   | 1.07E-26 |
| Microglia         | 3.55   | 0.525   | 1.36E-11 |
| Oligodendroglia   | 0.212  | 0.0268  | 2.56E-15 |
| Microglia         | 2.42   | 0.349   | 4.09E-12 |
| Astrocytes        | -0.177 | 0.0213  | 9.58E-17 |
| Endothelial cells | 0.89   | 0.119   | 7.49E-14 |
| Astrocytes        | 0.937  | 0.0963  | 2.25E-22 |
| Oligodendroglia   | 0.938  | 0.0966  | 2.73E-22 |
| Microglia         | 0.934  | 0.0963  | 3.05E-22 |
| Endothelial cells | 0.933  | 0.0965  | 4.11E-22 |
| Neurons           | 0.935  | 0.0968  | 4.50E-22 |
| Endothelial cells | -1.33  | 0.194   | 7.10E-12 |
| Endothelial cells | 0.845  | 0.127   | 2.86E-11 |
| Microglia         | -0.124 | 0.0153  | 5.29E-16 |
| Astrocytes        | -0.577 | 0.0721  | 1.22E-15 |
| Neurons           | -0.383 | 0.0503  | 2.65E-14 |
| Oligodendroglia   | 0.671  | 0.0763  | 1.44E-18 |
| Neurons           | -1.32  | 0.184   | 7.29E-13 |
| Oligodendroglia   | 2.16   | 0.228   | 2.70E-21 |
| Oligodendroglia   | -0.413 | 0.0396  | 1.82E-25 |
| Astrocytes        | 2.61   | 0.268   | 2.06E-22 |
| Microglia         | -0.115 | 0.0153  | 5.63E-14 |
| Astrocytes        | 5.11   | 0.494   | 4.45E-25 |
| Oligodendroglia   | 1.73   | 0.184   | 5.34E-21 |
| Endothelial cells | 0.0725 | 0.00899 | 7.35E-16 |
| Neurons           | 0.0405 | 0.00529 | 1.92E-14 |
| Neurons           | 0.472  | 0.0709  | 2.79E-11 |
| Oligodendroglia   | 0.567  | 0.0829  | 7.94E-12 |
| Endothelial cells | 1.32   | 0.155   | 1.65E-17 |
| Endothelial cells | -0.159 | 0.0224  | 1.26E-12 |

|                   |         |         |          |
|-------------------|---------|---------|----------|
| Endothelial cells | -0.0541 | 0.00777 | 3.34E-12 |
| Endothelial cells | 0.568   | 0.0845  | 1.79E-11 |
| Oligodendroglia   | 0.107   | 0.0132  | 5.23E-16 |
| Oligodendroglia   | 2.73    | 0.195   | 1.56E-44 |
| Endothelial cells | 5.14    | 0.37    | 7.09E-44 |
| Neurons           | 1.19    | 0.0924  | 5.93E-38 |
| Endothelial cells | 3.42    | 0.368   | 1.49E-20 |
| Oligodendroglia   | 1.81    | 0.197   | 4.01E-20 |
| Neurons           | 0.819   | 0.0925  | 8.44E-19 |
| Neurons           | 12.6    | 1.75    | 6.02E-13 |
| Endothelial cells | -4.4    | 0.658   | 2.28E-11 |
| Oligodendroglia   | -4.39   | 0.658   | 2.53E-11 |
| Microglia         | -0.894  | 0.0921  | 2.82E-22 |
| Neurons           | -1.07   | 0.156   | 6.94E-12 |
| Microglia         | -0.449  | 0.0614  | 2.62E-13 |
| Neurons           | 0.436   | 0.0624  | 2.80E-12 |
| Oligodendroglia   | 0.465   | 0.067   | 3.91E-12 |
| Neurons           | 0.165   | 0.0191  | 5.68E-18 |
| Endothelial cells | 0.243   | 0.0292  | 8.66E-17 |
| Oligodendroglia   | 1.11    | 0.138   | 8.73E-16 |
| Endothelial cells | 1.15    | 0.156   | 1.68E-13 |
| Endothelial cells | 0.198   | 0.0284  | 3.13E-12 |
| Endothelial cells | 1.24    | 0.181   | 7.34E-12 |
| Endothelial cells | 1.5     | 0.193   | 7.72E-15 |
| Endothelial cells | -0.613  | 0.0888  | 5.09E-12 |
| Endothelial cells | -0.937  | 0.103   | 9.28E-20 |
| Neurons           | -0.384  | 0.0506  | 3.23E-14 |
| Endothelial cells | 1.47    | 0.166   | 8.34E-19 |
| Neurons           | 0.669   | 0.0884  | 3.79E-14 |
| Microglia         | 1.34    | 0.197   | 1.03E-11 |
| Astrocytes        | 1.26    | 0.189   | 2.62E-11 |
| Microglia         | 0.821   | 0.0758  | 2.45E-27 |
| Neurons           | 0.762   | 0.0846  | 2.12E-19 |
| Astrocytes        | -1.87   | 0.166   | 1.95E-29 |
| Oligodendroglia   | -1.86   | 0.166   | 3.86E-29 |
| Microglia         | -1.87   | 0.167   | 4.19E-29 |
| Endothelial cells | -1.87   | 0.169   | 1.85E-28 |
| Neurons           | -1.81   | 0.167   | 2.27E-27 |
| Neurons           | -3.03   | 0.246   | 7.33E-35 |



|                   |         |         |          |
|-------------------|---------|---------|----------|
| Endothelial cells | -4.06   | 0.345   | 5.70E-32 |
| Microglia         | 1.07    | 0.152   | 1.93E-12 |
| Endothelial cells | -0.0801 | 0.00969 | 1.38E-16 |
| Oligodendroglia   | 0.161   | 0.0217  | 1.18E-13 |
| Astrocytes        | 0.311   | 0.0435  | 8.71E-13 |
| Endothelial cells | 1.04    | 0.152   | 7.80E-12 |
| Neurons           | -0.401  | 0.0594  | 1.47E-11 |
| Endothelial cells | -3.33   | 0.448   | 1.06E-13 |
| Endothelial cells | 2.43    | 0.266   | 6.52E-20 |
| Neurons           | 3.48    | 0.425   | 2.65E-16 |
| Oligodendroglia   | 6.11    | 0.76    | 9.02E-16 |
| Astrocytes        | -23.6   | 3.04    | 8.28E-15 |
| Microglia         | 0.504   | 0.0714  | 1.68E-12 |
| Microglia         | 0.0713  | 0.00956 | 8.77E-14 |
| Oligodendroglia   | 0.419   | 0.0567  | 1.47E-13 |
| Microglia         | -0.0901 | 0.0124  | 3.70E-13 |
| Microglia         | -0.214  | 0.032   | 2.27E-11 |
| Oligodendroglia   | -0.41   | 0.0616  | 2.82E-11 |
| Endothelial cells | 0.0872  | 0.0131  | 2.80E-11 |
| Neurons           | -0.0247 | 0.00315 | 4.46E-15 |
| Astrocytes        | -0.203  | 0.0294  | 5.03E-12 |
| Oligodendroglia   | 0.126   | 0.0184  | 7.50E-12 |
| Endothelial cells | 0.075   | 0.00648 | 5.58E-31 |
| Oligodendroglia   | -0.127  | 0.0164  | 9.64E-15 |
| Endothelial cells | -0.845  | 0.12    | 1.90E-12 |
| Endothelial cells | 0.33    | 0.0452  | 2.86E-13 |
| Microglia         | 0.398   | 0.0494  | 7.84E-16 |
| Endothelial cells | 0.106   | 0.0159  | 2.62E-11 |
| Endothelial cells | -1.35   | 0.177   | 2.40E-14 |
| Neurons           | -0.766  | 0.108   | 1.32E-12 |
| Oligodendroglia   | 0.757   | 0.0676  | 4.16E-29 |
| Microglia         | -0.118  | 0.0116  | 2.63E-24 |
| Neurons           | 0.0433  | 0.00529 | 2.72E-16 |
| Microglia         | 0.0294  | 0.00263 | 5.18E-29 |
| Astrocytes        | -0.104  | 0.0123  | 2.78E-17 |
| Neurons           | -0.065  | 0.00912 | 1.02E-12 |
| Oligodendroglia   | 0.149   | 0.0212  | 2.09E-12 |
| Astrocytes        | -0.171  | 0.0203  | 3.65E-17 |
| Microglia         | 0.484   | 0.0474  | 1.77E-24 |

|                   |        |        |          |
|-------------------|--------|--------|----------|
| Neurons           | 0.464  | 0.0483 | 7.50E-22 |
| Endothelial cells | 0.612  | 0.0808 | 3.61E-14 |
| Endothelial cells | 0.263  | 0.0385 | 8.42E-12 |
| Microglia         | 0.428  | 0.0295 | 1.07E-47 |
| Endothelial cells | 0.517  | 0.0464 | 7.81E-29 |
| Neurons           | 0.279  | 0.0263 | 2.72E-26 |
| Endothelial cells | 0.658  | 0.0891 | 1.52E-13 |
| Microglia         | 0.0847 | 0.0109 | 7.81E-15 |
| Astrocytes        | 0.664  | 0.0968 | 6.91E-12 |
| Neurons           | 0.612  | 0.0787 | 7.46E-15 |
| Endothelial cells | 0.922  | 0.134  | 5.96E-12 |
| Oligodendroglia   | 1.17   | 0.168  | 3.30E-12 |
| Endothelial cells | -2.7   | 0.318  | 2.06E-17 |
| Oligodendroglia   | -2.31  | 0.279  | 1.24E-16 |
| Astrocytes        | -2.39  | 0.317  | 4.72E-14 |
| Microglia         | -2.36  | 0.329  | 7.32E-13 |
| Neurons           | -2.4   | 0.339  | 1.45E-12 |
| Oligodendroglia   | -10.5  | 1.54   | 9.22E-12 |
| Oligodendroglia   | 1.19   | 0.174  | 7.97E-12 |
| Neurons           | 1.61   | 0.114  | 2.75E-45 |
| Microglia         | 1.41   | 0.103  | 1.18E-42 |
| Endothelial cells | 1.87   | 0.183  | 1.64E-24 |
| Endothelial cells | -0.867 | 0.111  | 5.68E-15 |
| Endothelial cells | -2.87  | 0.272  | 5.00E-26 |
| Neurons           | -2.86  | 0.279  | 1.17E-24 |
| Astrocytes        | -2.8   | 0.277  | 5.08E-24 |
| Microglia         | -2.73  | 0.28   | 1.84E-22 |
| Oligodendroglia   | -2.48  | 0.255  | 2.35E-22 |
| Endothelial cells | 0.554  | 0.0813 | 9.47E-12 |
| Neurons           | 0.374  | 0.033  | 8.97E-30 |
| Microglia         | 0.308  | 0.0348 | 8.71E-19 |
| Endothelial cells | 0.821  | 0.122  | 1.70E-11 |
| Endothelial cells | -1.15  | 0.17   | 1.34E-11 |
| Endothelial cells | 1.18   | 0.167  | 1.60E-12 |
| Neurons           | 2.08   | 0.156  | 1.48E-40 |
| Astrocytes        | -1.61  | 0.121  | 2.14E-40 |
| Oligodendroglia   | -1.61  | 0.121  | 2.14E-40 |
| Microglia         | -1.6   | 0.121  | 6.45E-40 |
| Endothelial cells | -1.58  | 0.122  | 2.32E-38 |

|                   |         |         |           |
|-------------------|---------|---------|-----------|
| Endothelial cells | 1.16    | 0.174   | 2.62E-11  |
| Microglia         | 0.489   | 0.0428  | 3.13E-30  |
| Neurons           | 0.49    | 0.0429  | 3.25E-30  |
| Neurons           | 0.108   | 0.0162  | 2.62E-11  |
| Endothelial cells | 0.272   | 0.0408  | 2.62E-11  |
| Endothelial cells | 6.95    | 0.929   | 7.37E-14  |
| Astrocytes        | -3.77   | 0.381   | 4.38E-23  |
| Microglia         | -3.75   | 0.403   | 1.34E-20  |
| Oligodendroglia   | -3.75   | 0.403   | 1.34E-20  |
| Endothelial cells | -3.63   | 0.405   | 3.16E-19  |
| Neurons           | -3.56   | 0.401   | 6.82E-19  |
| Endothelial cells | -0.625  | 0.0904  | 4.72E-12  |
| Neurons           | -0.407  | 0.0607  | 2.01E-11  |
| Endothelial cells | -0.177  | 0.00738 | 4.11E-127 |
| Astrocytes        | -0.176  | 0.00742 | 2.26E-124 |
| Microglia         | -0.176  | 0.00743 | 4.82E-124 |
| Neurons           | -0.176  | 0.00743 | 4.82E-124 |
| Oligodendroglia   | -0.176  | 0.00744 | 1.03E-123 |
| Neurons           | 0.411   | 0.0444  | 2.11E-20  |
| Microglia         | 0.37    | 0.0428  | 5.39E-18  |
| Astrocytes        | -0.375  | 0.0316  | 1.75E-32  |
| Microglia         | -0.0551 | 0.00627 | 1.52E-18  |
| Endothelial cells | -0.12   | 0.0157  | 2.12E-14  |
| Endothelial cells | 1.64    | 0.19    | 6.05E-18  |
| Neurons           | -0.434  | 0.0416  | 1.76E-25  |
| Microglia         | -0.392  | 0.0474  | 1.34E-16  |
| Endothelial cells | -0.552  | 0.0753  | 2.29E-13  |
| Microglia         | -0.238  | 0.0342  | 3.43E-12  |
| Microglia         | -0.186  | 0.0232  | 1.08E-15  |
| Oligodendroglia   | 0.578   | 0.0481  | 2.91E-33  |
| Microglia         | -0.139  | 0.0163  | 1.49E-17  |
| Microglia         | -0.213  | 0.0315  | 1.36E-11  |
| Endothelial cells | -0.865  | 0.125   | 4.52E-12  |
| Microglia         | -0.414  | 0.0587  | 1.75E-12  |
| Endothelial cells | 0.513   | 0.0687  | 8.19E-14  |
| Endothelial cells | -0.964  | 0.142   | 1.13E-11  |
| Endothelial cells | 0.147   | 0.0207  | 1.23E-12  |
| Astrocytes        | 0.204   | 0.0173  | 4.30E-32  |
| Oligodendroglia   | -0.0973 | 0.0129  | 4.61E-14  |

|                   |         |         |          |
|-------------------|---------|---------|----------|
| Endothelial cells | 1.52    | 0.222   | 7.55E-12 |
| Microglia         | -4.45   | 0.317   | 9.14E-45 |
| Oligodendroglia   | -4.44   | 0.321   | 1.64E-43 |
| Astrocytes        | -4.43   | 0.323   | 8.24E-43 |
| Neurons           | -4.41   | 0.326   | 1.07E-41 |
| Endothelial cells | -4.22   | 0.317   | 1.96E-40 |
| Endothelial cells | 0.621   | 0.0862  | 5.84E-13 |
| Astrocytes        | 1.75    | 0.157   | 7.45E-29 |
| Microglia         | 1.74    | 0.16    | 1.52E-27 |
| Oligodendroglia   | 1.74    | 0.162   | 6.55E-27 |
| Endothelial cells | 1.69    | 0.162   | 1.77E-25 |
| Neurons           | 1.7     | 0.163   | 1.82E-25 |
| Microglia         | -0.18   | 0.0242  | 1.02E-13 |
| Astrocytes        | -0.179  | 0.0241  | 1.11E-13 |
| Oligodendroglia   | -0.179  | 0.0242  | 1.40E-13 |
| Neurons           | -0.179  | 0.0244  | 2.20E-13 |
| Endothelial cells | -0.178  | 0.0244  | 2.98E-13 |
| Neurons           | -0.498  | 0.0301  | 1.74E-61 |
| Astrocytes        | 4.49    | 0.365   | 8.91E-35 |
| Microglia         | 0.237   | 0.0301  | 3.44E-15 |
| Endothelial cells | -0.526  | 0.0788  | 2.47E-11 |
| Endothelial cells | -0.0437 | 0.00564 | 9.32E-15 |
| Neurons           | 1.7     | 0.251   | 1.26E-11 |
| Oligodendroglia   | 0.572   | 0.0791  | 4.78E-13 |
| Oligodendroglia   | 3.55    | 0.528   | 1.77E-11 |
| Endothelial cells | -0.818  | 0.106   | 1.19E-14 |
| Neurons           | -0.461  | 0.0618  | 8.68E-14 |
| Oligodendroglia   | -4.87   | 0.663   | 2.05E-13 |
| Oligodendroglia   | 1.66    | 0.207   | 1.06E-15 |
| Endothelial cells | 0.497   | 0.0648  | 1.72E-14 |
| Neurons           | -2.39   | 0.288   | 1.05E-16 |
| Endothelial cells | -2.07   | 0.256   | 6.17E-16 |
| Astrocytes        | -8.58   | 1.12    | 1.85E-14 |
| Oligodendroglia   | -59.5   | 8.08    | 1.79E-13 |
| Microglia         | 1.07    | 0.091   | 6.41E-32 |
| Neurons           | 0.704   | 0.0907  | 8.37E-15 |
| Endothelial cells | 1.14    | 0.167   | 8.71E-12 |
| Oligodendroglia   | 2.25    | 0.327   | 5.95E-12 |
| Endothelial cells | -0.866  | 0.124   | 2.87E-12 |

|                   |        |         |          |
|-------------------|--------|---------|----------|
| Neurons           | -0.236 | 0.0341  | 4.49E-12 |
| Neurons           | 0.877  | 0.115   | 2.42E-14 |
| Endothelial cells | 1.08   | 0.161   | 1.97E-11 |
| Endothelial cells | 0.771  | 0.114   | 1.35E-11 |
| Neurons           | 0.412  | 0.0513  | 9.65E-16 |
| Endothelial cells | 1.39   | 0.141   | 6.32E-23 |
| Oligodendroglia   | 0.45   | 0.0645  | 3.02E-12 |
| Neurons           | -0.362 | 0.0421  | 8.07E-18 |
| Microglia         | -0.354 | 0.0418  | 2.48E-17 |
| Endothelial cells | 1.03   | 0.128   | 8.49E-16 |
| Neurons           | 0.444  | 0.0629  | 1.68E-12 |
| Endothelial cells | -3.92  | 0.33    | 1.53E-32 |
| Neurons           | -1.16  | 0.146   | 1.94E-15 |
| Astrocytes        | -2.4   | 0.188   | 2.54E-37 |
| Microglia         | -2.4   | 0.189   | 6.03E-37 |
| Oligodendroglia   | -2.4   | 0.189   | 6.03E-37 |
| Neurons           | -2.37  | 0.19    | 1.04E-35 |
| Endothelial cells | -2.35  | 0.19    | 3.87E-35 |
| Microglia         | 0.782  | 0.107   | 2.70E-13 |
| Neurons           | 0.799  | 0.11    | 3.77E-13 |
| Neurons           | 1.25   | 0.182   | 6.50E-12 |
| Neurons           | -0.483 | 0.0689  | 2.38E-12 |
| Neurons           | -0.272 | 0.0286  | 1.90E-21 |
| Neurons           | 0.308  | 0.0454  | 1.17E-11 |
| Microglia         | 0.532  | 0.0624  | 1.52E-17 |
| Microglia         | 0.546  | 0.08    | 8.79E-12 |
| Microglia         | -0.566 | 0.0445  | 4.63E-37 |
| Neurons           | -0.545 | 0.047   | 4.33E-31 |
| Endothelial cells | -0.62  | 0.0785  | 2.83E-15 |
| Microglia         | -35    | 4.64    | 4.59E-14 |
| Astrocytes        | -5.14  | 0.717   | 7.57E-13 |
| Oligodendroglia   | 3.77   | 0.541   | 3.20E-12 |
| Endothelial cells | -0.838 | 0.126   | 2.92E-11 |
| Endothelial cells | 0.729  | 0.104   | 2.39E-12 |
| Astrocytes        | -2.66  | 0.313   | 1.92E-17 |
| Endothelial cells | 1.14   | 0.144   | 2.44E-15 |
| Neurons           | 0.545  | 0.0805  | 1.29E-11 |
| Endothelial cells | 0.188  | 0.0146  | 6.09E-38 |
| Neurons           | 0.0722 | 0.00846 | 1.41E-17 |

|                   |         |         |          |
|-------------------|---------|---------|----------|
| Microglia         | 0.187   | 0.0221  | 2.64E-17 |
| Neurons           | 0.0322  | 0.00301 | 1.04E-26 |
| Oligodendroglia   | 0.0862  | 0.0127  | 1.14E-11 |
| Endothelial cells | -0.812  | 0.12    | 1.32E-11 |
| Neurons           | 0.863   | 0.129   | 2.23E-11 |
| Endothelial cells | 3.6     | 0.524   | 6.41E-12 |
| Astrocytes        | -16.9   | 2.47    | 7.80E-12 |
| Oligodendroglia   | -14     | 2.08    | 1.69E-11 |
| Endothelial cells | -0.787  | 0.118   | 2.57E-11 |
| Neurons           | -0.269  | 0.0268  | 1.04E-23 |
| Microglia         | -0.379  | 0.0322  | 5.56E-32 |
| Oligodendroglia   | -1.94   | 0.193   | 9.02E-24 |
| Neurons           | -0.102  | 0.0137  | 9.68E-14 |
| Endothelial cells | -0.342  | 0.0484  | 1.59E-12 |
| Neurons           | -0.676  | 0.0955  | 1.46E-12 |
| Microglia         | -0.135  | 0.0157  | 8.06E-18 |
| Microglia         | -0.094  | 0.0108  | 3.21E-18 |
| Astrocytes        | -0.0936 | 0.0108  | 4.45E-18 |
| Neurons           | -0.0935 | 0.0108  | 4.83E-18 |
| Oligodendroglia   | -0.0935 | 0.0108  | 4.83E-18 |
| Endothelial cells | -0.0922 | 0.0108  | 1.38E-17 |
| Astrocytes        | -0.343  | 0.0486  | 1.69E-12 |
| Microglia         | 0.0231  | 0.00326 | 1.38E-12 |
| Neurons           | 0.0262  | 0.00376 | 3.21E-12 |
| Oligodendroglia   | 0.0748  | 0.0109  | 6.77E-12 |
| Astrocytes        | 0.419   | 0.0604  | 4.00E-12 |
| Astrocytes        | 0.166   | 0.0233  | 1.04E-12 |
| Neurons           | -0.0721 | 0.00943 | 2.08E-14 |
| Neurons           | -0.0717 | 0.00949 | 4.18E-14 |
| Neurons           | -0.28   | 0.0348  | 8.56E-16 |
| Endothelial cells | -0.37   | 0.0553  | 2.22E-11 |
| Microglia         | -0.107  | 0.0139  | 1.38E-14 |
| Neurons           | -0.107  | 0.0139  | 1.38E-14 |
| Astrocytes        | -0.107  | 0.014   | 2.12E-14 |
| Endothelial cells | -0.107  | 0.014   | 2.12E-14 |
| Oligodendroglia   | -0.106  | 0.0139  | 2.42E-14 |
| Oligodendroglia   | -0.146  | 0.0184  | 2.11E-15 |
| Neurons           | -0.106  | 0.0151  | 2.22E-12 |
| Neurons           | -0.198  | 0.0238  | 8.85E-17 |

|                   |         |         |          |
|-------------------|---------|---------|----------|
| Astrocytes        | -0.523  | 0.0779  | 1.90E-11 |
| Oligodendroglia   | 0.301   | 0.0384  | 4.56E-15 |
| Microglia         | -0.0705 | 0.0105  | 1.89E-11 |
| Astrocytes        | -0.0701 | 0.0105  | 2.45E-11 |
| Neurons           | -0.0699 | 0.0105  | 2.79E-11 |
| Neurons           | -0.185  | 0.0213  | 3.77E-18 |
| Astrocytes        | -0.184  | 0.0213  | 5.70E-18 |
| Endothelial cells | -0.184  | 0.0213  | 5.70E-18 |
| Microglia         | -0.184  | 0.0213  | 5.70E-18 |
| Oligodendroglia   | -0.184  | 0.0213  | 5.70E-18 |
| Endothelial cells | -0.133  | 0.0183  | 3.65E-13 |
| Oligodendroglia   | -0.133  | 0.0183  | 3.65E-13 |
| Astrocytes        | -0.133  | 0.0184  | 4.89E-13 |
| Microglia         | -0.133  | 0.0184  | 4.89E-13 |
| Neurons           | -0.132  | 0.0183  | 5.47E-13 |
| Neurons           | 0.208   | 0.0182  | 3.01E-30 |
| Astrocytes        | 0.209   | 0.0183  | 3.29E-30 |
| Endothelial cells | 0.209   | 0.0183  | 3.29E-30 |
| Microglia         | 0.209   | 0.0183  | 3.29E-30 |
| Oligodendroglia   | 0.209   | 0.0183  | 3.29E-30 |
| Oligodendroglia   | 0.714   | 0.0895  | 1.49E-15 |
| Neurons           | -0.371  | 0.0529  | 2.33E-12 |
| Astrocytes        | -0.311  | 0.0446  | 3.10E-12 |
| Neurons           | 0.104   | 0.0106  | 1.01E-22 |
| Endothelial cells | -0.442  | 0.048   | 3.31E-20 |
| Oligodendroglia   | -1.16   | 0.137   | 2.51E-17 |
| Astrocytes        | -11.5   | 1.39    | 1.30E-16 |
| Microglia         | -0.0907 | 0.0112  | 5.58E-16 |
| Neurons           | -0.109  | 0.0119  | 5.21E-20 |
| Oligodendroglia   | -0.64   | 0.0739  | 4.70E-18 |
| Astrocytes        | 0.127   | 0.0158  | 9.13E-16 |
| Microglia         | 0.0282  | 0.00417 | 1.36E-11 |
| Astrocytes        | -0.0834 | 0.00977 | 1.39E-17 |
| Neurons           | -0.0833 | 0.00979 | 1.76E-17 |
| Microglia         | -0.083  | 0.00982 | 2.86E-17 |
| Endothelial cells | -0.0825 | 0.00985 | 5.49E-17 |
| Oligodendroglia   | -0.0819 | 0.0099  | 1.31E-16 |
| Microglia         | -0.147  | 0.0188  | 5.32E-15 |
| Neurons           | -0.137  | 0.0177  | 9.93E-15 |

|                   |         |         |          |
|-------------------|---------|---------|----------|
| Endothelial cells | -0.0939 | 0.0141  | 2.75E-11 |
| Endothelial cells | 0.197   | 0.0227  | 4.01E-18 |
| Astrocytes        | -0.123  | 0.0163  | 4.49E-14 |
| Microglia         | -0.122  | 0.0163  | 7.17E-14 |
| Oligodendroglia   | -0.122  | 0.0164  | 1.01E-13 |
| Neurons           | -0.12   | 0.0162  | 1.29E-13 |
| Endothelial cells | -0.0842 | 0.011   | 1.94E-14 |
| Oligodendroglia   | -0.084  | 0.011   | 2.23E-14 |
| Astrocytes        | -0.0835 | 0.011   | 3.18E-14 |
| Microglia         | -0.0835 | 0.011   | 3.18E-14 |
| Neurons           | -0.0834 | 0.011   | 3.41E-14 |
| Neurons           | 0.0378  | 0.00408 | 1.96E-20 |
| Oligodendroglia   | -0.445  | 0.0275  | 6.78E-59 |
| Microglia         | -0.0943 | 0.0084  | 3.03E-29 |
| Neurons           | 0.0224  | 0.00257 | 2.88E-18 |
| Neurons           | 0.0852  | 0.00537 | 1.09E-56 |
| Neurons           | 0.0195  | 0.00257 | 3.26E-14 |
| Endothelial cells | -0.124  | 0.00908 | 1.85E-42 |
| Neurons           | -0.124  | 0.00912 | 4.20E-42 |
| Oligodendroglia   | -0.124  | 0.00912 | 4.20E-42 |
| Microglia         | -0.124  | 0.00913 | 5.15E-42 |
| Astrocytes        | -0.124  | 0.00915 | 7.72E-42 |
| Neurons           | 0.0226  | 0.0032  | 1.64E-12 |
| Endothelial cells | 0.0824  | 0.00941 | 2.01E-18 |
| Neurons           | 0.0442  | 0.00606 | 3.01E-13 |
| Endothelial cells | 5.38    | 0.47    | 2.44E-30 |
| Neurons           | -1.46   | 0.163   | 3.33E-19 |
| Astrocytes        | 64.9    | 9.56    | 1.13E-11 |
| Neurons           | -0.332  | 0.038   | 2.40E-18 |
| Endothelial cells | 1.91    | 0.203   | 5.02E-21 |
| Neurons           | 0.356   | 0.0525  | 1.19E-11 |
| Endothelial cells | 0.829   | 0.0785  | 4.54E-26 |
| Microglia         | 0.529   | 0.0508  | 2.15E-25 |
| Astrocytes        | 1.74    | 0.232   | 6.38E-14 |
| Oligodendroglia   | 1.02    | 0.143   | 9.83E-13 |
| Endothelial cells | -3.3    | 0.446   | 1.37E-13 |
| Endothelial cells | -0.67   | 0.0996  | 1.73E-11 |
| Oligodendroglia   | 2.23    | 0.242   | 3.12E-20 |
| Microglia         | -0.604  | 0.0849  | 1.13E-12 |



|                   |         |         |          |
|-------------------|---------|---------|----------|
| Neurons           | 2.71    | 0.394   | 6.06E-12 |
| Endothelial cells | 2.15    | 0.32    | 1.83E-11 |
| Endothelial cells | 0.882   | 0.127   | 3.79E-12 |
| Endothelial cells | 1.07    | 0.153   | 2.68E-12 |
| Endothelial cells | -0.67   | 0.0967  | 4.25E-12 |
| Oligodendroglia   | 2.28    | 0.231   | 5.61E-23 |
| Microglia         | -0.573  | 0.0819  | 2.63E-12 |
| Endothelial cells | -0.818  | 0.116   | 1.77E-12 |
| Neurons           | 0.586   | 0.0704  | 8.51E-17 |
| Endothelial cells | 0.763   | 0.114   | 2.19E-11 |
| Endothelial cells | -0.964  | 0.142   | 1.13E-11 |
| Oligodendroglia   | -2.43   | 0.254   | 1.10E-21 |
| Astrocytes        | 15.6    | 1.7     | 4.45E-20 |
| Microglia         | -0.659  | 0.0955  | 5.18E-12 |
| Astrocytes        | -1.2    | 0.175   | 7.03E-12 |
| Oligodendroglia   | -1.24   | 0.182   | 9.55E-12 |
| Oligodendroglia   | 0.229   | 0.0328  | 2.92E-12 |
| Astrocytes        | 0.915   | 0.0637  | 8.68E-47 |
| Endothelial cells | 0.877   | 0.115   | 2.42E-14 |
| Neurons           | 0.416   | 0.061   | 9.12E-12 |
| Neurons           | 0.602   | 0.0594  | 3.88E-24 |
| Microglia         | 0.466   | 0.0617  | 4.26E-14 |
| Neurons           | 1.06    | 0.146   | 3.86E-13 |
| Endothelial cells | -0.272  | 0.0374  | 3.52E-13 |
| Microglia         | -0.172  | 0.0244  | 1.80E-12 |
| Endothelial cells | -0.0995 | 0.0134  | 1.12E-13 |
| Oligodendroglia   | -0.0991 | 0.0134  | 1.41E-13 |
| Neurons           | -0.0983 | 0.0133  | 1.46E-13 |
| Microglia         | -0.099  | 0.0134  | 1.49E-13 |
| Astrocytes        | -0.0989 | 0.0134  | 1.58E-13 |
| Endothelial cells | -0.566  | 0.0723  | 4.94E-15 |
| Microglia         | 0.338   | 0.0445  | 3.07E-14 |
| Neurons           | -0.319  | 0.0454  | 2.12E-12 |
| Oligodendroglia   | 0.896   | 0.132   | 1.14E-11 |
| Endothelial cells | -1.48   | 0.214   | 4.65E-12 |
| Neurons           | 0.402   | 0.0604  | 2.82E-11 |
| Neurons           | -0.0948 | 0.00701 | 1.14E-41 |
| Neurons           | -0.112  | 0.00795 | 4.50E-45 |
| Microglia         | -0.107  | 0.0113  | 2.82E-21 |

|                   |         |         |          |
|-------------------|---------|---------|----------|
| Endothelial cells | -0.164  | 0.0232  | 1.56E-12 |
| Oligodendroglia   | -0.22   | 0.0312  | 1.77E-12 |
| Microglia         | 0.203   | 0.0267  | 2.89E-14 |
| Microglia         | 0.322   | 0.0458  | 2.06E-12 |
| Endothelial cells | 0.0706  | 0.0101  | 2.75E-12 |
| Neurons           | -0.0298 | 0.00286 | 2.02E-25 |
| Endothelial cells | 1.59    | 0.227   | 2.48E-12 |
| Endothelial cells | 1.89    | 0.277   | 8.91E-12 |
| Astrocytes        | 2.22    | 0.16    | 8.98E-44 |
| Oligodendroglia   | -3.51   | 0.272   | 4.25E-38 |
| Neurons           | -4.02   | 0.313   | 9.36E-38 |
| Endothelial cells | 0.569   | 0.0472  | 1.82E-33 |
| Microglia         | 2.45    | 0.215   | 4.41E-30 |
| Endothelial cells | -0.538  | 0.0511  | 6.39E-26 |
| Oligodendroglia   | -0.526  | 0.0503  | 1.36E-25 |
| Microglia         | -0.529  | 0.0507  | 1.74E-25 |
| Astrocytes        | -0.528  | 0.0507  | 2.14E-25 |
| Neurons           | -0.516  | 0.051   | 4.61E-24 |
| Astrocytes        | -2      | 0.254   | 3.43E-15 |
| Endothelial cells | -0.565  | 0.0793  | 1.04E-12 |
| Endothelial cells | 1.66    | 0.178   | 1.10E-20 |
| Neurons           | -0.598  | 0.0898  | 2.75E-11 |
| Neurons           | 0.902   | 0.114   | 2.53E-15 |
| Endothelial cells | 0.98    | 0.138   | 1.23E-12 |
| Oligodendroglia   | 3.7     | 0.359   | 6.59E-25 |
| Endothelial cells | -0.839  | 0.104   | 7.19E-16 |
| Endothelial cells | 1.23    | 0.125   | 7.57E-23 |
| Neurons           | 0.685   | 0.0735  | 1.17E-20 |
| Endothelial cells | 0.779   | 0.105   | 1.18E-13 |
| Endothelial cells | 0.901   | 0.109   | 1.38E-16 |
| Neurons           | 0.746   | 0.0778  | 8.92E-22 |
| Endothelial cells | 1.04    | 0.111   | 7.30E-21 |
| Endothelial cells | -0.647  | 0.0892  | 4.07E-13 |
| Neurons           | -0.444  | 0.0658  | 1.50E-11 |
| Neurons           | 2.76    | 0.291   | 2.43E-21 |
| Endothelial cells | 2.73    | 0.293   | 1.19E-20 |
| Oligodendroglia   | 2.6     | 0.291   | 4.08E-19 |
| Astrocytes        | 2.61    | 0.293   | 5.20E-19 |
| Microglia         | 2.6     | 0.292   | 5.38E-19 |

|                   |         |         |          |
|-------------------|---------|---------|----------|
| Endothelial cells | 0.848   | 0.127   | 2.44E-11 |
| Astrocytes        | 1.53    | 0.159   | 6.42E-22 |
| Endothelial cells | 1.6     | 0.177   | 1.57E-19 |
| Oligodendroglia   | 1.5     | 0.173   | 4.30E-18 |
| Microglia         | 1.51    | 0.177   | 1.45E-17 |
| Neurons           | 1.47    | 0.179   | 2.17E-16 |
| Endothelial cells | -0.855  | 0.119   | 6.73E-13 |
| Oligodendroglia   | -0.0389 | 0.00569 | 8.11E-12 |
| Astrocytes        | 1.41    | 0.161   | 1.99E-18 |
| Neurons           | 1.41    | 0.161   | 1.99E-18 |
| Microglia         | 1.39    | 0.16    | 3.71E-18 |
| Endothelial cells | 1.37    | 0.158   | 4.29E-18 |
| Oligodendroglia   | 1.34    | 0.161   | 8.58E-17 |
| Endothelial cells | 0.432   | 0.0642  | 1.71E-11 |
| Endothelial cells | 1.12    | 0.138   | 4.82E-16 |
| Endothelial cells | 0.165   | 0.0166  | 2.80E-23 |
| Oligodendroglia   | 3.04    | 0.397   | 1.90E-14 |
| Microglia         | -0.577  | 0.0668  | 5.73E-18 |
| Neurons           | -0.485  | 0.0579  | 5.45E-17 |
| Endothelial cells | -0.734  | 0.109   | 1.65E-11 |
| Microglia         | -0.225  | 0.031   | 3.93E-13 |
| Microglia         | 0.288   | 0.0429  | 1.90E-11 |
| Microglia         | -0.519  | 0.0479  | 2.35E-27 |
| Endothelial cells | -0.524  | 0.0776  | 1.45E-11 |
| Endothelial cells | 1       | 0.145   | 5.33E-12 |
| Neurons           | 0.078   | 0.00522 | 1.74E-50 |
| Endothelial cells | 0.112   | 0.00774 | 1.87E-47 |
| Endothelial cells | 0.887   | 0.127   | 2.86E-12 |
| Neurons           | -2.36   | 0.178   | 4.03E-40 |
| Oligodendroglia   | 4.35    | 0.526   | 1.34E-16 |
| Endothelial cells | 1.34    | 0.187   | 7.73E-13 |
| Endothelial cells | 0.204   | 0.0261  | 5.45E-15 |
| Astrocytes        | -1.66   | 0.164   | 4.42E-24 |
| Microglia         | -1.65   | 0.165   | 1.52E-23 |
| Oligodendroglia   | -1.65   | 0.165   | 1.52E-23 |
| Neurons           | -1.64   | 0.167   | 9.20E-23 |
| Endothelial cells | -1.62   | 0.167   | 3.00E-22 |
| Endothelial cells | -0.934  | 0.135   | 4.56E-12 |
| Microglia         | 0.681   | 0.072   | 3.13E-21 |

|                   |         |         |          |
|-------------------|---------|---------|----------|
| Endothelial cells | 0.856   | 0.123   | 3.42E-12 |
| Astrocytes        | 0.214   | 0.0176  | 5.13E-34 |
| Microglia         | 0.0358  | 0.00375 | 1.34E-21 |
| Neurons           | -0.365  | 0.0418  | 2.50E-18 |
| Neurons           | 0.819   | 0.112   | 2.62E-13 |
| Endothelial cells | 1.26    | 0.173   | 3.26E-13 |
| Oligodendroglia   | -4.38   | 0.654   | 2.12E-11 |
| Neurons           | -2.28   | 0.263   | 4.35E-18 |
| Oligodendroglia   | 0.243   | 0.0241  | 6.57E-24 |
| Endothelial cells | 0.0643  | 0.00789 | 3.65E-16 |
| Astrocytes        | 0.354   | 0.0478  | 1.30E-13 |
| Astrocytes        | -0.15   | 0.0209  | 7.12E-13 |
| Astrocytes        | -0.211  | 0.0284  | 1.09E-13 |
| Microglia         | -0.286  | 0.0413  | 4.36E-12 |
| Astrocytes        | 0.166   | 0.0206  | 7.74E-16 |
| Endothelial cells | -0.0506 | 0.00756 | 2.18E-11 |
| Neurons           | 0.0529  | 0.00514 | 7.67E-25 |
| Microglia         | -0.533  | 0.0687  | 8.60E-15 |
| Astrocytes        | -8.58   | 1.22    | 2.02E-12 |
| Astrocytes        | -0.285  | 0.036   | 2.44E-15 |
| Endothelial cells | 0.804   | 0.105   | 1.90E-14 |
| Endothelial cells | 0.74    | 0.108   | 7.29E-12 |
| Neurons           | 0.372   | 0.0544  | 8.02E-12 |
| Endothelial cells | 3.7     | 0.384   | 5.67E-22 |
| Neurons           | 1.49    | 0.198   | 5.26E-14 |
| Endothelial cells | 2.56    | 0.321   | 1.52E-15 |
| Neurons           | -0.798  | 0.0909  | 1.65E-18 |
| Endothelial cells | -1.21   | 0.167   | 4.31E-13 |
| Endothelial cells | -3.99   | 0.501   | 1.66E-15 |
| Endothelial cells | -1.48   | 0.165   | 2.97E-19 |
| Neurons           | -0.726  | 0.0939  | 1.06E-14 |
| Neurons           | 2.68    | 0.265   | 4.83E-24 |
| Endothelial cells | -1.2    | 0.136   | 1.11E-18 |
| Neurons           | -2.3    | 0.114   | 1.61E-90 |
| Microglia         | -2.37   | 0.137   | 4.76E-67 |
| Endothelial cells | -1.45   | 0.201   | 5.44E-13 |
| Endothelial cells | 2.06    | 0.297   | 4.03E-12 |
| Neurons           | -0.719  | 0.108   | 2.79E-11 |
| Microglia         | -0.598  | 0.0824  | 3.95E-13 |

|                   |        |        |          |
|-------------------|--------|--------|----------|
| Oligodendroglia   | -1.91  | 0.198  | 5.09E-22 |
| Neurons           | -1.93  | 0.201  | 7.84E-22 |
| Astrocytes        | -1.91  | 0.199  | 8.15E-22 |
| Microglia         | -1.91  | 0.199  | 8.15E-22 |
| Endothelial cells | -1.87  | 0.201  | 1.36E-20 |
| Endothelial cells | -0.685 | 0.0889 | 1.31E-14 |
| Endothelial cells | 1.51   | 0.206  | 2.30E-13 |
| Microglia         | -0.408 | 0.0479 | 1.63E-17 |
| Neurons           | -0.436 | 0.0537 | 4.69E-16 |
| Oligodendroglia   | 5.66   | 0.461  | 1.19E-34 |
| Microglia         | -1.26  | 0.164  | 1.55E-14 |
| Oligodendroglia   | 4.3    | 0.335  | 1.03E-37 |
| Microglia         | -1.18  | 0.11   | 7.58E-27 |
| Astrocytes        | -4.14  | 0.598  | 4.42E-12 |
| Oligodendroglia   | 2.48   | 0.214  | 4.70E-31 |
| Microglia         | -0.689 | 0.0725 | 2.03E-21 |
| Endothelial cells | 0.978  | 0.124  | 3.09E-15 |
| Neurons           | 0.618  | 0.0877 | 1.83E-12 |
| Oligodendroglia   | 1.32   | 0.177  | 8.81E-14 |
| Microglia         | 0.573  | 0.0802 | 9.02E-13 |
| Endothelial cells | -2.33  | 0.3    | 8.06E-15 |
| Neurons           | 0.493  | 0.0721 | 8.05E-12 |
| Endothelial cells | 0.978  | 0.122  | 1.09E-15 |
| Neurons           | -0.655 | 0.0966 | 1.20E-11 |
| Neurons           | 0.544  | 0.0562 | 3.68E-22 |
| Microglia         | 0.519  | 0.0607 | 1.23E-17 |
| Endothelial cells | -1.23  | 0.151  | 3.77E-16 |
| Neurons           | -0.639 | 0.0861 | 1.16E-13 |
| Neurons           | -0.568 | 0.0761 | 8.40E-14 |
| Endothelial cells | -0.916 | 0.136  | 1.64E-11 |
| Endothelial cells | 2.39   | 0.343  | 3.22E-12 |
| Neurons           | 1.72   | 0.249  | 4.93E-12 |
| Endothelial cells | -1.1   | 0.135  | 3.70E-16 |
| Neurons           | -0.58  | 0.0808 | 7.06E-13 |
| Microglia         | -0.459 | 0.0433 | 2.97E-26 |
| Neurons           | -0.422 | 0.0429 | 7.81E-23 |
| Neurons           | 0.392  | 0.0538 | 3.19E-13 |
| Neurons           | 0.473  | 0.0493 | 8.45E-22 |
| Microglia         | 0.377  | 0.0566 | 2.72E-11 |

|                   |         |         |          |
|-------------------|---------|---------|----------|
| Endothelial cells | -0.0898 | 0.00731 | 1.10E-34 |
| Oligodendroglia   | 0.127   | 0.0154  | 1.63E-16 |
| Microglia         | -0.0329 | 0.00473 | 3.51E-12 |
| Oligodendroglia   | 13.6    | 1.27    | 9.27E-27 |
| Microglia         | 2.77    | 0.269   | 7.24E-25 |
| Astrocytes        | 13.5    | 1.45    | 1.27E-20 |
| Endothelial cells | 4.16    | 0.579   | 6.73E-13 |
| Neurons           | -2.33   | 0.334   | 3.04E-12 |
| Oligodendroglia   | -0.514  | 0.0506  | 3.05E-24 |
| Oligodendroglia   | -30     | 4.31    | 3.39E-12 |
| Astrocytes        | -32.7   | 4.71    | 3.85E-12 |
| Endothelial cells | 4.98    | 0.738   | 1.50E-11 |
| Neurons           | 4.61    | 0.688   | 2.08E-11 |
| Neurons           | 1.05    | 0.145   | 4.44E-13 |
| Endothelial cells | 0.735   | 0.108   | 1.01E-11 |
| Endothelial cells | -0.816  | 0.109   | 7.09E-14 |
| Oligodendroglia   | -0.872  | 0.101   | 5.94E-18 |
| Endothelial cells | 0.382   | 0.0519  | 1.83E-13 |
| Neurons           | 0.206   | 0.0295  | 2.89E-12 |
| Neurons           | 0.418   | 0.0617  | 1.25E-11 |
| Microglia         | -0.631  | 0.0789  | 1.27E-15 |
| Microglia         | -2.32   | 0.212   | 7.15E-28 |
| Neurons           | 3.06    | 0.315   | 2.62E-22 |
| Astrocytes        | -2.28   | 0.235   | 2.95E-22 |
| Oligodendroglia   | -2.29   | 0.239   | 9.56E-22 |
| Endothelial cells | -2.19   | 0.239   | 5.04E-20 |
| Endothelial cells | 1.03    | 0.142   | 4.06E-13 |
| Endothelial cells | -1.17   | 0.156   | 6.38E-14 |
| Neurons           | -0.841  | 0.116   | 4.17E-13 |
| Endothelial cells | -4.02   | 0.425   | 3.11E-21 |
| Astrocytes        | 23.5    | 2.7     | 3.21E-18 |
| Oligodendroglia   | 5.62    | 0.65    | 5.33E-18 |
| Neurons           | -0.657  | 0.0917  | 7.80E-13 |
| Endothelial cells | -0.895  | 0.129   | 3.98E-12 |
| Neurons           | -2.23   | 0.253   | 1.21E-18 |
| Oligodendroglia   | -2.18   | 0.25    | 2.78E-18 |
| Endothelial cells | -2.21   | 0.254   | 3.30E-18 |
| Microglia         | -2.16   | 0.252   | 1.02E-17 |
| Astrocytes        | -2.14   | 0.252   | 2.03E-17 |

|                   |        |          |          |
|-------------------|--------|----------|----------|
| Microglia         | 0.251  | 0.0271   | 2.01E-20 |
| Astrocytes        | -0.232 | 0.0176   | 1.12E-39 |
| Endothelial cells | 0.151  | 0.014    | 4.02E-27 |
| Oligodendroglia   | -0.174 | 0.019    | 5.29E-20 |
| Neurons           | 0.0832 | 0.00909  | 5.54E-20 |
| Neurons           | -4.42  | 0.617    | 7.85E-13 |
| Neurons           | 0.0302 | 0.00401  | 5.03E-14 |
| Neurons           | 0.0032 | 0.000429 | 8.70E-14 |
| Endothelial cells | -0.506 | 0.0561   | 1.89E-19 |
| Endothelial cells | 0.921  | 0.1      | 3.26E-20 |
| Neurons           | 0.484  | 0.0675   | 7.48E-13 |
| Microglia         | 0.257  | 0.0381   | 1.53E-11 |
| Endothelial cells | 1.62   | 0.234    | 4.42E-12 |
| Neurons           | -3.54  | 0.389    | 9.01E-20 |
| Endothelial cells | -5.96  | 0.694    | 8.86E-18 |
| Microglia         | 5.62   | 0.786    | 8.67E-13 |
| Endothelial cells | 0.0907 | 0.0126   | 6.09E-13 |
| Neurons           | 0.513  | 0.0541   | 2.48E-21 |
| Microglia         | 0.425  | 0.0504   | 3.38E-17 |
| Endothelial cells | 0.931  | 0.132    | 1.75E-12 |
| Neurons           | 0.376  | 0.0549   | 7.45E-12 |
| Neurons           | -0.722 | 0.101    | 8.77E-13 |
| Endothelial cells | 0.616  | 0.0888   | 4.01E-12 |
| Neurons           | -0.474 | 0.0687   | 5.22E-12 |
| Microglia         | 0.274  | 0.0275   | 2.20E-23 |
| Neurons           | 0.248  | 0.0271   | 5.63E-20 |
| Endothelial cells | -0.729 | 0.105    | 3.84E-12 |
| Neurons           | -0.499 | 0.0553   | 1.82E-19 |
| Microglia         | -0.488 | 0.0602   | 5.22E-16 |
| Endothelial cells | -1.29  | 0.178    | 4.26E-13 |
| Endothelial cells | -2.08  | 0.275    | 3.92E-14 |
| Microglia         | -0.32  | 0.0466   | 6.56E-12 |
| Endothelial cells | 0.981  | 0.138    | 1.17E-12 |
| Endothelial cells | 0.863  | 0.124    | 3.41E-12 |
| Endothelial cells | 0.23   | 0.0289   | 1.74E-15 |
| Astrocytes        | 0.23   | 0.032    | 6.60E-13 |
| Oligodendroglia   | 0.453  | 0.0666   | 1.03E-11 |
| Oligodendroglia   | -0.2   | 0.0239   | 5.85E-17 |
| Endothelial cells | -0.069 | 0.00969  | 1.07E-12 |

|                   |         |         |          |
|-------------------|---------|---------|----------|
| Neurons           | -0.069  | 0.0097  | 1.13E-12 |
| Astrocytes        | -0.0688 | 0.00969 | 1.25E-12 |
| Microglia         | -0.0687 | 0.0097  | 1.42E-12 |
| Endothelial cells | 0.864   | 0.108   | 1.24E-15 |
| Endothelial cells | 0.734   | 0.0922  | 1.71E-15 |
| Neurons           | 0.337   | 0.0503  | 2.09E-11 |
| Oligodendroglia   | -1.68   | 0.198   | 2.16E-17 |
| Microglia         | -1.65   | 0.222   | 1.07E-13 |
| Astrocytes        | -1.65   | 0.226   | 2.86E-13 |
| Neurons           | 2.08    | 0.293   | 1.26E-12 |
| Endothelial cells | 4.49    | 0.67    | 2.06E-11 |
| Neurons           | 1.34    | 0.161   | 8.58E-17 |
| Neurons           | 0.386   | 0.0579  | 2.62E-11 |
| Neurons           | -0.458  | 0.0601  | 2.52E-14 |
| Endothelial cells | 0.252   | 0.0314  | 1.01E-15 |
| Neurons           | 0.125   | 0.0179  | 2.88E-12 |
| Astrocytes        | 0.325   | 0.0479  | 1.16E-11 |
| Neurons           | 0.0277  | 0.00349 | 2.07E-15 |
| Microglia         | 1.02    | 0.119   | 1.02E-17 |
| Neurons           | 0.921   | 0.117   | 3.50E-15 |
| Neurons           | -0.63   | 0.0783  | 8.56E-16 |
| Neurons           | -0.347  | 0.0505  | 6.36E-12 |
| Neurons           | -0.441  | 0.0476  | 1.96E-20 |
| Endothelial cells | 0.727   | 0.096   | 3.65E-14 |
| Neurons           | 0.0383  | 0.00402 | 1.61E-21 |
| Neurons           | -2.11   | 0.185   | 3.93E-30 |
| Endothelial cells | -3.06   | 0.278   | 3.53E-28 |
| Microglia         | -14.9   | 1.66    | 2.81E-19 |
| Oligodendroglia   | -1390   | 163     | 1.49E-17 |
| Astrocytes        | 89.9    | 10.7    | 4.39E-17 |
| Endothelial cells | 1.18    | 0.141   | 5.82E-17 |
| Neurons           | 0.602   | 0.0803  | 6.54E-14 |
| Oligodendroglia   | 0.512   | 0.0715  | 8.02E-13 |
| Neurons           | 1.73    | 0.219   | 2.80E-15 |
| Endothelial cells | 1.68    | 0.221   | 2.92E-14 |
| Astrocytes        | 1.63    | 0.218   | 7.60E-14 |
| Oligodendroglia   | 1.62    | 0.217   | 8.30E-14 |
| Microglia         | 1.63    | 0.22    | 1.27E-13 |
| Endothelial cells | -0.882  | 0.13    | 1.16E-11 |



|                   |         |         |           |
|-------------------|---------|---------|-----------|
| Endothelial cells | 0.874   | 0.0932  | 6.74E-21  |
| Neurons           | 0.412   | 0.0565  | 3.05E-13  |
| Neurons           | -0.15   | 0.012   | 7.47E-36  |
| Astrocytes        | -0.747  | 0.0707  | 4.29E-26  |
| Microglia         | -0.15   | 0.0173  | 4.30E-18  |
| Endothelial cells | 0.127   | 0.0168  | 4.05E-14  |
| Neurons           | -0.72   | 0.0828  | 3.45E-18  |
| Endothelial cells | -1.1    | 0.143   | 1.45E-14  |
| Endothelial cells | 0.142   | 0.0186  | 2.27E-14  |
| Microglia         | -0.285  | 0.0384  | 1.15E-13  |
| Endothelial cells | -0.44   | 0.0638  | 5.33E-12  |
| Oligodendroglia   | -0.101  | 0.00823 | 1.28E-34  |
| Microglia         | 0.0271  | 0.00274 | 4.58E-23  |
| Endothelial cells | 0.162   | 0.0219  | 1.39E-13  |
| Neurons           | 0.71    | 0.0895  | 2.14E-15  |
| Oligodendroglia   | -1.4    | 0.0916  | 9.80E-53  |
| Microglia         | -1.41   | 0.0925  | 1.83E-52  |
| Astrocytes        | -1.4    | 0.092   | 2.71E-52  |
| Endothelial cells | -1.4    | 0.092   | 2.71E-52  |
| Neurons           | -1.4    | 0.0923  | 5.77E-52  |
| Oligodendroglia   | -1.33   | 0.131   | 3.22E-24  |
| Oligodendroglia   | 4.34    | 0.572   | 3.26E-14  |
| Oligodendroglia   | 3.68    | 0.346   | 2.03E-26  |
| Oligodendroglia   | 0.174   | 0.0249  | 2.79E-12  |
| Oligodendroglia   | 1.48    | 0.205   | 5.22E-13  |
| Oligodendroglia   | 1.01    | 0.125   | 6.48E-16  |
| Microglia         | 0.0482  | 0.00705 | 8.09E-12  |
| Neurons           | -2.76   | 0.388   | 1.13E-12  |
| Microglia         | -2.45   | 0.358   | 7.72E-12  |
| Endothelial cells | -1.45   | 0.176   | 1.74E-16  |
| Neurons           | -0.66   | 0.0953  | 4.34E-12  |
| Neurons           | -0.468  | 0.0653  | 7.67E-13  |
| Endothelial cells | -0.673  | 0.0944  | 1.01E-12  |
| Endothelial cells | 1.08    | 0.16    | 1.48E-11  |
| Microglia         | -0.0685 | 0.00993 | 5.26E-12  |
| Oligodendroglia   | 0.237   | 0.0323  | 2.18E-13  |
| Astrocytes        | 5.84    | 0.214   | 5.62E-164 |
| Microglia         | 0.205   | 0.0132  | 2.16E-54  |
| Endothelial cells | 0.299   | 0.0232  | 5.26E-38  |

|                   |         |         |          |
|-------------------|---------|---------|----------|
| Oligodendroglia   | -0.622  | 0.0718  | 4.60E-18 |
| Neurons           | 0.0298  | 0.00377 | 2.69E-15 |
| Endothelial cells | 0.707   | 0.0954  | 1.25E-13 |
| Neurons           | 0.372   | 0.0528  | 1.85E-12 |
| Astrocytes        | 0.371   | 0.0497  | 8.34E-14 |
| Microglia         | 0.0833  | 0.0113  | 1.68E-13 |
| Endothelial cells | 1.03    | 0.155   | 3.03E-11 |
| Microglia         | -0.175  | 0.0229  | 2.14E-14 |
| Neurons           | -0.494  | 0.0727  | 1.08E-11 |
| Microglia         | 0.624   | 0.0838  | 9.60E-14 |
| Neurons           | -0.409  | 0.0597  | 7.34E-12 |
| Endothelial cells | 0.629   | 0.0857  | 2.14E-13 |
| Endothelial cells | 0.93    | 0.138   | 1.59E-11 |
| Endothelial cells | 1.6     | 0.222   | 5.71E-13 |
| Neurons           | 0.696   | 0.0998  | 3.08E-12 |
| Oligodendroglia   | 4.48    | 0.377   | 1.45E-32 |
| Microglia         | -0.986  | 0.136   | 4.17E-13 |
| Endothelial cells | -0.106  | 0.015   | 1.59E-12 |
| Microglia         | -0.105  | 0.015   | 2.56E-12 |
| Oligodendroglia   | -0.105  | 0.015   | 2.56E-12 |
| Astrocytes        | -0.104  | 0.015   | 4.11E-12 |
| Neurons           | -0.104  | 0.015   | 4.11E-12 |
| Endothelial cells | 1.61    | 0.187   | 7.33E-18 |
| Neurons           | 0.547   | 0.0784  | 3.01E-12 |
| Oligodendroglia   | 0.454   | 0.0456  | 2.37E-23 |
| Neurons           | -0.152  | 0.0161  | 3.69E-21 |
| Astrocytes        | -0.0958 | 0.0134  | 8.73E-13 |
| Endothelial cells | -0.0965 | 0.0135  | 8.80E-13 |
| Oligodendroglia   | -0.0961 | 0.0135  | 1.09E-12 |
| Microglia         | -0.0955 | 0.0135  | 1.50E-12 |
| Neurons           | -0.0947 | 0.0135  | 2.30E-12 |
| Microglia         | 0.366   | 0.0414  | 9.52E-19 |
| Neurons           | 0.302   | 0.0411  | 2.01E-13 |
| Neurons           | 0.0333  | 0.0047  | 1.39E-12 |
| Microglia         | -1.45   | 0.165   | 1.52E-18 |
| Oligodendroglia   | -1.45   | 0.172   | 3.45E-17 |
| Astrocytes        | -1.43   | 0.173   | 1.39E-16 |
| Neurons           | -1.42   | 0.182   | 6.08E-15 |
| Endothelial cells | -1.19   | 0.16    | 1.03E-13 |

|                   |         |         |           |
|-------------------|---------|---------|-----------|
| Oligodendroglia   | -1.4    | 0.137   | 1.63E-24  |
| Endothelial cells | -1.15   | 0.135   | 1.62E-17  |
| Microglia         | -0.589  | 0.0779  | 4.00E-14  |
| Neurons           | -0.56   | 0.079   | 1.35E-12  |
| Endothelial cells | 1.38    | 0.182   | 3.39E-14  |
| Neurons           | 0.751   | 0.106   | 1.39E-12  |
| Neurons           | -0.419  | 0.0495  | 2.57E-17  |
| Microglia         | 0.361   | 0.0428  | 3.32E-17  |
| Endothelial cells | -3.02   | 0.44    | 6.71E-12  |
| Microglia         | -0.222  | 0.0322  | 5.41E-12  |
| Neurons           | -0.696  | 0.0701  | 3.12E-23  |
| Endothelial cells | -0.99   | 0.108   | 4.88E-20  |
| Neurons           | -0.519  | 0.066   | 3.73E-15  |
| Oligodendroglia   | 0.0848  | 0.00765 | 1.48E-28  |
| Microglia         | -0.0317 | 0.00367 | 5.74E-18  |
| Microglia         | 0.513   | 0.0587  | 2.34E-18  |
| Neurons           | 0.449   | 0.0555  | 5.96E-16  |
| Endothelial cells | 0.997   | 0.119   | 5.38E-17  |
| Astrocytes        | -0.185  | 0.0114  | 3.19E-59  |
| Neurons           | -0.185  | 0.0114  | 3.19E-59  |
| Oligodendroglia   | -0.185  | 0.0114  | 3.19E-59  |
| Endothelial cells | -0.184  | 0.0114  | 1.33E-58  |
| Microglia         | -0.184  | 0.0114  | 1.33E-58  |
| Microglia         | -0.413  | 0.059   | 2.56E-12  |
| Neurons           | -1.82   | 0.0814  | 9.93E-111 |
| Microglia         | -1.57   | 0.0839  | 3.90E-78  |
| Endothelial cells | -1.36   | 0.136   | 1.52E-23  |
| Neurons           | -0.596  | 0.0764  | 6.14E-15  |
| Astrocytes        | 0.465   | 0.0644  | 5.18E-13  |
| Microglia         | -0.081  | 0.0113  | 7.60E-13  |
| Endothelial cells | -0.0801 | 0.0112  | 8.57E-13  |
| Neurons           | -0.0803 | 0.0113  | 1.19E-12  |
| Oligodendroglia   | -0.0779 | 0.0113  | 5.43E-12  |
| Endothelial cells | 0.685   | 0.0989  | 4.32E-12  |
| Microglia         | 2.12    | 0.128   | 1.30E-61  |
| Oligodendroglia   | 2.11    | 0.129   | 3.90E-60  |
| Astrocytes        | 2.12    | 0.13    | 8.70E-60  |
| Endothelial cells | 2.1     | 0.131   | 7.82E-58  |
| Neurons           | 2.1     | 0.131   | 7.82E-58  |

|                   |        |        |          |
|-------------------|--------|--------|----------|
| Endothelial cells | -0.69  | 0.0887 | 7.31E-15 |
| Microglia         | 0.746  | 0.0531 | 7.82E-45 |
| Neurons           | 0.783  | 0.0572 | 1.18E-42 |
| Endothelial cells | 0.656  | 0.0909 | 5.33E-13 |
| Microglia         | -0.683 | 0.099  | 5.24E-12 |
| Endothelial cells | 0.726  | 0.107  | 1.16E-11 |
| Neurons           | 0.509  | 0.0761 | 2.25E-11 |
| Neurons           | 1.44   | 0.209  | 5.58E-12 |
| Astrocytes        | 1.39   | 0.207  | 1.88E-11 |
| Microglia         | 1.37   | 0.205  | 2.34E-11 |
| Oligodendroglia   | 1.39   | 0.208  | 2.35E-11 |
| Endothelial cells | -0.892 | 0.113  | 2.93E-15 |
| Endothelial cells | 1.26   | 0.178  | 1.46E-12 |
| Neurons           | 0.117  | 0.012  | 1.84E-22 |
| Endothelial cells | 1.16   | 0.143  | 4.98E-16 |
| Endothelial cells | -0.662 | 0.0926 | 8.74E-13 |
| Endothelial cells | 1.31   | 0.147  | 5.03E-19 |
| Neurons           | 0.645  | 0.0823 | 4.61E-15 |
| Neurons           | -1.96  | 0.148  | 4.94E-40 |
| Astrocytes        | -1.91  | 0.147  | 1.34E-38 |
| Microglia         | -1.91  | 0.147  | 1.34E-38 |
| Oligodendroglia   | -1.91  | 0.147  | 1.34E-38 |
| Endothelial cells | -1.9   | 0.149  | 3.05E-37 |
| Microglia         | -2     | 0.168  | 1.12E-32 |
| Neurons           | 2.63   | 0.221  | 1.18E-32 |
| Astrocytes        | -2     | 0.169  | 2.59E-32 |
| Oligodendroglia   | -1.99  | 0.169  | 5.24E-32 |
| Endothelial cells | -1.99  | 0.171  | 2.66E-31 |
| Endothelial cells | 0.72   | 0.107  | 1.71E-11 |
| Endothelial cells | 0.96   | 0.13   | 1.53E-13 |
| Neurons           | 2.8    | 0.252  | 1.11E-28 |
| Astrocytes        | -2.14  | 0.203  | 5.54E-26 |
| Microglia         | -2.14  | 0.203  | 5.54E-26 |
| Oligodendroglia   | -2.14  | 0.203  | 5.54E-26 |
| Endothelial cells | -2.13  | 0.205  | 2.75E-25 |
| Endothelial cells | 0.872  | 0.105  | 1.00E-16 |
| Neurons           | 0.527  | 0.0766 | 5.99E-12 |
| Endothelial cells | 0.713  | 0.0958 | 9.87E-14 |
| Neurons           | 0.444  | 0.0616 | 5.69E-13 |

|                   |        |        |          |
|-------------------|--------|--------|----------|
| Endothelial cells | 0.916  | 0.132  | 3.94E-12 |
| Endothelial cells | 0.368  | 0.042  | 1.92E-18 |
| Neurons           | -0.358 | 0.0505 | 1.35E-12 |
| Endothelial cells | 5.9    | 0.586  | 7.63E-24 |
| Neurons           | 2.14   | 0.249  | 8.37E-18 |
| Astrocytes        | 79     | 11.5   | 6.44E-12 |
| Endothelial cells | 0.898  | 0.121  | 1.16E-13 |
| Endothelial cells | 1.14   | 0.13   | 1.80E-18 |
| Neurons           | 0.525  | 0.0676 | 8.08E-15 |
| Neurons           | 0.648  | 0.0964 | 1.79E-11 |
| Endothelial cells | 3.25   | 0.419  | 8.73E-15 |
| Neurons           | -2.23  | 0.32   | 3.20E-12 |
| Microglia         | 2.28   | 0.341  | 2.29E-11 |
| Neurons           | -1.33  | 0.152  | 2.13E-18 |
| Endothelial cells | 1.88   | 0.216  | 3.21E-18 |
| Endothelial cells | 1.58   | 0.224  | 1.74E-12 |
| Microglia         | -0.47  | 0.0613 | 1.76E-14 |
| Endothelial cells | 1.44   | 0.207  | 3.49E-12 |
| Endothelial cells | -5.38  | 0.526  | 1.48E-24 |
| Astrocytes        | 17.6   | 2.43   | 4.40E-13 |
| Neurons           | -1.35  | 0.193  | 2.66E-12 |
| Endothelial cells | 1.13   | 0.142  | 1.75E-15 |
| Astrocytes        | 1.46   | 0.186  | 4.18E-15 |
| Oligodendroglia   | 1.46   | 0.186  | 4.18E-15 |
| Microglia         | 1.45   | 0.185  | 4.58E-15 |
| Neurons           | 1.45   | 0.188  | 1.23E-14 |
| Endothelial cells | 1.44   | 0.188  | 1.87E-14 |
| Endothelial cells | -2.14  | 0.254  | 3.60E-17 |
| Endothelial cells | 0.988  | 0.137  | 5.53E-13 |
| Neurons           | 0.645  | 0.092  | 2.37E-12 |
| Endothelial cells | 1      | 0.118  | 2.36E-17 |
| Neurons           | 0.419  | 0.0601 | 3.13E-12 |
| Endothelial cells | 0.828  | 0.122  | 1.15E-11 |
| Neurons           | 0.572  | 0.086  | 2.91E-11 |
| Endothelial cells | 1.74   | 0.192  | 1.27E-19 |
| Neurons           | 0.926  | 0.108  | 9.99E-18 |
| Oligodendroglia   | -5.17  | 0.752  | 6.20E-12 |
| Microglia         | 0.261  | 0.039  | 2.20E-11 |
| Neurons           | 0.545  | 0.061  | 4.09E-19 |

|                   |        |        |          |
|-------------------|--------|--------|----------|
| Endothelial cells | 0.904  | 0.104  | 3.55E-18 |
| Endothelial cells | -2.02  | 0.217  | 1.29E-20 |
| Neurons           | 0.403  | 0.058  | 3.70E-12 |
| Endothelial cells | 0.558  | 0.0656 | 1.80E-17 |
| Neurons           | 0.266  | 0.0384 | 4.30E-12 |
| Microglia         | 1.66   | 0.176  | 4.03E-21 |
| Neurons           | 1.52   | 0.163  | 1.11E-20 |
| Endothelial cells | 2.1    | 0.313  | 1.96E-11 |
| Microglia         | -0.53  | 0.0382 | 9.06E-44 |
| Neurons           | -0.444 | 0.0422 | 6.89E-26 |
| Endothelial cells | -0.564 | 0.0699 | 7.11E-16 |
